# Supplementary material for: The Chagas disease study landscape: A systematic review of clinical and observational antiparasitic treatment studies to assess the potential for establishing an individual participant-level data platform
Source: PLoS Negl Trop Dis. 2021 Aug 16;15(8):e0009697. doi: 10.1371/journal.pntd.0009697 (PMC8428795; doi:10.1371/journal.pntd.0009697)
Supplement: S2 Data — (XLSX) [file pntd.0009697.s004.xlsx]

## Sheet: Excl. title&abstract
EXCLUDED CITATIONS FROM FORMAL DATABASE SEARCHES AT LEVEL OF TITLE AND ABSTRACT
Title	Authors	Abstract	Published Year	Published Month	Journal	Volume	Issue	Pages	Accession Number	DOI	Study
Seronegativity to polio viruses among previously immunized adult candidates to solid organ transplantation	Brandao, L. G. P.; Brasil, Peaad; Oliveira, S. S.; Silva, E. E. D.; Lopes, G. S.	In the current effort to eliminate polio from the world, it is important to recognize and vaccinate susceptible groups, especially immunocompromised patients living in countries where attenuated polio vaccine is still used. In this report, we describe the frequency of protective antibodies in a small sample of adult SOT candidates in whom previous vaccination could be ascertained. Patients includ…	2018	Mar - Apr	Brazilian Journal of Infectious Diseases	22	2	150-152	29500943	https://dx.doi.org/10.1016/j.bjid.2018.02.003	Brandao 2018
Mortality and Stroke Recurrence in a Rehabilitation Cohort of Patients with Cerebral Infarcts and Chagas Disease	Montanaro, V. V. A.; Hora, T. F.; Da Silva, C. M.; Santos, C. V. D. V.; Lima, M. I. R.; Negrao, E. M.; Ribeiro, D. S. M.; Oliveira, E. M. D. J.; De Freitas, G. R.	Background: Chagas disease is related to ischemic stroke (IS), although few epidemiological studies have evaluated the associated mortality and recurrence. Our objective is to determine factors associated with mortality and recurrence of IS in patients with IS and Chagas disease. Method(s): We retrospectively studied data obtained from electronic medical records of patients admitted at SARAH Hosp…	2018	2021-05-01	European Neurology	79	2021-04-03	177-184	621304586	http://dx.doi.org/10.1159/000488033	Montanaro 2018
Alterations in the IL27 pathway are correlated with the loss of trypanosoma cruzi-specific t cells in patients with chronic chagas disease	Natale, M. A.; Minning, T.; Alvarez, M. G.; Viotti, R.; Bertocchi, G.; Lococo, B.; Albareda, M. C.; Tarleton, R. L.; Laucella, S. A.	We have previously shown that chronically T. cruzi-infected subjects bear several features of a process of immune exhaustion including an inverse correlation between disease severity and the magnitude of T cell responses, and alterations in the signaling pathway of the IL-7R. Like IL-7, IL-27 also exerts its function through STAT5. In this study, we performed an analysis of the expression of the …	2017	November	American Journal of Tropical Medicine and Hygiene	97 (5 Supplement 1)		240	620729925		Natale 2017
Jozilebomines A and B, Naphthylisoquinoline Dimers from the Congolese Liana Ancistrocladus ileboensis, with Antiausterity Activities against the PANC-1 Human Pancreatic Cancer Cell Line	Li, J.; Seupel, R.; Bruhn, T.; Feineis, D.; Kaiser, M.; Brun, R.; Mudogo, V.; Awale, S.; Bringmann, G.	Two new naphthylisoquinoline dimers, jozilebomines A (1a) and B (1b), were isolated from the roots of the Congolese plant Ancistrocladus ileboensis, along with the known dimer jozimine A<inf>2</inf> (2). These compounds are Dioncophyllaceae-type metabolites, i.e., lacking oxygen functions at C-6 and with an R-configuration at C-3 in their tetrahydroisoquinoline moieties. The dimers 1a and 1b cons…	2017	2021-10-27	Journal of Natural Products	80	10	2807-2817	619013149	http://dx.doi.org/10.1021/acs.jnatprod.7b00650	Li 2017
Increased aortic stiffness in adults with chronic indeterminate Chagas disease	Valbusa, F.; Angheben, A.; Mantovani, A.; Zerbato, V.; Chiampan, A.; Bonapace, S.; Rodari, P.; Agnoletti, D.; Arcaro, G.; Fava, C.; Bisoffi, Z.; Targher, G.	An ever-increasing number of patients with chronic indeterminate Chagas disease are diagnosed with early vascular and cardiac abnormalities, as cardiovascular imaging becomes more sensitive. However, the currently available information on aortic stiffness (a prognostic marker for adverse cardiovascular outcomes) in these patients is scarce. In this study, we consecutively recruited 21 asymptomati…	2019			14	8	e0220689	31374101	https://dx.doi.org/10.1371/journal.pone.0220689	Valbusa 2019
EKG abnormalities in chronic chagas heart disease correlate with scar mass and left ventricular dysfunction as assessed by cardiac magnetic resonance imaging	Schmidt, A.; Braggion-Santos, M. F.; Branco, M.; Moreira, H. T.; Volpe, G. J.; Simoes, M. V.; Romano, M. M. D.; Pazin-Filho, A.; Maciel, B. C.; Marin-Neto, J. A.	Electrocardiographic (EKG) abnormalities are early findings in most patients with Chagas Heart Disease (CHD). Small previous reports suggested that advanced EKG abnormalities were related to a poorer prognosis. Cardiac Magnetic Resonance Imaging (CMRI) can precisely measure LV ejection fraction and volumes and scar mass. We sought to investigate if EKG abnormalities found in CHD patients could in…	2017	August	European Heart Journal	38 (Supplement 1)		828	621235502	http://dx.doi.org/10.1093/eurheartj/ehx502.P3982	Schmidt 2017
Evaluation of myocardial deformation by tissuetracking-CMR in the indeterminate form of chagas disease	Placido, R.; Almeida, A. G.; Cunha Lopes, B.; Guimaraes, T.; Pinto, F. J.; Rochitte, C. E.	Objectives: Chagasic cardiomyopathy (CC) is characterized by progressive tissue destruction and fibrosis, being one of the main public health problems in South America. At present, early detection of cardiac involvement is limited by the absence of validated diagnostic criteria, particularly in the indeterminate form (IF) of the disease. The evaluation of myocardial deformation is an attractive m…	2017	May	European Heart Journal Cardiovascular Imaging	18 (Supplement 2)		ii58	625723629	http://dx.doi.org/10.1093/ehjci/jex123	Placido 2017
The use of ripple mapping to identify conducting channels in patients with chagas cardiomyopathy	Pisani, C. F.; Raimundi, F.; Chokr, M. O.; Hardy, C. A.; Melo, S. L.; Da Costa Darrieux, F. C.; Hachul, D.; Scanavacca, M.	Background: Ripple mapping (RM) is a novel tool that can identify slow conduction channels within the SCAR in ischemic cardiomyopathy, although it has not been studied in Chagas cardiomyopathy. Objective(s): To evaluate ripple mapping during Ventricular pacing rhythm in patients with Chagas Cardiomyopathy aiming to identify slow conducting areas suggesting the presence of channels. Method(s): We …	2018	May	Heart Rhythm	15 (5 Supplement 1)		S621-S622	622470682		Pisani 2018
The chagas disease study landscape: Preliminary analysis of a systematic review of clinical trials and observational studies to assess the feasibility of establishing an individual participant-level data (IPD) platform	Maguire, B. J.; Chatelain, E.; Barreira, F.; Estani, S. S.; Guerin, P. J.	Significant limitations still exist in our understanding of Chagas disease including its pathologies, factors relating to progression, biomarkers to indicate parasite clearance or cure and optimal treatment regimens for all patient populations. Existing data collected in past trials could be standardised and pooled to address research priorities and knowledge gaps. We conducted a systematic liter…	2018	October	American Journal of Tropical Medicine and Hygiene	99 (4 Supplement)		180	627540204		Maguire 2018
High sensitive cardiac troponin elevations in patients with Chagas disease without evidence of structural heart affection	Dizeo, C.; Chirino, D. A.; Volverg, V.; Ferrer, L.; Rinaldi, M. C.; Coyle, J.; Marquez, G.; Guthmann, M. G.; Palacios, R.; Calderon, G.	Background: About 30% of patients with Chagas develop heart disease during their evolution. Exist a long asymptomatic period of time where there is no clear evidence of structural heart disease, however some incipient changes have been described during this period. High sensitivity T-troponin (HS-TnT) is a specific marker of myocardial damage and its elevation is associated with higher risk. The …	2018	August	European Heart Journal	39 (Supplement 1)		311	627214839	http://dx.doi.org/10.1093/eurheartj/ehy565.P1600	Dizeo 2018
Nitric oxide and kinins system plasma levels in patients with chronic Chagas heart disease and systemic arterial hypertension	Bestetti, R.; Dellalibera-Joviliano, R.; Lopes, G.; Furlan-Daniel, R.; Faria-Jr, M.; Lopes, K.; Iucif-Jr, N.	Background. Nitric oxide (NO) is one of the most important metabolic modulators of blood pressure and cardiovascular function. Its production can be stimulated by bradykinin, the main peptide generated by the kinins system (KS), as well as by infammatory mediators such as cytokines. Purpose. Considering that, 30% to 40% of patients infected with T. cruzi develop chronic Chagas' Heart Disease (CCH…	2019	May	European journal of heart failure	21 (Supplement 1)		130	628559611	http://dx.doi.org/10.1002/ejhf.1488	Bestetti 2019
Tuberculosis-HIV treatment with rifampicin or rifabutin: are the outcomes different?	Schmaltz, C. A. S.; Demitto, F. O.; Sant'Anna, F. M.; Rolla, V. C.	BACKGROUND: Rifamycins are a group of antibiotics mainly used in the treatment of tuberculosis (TB), however they interact with antiretroviral therapy (ART). Rifabutin allows more regimens options for concomitant imunodeficiency virus (HIV) treatment compared to rifampicin._x000D_OBJECTIVE: Compare the outcomes of TB-HIV co-infected patients who used rifampicin or rifabutin._x000D_METHODS: We ana…	2019	2011-02-01	Mem Inst Oswaldo Cruz	114		e180420	30758392	https://dx.doi.org/10.1590/0074-02760180420	Schmaltz 2019
Two-scale dispersal estimation for biological invasions via synthetic likelihood	Barbu, C. M.; Sethuraman, K.; Billig, E. M. W.; Levy, M. Z.	Biological invasions reshape environments and affect the ecological and economic welfare of states and communities. Such invasions advance on multiple spatial scales, complicating their control. When modeling stochastic dispersal processes, intractable likelihoods and autocorrelated data complicate parameter estimation. As with other approaches, the recent synthetic likelihood framework for stoch…	2018	Apr	Ecography	41	4	661-672	30104817	https://dx.doi.org/10.1111/ecog.02575	Barbu 2018
Ubiquitin Proteasome pathway proteins as potential drug targets in parasite Trypanosoma cruzi	Gupta, I.; Aggarwal, S.; Singh, K.; Yadav, A.; Khan, S.	Trypanosomiasis infects more than 21 million people and claims approximately 2 million lives annually. Due to the development of resistance against currently available anti-trypanosomal drugs, there is a growing need for specific inhibitors and novel drug targets. Of late, the proteins from the Ubiquitin Proteasome Pathway (UPP): ubiquitin ligases and deubiquitinase have received attention as pot…	2018	1930-05-01	Scientific reports	8	1	8399	29849031	https://dx.doi.org/10.1038/s41598-018-26532-z	Gupta 2018
Uncovering Trypanosoma spp. diversity of wild mammals by the use of DNA from blood clots	Rodrigues, M. S.; Lima, L.; Xavier, S. C. D. C.; Herrera, H. M.; Rocha, F. L.; Roque, A. L. R.; Teixeira, M. M. G.; Jansen, A. M.	Trypanosoma spp. infection in wild mammals is detected mainly through parasitological tests that usually display low sensitivity. We propose the use of DNA extracted directly from blood clots (BC), which are neglected sources of DNA for diagnosis and identification of Trypanosoma spp. This approach followed by nested PCR targeting the 18S SSU rDNA demonstrated to be sensitive and suitable to eval…	2019	April	International Journal for Parasitology: Parasites and Wildlife	8		171-181	2001603906	http://dx.doi.org/10.1016/j.ijppaw.2019.02.004	Rodrigues 2019
Uncovering the hidden cost of bed bugs	Scarpino, S. V.; Althouse, B. M.		2019	2021-04-09	Proceedings of the National Academy of Sciences of the United States of America	116	15	7160-7162	2001806078	http://dx.doi.org/10.1073/pnas.1902404116	Scarpino 2019
Unconventional Pro-inflammatory CD4<sup>+</sup> T Cell Response in B Cell-Deficient Mice Infected with Trypanosoma cruzi	Gorosito Serran, M.; Tosello Boari, J.; Fiocca Vernengo, F.; Beccaria, C. G.; Ramello, M. C.; Bermejo, D. A.; Cook, A. G.; Vinuesa, C. G.; Montes, C. L.; Acosta Rodriguez, E. V.; Gruppi, A.	Chagas disease, caused by the parasite Trypanosoma cruzi, is endemic in Latin America but has become a global public health concern by migration of infected people. It has been reported that parasite persistence as well as the intensity of the inflammatory immune response are determinants of the clinical manifestations of the disease. Even though inflammation is indispensable for host defense, wh…	2017		Frontiers in Immunology	8		1548	29209313	https://dx.doi.org/10.3389/fimmu.2017.01548	GorositoSerran 2017
Trypomastigote Excretory Secretory Antigen Blot Is Associated With Trypanosoma cruzi Load and Detects Congenital T. cruzi Infection in Neonates, Using Anti-Shed Acute Phase Antigen Immunoglobulin M	Noazin, S.; Lee, J. A.; Malaga, E. S.; Valencia Ayala, E.; Condori, B. J.; Roca, C.; Lescano, A. G.; Bern, C.; Castillo, W.; Mayta, H.; Menduina, M. C.; Verastegui, M. R.; Tinajeros, F.; Gilman, R. H.; Chagas Working Group in, Bolivia; Peru,	Background: Congenital Trypanosoma cruzi infection accounts for an estimated 22% of new cases of Chagas disease in Latin America. However, neonatal diagnosis is challenging, as 9-month follow-up for immunoglobulin G testing is poor, quantitative polymerase chain reaction (qPCR) analysis is not routinely performed, and the micromethod misses >=40% of congenital infections._x000D_Methods: Bioreposi…	2019	2029-01-01	Journal of Infectious Diseases	219	4	609-618	30252099	https://dx.doi.org/10.1093/infdis/jiy562	Noazin 2019
High rate of seromarkers for HIV, HBV and syphilis among blood donors using confidential unit exclusion, before and after HIV-NAT implementation at a major public blood bank in the Brazilian Amazon	Souza, J. C.; Crispim, M. A. E.; Abrahim, C.; Fraiji, N. A.; Kiesslich, D.; Stefani, M. M. A.	BACKGROUND: Confidential unit exclusion (CUE) was introduced in the 1980's as an additional layer to blood safety, before highly specific and sensitive nucleic acid tests (NAT) for HIV were implemented. The utility of CUE-use in settings that have implemented NAT should be evaluated over time._x000D_STUDY DESIGN, METHODS: Cross-sectional retrospective study carried out from June 2010-November 201…	2019	2	Transfusion	59	2	629-638	30499594	https://dx.doi.org/10.1111/trf.15045	Souza 2019
Vaccine-Linked Chemotherapy Improves Benznidazole Efficacy for Acute Chagas Disease	Jones, K.; Versteeg, L.; Damania, A.; Keegan, B.; Kendricks, A.; Pollet, J.; Cruz-Chan, J. V.; Gusovsky, F.; Hotez, P. J.; Bottazzi, M. E.	Chagas disease affects 6 to 7 million people worldwide, resulting in significant disease burdens and health care costs in countries of endemicity. Chemotherapeutic treatment is restricted to two parasiticidal drugs, benznidazole and nifurtimox. Both drugs are highly effective during acute disease but are only minimally effective during chronic disease and fraught with significant adverse clinical…	2018	4	Infection & Immunity	86	4	4	29311242	https://dx.doi.org/10.1128/IAI.00876-17	Jones 2018
Utilization of proliferable extracellular amastigotes for transient gene expression, drug sensitivity assay, and CRISPR/Cas9-mediated gene knockout in Trypanosoma cruzi	Takagi, Y.; Akutsu, Y.; Doi, M.; Furukawa, K.	Trypanosoma cruzi has three distinct life cycle stages; epimastigote, trypomastigote, and amastigote. Amastigote is the replication stage in host mammalian cells, hence this stage of parasite has clinical significance in drug development research. Presence of extracellular amastigotes (EA) and their infection capability have been known for some decades. Here, we demonstrate that EA can be utilize…	2019	1		13	1	e0007088	30640901	https://dx.doi.org/10.1371/journal.pntd.0007088	Takagi 2019
Uso de abrigos em espÃ©cies do gÃªnero Rhodnius	Duran, Katherine Dayann Mosquera	Os triatomÃ­neos sÃ£o insetos vetores do Trypanosoma cruzi, agente etiolÃ³gico da doenÃ§a de Chagas. EspÃ©cies pertencentes ao gÃªnero Rhodnius tÃªm sido reportadas habitando ambientes domÃ©sticos e peridomÃ©sticos em diferentes regiÃµes da AmÃ©rica Latina. No entanto, aspectos comportamentais e de ecologia sensorial relacionados ao uso de abrigos tÃªm sido pouco estudados nestas espÃ©cies. O pre…	2017	2017/00				55-55			Duran 2017
Using the health belief model to identify communication opportunities to prevent Chagas disease in Southern Ecuador	Patterson, N. M.; Bates, B. R.; Chadwick, A. E.; Nieto-Sanchez, C.; Grijalva, M. J.	BACKGROUND: Chagas disease (CD) is a life-threatening illness caused by the protozoan parasite Trypanosoma cruzi, which is transmitted by triatomine bugs. Triatomine bugs inhabit poorly constructed homes that create multiple hiding spots for the bugs. Modifying the actual structure of a home, along with the homeowners' practices, can reduce triatomine infestation. This research was designed to co…	2018	9		12	9	e0006841	30260961	https://dx.doi.org/10.1371/journal.pntd.0006841	Patterson 2018
Using prodigiosin against some gram-positive and gram-negative bacteria and Trypanosoma cruzi	Herraez, R.; Mur, A.; Merlos, A.; Vinas, M.; Vinuesa, T.	Background: This work aimed to explore the action of natural prodigiosin on both bacterial organisms and Trypanosoma cruzi cells._x000D_Methods: Natural prodigiosin pigment was extracted and purified from cultures of Serratia marcescens. Two media, peanut broth and peptone glycerol broth, both recommended in the literature for prodigiosin production, were compared. The prodigiosin obtained was em…	2019		The Journal of Venomous Animals & Toxins Including Tropical Diseases	25		e20190001	31210760	https://dx.doi.org/10.1590/1678-9199-JVATITD-2019-0001	Herraez 2019
Using Human Induced Pluripotent Stem Cell-Derived Cardiomyocytes as a Model to Study Trypanosoma cruzi Infection	Bozzi, A.; Sayed, N.; Matsa, E.; Sass, G.; Neofytou, E.; Clemons, K. V.; Correa-Oliveira, R.; Stevens, D. A.; Wu, J. C.	Chagas disease (ChD) is one of the most neglected tropical diseases, with cardiomyopathy being the main cause of death in Trypanosoma cruzi-infected patients. As the parasite actively replicates in cardiomyocytes (CMs), the heart remains a key target organ in the pathogenesis of ChD. Here we modeled ChD using human induced pluripotent stem cell-derived CMs (iPSC-CMs) to understand the complex int…	2019	2021-06-11	Stem Cell Reports	12	6	1232-1241	2002073433	http://dx.doi.org/10.1016/j.stemcr.2019.04.017	Bozzi 2019
Using FT-IR spectroscopy for the identification of the T. cruzi, T. rangeli, and the L. chagasi species	Aguiar, J. C.; Mittmann, J.; Caetano, P. C. Junior; Raniero, L.	The cross-reaction in the diagnosis results is a serious problem, leading to an incorrect treatment and several injuries to patients. The Trypanosoma rangeli and Trypanosoma cruzi belong to the genus Trypanosoma, but the Trypanosoma rangeli is a non-pathogenic parasite to humans. While Trypanosoma cruzi is the etiological agent of Chagas' disease, which affects circa 2-3 million people and more t…	2018	Sep	Experimental Parasitology	192		46-51	30031122	https://dx.doi.org/10.1016/j.exppara.2018.07.008	Aguiar 2018
Usefulness of FC-TRIPLEX Chagas/Leish IgG1 as confirmatory assay for non-negative results in blood bank screening of Chagas disease	Campos, F. M. F.; Repoles, L. C.; de Araujo, F. F.; Peruhype-Magalhaes, V.; Xavier, M. A. P.; Sabino, E. C.; de Freitas Carneiro Proietti, A. B.; Andrade, M. C.; Teixeira-Carvalho, A.; Martins-Filho, O. A.; Gontijo, C. M. F.	A relevant issue in Chagas disease serological diagnosis regards the requirement of using several confirmatory methods to elucidate the status of non-negative results from blood bank screening. The development of a single reliable method may potentially contribute to distinguish true and false positive results. Our aim was to evaluate the performance of the multiplexed flow-cytometry anti-T. cruz…	2018	April	Journal of Immunological Methods	455		34-40	620426662	http://dx.doi.org/10.1016/j.jim.2018.01.006	Campos 2018
Toward a Drug Against All Kinetoplastids: From LeishBox to Specific and Potent Trypanothione Reductase Inhibitors	Ilari, A.; Genovese, I.; Fiorillo, F.; Battista, T.; De Ionna, I.; Fiorillo, A.; Colotti, G.	Leishmaniasis, Chagas disease, and sleeping sickness affect millions of people worldwide and lead to the death of about 50000 humans per year. These diseases are caused by the kinetoplastids Leishmania, Trypanosoma cruzi, and Trypanosoma brucei, respectively. These parasites share many general features, including gene conservation, high amino acid identity among proteins, the presence of subcellu…	2018	08 06	Molecular Pharmaceutics	15	8	3069-3078	29897765	https://dx.doi.org/10.1021/acs.molpharmaceut.8b00185	Ilari 2018
Toward an Ecological Framework for Assessing Reservoirs of Vector-Borne Pathogens: Wildlife Reservoirs of Trypanosoma cruzi across the Southern United States	Hodo, C. L.; Hamer, S. A.	Wildlife species are critical for both feeding vectors and serving as reservoirs of zoonotic vector-borne pathogens. Transmission pathways leading to disease in humans or other target taxa might be better understood and managed given a complete understanding of the relative importance of different reservoir species in nature. Using the conceptual framework of "reservoir potential," which consider…	2017	12 15	ILAR Journal	58	3	379-392	29106561	https://dx.doi.org/10.1093/ilar/ilx020	Hodo 2017
Towards Chagas disease elimination: Neonatal screening for congenital transmission in rural communities	Pennington, P. M.; Juarez, J. G.; Arrivillaga, M. R.; De Urioste-Stone, S. M.; Doktor, K.; Bryan, J. P.; Escobar, C. Y.; Cordon-Rosales, C.	Chagas disease is a neglected tropical disease that continues to affect populations living in extreme poverty in Latin America. After successful vector control programs, congenital transmission remains as a challenge to disease elimination. We used the PRECEDE-PROCEED planning model to develop strategies for neonatal screening of congenital Chagas disease in rural communities of Guatemala. These …	2017	Sep		11	9	e0005783	28892479	https://dx.doi.org/10.1371/journal.pntd.0005783	Pennington 2017
A trajetÃ³ria histÃ³rica da Escola de Enfermagem da Universidade Federal de Minas Gerais: desdobramentos da federalizaÃ§Ã£o 1950-2004	Santos, Fernanda Batista Oliveira	Esta pesquisa teve como objetivo analisar a trajetÃ³ria histÃ³rica da Escola de Enfermagem da Universidade Federal de Minas Gerais, tendo como foco a sua federalizaÃ§Ã£o. O marco inicial (1950) corresponde ao ano da anexaÃ§Ã£o da Escola de Enfermagem Carlos Chagas Ã Faculdade de Medicina, federalizada como unidade acadÃªmica da Universidade Federal de Minas Gerais por meio da Lei Federal 775/1949…	2018	2018/00				187-187			Santos 2018
Transcriptome Studies in Trypanosoma cruzi Using RNA-seq	Greif, G.; Berna, L.; Diaz-Viraque, F.; Robello, C.	RNA-seq is a powerful method to study in detail transcriptome changes in defined conditions, providing enormous amount of information on RNA stability and gene regulation. In this chapter, we describe a directional and a nondirectional library preparation protocol for RNA-seq in Trypanosoma cruzi, as well as a pipeline for bioinformatic analysis, which includes read trimming, alignment to a refer…	2019		Methods in Molecular Biology	1955		35-45	30868517	https://dx.doi.org/10.1007/978-1-4939-9148-8_3	Greif 2019
Transfusion risk of trypanosoma cruzi: Screening of blood donors at the parasitology laboratory of Pisa university hospital	Rossi, L.; Mangano, V.; Marvelli, A.; Papotto, L.; Agnorelli, D.; Moscato, G. A.; Castagna, B.; Bruschi, F.	Background Chagas disease is caused by the protozoan parasite Trypanosoma cruzi and transmitted by blood-sucking triatomine bugs. Most infections result in a non-patent chronic form of the disease, which can either never develop clinically or progress to potentially fatal disease. In countries where vector transmission is absent, the most common route of infection is blood transfusion or transpla…	2017	June	Clinical Chemistry and Laboratory Medicine	55 (Supplement 1)		S919	616772995	http://dx.doi.org/10.1515/cclm-2017-5026	Rossi 2017
Transmigration of Trypanosoma cruzi Trypomastigotes through 3D Spheroids Mimicking Host Tissues	Rodriguez, M. E.; Rizzi, M.; Caeiro, L.; Masip, Y.; Sanchez, D. O.; Tekiel, V.	While cellular invasion by T. cruzi trypomastigotes and intracellular amastigote replication are well-characterized events that have been described by using 2D monolayer cultures, other relevant parasite-host interactions, like the dynamics of tissue invasiveness, cannot be captured using monolayer cultures. Spheroids constitute a valuable three-dimensional (3D) culture system because they mimic …	2019		Methods in Molecular Biology	1955		165-177	30868526	https://dx.doi.org/10.1007/978-1-4939-9148-8_12	Rodriguez 2019
Transmission scenarios of major vector-borne diseases in Colombia, 1990-2016	Padilla, J. C.; Lizarazo, F. E.; Murillo, O. L.; Mendigana, F. A.; Pachon, E.; Vera, M. J.	Introduccion. Las enfermedades transmitidas por vectores representan mas de 17 % de todas las enfermedades infecciosas y causan anualmente un millon de defunciones a nivel mundial. En Colombia, la malaria, el dengue, la enfermedad de Chagas y las leishmaniasis son condiciones endemoepidemicas persistentes.Objetivo. Determinar el comportamiento epidemiologico de las enfermedades transmitidas por v…	2017	2029-03-01	Biomedica	37	0	27-40	29165933	https://dx.doi.org/10.7705/biomedica.v37i0.3769	Padilla 2017
Transmission of Donor-Derived Trypanosoma cruzi and Subsequent Development of Chagas Disease in a Lung Transplant Recipient	Corey, A. B.; Sonetti, D.; Maloney, J. D.; Montgomery, S. P.; Rademacher, B. L.; Taylor, L. J.; Smith, J. A.; Striker, R.	Donor infection status should be considered when accepting an organ for transplant. Here we present a case of Chagas disease developing after a lung transplant where the donor was known to be Trypanosoma cruzi antibody positive. The recipient developed acute Trypanosoma cruzi infection with reactivation after treatment. Chagas disease-positive donors are likely to be encountered in the United Sta…	2017		Case Reports Infectious Diseases	2017		5381072	28912986	https://dx.doi.org/10.1155/2017/5381072	Corey 2017
Transmission congenitale de la maladie de Chagas	Bouree, P.		2019	2001-02-01	Medecine et Sante Tropicales	29	1	26-27	31031240	https://dx.doi.org/10.1684/mst.2018.0846	Bouree 2019
Video-assisted thoracoscopic cardiac denervation of refractory ventricular arrhythmias and electrical storms: a single-center series	Tellez, L. J.; Garzon, J. C.; Vinck, E. E.; Castellanos, J. D.	BACKGROUND: The combined treatment of beta-blockers with ablation and Implanted cardioverter defibrillation therapy, continues to be the mainstay treatment for ventricular arrhythmias (VAs). Despite treatment, some patients remain refractory. Recent studies have shown success rates using video-assisted thoracoscopic (VATS) cardiac denervation as an effective therapeutic option for these patients.…	2019	2021-01-01	Journal of cardiothoracic surgery	14	1	17	30665431	https://dx.doi.org/10.1186/s13019-019-0838-6	Tellez 2019
Vertically transmitted infections among pregnant women in Mato grosso do sul, Brazil, and high-risk	Santos, S.; DeSouza Moraes, P. R.; Palmieri, J.; Marques, M.	Objectives: To estimate the rates of vertically transmitted infection (VTI) for 2016 in Mato Grosso do Sul State, among pregnant women screened by the Institute for Research, Teaching, and Diagnosis of the Association of Parents and Friends of Children with Special Needs (IPED-APAE), and to identify the counties where the risk for VTI is highest. Method(s): This descriptive, retrospective, cross-…	2018	October	International Journal of Gynecology and Obstetrics	143 (Supplement 3)		628	624606641	http://dx.doi.org/10.1002/ijgo.12583	Santos 2018
Ventricular tachycardia of unusual etiology	Chakraborty, P.; Isser, H. S.; Arava, S.	Introduction: Apart from Coronary artery disease, left ventricular tachycardia may result from cardiac sarcoidosis, left ventricular tumor, chagas disease and idiopathic left ventricular tachycardia. Methods: N/A Results: A 45 year old male, worker of stone cutting factory, presented with sustained monomorphic ventricular tachycardia of right bundle branch morphology(Fig: 1A). The tachycardia was…	2017	June	Europace	19 (Supplement 3)		iii341-iii342	618767706		Chakraborty 2017
Ventricular Tachycardia in the Setting of Chagasic Cardiomyopathy: Use of Voltage Mapping to Characterize Endoepicardial Nonischemic Scar Distribution	Soto-Becerra, R.; Bazan, V.; Bautista, W.; Malavassi, F.; Altamar, J.; Ramirez, J. D.; Everth, A.; Callans, D. J.; Marchlinski, F. E.; Rodriguez, D.; Garcia, F. C.; Saenz, L. C.	BACKGROUND: Chagasic cardiomyopathy (CC) is the most frequent nonischemic substrate causing left ventricular (LV) tachycardia in Latin America. Systematic characterization of the LV epicardial/endocardial scar distribution and density in CC has not been performed. Additionally, the usefulness of unipolar endocardial electroanatomic mapping to identify epicardial scar has not been assessed in this…	2017	Nov	Circulation: Arrhythmia and Electrophysiology	10	11		29133379	https://dx.doi.org/10.1161/CIRCEP.116.004950	Soto-Becerra 2017
Ventricular conduction disturbances in patients with chagas' disease and clinical correlation	Braga, L. M.; Blackman, A.; Junqueira, L. F.	Introduction: Chagas' disease is still a public health problem in Latin American countries. It affects the population with low socioeconomic status, and it is considered a neglected tropical disease. Objective(s): to identify and classify the ventricular conduction disturbances in patients with chronic Chagas's disease and correlate them with some clinical and epidemiological aspects. Method(s): …	2019	March - April	Journal of Electrocardiology	53		e12	2001784033	http://dx.doi.org/10.1016/j.jelectrocard.2019.01.043	Braga 2019
Vectors of diversity: Genome wide diversity across the geographic range of the Chagas disease vector Triatoma dimidiata sensu lato (Hemiptera: Reduviidae)	Justi, S. A.; Cahan, S.; Stevens, L.; Monroy, C.; Lima-Cordon, R.; Dorn, P. L.	To date, the phylogeny of Triatoma dimidiata sensu lato (s. l.) (Hemiptera: Reduviidae: Triatominae), the epidemiologically most important Chagas disease vector in Central America and a secondary vector in Mexico and northern South America, has only been investigated by one multi-copy nuclear gene (Internal Transcribed Spacer - 2) and a few mitochondrial genes. We examined 450 specimens sampled a…	2018	2021-03-01	Molecular phylogenetics and evolution	120		144-150	623332475	http://dx.doi.org/10.1016/j.ympev.2017.12.016	Justi 2018
Variable numbers of calreticulin genes in Trypanosoma cruzi correlate with atypical morphology and protein expression	Gonzalez, A.; Hartel, S.; Mansilla, J.; Sanchez-Valdez, F.; Ferreira, A.	Trypanosoma cruzi calreticulin (TcCalr, formerly known as TcCRT), upon binding to Complement (C) C1 and ficolins, inhibits the classical and lectin pathways and promotes infectivity. This virulence correlates with the expression of TcCalr. The TcCalr C inhibitory capacity was shown in a previous work using a clonal epimastigote cell line from the TCC T. cruzi strain, lacking one TcCalr allele (Tc…	2018	12	Immunobiology	223	12	802-806	30131175	https://dx.doi.org/10.1016/j.imbio.2018.08.005	Gonzalez 2018
Variability of defensin genes from a Mexican endemic Triatominae: Triatoma (Meccus) pallidipennis (Hemiptera: Reduviidae)	Diaz-Garrido, P.; Sepulveda-Robles, O.; Martinez-Martinez, I.; Espinoza, B.	Chagas disease remains a serious health problem for countries where the most common mode of transmission is infection contracted from the feces of a Triatominae insect vector. In Mexico, 32 species of Triatoma have been identified; amongst them, Triatoma (Meccus) pallidipennis is an endemic species reported to have high percentages of infection with T. cruzi Defensins, cysteine-rich cationic pept…	2018	10 31	Bioscience Reports	38	5	31	30181380	https://dx.doi.org/10.1042/BSR20180988	Diaz-Garrido 2018
Value of Chronotropic Index In Chagas Disease Without Proven Pathology	Davolos, I.; Bucay, C.; Arioni, M.; Ortiz, M.; Dominguez, C.; Berensztein, C. S.	Introduction: Chagas disease (ChD) can develop cardiac complications. Despite the overwhelming progress of medicine, the validity of ergometry (EG) in individuals without proven pathology is highlighted. Objective(s): 1) Describe baseline electrocardiographic and ergometric characteristics of a population with ChD; 2) Compare the utility of calculating the chronotropic index (ICr) over the percen…	2018	December	Global Heart	13 (4)		400-401	2001223648	http://dx.doi.org/10.1016/j.gheart.2018.09.090	Davolos 2018
Validation of rK39 immunochromatographic test and direct agglutination test for the diagnosis of Mediterranean visceral leishmaniasis in Spain	Bangert, M.; Flores-Chavez, M. D.; Llanes-Acevedo, I. P.; Arcones, C.; Chicharro, C.; Garcia, E.; Ortega, S.; Nieto, J.; Cruz, I.	Background: Visceral leishmaniasis (VL), the most severe form of leishmaniasis, is endemic in Europe with Mediterranean countries reporting endemic status alongside a worrying northward spread. Serological diagnosis, including immunochromatographic test based on the recombinant antigen rK39 (rK39-ICT) and a direct agglutination test (DAT) based on the whole parasite antigen, have been validated i…	2018	2021-03-01	PLoS Negl Trop Dis	12 (3) (no pagination)	e0006277		621575634	http://dx.doi.org/10.1371/journal.pntd.0006277	Bangert 2018
Trypanothione synthetase confers growth, survival advantage and resistance to anti-protozoal drugs in Trypanosoma cruzi	Mesias, A. C.; Sasoni, N.; Arias, D. G.; Perez Brandan, C.; Orban, O. C. F.; Kunick, C.; Robello, C.; Comini, M. A.; Garg, N. J.; Zago, M. P.	BACKGROUND: Chagas cardiomyopathy, caused by Trypanosoma cruzi infection, continues to be a neglected illness, and has a major impact on global health. The parasite undergoes several stages of morphological and biochemical changes during its life cycle, and utilizes an elaborated antioxidant network to overcome the oxidants barrier and establish infection in vector and mammalian hosts. Trypanothi…	2019	1	Free Radical Biology & Medicine	130		23-34	30359758	https://dx.doi.org/10.1016/j.freeradbiomed.2018.10.436	Mesias 2019
Trypanosomatid mitochondrial RNA editing: dramatically complex transcript repertoires revealed with a dedicated mapping tool	Gerasimov, E. S.; Gasparyan, A. A.; Kaurov, I.; Tichy, B.; Logacheva, M. D.; Kolesnikov, A. A.; Lukes, J.; Yurchenko, V.; Zimmer, S. L.; Flegontov, P.	RNA editing by targeted insertion and deletion of uridine is crucial to generate translatable mRNAs from the cryptogenes of the mitochondrial genome of kinetoplastids. This type of editing consists of a stepwise cascade of reactions generally proceeding from 3' to 5' on a transcript, resulting in a population of partially edited as well as pre-edited and completely edited molecules for each mitoc…	2018	01 25	Nucleic Acids Research	46	2	765-781	29220521	https://dx.doi.org/10.1093/nar/gkx1202	Gerasimov 2018
Trypanosoma sp. diversity in Amazonian bats (Chiroptera; Mammalia) from Acre State, Brazil	Dos Santos, F. C. B.; Lisboa, C. V.; Xavier, S. C. C.; Dario, M. A.; Verde, R. S.; Calouro, A. M.; Roque, A. L. R.; Jansen, A. M.	Bats are ancient hosts of Trypanosoma species and their flying ability, longevity and adaptability to distinct environments indicate that they are efficient dispersers of parasites. Bats from Acre state (Amazon Biome) were collected in four expeditions conducted in an urban forest (Parque Zoobotanico) and one relatively more preserved area (Seringal Cahoeira) in Rio Branco and Xapuri municipaliti…	2018	5	Parasitology	145	6	828-837	29144219	https://dx.doi.org/10.1017/S0031182017001834	DosSantos 2018
Trypanosoma madeirae sp. n.: A species of the clade T. cruzi associated with the neotropical common vampire bat Desmodus rotundus	Barros, J. H. S.; Lima, L.; Schubach, A. O.; Teixeira, M. M. G.	Molecular phylogenetic studies have revealed the growing diversity of bat trypanosomes. Here, 14 isolates from blood samples of the vampire bat Desmodus rotundus (Phyllostomidae) from Rio de Janeiro, Southeast Brazil, were cultivated, and morphologically and molecularly characterized. All isolates represent a novel species named Trypanosoma madeirae n. sp. positioned in the Neobat lineage of the …	2019	April	International Journal for Parasitology: Parasites and Wildlife	8		71-81	2001446296	http://dx.doi.org/10.1016/j.ijppaw.2018.12.009	Barros 2019
Trypanosoma Found in Synanthropic Mammals from Urban Forests of Parana, Southern Brazil	Drozino, R. N.; Otomura, F. H.; Gazarini, J.; Gomes, M. L.; Toledo, M. J. O.	Trypanosoma cruzi is a parasitic protozoan that infects a diversity of hosts constituting the cycle of enzootic transmission in wild environments and causing disease in humans (Chagas disease) and domestic animals. Wild mammals constitute natural reservoirs of this parasite, which is transmitted by hematophagous kissing bugs of the family Reduviidae. T. cruzi is genetically subdivided into six di…	2019	2026-06-01		26		26	31241422	https://dx.doi.org/10.1089/vbz.2018.2433	Drozino 2019
Trypanosoma cruzi-specific IFN-gamma-producing cells in chronic Chagas disease associate with a functional IL-7/IL-7R axis	Natale, M. A.; Cesar, G. A.; Alvarez, M. G.; Castro Eiro, M. D.; Lococo, B.; Bertocchi, G.; Albareda, M. C.; Laucella, S. A.	Background: The severity of cardiac disease in chronic Chagas disease patients is associated with different features of T-cell exhaustion. Here, we assessed whether the ability of T cells to secrete IFN-gamma in response to T. cruzi was linked to disruption in immune homeostasis and inflammation in patients with chronic Chagas disease. Methodology/Principal findings: PBMCs from chronic Chagas dis…	2018	December	PLoS Negl Trop Dis	12 (12) (no pagination)	e0006998		625753786	http://dx.doi.org/10.1371/journal.pntd.0006998	Natale 2018
Trypanosoma cruzi: Inhibition of infection of human monocytes by aspirin	Carvalho de Freitas, R.; Lonien, S. C. H.; Malvezi, A. D.; Silveira, G. F.; Wowk, P. F.; da Silva, R. V.; Yamauchi, L. M.; Yamada-Ogatta, S. F.; Rizzo, L. V.; Bordignon, J.; Pinge-Filho, P.	Cell invasion by Trypanosoma cruzi and its intracellular replication are essential for progression of the parasite life cycle and development of Chagas disease. Prostaglandin E2 (PGE<sub>2</sub>) and other eicosanoids potently modulate host response and contribute to Chagas disease progression. In this study, we evaluated the effect of aspirin (ASA), a non-selective cyclooxygenase (COX) inhibitor…	2017	Nov	Experimental Parasitology	182		26-33	28939444	https://dx.doi.org/10.1016/j.exppara.2017.09.019	CarvalhodeFreitas 2017
Trypanosoma cruzi: analysis of two different strains after piplartine treatment	Vieira, G. A. L.; Silva, Mtad; Regasini, L. O.; Cotinguiba, F.; Laure, H. J.; Rosa, J. C.; Furlan, M.; Cicarelli, R. M. B.	The hemoflagellate protozoan, Trypanosoma cruzi, mainly transmitted by triatomine insects through blood transfusion or from mother-to-child, causes Chagas' disease. This is a serious parasitic disease that occurs in Latin America, with considerable social and economic impact. Nifurtimox and benznidazole, drugs indicated for treating infected persons, are effective in the acute phase, but poorly e…	2018	May - Jun	Brazilian Journal of Infectious Diseases	22	3	208-218	29879424	https://dx.doi.org/10.1016/j.bjid.2018.02.009	Vieira 2018
Trypanosoma cruzi XRNA granules colocalise with distinct mRNP granules at the nuclear periphery	Costa, J. F. D.; Ferrarini, M. G.; Nardelli, S. C.; Goldenberg, S.; Avila, A. R.; Holetz, F. B.	BACKGROUND Eukaryotic ribonucleoprotein (RNP) granules are important for the regulation of RNA fate. RNP granules exist in trypanosomatids; however, their roles in controlling gene expression are still not understood. XRNA is a component of granules in Trypanosoma brucei but has not been investigated in Trypanosoma cruzi. OBJECTIVES This study aimed to investigate the TcXRNA dynamic assembly and …	2018		Mem Inst Oswaldo Cruz	113	6	e170531	29924141	https://dx.doi.org/10.1590/0074-02760170531	Costa 2018
Trypanosoma cruzi vaccine candidate antigens Tc24 and TSA-1 recall memory immune response associated with HLA-A and -B supertypes in Chagasic chronic patients from Mexico	Villanueva-Lizama, L. E.; Cruz-Chan, J. V.; Aguilar-Cetina, A. D. C.; Herrera-Sanchez, L. F.; Rodriguez-Perez, J. M.; Rosado-Vallado, M. E.; Ramirez-Sierra, M. J.; Ortega-Lopez, J.; Jones, K.; Hotez, P.; Bottazzi, M. E.; Dumonteil, E.	Trypanosoma cruzi antigens TSA-1 and Tc24 have shown promise as vaccine candidates in animal studies. We evaluated here the recall immune response these antigens induce in Chagasic patients, as a first step to test their immunogenicity in humans. We evaluated the in vitro cellular immune response after stimulation with recombinant TSA-1 (rTSA-1) or recombinant Tc24 (rTc24) in mononuclear cells of…	2018	1		12	1	e0006240	29377898	https://dx.doi.org/10.1371/journal.pntd.0006240	Villanueva-Lizama 2018
Trypanosoma cruzi tryparedoxin II interacts with different peroxiredoxins under physiological and oxidative stress conditions	Dias, L.; Peloso, E. F.; Leme, A. F. P.; Carnielli, C. M.; Pereira, C. N.; Werneck, C. C.; Guerrero, S.; Gadelha, F. R.	Trypanosoma cruzi, the etiologic agent of Chagas disease, has to cope with reactive oxygen and nitrogen species during its life cycle in order to ensure its survival and infection. The parasite detoxifies these species through a series of pathways centered on trypanothione that depend on glutathione or low molecular mass dithiol proteins such as tryparedoxins. These proteins transfer reducing equ…	2018	Jan	Experimental Parasitology	184		2021-10-01	29162347	https://dx.doi.org/10.1016/j.exppara.2017.10.015	Dias 2018
Trypanosoma cruzi trans-sialidase. A tool for the synthesis of sialylated oligosaccharides	Agusti, R.; Gallo-Rodriguez, C.; de Lederkremer, R. M.	Cells are covered by a complex array of carbohydrates. Among them, sialosides are of key importance in intracellular adhesion, recognition and signaling. The need for structurally diverse sialosides impelled the search for efficient synthetic methods since their isolation from natural sources is a difficult task. The enzymatic approach obviates the need of a chemical synthesis for protecting or p…	2019	2001-06-01	Carbohydrate Research	479		48-58	31132642	https://dx.doi.org/10.1016/j.carres.2019.05.004	Agusti 2019
Trypanosoma cruzi diversity in naturally infected nonhuman primates in Louisiana assessed by deep sequencing of the mini-exon gene	Herrera, C.; Majeau, A.; Didier, P.; Falkenstein, K. P.; Dumonteil, E.	BACKGROUND: Trypanosoma cruzi is a zoonotic pathogen of increasing relevance in the USA, with a growing number of autochthonous cases identified in recent years. The identification of parasite genotypes is key to understanding transmission cycles and their dynamics and consequently human infection. Natural T. cruzi infection is present in captive nonhuman primate colonies in the southern USA._x00…	2019	2001-05-01	Transactions of the Royal Society of Tropical Medicine & Hygiene	113	5	281-286	30452731	https://dx.doi.org/10.1093/trstmh/try119	Herrera 2019
Trypanosoma cruzi Detection in Colombian Patients with a Diagnosis of Esophageal Achalasia	Panesso-Gomez, S.; Pavia, P.; Rodriguez-Mantilla, I. E.; Lasso, P.; Orozco, L. A.; Cuellar, A.; Puerta, C. J.; Mendoza de Molano, B.; Gonzalez, J. M.	Achalasia is a motility disorder of the esophagus that might be secondary to a chronic Trypanosoma cruzi infection. Several studies have investigated esophageal achalasia in patients with Chagas disease (CD) in Latin America, but no related studies have been performed in Colombia. The goals of the present study were to determine the presence of anti-T. cruzi antibodies in patients with esophageal…	2018	3	American Journal of Tropical Medicine & Hygiene	98	3	717-723	29405099	https://dx.doi.org/10.4269/ajtmh.17-0417	Panesso-Gomez 2018
Trypanosoma cruzi circulating among dogs and triatomines in the endemic countryside of the State of Rio Grande do Norte, Brazil	Vicente, T.; Camara, A. C.	Vector transmission of Trypanosoma cruzi occurs in several areas of Brazil, including the northeastern region, and domestic animals can serve as reservoirs of the parasite. The aim of this study was to monitor dogs as domestic reservoirs for infection by T. cruzi, and the main triatomine species involved in parasite transmission in rural areas of municipalities in the State of Rio Grande do Norte…	2019	2027-06-01	Acta Tropica			105067	31255585	https://dx.doi.org/10.1016/j.actatropica.2019.105067	Vicente 2019
Trypanosoma cruzi actins: Expression analysis of actin 2	Vizcaino-Castillo, A.; Osorio-Mendez, J. F.; Rubio-Ortiz, M.; Manning-Cela, R. G.; Hernandez, R.; Cevallos, A. M.	The genome of Trypanosoma cruzi encodes for an expanded number of actins, myosins and actin binding proteins compared to Trypanosoma brucei or Leishmania spp. In T. cruzi only the expression of actin 1 (i.e. conventional actin) and profilin, an actin binding protein, has been described. In this work, the expression of a kinetoplastid-specific actin, named actin 2 (TcAct2; TriTryp Gene ID: TcCLB.5…	2019	2028-05-01	Biochemical & Biophysical Research Communications	513	2	347-353	30961931	https://dx.doi.org/10.1016/j.bbrc.2019.04.007	Vizcaino-Castillo 2019
Trypanosoma cruzi 13C-labeled O-Glycan standards for mass spectrometry	Sheikh, M. O.; Gas-Pascual, E.; Glushka, J. N.; Bustamante, J. M.; Wells, L.; West, C. M.	Trypanosoma cruzi is a protozoan parasite that causes Chagas disease, a debilitating condition that affects over 10 million humans in the American continents. In addition to its traditional mode of human entry via the "kissing bug" in endemic areas, the infection can also be spread in non-endemic countries through blood transfusion, organ transplantation, eating food contaminated with the parasit…	2019	04 01	Glycobiology	29	4	280-284	30649355	https://dx.doi.org/10.1093/glycob/cwy111	Sheikh 2019
TrypanocidalActivity of Natural Sesquiterpenoids Involves Mitochondrial Dysfunction, ROS Production and Autophagic Phenotype in Trypanosomacruzi	Bombaca, A. C. S.; Dossow, D. V.; Barbosa, J. M. C.; Paz, C.; Burgos, V.; Menna-Barreto, R. F. S.	Chagas disease is a neglected tropical disease that is caused by the protozoan Trypanosomacruzi and represents a serious health problem, especially in Latin America. The clinical treatment of Chagas disease is based on two nitroderivatives that present severe side effects and important limitations. In folk medicine, natural products, including sesquiterpenoids, have been employed for the treatmen…	2018	2028-10-01	Molecules	23	11	28	30373326	https://dx.doi.org/10.3390/molecules23112800	Bombaca 2018
Trypanocidal and toxicological assessment in vitro and in silico of three sesquiterpene lactones from Asteraceae plant species	Sepulveda-Robles, O.; Espinoza-Gutierrez, B.; Gomez-Verjan, J. C.; Guzman-Gutierrez, S. L.; De Ita, M.; Silva-Miranda, M.; Espitia-Pinzon, C. I.; Fernandez-Ramirez, F.; Herrera-Salazar, A.; Mata-Rocha, M.; Ortega-Hernandez, A.; Reyes-Chilpa, R.	We report the effect of the Sesquiterpene Lactones Ambrosin, Incomptine B and Glaucolide E against seven strains of Trypanosoma cruzi, the etiological agent of Chagas Disease. These compounds were isolated from Parthenium hysterophorus, Decachaeta incompta, and Vernonia liatroides, respectively. We evaluated by flow cytometry the viability of epimastigotes. Ambrosin was the most effective, then I…	2019	Mar	Food & Chemical Toxicology	125		55-61	30572063	https://dx.doi.org/10.1016/j.fct.2018.12.023	Sepulveda-Robles 2019
Trypanocidal activity of tetradentated pyridine-based manganese complexes is not linked to inactivation of superoxide dismutase	Steverding, D.; Kolosevska, K.; Sanchez-Moreno, M.	Two tetradentated pyridine-based manganese complexes (Cpd2 and Cpd3) were previously reported to inhibit efficiently the growth of Trypanosoma cruzi in vitro and in vivo. Cpd3 was also shown to be a potent inhibitor of trypanosomal iron superoxide dismutase (Fe-SOD) and its trypanocidal activity linked to the inhibition of this enzyme. Here we investigated the anti-trypanosomal activity of the tw…	2018	Sep	Experimental Parasitology	192		2021-05-01	30026114	https://dx.doi.org/10.1016/j.exppara.2018.07.005	Steverding 2018
Trypanocidal activity of copaiba oil and kaurenoic acid does not depend on macrophage killing machinery	Kian, D.; Lancheros, C. A. C.; Assolini, J. P.; Arakawa, N. S.; Veiga-Junior, V. F.; Nakamura, C. V.; Pinge-Filho, P.; Conchon-Costa, I.; Pavanelli, W. R.; Yamada-Ogatta, S. F.; Yamauchi, L. M.	Activity, mechanisms of action, and toxicity of natural compounds have been investigated in a context in which knowledge on which pathway is activated remains crucial to understand the action mechanism of these bioactive substances when treating an infected host. Herein, we showed an ability of copaiba oil and kaurenoic acid to eliminate Trypanosoma cruzi forms by infected macrophages through oth…	2018	Jul	Biomedicine & Pharmacotherapy	103		1294-1301	29864911	https://dx.doi.org/10.1016/j.biopha.2018.04.164	Kian 2018
TRAPP webserver: predicting protein binding site flexibility and detecting transient binding pockets	Stank, A.; Kokh, D. B.; Horn, M.; Sizikova, E.; Neil, R.; Panecka, J.; Richter, S.; Wade, R. C.	The TRAnsient Pockets in Proteins (TRAPP) webserver provides an automated workflow that allows users to explore the dynamics of a protein binding site and to detect pockets or sub-pockets that may transiently open due to protein internal motion. These transient or cryptic sub-pockets may be of interest in the design and optimization of small molecular inhibitors for a protein target of interest. …	2017	07 03	Nucleic Acids Research	45	W1	W325-W330	28431137	https://dx.doi.org/10.1093/nar/gkx277	Stank 2017
Trans-sialidase-based vaccine candidate protects against Trypanosoma cruzi infection, not only inducing an effector immune response but also affecting cells with regulatory/suppressor phenotype	Prochetto, E.; Roldan, C.; Bontempi, I. A.; Bertona, D.; Peverengo, L.; Vicco, M. H.; Rodeles, L. M.; Perez, A. R.; Marcipar, I. S.; Cabrera, G.	Prophylactic and/or therapeutic vaccines have an important potential to control Trypanosoma cruzi (T. cruzi)infection. The involvement of regulatory/suppressor immune cells after an immunization treatment and T. cruzi infection has never been addressed. Here we show that a new trans-sialidase-based immunogen (TSf) was able to confer protection, correlating not only with beneficial changes in effe…	2017	2029-08-01	Oncotarget	8	35	58003-58020	28938533	https://dx.doi.org/10.18632/oncotarget.18217	Prochetto 2017
Toll-like receptor-2 mediates local innate immune response against Trypanosoma cruzi in ex vivo infected human placental chorionic villi explants	Castillo, C.; Munoz, L.; Carrillo, I.; Liempi, A.; Medina, L.; Galanti, N.; Maya, J. D.; Kemmerling, U.	BACKGROUND: Congenital Chagas disease is caused by the protozoan parasite Trypanosoma cruzi that must cross the placental barrier during transmission. The trophoblast constitutes the first tissue in contact with the maternal-blood circulating parasite. Importantly, the congenital transmission rates are low, suggesting the presence of local placental defense mechanisms. On the other hand, the plac…	2017	Dec	Placenta	60		40-46	29208238	https://dx.doi.org/10.1016/j.placenta.2017.10.005	Castillo 2017
Synthesis and Evaluation of the Anticancer and Trypanocidal Activities of Boronic Tyrphostins	Hiller, N. D. J.; Silva, N. A. A. E.; Faria, R. X.; Souza, A. L. A.; Resende, J. A. L. C.; Borges Farias, A.; Correia Romeiro, N.; de Luna Martins, D.	Molecules containing an (cyanovinyl)arene moiety are known as tyrphostins because of their ability to inhibit proteins from the tyrosine kinase family, an interesting target for the development of anticancer and trypanocidal drugs. In the present work, (E)-(cyanovinyl)benzeneboronic acids were synthesized by Knoevenagel condensations without the use of any catalysts in water through a simple prot…	2018	2021-07-18	ChemMedChem	13	14	1395-1404	623099541	http://dx.doi.org/10.1002/cmdc.201800206	Hiller 2018
Synthesis and Characterization of Sialylated Lactose- and Lactulose-Derived Oligosaccharides by Trypanosoma cruzi Trans-sialidase	Pham, H. T. T.; Ten Kate, G. A.; Dijkhuizen, L.; van Leeuwen, S. S.	Sialylated oligosaccharides contribute 12.6-21.9% of total free oligosaccharides in human milk ( hMOS). These acidic hMOS possess prebiotic properties and display antiadhesive effects against pathogenic bacteria. Only limited amounts of sialylated hMOS are currently available. The aim of our work is to enzymatically synthesize sialylated oligosaccharides mimicking hMOS functionality. In this stud…	2019	2027-03-01	Journal of Agricultural & Food Chemistry	67	12	3469-3479	30836749	https://dx.doi.org/10.1021/acs.jafc.8b06974	Pham 2019
Synthesis and characterization of novel potential trypanocidal metallodrug of ruthenium(II)-dithiocarbazate	Santos, R. L. S. R.; Costa, A. R.; Menezes, T. I.; Fernades, A. G. A.	Chagas disease is an endemic illness that affects thousands of people, especially those of low income who live in Latin American countries. Nowadays, only two drugs are available commercially for treatment and even then, their effectiveness is only in the acute phase and can cause serious side effects. In the search for new therapeutic drugs against Trypanosoma cruzi, it was found that pyrazole […	2017	July	Journal of Biological Inorganic Chemistry	22 (1 Supplement 1)		S106	617530041	http://dx.doi.org/10.1007/s00775-017-1475-y	Santos 2017
Synthesis and characterization of alpha-d-Galp-(1->3)-beta-d-Galp epitope-containing neoglycoconjugates for chagas disease serodiagnosis	Lopez, R.; Giorgi, M. E.; Melgarejo, L. T.; Ducrey, I.; Balouz, V.; Gonzalez-Salas, D.; Camara, M. L. M.; Buscaglia, C. A.; de Lederkremer, R. M.; Marino, C.	The immunodominant epitope alpha-d-Galp-(1->3)-beta-d-Galp-(1->4)-d-GlcNAc, expressed in the mucins of the infective trypomastigote stage of Trypanosoma cruzi has been proposed for multiple clinical applications, from serodiagnosis of protozoan caused diseases to xenotransplantation or cancer vaccinology. It was previously shown that the analogue trisaccharide, with glucose in the reducing end in…	2019	2015-05-01	Carbohydrate Research	478		58-67	31096122	https://dx.doi.org/10.1016/j.carres.2019.04.007	Lopez 2019
Synthesis and Biological in vitro and in vivo Evaluation of 2-(5-Nitroindazol-1-yl)ethylamines and Related Compounds as Potential Therapeutic Alternatives for Chagas Disease	Martin-Escolano, R.; Aguilera-Venegas, B.; Marin, C.; Martin-Montes, A.; Martin-Escolano, J.; Medina-Carmona, E.; Aran, V. J.; Sanchez-Moreno, M.	Chagas disease, a neglected tropical disease caused by infection with the protozoan parasite Trypanosoma cruzi, is a potentially life-threatening illness that affects 5-8 million people in Latin America, and more than 10 million people worldwide. It is characterized by an acute phase, which is partly resolved by the immune system, but then develops as a chronic disease without an effective treatm…	2018	10 08	ChemMedChem	13	19	2104-2118	30098232	https://dx.doi.org/10.1002/cmdc.201800512	Martin-Escolano 2018
Synthesis and biological evaluation of new quinoline derivatives as antileishmanial and antitrypanosomal agents	Chanquia, S. N.; Larregui, F.; Puente, V.; Labriola, C.; Lombardo, E.; Garcia Linares, G.	As a part of our project aimed at developing new safe chemotherapeutic agents against tropical diseases, a series of aryl derivatives of 2- and 3-aminoquinoline, some of them new compounds, was designed, synthesized, and evaluated as antiproliferative agents against Trypanosoma cruzi, the parasite responsible for American trypanosomiasis (Chagas' disease), and Leishmania mexicana, the etiological…	2019	Mar	Bioorganic Chemistry	83		526-534	30469145	https://dx.doi.org/10.1016/j.bioorg.2018.10.053	Chanquia 2019
Synthesis and biological evaluation of new long-chain squaramides as anti-chagasic agents in the BALB/c mouse model	Martin-Escolano, R.; Marin, C.; Vega, M.; Martin-Montes, A.; Medina-Carmona, E.; Lopez, C.; Rotger, C.; Costa, A.; Sanchez-Moreno, M.	Chagas Disease is caused by infection with the insect-transmitted protozoan Trypanosoma cruzi and affects more than 10 million people. It is a paradigmatic example of a chronic disease without an effective treatment in Latin America where the current therapies, based on Benznidazole and Nifurtimox, are characterised by limited efficacy, toxic side-effects and frequent failures in the treatment. W…	2019	2001-03-01	Bioorganic & Medicinal Chemistry	27	5	865-879	30728107	https://dx.doi.org/10.1016/j.bmc.2019.01.033	Martin-Escolano 2019
Synthesis and biological evaluation of N-alkyl naphthoimidazoles derived from beta-lapachone against Trypanosoma cruzi bloodstream trypomastigotes	da Silva, A. M.; Araujo-Silva, L.; Bombaca, A. C. S.; Menna-Barreto, R. F. S.; Rodrigues-Santos, C. E.; Buarque Ferreira, A. B.; de Castro, S. L.	The QSAR study of 34 2-aryl-naphthoimidazoles screened so far revealed that sigma<sub>i</sub> is the most important factor for their lytic activity on the bloodstream trypomastigote forms of T. cruzi, the etiologic agent of Chagas disease. Based on this result, 16 new N-alkyl-naphthoimidazoles derived from 6,6-dimethyl-3,4,5,6-tetrahydrobenzo[7,8]chromene[5,6-d]imidazole (the product of the react…	2017	2001-05-01	Medchemcomm	8	5	952-959	30108809	https://dx.doi.org/10.1039/c7md00069c	daSilva 2017
Synthesis and biological evaluation of isoxazolyl-sulfonamides: A non-cytotoxic scaffold active against Trypanosoma cruzi, Leishmania amazonensis and Herpes Simplex Virus	da Rosa, R.; Zimmermann, L. A.; de Moraes, M. H.; Schneider, N. F. Z.; Schappo, A. D.; Simoes, C. M. O.; Steindel, M.; Schenkel, E. P.; Bernardes, L. S. C.	In this study we report the synthesis, characterization, biological evaluation, and druglikeness assessment of a series of 20 novel isoxazolyl-sulfonamides, obtained by a four-step synthetic route. The compounds had their activity against Trypanosoma cruzi, Leishmania amazonensis, Herpes Simplex Virus type 1 and cytotoxicity evaluated in phenotypic assays. All compounds have drug-like properties,…	2018	11 01	Bioorganic & Medicinal Chemistry Letters	28	20	3381-3384	30194008	https://dx.doi.org/10.1016/j.bmcl.2018.08.040	daRosa 2018
Supporting and strengthening research on urban health interventions for the prevention and control of vector-borne and other infectious diseases of poverty: Scoping reviews and research gap analysis	Otmani del Barrio, M.; Simard, F.; Caprara, A.	Background: More than half of the world's population currently lives in urban settlements that grow both in size and number. By 2050, approximately 70% of the global population will be living in urban conglomerations, mainly in low- and middle-income countries. Mobility, poverty, different layers of inequalities as well as climate variability and change are some of the social and environmental fa…	2018	2021-09-03	Infectious Diseases of Poverty	7 (1) (no pagination)	94		623691657	http://dx.doi.org/10.1186/s40249-018-0462-z	OtmanidelBarrio 2018
Study Will Evaluate the Relative Bioavailability, Safety, and Tolerability of Single Doses of Nifurtimox 30 mg Tablets Exhibiting Different in Vitro Dissolution Characteristics, and to Evaluate the Relative Bioavailability of Nifurtimox 30 mg and 120 mg	NCT03350295; Bayer,	Inclusion Criteria - Women and men of reproductive potential must agree to use adequate contraception when sexually active. This applies for the time period between signing of the informed consent form and 12 weeks after the last administration of study drug. The definition of adequate contraception will be based on the judgment of the investigator and on local requirements. Acceptable methods of…	2017								NCT03350295 2017
The strong hearts pilot: Results of a primary-care screening program for trypanosoma cruzi in East Boston, Massachusetts	Manne-Goehler, J.; Perez, J. H.; Barnett, E.; Kohler, J. R.	The United States is home to approximately 300,000 people who are infected with Trypanosoma cruzi, though less than 1% of those infected have been treated with benznidazole or nifurtimox. We designed and are implementing a screening program for Chagas disease in East Boston, Massachusetts. The aim of this study is to describe the results of a pilot to integrate Chagas disease screening and referr…	2017	November	American Journal of Tropical Medicine and Hygiene	97 (5 Supplement 1)		382	620730990		Manne-Goehler 2017
Zika virus outbreak-assisted reproduction patients should avoid pregnancy?	Ono, E.; Braga, D. P. A. F.; Setti, A. S.; Iaconelli, A.; Borges, E.	Study question: Women should avoid pregnancy, because of the current Zika virus (ZIKV) outbreak, as recommended by public health authorities and government leaders of some countries? Summary answer: ZIKV infection risk deserves special attention; however infection with ZIKV during pregnancy does not lead to increased risks than any other previously known pathogens. What is known already: Zika vir…	2017	July	Human Reproduction	32 (Supplement 1)		i277	617484596		Ono 2017
Youth participatory research and evaluation to inform a Chagas disease prevention program in Ecuador	Marco-Crespo, B.; Casapulla, S.; Nieto-Sanchez, C.; Urrego, J. G. G.; Grijalva, M. J.	This qualitative study engaged a group of young people in participatory research and evaluation activities in order to study to what extent engaging youth in health interventions can inform research and evaluation processes. We applied a youth participatory research and evaluation approach (PRE) to inform research and evaluation on the impact of a Chagas disease control program in southern Ecuado…	2018	2021-08-01	Evaluation and program planning	69		99-108	624684120	http://dx.doi.org/10.1016/j.evalprogplan.2018.04.009	Marco-Crespo 2018
A yearly review of NDAs: 2017	Lad, A.; Christian, S.; Sant, H.; Joshi, H. N.		2018		Pharmaceutical Outsourcing	19	3		622418886		Lad 2018
Ximenia americana L. enhances the antibiotic activity and inhibit the development of kinetoplastid parasites	de Menezes, I. R. A.; da Costa, R. H. S.; Augusti Boligon, A.; Rolon, M.; Coronel, C.; Vega, C.; Melo Coutinho, H. D.; da Costa, M. S.; Tintino, S. R.; Silva Pereira, R. L.; de Albuquerque, T. R.; da Silva Almeida, J. R. G.; Quintans-Junior, L. J.	OBJECTIVE: The objective of this work was evaluate the cytotoxic, leishmanicidal and tripanocidal activity, as well as to evaluate its antimicrobial and modulatory activity in association with different antibiotics of the hydroethanolic extract of the Ximenia Americana stem bark (EHXA)._x000D_METHOD: In vitro tests against Trypanosoma cruzi, Leishmania sp. and citotoxicity were performed. The eva…	2019	Jun	Comparative Immunology, Microbiology & Infectious Diseases	64		40-46	31174698	https://dx.doi.org/10.1016/j.cimid.2019.02.007	deMenezes 2019
Work-related Trypanosoma cruzi Exposures	Budnick, L. D.; Bocco, B. W.; Montgomery, S. P.		2019	2016-07-01	Journal of Occupational & Environmental Medicine	16		16	31348429	https://dx.doi.org/10.1097/JOM.0000000000001674	Budnick 2019
Wing geometry of Triatoma sordida (Hemiptera: Reduviidae) populations from Brazil	Vendrami, D. P.; Obara, M. T.; Gurgel-Goncalves, R.; Ceretti-Junior, W.; Marrelli, M. T.	Triatoma sordida has a widespread distribution in Argentina, Bolivia, Brazil, Paraguay, and Uruguay and is frequently found in peridomestic environments. We investigated size and shape variability of T. sordida wings across Brazil. Field-collected adults from twelve populations were studied. For each individual female, seven landmarks on the right wing were digitalized. Shape variables derived fr…	2017	4	Infection, Genetics & Evolution	49		17-20	28040563	https://dx.doi.org/10.1016/j.meegid.2016.12.031	Vendrami 2017
Wide QRS complex tachycardia in patient with Chagas disease: Sustained ventricular tachycardia until proven otherwise	Cury Megid, T. B.; Palmegiani, E.; Lorga-Filho, A. M.	Algorithms used for the differential diagnosis of wide QRS complex tachycardia are extremely important in clinical practice, but they have limitations and should be applied with caution. We describe a case of a patient with positive serology for Chagas disease and normal echocardiogram who presented an episode of wide QRS complex tachycardia. It was initially diagnosed as sustained ventricular ta…	2018	September - October	Journal of Electrocardiology	51	5	756-759	2000928424	http://dx.doi.org/10.1016/j.jelectrocard.2018.06.003	CuryMegid 2018
Whole genome sequencing of Trypanosoma cruzi field isolates reveals extensive genomic variability and complex aneuploidy patterns within TcII DTU	Reis-Cunha, J. L.; Baptista, R. P.; Rodrigues-Luiz, G. F.; Coqueiro-Dos-Santos, A.; Valdivia, H. O.; de Almeida, L. V.; Cardoso, M. S.; D'Avila, D. A.; Dias, F. H. C.; Fujiwara, R. T.; Galvao, L. M. C.; Chiari, E.; Cerqueira, G. C.; Bartholomeu, D. C.	BACKGROUND: Trypanosoma cruzi, the etiologic agent of Chagas disease, is currently divided into six discrete typing units (DTUs), named TcI-TcVI. TcII is among the major DTUs enrolled in human infections in South America southern cone, where it is associated with severe cardiac and digestive symptoms. Despite the importance of TcII in Chagas disease epidemiology and pathology, so far, no genome-w…	2018	2013-11-01	BMC Genomics	19	1	816	30424726	https://dx.doi.org/10.1186/s12864-018-5198-4	Reis-Cunha 2018
Who do we gain? Enhancement of blood supplies by additional testing for donors who travel	Reynolds, C. A.; Cieply, L.; Sell, J.; Brailsford, S. R.	AIMS/OBJECTIVES: To describe the impact of additional testing on the England blood supply._x000D_BACKGROUND: The blood service for England, NHS Blood and Transplant, applies a system of deferral and testing to donors with potential exposure to Chagas disease, malaria and West Nile virus; however, testing costs must be justified. Here, we describe the donations and donors gained by testing._x000D_…	2019	2025-07-01	Transfusion Medicine	25		25	31347219	https://dx.doi.org/10.1111/tme.12620	Reynolds 2019
Who benefits from cellular immune response during the Chagas disease?	Vega-Royero, S. P.; Sibona, G. J.	We extend our previous model for the dynamical interaction between a mammal's immune response and the Trypanosoma cruzi parasite during the acute phase of Chagas disease. The model here considers both humoral and cellular responses and the different stages of T. cruzi (intracellular and extracellular phases) inside the mammal host. We analyze the dynamical time evolution of the populations obtain…	2018	Sep	BioSystems	171		66-73	30055256	https://dx.doi.org/10.1016/j.biosystems.2018.07.005	Vega-Royero 2018
What do the numbers tell us about the temporal evolution of Chagas' disease?. [Spanish]	Canals, M.; Gonzalez, C.; Canals, L.; Canals, A.; Caceres, D.; Alvarado, S.; Cattan, P. E.; Saavedra, M.; Zulantay, I.; Apt, W.		2017	2021-04-01	Revista chilena de infectologia : organo oficial de la Sociedad Chilena de Infectologia	34	2	120-127	617566642	http://dx.doi.org/10.4067/S0716-10182017000200004	Canals 2017
Water ingestion dynamics in patients with achalasia: Influence of sex and age	Dantas, R. O.; Cassiani, R. A.; Santos, C. M.; Alves, L. M. T.	Background - Achalasia is a disease that affects esophageal bolus transit due to the absence of esophageal peristaltic contractions and impaired or absent relaxation of the lower esophageal sphincter. Objective - The objective of this investigation was: a) to evaluate the dynamics of water ingestion in patients with achalasia, idiopathic or caused by Chagas' disease; b) to evaluate the influence …	2018	November	Arquivos de Gastroenterologia	55	Supplement 1	25-29	625451822	http://dx.doi.org/10.1590/s0004-2803.201800000-43	Dantas 2018
Vitamin D supplementation for women during pregnancy	Palacios, C.; Kostiuk, L. K.; PeÃ±aâ€Rosas, J. P.	- Background Vitamin D supplementation during pregnancy may be needed to protect against adverse pregnancy outcomes. This is an update of a review that was first published in 2012 and then in 2016. Objectives To examine whether vitamin D supplementation alone or in combination with calcium or other vitamins and minerals given to women during pregnancy can safely improve maternal and neonatal outc…	2019		Cochrane Database of Systematic Reviews		7		CD008873	10.1002/14651858.CD008873.pub4	Palacios 2019
Virtual and experimental screening of phenylfuranchalcones as potential anti-Leishmania candidates	Ochoa, R.; Garcia, E.; Robledo, S. M.; Cardona, G. W.	Discovery of novel or repurposed chemical treatments for leishmaniasis is a priority given the limited number of therapeutic alternatives available. One way to accelerate the finding is by implementing virtual screening methodologies using structural information, with subsequent experimental validations. Here we tested a library of 48 phenylfuranchalcones as anti-Leishmania agents that can be ass…	2019	September	Journal of Molecular Graphics and Modelling	91		164-171		http://dx.doi.org/10.1016/j.jmgm.2019.06.015	Ochoa 2019
Vimentin and Anti Vimentin Antibodies in Chagas' Disease	Nascimento, M. S.; Stolf, A. M. S.; Andrade Junior, H. F.; Pandey, R. P.; Umezawa, E. S.	BACKGROUND: Vimentin is a main structural protein of the cell, a component of intermediate cell filaments and immersed in cytoplasm. Vimentin is mimicked by some bacterial proteins and anti-vimentin antibodies occur in autoimmune cardiac disease, as rheumatic fever. In this work we studied vimentin distribution on LLC-MK2 cells infected with T. cruzi and anti-vimentin antibodies in sera from seve…	2018	Apr	Arquivos Brasileiros de Cardiologia	110	4	348-353	29538505	https://dx.doi.org/10.5935/abc.20180038	Nascimento 2018
Use of Tc-rCRP as a target for lytic antibody titration after experimental Trypanosoma cruzi infection	Marques, T.; Silva, G. C.; Henrique Paiva, P. M.; Nascentes, G. A. N.; Ramirez, L. E.; Norris, K.; Meira, W. S. F.	Experimental Chagas disease has been used as a model to identify several host/parasite interaction factors involved in immune responses to Trypanosoma cruzi infection. One of the factors inherent to this parasite is the complement regulatory protein (Tc-CRP), a major epitope that induces production of lytic antibodies during T. cruzi infections. Previous studies have evaluated the function of Tc-…	2018	Jan	Experimental Parasitology	184		103-108	29246832	https://dx.doi.org/10.1016/j.exppara.2017.12.003	Marques 2018
The use of Sulfonamide Derivatives in the Treatment of Trypanosomatid Parasites, Including Trypanosoma cruzi, Trypanosoma brucei, and Leishmania ssp	Scarim, C. B.; Chelucci, R. C.; Dos Santos, J. L.; Chin, C. M.	More than 10 million people around the world are afflicted by Neglected Tropical Diseases, such as Chagas Disease, Human African trypanosomiasis, and Leishmania. These diseases mostly occur in undeveloped countries that suffer from a lack of economic incentive, research, and policy for new compound development. Sulfonamide moieties are effective scaffolds present in several compounds that are det…	2019	2020-06-01	Medicinal chemistry	20		20	31218962	https://dx.doi.org/10.2174/1573406415666190620141109	Scarim 2019
Use of screening echocardiography to improve healthcare in underserved areas of Brazil: Data from the provar+ study	Diamantino, A. C.; Nunes, M. C. P.; Sable, C.; Nascimento, B. R.; Lima, E. M.; Martins, L. N.; Colossimo, E. A.; Diamantino, T. C.; Rezende, B. D.; Rios, J. P. P.; Beaton, A. Z.; Ribeiro, A. L. P.	Introduction: Access to public health care is limited in Brazil, especially in remote areas and many patients remain on long waiting lists for echocardiography (echo). Advances in handheld echo and telemedicine provide an opportunity for integration of screening for cardiovascular disease into the existing primary care system. This may improve early detection of heart disease (HD) and guide prior…	2018		Circulation. Conference	138	Supplement 1		626956438		Diamantino 2018
The use of laser-based diagnostics for the rapid identification of infectious agents in human blood	Multari, R. A.; Cremers, D. A.; Nelson, A.; Karimi, Z.; Young, S.; Fisher, C.; Duncan, R.	Aims: To investigate the use of a laser-based method of detection as a potential diagnostic test for the rapid identification of infectious agents in human blood. Methods and Results: In this study, the successful differentiation of blood spiked with viruses, bacteria or protozoan parasites to clinically relevant levels is demonstrated using six blood types (O+, O-, AB+, A+, A-, B+) using blood f…	2019	May	Journal of Applied Microbiology	126	5	1606-1617	626841818	http://dx.doi.org/10.1111/jam.14222	Multari 2019
Use of chitosan microparticles to capture and concentrate trypanosoma cruzi DNA in urine of experimentally infected Guinea pigs	Jahuira-Arias, M. H.; Pando, A.; Acosta, J.; Arocutipa, E.; Castro-Sesquen, Y.; Cconislla, J.; Maza, I.; Jacinto, C.; Valderrama, A.; Mayta, H.	Chagas disease is a neglected tropical disease, caused by the protozoan Trypanosoma cruzi, which is a major public health problem in Latin America and a potentially serious emerging globally. Detection of T. cruzi DNA in urine has been demonstrated before but has low sensitivity due because of the dilution effect of molecules in urine, DNA degradation and presence of PCR inhibitors. In recent yea…	2017	November	American Journal of Tropical Medicine and Hygiene	97 (5 Supplement 1)		381	620730924		Jahuira-Arias 2017
US Gulf Coast states: The rise of neglected tropical diseases in "flyover nation"	Hotez, P. J.; Jackson Lee, S.		2017	2021-11-16	PLoS Negl Trop Dis	11 (11) (no pagination)	e0005744		619495006	http://dx.doi.org/10.1371/journal.pntd.0005744	Hotez 2017
Uptake of l-Alanine and Its Distinct Roles in the Bioenergetics of Trypanosoma cruzi	Girard, Rmbm; Crispim, M.; Alencar, M. B.; Silber, A. M.	Amino acids participate in several critical processes in the biology of trypanosomatids, such as osmoregulation, cell differentiation, and host cell invasion. Some of them provide reducing power for mitochondrial ATP synthesis. It was previously shown that alanine, which is formed mainly by the amination of pyruvate, is a metabolic end product formed when parasites are replicating in a medium ric…	2018	07 18	Msphere	3	4	18	30021880	https://dx.doi.org/10.1128/mSphereDirect.00338-18	Girard 2018
UPLC-ESI-QTOF-MS<sup>2</sup> characterisation of Cola nitida resin fractions with inhibitory effects on NO and TNF-alpha released by LPS-activated J774 macrophage and on Trypanosoma cruzi and Leishmania amazonensis	Frankenberger, L.; D. Mora T; de Siqueira, C. D.; Filippin-Monteiro, F. B.; de Moraes, M. H.; Biavatti, M. W.; Steindel, M.; Sandjo, L. P.	Introduction: The resin of Cola nitida is used in western Cameroon as incense for spiritual protection and during ritual ceremonies. This plant secretion has never been investigated although previous chemical and biological studies on other resins have drawn many attentions. Objective(s): The resin fractions which revealed inhibitory effect on nitric oxide (NO) and tumour necrosis factor alpha (T…	2018	November/December	Phytochemical Analysis	29	6	577-589	622387823	http://dx.doi.org/10.1002/pca.2771	Frankenberger 2018
An updated and illustrated dichotomous key for the Chagas disease vectors of Triatomabrasiliensis species complex and their epidemiologic importance	Dale, C.; Almeida, C. E.; Endonca, V. J.; Oliveira, J.; da Osa, J. A.; Galvao, C.; Costa, J.	In the subfamily Triatominae, Triatoma exhibits the largest number of species, which are arranged in complexes. For the T.brasiliensis species complex, recent investigations based on results of geometric morphometrics combined with phylogeny have provided evidence that it should be composed of seven species: T.brasiliensis, T.bahiensis, T.juazeirensis, T.lenti, T.melanica, T.petrocchiae, and T.sh…	2018		ZooKeys		805	33-43	30588153	https://dx.doi.org/10.3897/zookeys.805.25559	Dale 2018
Update on drug development targeting parasite cysteine proteases	McKerrow, J. H.		2018	August	PLoS Negl Trop Dis	12 (8) (no pagination)	e0005850		624297375	http://dx.doi.org/10.1371/journal.pntd.0005850	McKerrow 2018
Unveiling the partners of the DRBD2-mRNP complex, an RBP in Trypanosoma cruzi and ortholog to the yeast SR-protein Gbp2	Wippel, H. H.; Malgarin, J. S.; Inoue, A. H.; Leprevost, F. D. V.; Carvalho, P. C.; Goldenberg, S.; Alves, L. R.	BACKGROUND: RNA-binding proteins (RBPs) are well known as key factors in gene expression regulation in eukaryotes. These proteins associate with mRNAs and other proteins to form mRNP complexes that ultimately determine the fate of target transcripts in the cell. This association is usually mediated by an RNA-recognition motif (RRM). In the case of trypanosomatids, these proteins play a paramount …	2019	2011-06-01	BMC Microbiology	19	1	128	31185899	https://dx.doi.org/10.1186/s12866-019-1505-8	Wippel 2019
An Unusual Suspect in a Case of Left Ventricular Aneurysm	Babb, D. E.; Vera-Arroyo, A.; Rodriquez-Blanco, Y.; Fabbro, M.	True left ventricular aneurysms are most frequently seen after acute transmural myocardial infarction. These aneurysms are distinct from apical left ventricular pseudoaneurysms, which can also be seen in ischemia, and have a different treatment course. A major dilemma for clinicians is using echocardiographic information to make this distinction. Coronary angiography aids in this distinction; how…	2019	August	Journal of Cardiothoracic and Vascular Anesthesia	33	8	2344-2348	2001507912	http://dx.doi.org/10.1053/j.jvca.2019.01.016	Babb 2019
Unraveling Chagas disease transmission through the oral route: Gateways to Trypanosoma cruzi infection and target tissues	Silva-dos-Santos, D.; Barreto-de-Albuquerque, J.; Guerra, B.; Moreira, O. C.; Berbert, L. R.; Ramos, M. T.; Mascarenhas, B. A. S.; Britto, C.; Morrot, A.; Serra Villa-Verde, D. M.; Garzoni, L. R.; Savino, W.; Cotta-de-Almeida, V.; Meis, J. D.	Oral transmission of Trypanosoma cruzi, the causative agent of Chagas disease, is the most important route of infection in Brazilian Amazon and Venezuela. Other South American countries have also reported outbreaks associated with food consumption. A recent study showed the importance of parasite contact with oral cavity to induce a highly severe acute disease in mice. However, it remains uncerta…	2017	2021-04-05	PLoS Negl Trop Dis	11 (4) (no pagination)	e0005507		615947440	http://dx.doi.org/10.1371/journal.pntd.0005507	Silva-dos-Santos 2017
Unique Characteristics of the Parasite Polyamine Pathway	Pegg, A. E.	A critical function of spermidine is in the formation of hypusine, an essential post-translational modification of eukaryotic initiation factor eIF5A. In this issue of Structure, Afandor et al. (2018) determine the crystal structure of trypanosomal deoxyhypusine synthase, which shows that gene duplication and subsequent mutations provide significant differences from the mammalian equivalent explo…	2018	2021-11-06	Structure	26	11	1427-1429	2001229737	http://dx.doi.org/10.1016/j.str.2018.10.018	Pegg 2018
Undiagnosed Chagas disease is causing sudden cardiac deaths, warns American Heart Association	Dyer, O.		2018	2028-08-01	BMJ	362		k3658	30154189	https://dx.doi.org/10.1136/bmj.k3658	Dyer 2018
Understanding Structure-Activity Relationships for Trypanosomal Cysteine Protease Inhibitors by Simulations and Free Energy Calculations	Santos, L. H.; Waldner, B. J.; Fuchs, J. E.; Pereira, G. A. N.; Liedl, K. R.; Caffarena, E. R.; Ferreira, R. S.	The protozoan cysteine proteases cruzain in Trypanosoma cruzi and rhodesain in Trypanosoma brucei are therapeutic targets for Chagas disease and Human African Trypanosomiasis (HAT), respectively. A benzimidazole series was previously characterized as potent noncovalent competitive cruzain and rhodesain inhibitors with activity against trypanosomes. Common structure-activity relationships (SAR) tr…	2019	2028-01-01	Journal of Chemical Information & Modeling	59	1	137-148	30532974	https://dx.doi.org/10.1021/acs.jcim.8b00557	Santos 2019
Underestimated burden: Non-communicable diseases in north korea	Ha, S.; Lee, Y. H.	There remains a misperception that non-communicable diseases (NCDs) are predominantly an issue for developed countries and are not major public health problems in low-income countries. North Korea is also often considered as a country with a disease structure that is typical of a low-income country. Infectious diseases and nutritional problems, including tuberculosis and pneumonia, are still majo…	2019	May	Yonsei Medical Journal	60	5	481-483	2001949318	http://dx.doi.org/10.3349/ymj.2019.60.5.481	Ha 2019
Uncovering vector, parasite, blood meal and microbiome patterns from mixed-DNA specimens of the Chagas disease vector Triatoma dimidiata	Orantes, L. C.; Monroy, C.; Dorn, P. L.; Stevens, L.; Rizzo, D. M.; Morrissey, L.; Hanley, J. P.; Rodas, A. G.; Richards, B.; Wallin, K. F.; Helms Cahan, S.	Chagas disease, considered a neglected disease by the World Health Organization, is caused by the protozoan parasite Trypanosoma cruzi, and transmitted by >140 triatomine species across the Americas. In Central America, the main vector is Triatoma dimidiata, an opportunistic blood meal feeder inhabiting both domestic and sylvatic ecotopes. Given the diversity of interacting biological agents invo…	2018	10		12	10	e0006730	30335763	https://dx.doi.org/10.1371/journal.pntd.0006730	Orantes 2018
Species Diversity and Abundance of Anopheles (Nyssorhynchus) (Diptera: Culicidae) in Cachoeiras de Macacu Municipality, Rio de Janeiro State: An Area of the Atlantic Forest Receptive and Vulnerable to Malaria	Jules, J. R.; Albuquerque, H. G.; Suarez-Mutis, M. C.; Pereira de Oliveira, S. M.; Gil-Santana, H. R.; Rodrigues, W.; Alencar, J.	The present study evaluated the diversity of Anopheles Meigen, 1818 belonging to the subgenus Nyssorhynchus Blanchard, 1902 in four areas of Cachoeiras de Macacu municipality, Rio de Janeiro, Brazil. The immature collections were carried out during a rainy period and a post-rainy season. During the two periods, 3,932 specimens of Anopheles (Nyssorhynchus) were collected: 562 in the rainy period (…	2019	2016-04-01	Journal of medical entomology	56	3	849-858	30649408	https://dx.doi.org/10.1093/jme/tjy236	Jules 2019
Trypanosoma cruzi trans-sialidase alternative substrates: Study of the effect of substitution in C-6 in benzyl beta-lactoside	Morrone-Pozzuto, P.; Uhrig, M. L.; Agusti, R.	Trypanosoma cruzi trans-sialidase (TcTS) is a cell surface protein that participates in the adhesion and invasion mechanisms of the parasite into the host cells, making it an attractive target for inhibitors design. In order to contribute to the knowledge of the interaction between TcTS and their acceptor substrates, we designed and synthesized a library of 20 benzyl lactosides substituted in C-6…	2019	2015-05-01	Carbohydrate Research	478		33-45	31054381	https://dx.doi.org/10.1016/j.carres.2019.04.003	Morrone-Pozzuto 2019
Trypanosoma cruzi transcriptome during axenic epimastigote growth curve	Santos, Cmbd; Ludwig, A.; Kessler, R. L.; Rampazzo, R. C. P.; Inoue, A. H.; Krieger, M. A.; Pavoni, D. P.; Probst, C. M.	BACKGROUND Trypanosoma cruzi is an important protozoan parasite and the causative agent of Chagas disease. A critical step in understanding T. cruzi biology is the study of cellular and molecular features exhibited during its growth curve. OBJECTIVES We aimed to acquire a global view of the gene expression profile of T. cruzi during epimastigote growth.	2018		Mem Inst Oswaldo Cruz	113	5	e170404	29668769	https://dx.doi.org/10.1590/0074-02760170404	Santos 2018
Trypanosoma cruzi surface mucins are involved in the attachment to the Triatoma infestans rectal ampoule	Camara, M. L. M.; Balouz, V.; Centeno Camean, C.; Cori, C. R.; Kashiwagi, G. A.; Gil, S. A.; Macchiaverna, N. P.; Cardinal, M. V.; Guaimas, F.; Lobo, M. M.; de Lederkremer, R. M.; Gallo-Rodriguez, C.; Buscaglia, C. A.	BACKGROUND: Trypanosoma cruzi, the agent of Chagas disease, is a protozoan parasite transmitted to humans by blood-sucking triatomine vectors. However, and despite its utmost biological and epidemiological relevance, T. cruzi development inside the digestive tract of the insect remains a poorly understood process._x000D_METHODS/PRINCIPLE FINDINGS: Here we showed that Gp35/50 kDa mucins, the major…	2019	May		13	5	e0007418	31107901	https://dx.doi.org/10.1371/journal.pntd.0007418	Camara 2019
Trypanosoma cruzi specific mRNA amplification by in vitro transcription improves parasite transcriptomics in host-parasite RNA mixtures	Kessler, R. L.; Pavoni, D. P.; Krieger, M. A.; Probst, C. M.	Background: Trypanosomatids are a group of protozoan parasites that includes the etiologic agents of important human illnesses as Chagas disease, sleeping sickness and leishmaniasis. These parasites have a significant distinction from other eukaryotes concerning mRNA structure, since all mature mRNAs have an identical species-specific sequence of 39 nucleotides at the 5' extremity, named spliced …	2017	2021-10-16	BMC Genomics	18 (1) (no pagination)	793		618780214	http://dx.doi.org/10.1186/s12864-017-4163-y	Kessler 2017
Trypanosoma cruzi seroprevalence among solid organ donors in Ceara State, Brazil	Da Costa, A. C.; Da Silva Filho, J. D.; Rocha, E. A.; Andrade, M. C.; Fidalgo, A. S. O. B. V.; Almeida, E. R. B.; Viana, C. E. M.; Freitas, E. C.; Coelho, I. C. B.; Oliveira, M. F.	Introduction: The transmission of Chagas disease (CD) through blood transfusion, organ transplantation, and oral transmission has gained greater visibility as a result of intensified vector control activities in endemic regions and to control CD in nonendemic regions. In Brazil, Ceara is one of the states that perform the most organ transplants. Therefore, the objective of this study was to asses…	2018	September-October	Rev Soc Bras Med Trop	51	5	616-621	624513342	http://dx.doi.org/10.1590/0037-8682-0406-2017	DaCosta 2018
Trypanosoma cruzi serinecarboxipeptidase is a sulfated glycoprotein and a minor antigen in human Chagas disease infection	Soprano, L. L.; Parente, J. E.; Landoni, M.; Couto, A. S.; Duschak, V. G.	In this work, the presence of sulfated N-glycans was studied in a high-mannose-type glycoprotein of Trypanosoma cruzi with serinecarboxipeptidase (TcSCP) activity. The immune cross-reactivity between purified SCP and Cruzipain (Cz) was evidenced using rabbit sera specific for both glycoproteins. Taking advantage that SCP co-purifies with Cz from Concanavalin-A affinity columns, the Cz-SCP mixture…	2018	Apr	Medical Microbiology & Immunology	207	2	117-128	29274017	https://dx.doi.org/10.1007/s00430-017-0529-7	Soprano 2018
The Trypanosoma cruzi RNA-binding protein RBP42 is expressed in the cytoplasm throughout the life cycle of the parasite	Tyler Weisbarth, R.; Das, A.; Castellano, P.; Fisher, M. A.; Wu, H.; Bellofatto, V.	Trypanosoma cruzi, the protozoan parasite that causes Chagas disease in humans, has a complex life cycle that promotes survival in disparate environments. In each environment, the parasite must fine-tune its metabolic pathways to divide and multiply. In the absence of recognizable transcriptional gene regulation, it is apparent that protein levels are determined by post-transcriptional mechanisms…	2018	Apr	Parasitology Research	117	4	1095-1104	29473141	https://dx.doi.org/10.1007/s00436-018-5787-9	TylerWeisbarth 2018
Trypanosoma cruzi reservoir-triatomine vector co-occurrence networks reveal meta-community effects by synanthropic mammals on geographic dispersal	Ibarra-Cerdena, C. N.; Valiente-Banuet, L.; Sanchez-Cordero, V.; Stephens, C. R.; Ramsey, J. M.	Contemporary patterns of land use and global climate change are modifying regional pools of parasite host species. The impact of host community changes on human disease risk, however, is difficult to assess due to a lack of information about zoonotic parasite host assemblages. We have used a recently developed method to infer parasite-host interactions for Chagas Disease (CD) from vector-host co-…	2017		PeerJ	2017 (4) (no pagination)	3152		615266895	http://dx.doi.org/10.7717/peerj.3152	Ibarra-Cerdena 2017
Trypanosoma cruzi Reactivation in the Brain	Gomez, C. A.; Banaei, N.		2018	2010-05-01	New England Journal of Medicine	378	19	1824	29742366	https://dx.doi.org/10.1056/NEJMicm1703763	Gomez 2018
Trypanosoma cruzi Produces the Specialized Proresolving Mediators Resolvin D1, Resolvin D5, and Resolvin E2	Colas, R. A.; Ashton, A. W.; Mukherjee, S.; Dalli, J.; Akide-Ndunge, O. B.; Huang, H.; Desruisseaux, M. S.; Guan, F.; Jelicks, L. A.; Matos Dos Santos, F.; Nagajyothi, J.; Zingman, M. A.; Reyes, J.; Weiss, L. M.; Serhan, C. N.; Tanowitz, H. B.	Trypanosoma cruzi is a protozoan parasite that causes Chagas disease (CD). CD is a persistent, lifelong infection affecting many organs, most notably the heart, where it may result in acute myocarditis and chronic cardiomyopathy. The pathological features include myocardial inflammation and fibrosis. In the Brazil strain-infected CD-1 mouse, which recapitulates many of the features of human infec…	2018	4	Infection & Immunity	86	4	4	29358332	https://dx.doi.org/10.1128/IAI.00688-17	Colas 2018
Trypanosoma cruzi phosphomannomutase and guanosine diphosphate-mannose pyrophosphorylase ligandability assessment	Zmuda, F.; Shepherd, S. M.; Ferguson, M. A. J.; Gray, D. W.; Torrie, L. S.; De Rycker, M.	Chagas' disease, which is caused by the Trypanosoma cruzi parasite, has become a global health problem that is currently treated with poorly tolerated drugs that require prolonged dosing. Therefore, there is a clinical need for new therapeutic agents that can mitigate these issues. The phosphomannomutase (PMM) and guanosine diphosphate-mannose pyrophosphorylase (GDP-MP) enzymes form part of the d…	2019	2012-08-01	Antimicrobial Agents & Chemotherapy	12		12	31405854	https://dx.doi.org/10.1128/AAC.01082-19	Zmuda 2019
Trypanosoma cruzi Neurotrophic Factor Facilitates Cardiac Repair in a Mouse Model of Chronic Chagas Disease	Ledoux, T.; Aridgides, D.; Salvador, R.; Ngwenyama, N.; Panagiotidou, S.; Alcaide, P.; Blanton, R. M.; Perrin, M. A.	Most patients acutely infected with Trypanosoma cruzi undergo short-term structural and functional cardiac alterations that heal without sequelae. By contrast, in patients whose disease progresses to chronic infection, irreversible degenerative chronic Chagas cardiomyopathy (CCC) may develop. To account for the contrast between cardiac regeneration in high-parasitism acute infection and progressi…	2019	Jan	Journal of Pharmacology & Experimental Therapeutics	368	1	2020-11-01	30348750	https://dx.doi.org/10.1124/jpet.118.251900	Ledoux 2019
Trypanosoma cruzi infection, discrete typing units and feeding sources among Psammolestes arthuri (Reduviidae: Triatominae) collected in eastern Colombia	Velasquez-Ortiz, N.; Hernandez, C.; Herrera, G.; Cruz-Saavedra, L.; Higuera, A.; Arias-Giraldo, L. M.; Urbano, P.; Cuervo, A.; Teheran, A.; Ramirez, J. D.	BACKGROUND: Chagas disease (CD) is caused by the protozoan parasite Trypanosoma cruzi, and is transmitted by hematophagous insects of the family Reduviidae. Psammolestes arthuri is a sylvatic triatomine distributed in Colombia and Venezuela which feeds on birds and there are a few studies that have reported Ps. arthuri naturally infected with T. cruzi. In Colombia, Ps. arthuri has been found in d…	2019	2008-04-01		12	1	157	30961657	https://dx.doi.org/10.1186/s13071-019-3422-y	Velasquez-Ortiz 2019
Trypanosoma cruzi infection of human induced pluripotent stem cell-derived cardiomyocytes: an in vitro model for drug screening for Chagas disease	da Silva Lara, L.; Andrade-Lima, L.; Magalhaes Calvet, C.; Borsoi, J.; Lopes Alberto Duque, T.; Henriques-Pons, A.; Souza Pereira, M. C.; Veiga Pereira, L.	Chagas disease, caused by Trypanosoma cruzi, is an important global public health problem which, despite partial efficacy of benznidazole (Bz) in acute phase, urgently needs an effective treatment. Cardiotoxicity is a major safety concern for conduction of more accurate preclinical drug screening platforms. Human induced pluripotent stem cells derived cardiomyocytes (hiPSC-CM) are a reliable mode…	2018	May	Microbes and Infection	20	5	312-316	2000850414	http://dx.doi.org/10.1016/j.micinf.2018.03.002	daSilvaLara 2018
Trypanosoma cruzi Infection Induces Pannexin-1 Channel Opening in Cardiac Myocytes	Barria, I.; Guiza, J.; Cifuentes, F.; Zamorano, P.; Saez, J. C.; Gonzalez, J.; Vega, J. L.	Trypanosoma cruzi, the etiological agent of Chagas diseases, invades the cardiac tissue causing acute myocarditis and heart electrical disturbances. In T. cruzi invasion, the parasite induces [Ca<sup>2+</sup>]<sub>i</sub> transients in the host cells, an essential phenomenon for invasion. To date, knowledge on the mechanism that elicits transients of [Ca<sup>2+</sup>]<sub>i</sub> during the infec…	2018	1	American Journal of Tropical Medicine & Hygiene	98	1	105-112	29141748	https://dx.doi.org/10.4269/ajtmh.17-0293	Barria 2018
Trypanosoma cruzi Infection Induces Cellular Stress Response and Senescence-Like Phenotype in Murine Fibroblasts	Guimaraes-Pinto, K.; Nascimento, D. O.; Correa-Ferreira, A.; Morrot, A.; Freire-de-Lima, C. G.; Lopes, M. F.; DosReis, G. A.; Filardy, A. A.	Trypanosoma cruzi infects and replicates within a wide variety of immune and non-immune cells. Here, we investigated early cellular responses induced in NIH-3T3 fibroblasts upon infection with trypomastigote forms of T. cruzi. We show that fibroblasts were susceptible to T. cruzi infection and started to release trypomastigotes to the culture medium after 4 days of infection. Also, we found that …	2018		Frontiers in Immunology	9		1569	30038622	https://dx.doi.org/10.3389/fimmu.2018.01569	Guimaraes-Pinto 2018
Trypanosoma cruzi infection in a zoo-housed red panda in Kansas	Huckins, G. L.; Eshar, D.; Schwartz, D.; Morton, M.; Herrin, B. H.; Cerezo, A.; Yabsley, M. J.; Schneider, S. M.	A 9-y-old, zoo-housed, male red panda (Ailurus fulgens) became progressively lethargic and inappetent over a 1-wk period. Physical examination was unremarkable. A complete blood count showed mild normocytic, normochromic, non-regenerative anemia with the presence of trypomastigote organisms, consistent with a Trypanosoma sp. The organism was confirmed later as Trypanosoma cruzi lineage TcI via PC…	2019	2025-07-01	Journal of Veterinary Diagnostic Investigation			1040638719865920	31342874	https://dx.doi.org/10.1177/1040638719865926	Huckins 2019
Trypanosoma cruzi infection at the maternal-fetal interface: Implications of parasite load in the congenital transmission and challenges in the diagnosis of infected newborns	Bustos, P. L.; Milduberger, N.; Volta, B. J.; Perrone, A. E.; Laucella, S. A.; Bua, J.	Trypanosoma cruzi is the protozoan unicellular parasite that causes Chagas disease. It can be transmitted from infected mothers to their babies via the connatal route, thus being able to perpetuate even in the absence of Triatomine insect vectors. Chagas disease was originally endemic in Central and South America, but migration of infected women of childbearing age has spread the T. cruzi congeni…	2019		Frontiers in Microbiology	10 (JUN) (no pagination)	1250		628500884	http://dx.doi.org/10.3389/fmicb.2019.01250	Bustos 2019
Tailoring microstructural, drug release properties, and antichagasic efficacy of biocompatible oil-in-water benznidazol-loaded nanoemulsions	Streck, L.; Sarmento, V. H. V.; de Menezes, Rprpb; Fernandes-Pedrosa, M. F.; Martins, A. M. C.; da Silva-Junior, A. A.	This study explored the transition of lamellar-type liquid crystal (LLC) to biocompatible oil-in-water nanoemulsions able to modify benznidazole (BNZ) release and target the drug to cells infected with the T. cruzi parasite. Three cosolvents (2methylpyrrolidone [NMP], polyethylene glycol [POL], and propylene glycol [PRO] were tested to induce the transition of anisotropic LLC systems to isotropic…	2019	1930-01-01	International Journal of Pharmaceutics	555		36-48	30448310	https://dx.doi.org/10.1016/j.ijpharm.2018.11.041	Streck 2019
T. Cruzi infection interferes with thymic regulatory T Cell homeostasis	GonzÃ¡lez, F. B.; Calmon-Hamaty, F.; Seara Cordeiro, S. N.; FernÃ¡ndez Bussy, R.; Spinelli, S. V.; DÂ’Attilio, L.; Bottasso, O.; avino, W.; Cotta-de-Almeida, V.; Villar, S. R.; PÃ©rez, A. R.		2017	2017/04	Rev. med. Rosario	83	1,pt.1	47-47			GonzÃ¡lez 2017
T cells responding to Trypanosoma cruzi detected by membrane TNF-alpha and CD154 in chagasic patients	Ripoll, J. G.; Giraldo, N. A.; Bolanos, N. I.; Roa, N.; Rosas, F.; Cuellar, A.; Puerta, C. J.; Gonzalez, J. M.	INTRODUCTION: Chagas disease is a parasitic infection whose pathogenesis is related to parasite persistence and a dysfunctional cellular immune response. Variability in cytokine secretion among chronic Trypanosoma cruzi-infected patients might preclude the identification of the pool of antigen specific T cells. The goal of this study was to determine the fraction of T cells responding to T. cruzi…	2018	3	Immunity, inflammation and disease	6	1	47-57	28967229	https://dx.doi.org/10.1002/iid3.197	Ripoll 2018
Systems Biology Reveals Relevant Gaps in Fc-gammaR Expression, Impaired Regulatory Cytokine Microenvironment Interfaced With Anti-Trypanosoma cruzi IgG Reactivity in Cardiac Chagas Disease Patients	Gomes, J. A. S.; de Araujo, F. F.; Vitelli-Avelar, D. M.; Sathler-Avelar, R.; Lage, P. S.; Wendling, A. P. B.; do Vale, Inpc; Dias, J. C. P.; Eloi-Santos, S. M.; Teixeira-Carvalho, A.; Martins-Filho, O. A.	The systems biology approach has become an innovative tool when it comes to shedding light on the complex immune response underlying the development/maintenance of distinct clinical forms of Chagas disease. The goal of this study was to describe an integrative overview of Fc-gammaR expression, cytokine microenvironment and anti-Trypanosoma cruzi IgG interface in indeterminate-(IND) and cardiac-(C…	2018		Frontiers in Microbiology	9		1608	30105007	https://dx.doi.org/10.3389/fmicb.2018.01608	Gomes 2018
A systematic review of the Trypanosoma cruzi genetic heterogeneity, host immune response and genetic factors as plausible drivers of chronic chagasic cardiomyopathy	Jimenez, P.; Jaimes, J.; Poveda, C.; Ramirez, J. D.	Chagas disease is a complex tropical pathology caused by the kinetoplastid Trypanosoma cruzi. This parasite displays massive genetic diversity and has been classified by international consensus in at least six Discrete Typing Units (DTUs) that are broadly distributed in the American continent. The main clinical manifestation of the disease is the chronic chagasic cardiomyopathy (CCC) that is leth…	2019	2021-03-01	Parasitology	146	3	269-283	624020486	http://dx.doi.org/10.1017/S0031182018001506	Jimenez 2019
Systematic Review of the Epidemiology of Chagas Disease in the Americas: a Call for Standardized Reporting of Chagas Disease Prevalence	Miranda-Schaeubinger, M.; Chakravarti, I.; Freitas Lidani, K. C.; Omidian, Z.; Gilman, R. H.	Purpose of Review: Estimates of Chagas disease (CD) seroprevalence in the Americas vary greatly. We lack an accurate representation of the state of the disease in this region for various reasons including intranational variability in prevalence and a lack of standardized diagnostic approaches. The goal of this review is to generate an estimate of CD burden in the Americas, by performing a systema…	2019		Current Tropical Medicine Reports.				627388784	http://dx.doi.org/10.1007/s40475-019-00177-y	Miranda-Schaeubinger 2019
Systematic review of communication strategies in neglected tropical diseases eradication, elimination and control programs: A call for action	Nieto-Sanchez, C.; Grijalva, M. J.; Grietens, K. P.; Bates, B.	Many NTD interventions call for community engagement, health promotion, or behavior change strategies to enhance coverage and adherence. Although communication theories and practitioners have conceptualized and developed strategies, it is unclear whether NTD interventions use these perspectives. To understand how communication practice is operationalized in NTD interventions, this systematic revi…	2018	October	American Journal of Tropical Medicine and Hygiene	99 (4 Supplement)		33	627539300		Nieto-Sanchez 2018
Systematic neonatal screening for congenital Chagas disease in Northeast Brazil: prevalence of Trypanosoma cruzi infection in the Southern region of Sergipe	Santos, F. R. D.; Euzebio, D. M.; Oliveira, G. G.; Chagas, M. S.; Ferreira, A. R.; Mendonca, L. A.; Correia, D.; Silva, A. M. D.	INTRODUCTION: Chagas disease is caused by the flagellate protozoan Trypanosoma cruzi, being one of the leading causes of morbidity and mortality in the Americas with an estimated six to seven million infected people worldwide. In Brazil, the improvement in vector control and blood donor screening has evidenced the important epidemiological role of congenital transmission of Chagas disease._x000D_…	2018	May-Jun	Rev Soc Bras Med Trop	51	3	310-317	29972561	https://dx.doi.org/10.1590/0037-8682-0024-2018	Santos 2018
Systematic identification of key genes and pathways in clear cell renal cell carcinoma on bioinformatics analysis	Tian, Z. H.; Yuan, C.; Yang, K.; Gao, X. L.	Background: Clear cell renal cell carcinoma (ccRCC) is the most common subtype of adult renal neoplasm and has a poor prognosis owing to a limited understanding of the disease mechanisms. The aim of this study was to explore and identify the key genes and signaling pathways in ccRCC. Method(s): The GSE36895 gene expression profiles were downloaded from the Gene Expression Omnibus database. Differ…	2019	2021-03-01	Ann Transl Med	7 (5) (no pagination)	Y		627033891	http://dx.doi.org/10.21037/atm.2019.01.18	Tian 2019
Synthetic Peptides Derived from Ribosomal Proteins of Leishmania spp. in Mucocutaneous Leishmaniasis: Diagnostic Usefulness	Florez, M. M.; de Oliveira, C. I.; Puerta, C.; Guzman, F.; Ayala, M.; Montoya, G.; Delgado, G.	BACKGROUND: The serological diagnostic methods currently available for mucocutaneous leishmaniasis (MCL) lack specificity when complete parasites are used; however, such specificity increases when protein fractions are used. Ribosomal proteins have been reported to induce antibodies in animal and humans infected with the parasite, making them a worth candidate to assess its diagnosis potential._x…	2017		Protein & Peptide Letters	24	10	982-988	28758598	https://dx.doi.org/10.2174/0929866524666170728143924	Florez 2017
Synthesis, structure-activity relationship and trypanocidal activity of pyrazole-imidazoline and new pyrazole-tetrahydropyrimidine hybrids as promising chemotherapeutic agents for Chagas disease	Monteiro, M. E.; Lechuga, G.; Lara, L. S.; Souto, B. A.; Vigano, M. G.; Bourguignon, S. C.; Calvet, C. M.; Oliveira, F. O. R., Jr.; Alves, C. R.; Souza-Silva, F.; Santos, M. S.; Pereira, M. C. S.	Drug therapy for Chagas disease remains a major challenge as potential candidate drugs have failed clinical trials. Currently available drugs have limited efficacy and induce serious side effects. Thus, the discovery of new drugs is urgently needed in the fight against Chagas' disease. Here, we synthesized and evaluated the biological effect of pyrazole-imidazoline (1a-i) and pyrazole-tetrahydrop…	2019	2010-08-01	European Journal of Medicinal Chemistry	182		111610	31434040	https://dx.doi.org/10.1016/j.ejmech.2019.111610	Monteiro 2019
Synthesis, molecular docking and biological evaluation of novel phthaloyl derivatives of 3-amino-3-aryl propionic acids as inhibitors of Trypanosoma cruzi trans-sialidase	Kashif, M.; Chacon-Vargas, K. F.; Lopez-Cedillo, J. C.; Nogueda-Torres, B.; Paz-Gonzalez, A. D.; Ramirez-Moreno, E.; Agusti, R.; Uhrig, M. L.; Reyes-Arellano, A.; Peralta-Cruz, J.; Ashfaq, M.; Rivera, G.	In the last two decades, trans-sialidase of Trypanosoma cruzi (TcTS) has been an important pharmacological target for developing new anti-Chagas agents. In a continuous effort to discover new potential TcTS inhibitors, 3-amino-3-arylpropionic acid derivatives (series A) and novel phthaloyl derivatives (series B, C and D) were synthesized and molecular docking, TcTS enzyme inhibition and determina…	2018	2005-08-01	European Journal of Medicinal Chemistry	156		252-268	30006170	https://dx.doi.org/10.1016/j.ejmech.2018.07.005	Kashif 2018
Synthesis, biological evaluation and molecular dynamics studies of 1,2,4-triazole clubbed Mannich bases	Patel, V. M.; Patel, N. B.; Chan-Bacab, M. J.; Rivera, G.	The present work highlightsthe synthesis of a newer biologically active Mannich bases contributing 4-((4-fluorobenzylidene)amino)-5-(pyridin-4-yl)-4H-1,2,4-triazole-3-thiol and various heterocyclic amines via N-Mannich reaction by the conventional method as well as microwave heating approach as a part of an environmentally benign synthetic protocol. All the synthesized compounds were characterize…	2018	Oct	Computational Biology & Chemistry	76		264-274	30092449	https://dx.doi.org/10.1016/j.compbiolchem.2018.07.020	Patel 2018
Synthesis and in vitro evaluation of Ca<sup>2+</sup> channel blockers 1,4-dihydropyridines analogues against Trypanosoma cruzi and Leishmania amazonensis: SAR analysis	Pollo, L. A. E.; de Moraes, M. H.; Cisilotto, J.; Creczynski-Pasa, T. B.; Biavatti, M. W.; Steindel, M.; Sandjo, L. P.	Drugs containing the1,4-dihydropyridine (DHP) core have recently attracted attention concerning their antiparasitic effect against various species of Leishmania and Trypanosoma. This approach named drugs repositioning led to interesting results, which have prompted us to prepare 21 DHP's analogues. The 1,4-DHP scaffold was decorated with different function groups at tree points including the nitr…	2017	Dec	Parasitology International	66	6	789-797	28801098	https://dx.doi.org/10.1016/j.parint.2017.08.005	Pollo 2017
A strong case of dyspnea with eosinophilia	Hammer, R.; Sciaudone, M.	LEARNING OBJECTIVE #1: Recognize strongyloidiasis as a cause of nonischemic cardiomyopathy. LEARNING OBJECTIVE #2: Differentiate treatment for uncomplicated cases versus hyperinfection syndrome in the immunocompromised. CASE: A 48 year-old man with no prior history was evaluated for hypertensive urgency of 200/130. The man reported an intermittent non-productive cough of approximately one year's …	2017	April	Journal of General Internal Medicine	32 (2 Supplement 1)		S421	615580832		Hammer 2017
A strategy based on thermal flexibility to design triosephosphate isomerase proteins with increased or decreased kinetic stability	Quezada, A. G.; Cabrera, N.; Pineiro, A.; Diaz-Salazar, A. J.; Diaz-Mazariegos, S.; Romero-Romero, S.; Perez-Montfort, R.; Costas, M.	Kinetic stability of proteins determines their susceptibility to irreversibly unfold in a time-dependent process, and therefore its half-life. A residue displacement analysis of temperature-induced unfolding molecular dynamics simulations was recently employed to define the thermal flexibility of proteins. This property was found to be correlated with the activation energy barrier (E<sub>act</sub…	2018	09 18	Biochemical & Biophysical Research Communications	503	4	3017-3022	30143261	https://dx.doi.org/10.1016/j.bbrc.2018.08.087	Quezada 2018
Strategies to enhance access to diagnosis and treatment for Chagas disease patients in Latin America	Alonso-Padilla, J.; Cortes-Serra, N.; Pinazo, M. J.; Bottazzi, M. E.; Abril, M.; Barreira, F.; Sosa-Estani, S.; Hotez, P. J.; Gascon, J.	Introduction: Chagas disease, caused by infection with the parasite Trypanosoma cruzi, represents a huge public health problem in the Americas, where millions of people are affected. Despite the availability of two drugs against the infection (benznidazole and nifurtimox), multiple factors impede their effective usage: (1) gaps in patient and healthcare provider awareness; (2) lack of access to d…	2019	2021-03-04	Expert Review of Anti-Infective Therapy	17	3	145-157	626399099	http://dx.doi.org/10.1080/14787210.2019.1577731	Alonso-Padilla 2019
Sterol 14alpha-Demethylase Structure-Based Optimization of Drug Candidates for Human Infections with the Protozoan Trypanosomatidae	Friggeri, L.; Hargrove, T. Y.; Rachakonda, G.; Blobaum, A. L.; Fisher, P.; de Oliveira, G. M.; da Silva, C. F.; Soeiro, M. N. C.; Nes, W. D.; Lindsley, C. W.; Villalta, F.; Guengerich, F. P.; Lepesheva, G. I.	Sterol 14alpha-demethylases (CYP51) are cytochrome P450 enzymes essential for sterol biosynthesis in eukaryotes and therapeutic targets for antifungal azoles. Multiple attempts to repurpose antifungals for treatment of human infections with protozoa (Trypanosomatidae) have been undertaken, yet so far none of them have revealed sufficient efficacy. VNI and its derivative VFV are two potent experim…	2018	2013-12-01	Journal of Medicinal Chemistry	61	23	10910-10921	30451500	https://dx.doi.org/10.1021/acs.jmedchem.8b01671	Friggeri 2018
Sterol 14alpha-Demethylase Structure-Based Design of VNI (( R)- N-(1-(2,4-Dichlorophenyl)-2-(1 H-imidazol-1-yl)ethyl)-4-(5-phenyl-1,3,4-oxadiazol-2-yl)benzamide)) Derivatives To Target Fungal Infections: Synthesis, Biological Evaluation, and Crystallographic Analysis	Friggeri, L.; Hargrove, T. Y.; Wawrzak, Z.; Blobaum, A. L.; Rachakonda, G.; Lindsley, C. W.; Villalta, F.; Nes, W. D.; Botta, M.; Guengerich, F. P.; Lepesheva, G. I.	Because of the increase in the number of immunocompromised patients, the incidence of invasive fungal infections is growing, but the treatment efficiency remains unacceptably low. The most potent clinical systemic antifungals (azoles) are the derivatives of two scaffolds: ketoconazole and fluconazole. Being the safest antifungal drugs, they still have shortcomings, mainly because of pharmacokinet…	2018	07 12	Journal of Medicinal Chemistry	61	13	5679-5691	29894182	https://dx.doi.org/10.1021/acs.jmedchem.8b00641	Friggeri 2018
Spontaneous dormancy protects Trypanosoma cruzi during extended drug exposure	Sanchez-Valdez, F. J.; Padilla, A.; Wang, W.; Orr, D.; Tarleton, R. L.	The ability of the Chagas disease agent Trypanosoma cruzi to resist extended in vivo exposure to highly effective trypanocidal compounds prompted us to explore the potential for dormancy and its contribution to failed drug treatments in this infection. We document the development of non-proliferating intracellular amastigotes in vivo and in vitro in the absence of drug treatment. Non-proliferativ…	2018	03 26	eLife	7	3	26	29578409	https://dx.doi.org/10.7554/eLife.34039	Sanchez-Valdez 2018
Spiralyde A, an Antikinetoplastid Dolabellane from the Brown Alga Dictyota spiralis	Chiboub, O.; Sifaoui, I.; Lorenzo-Morales, J.; Abderrabba, M.; Mejri, M.; Fernandez, J. J.; Pinero, J. E.; Diaz-Marrero, A. R.	Bioassay-guided fractionation of the antikinetoplastid extract of the brown alga Dictyota spiralis has led to the isolation of spiralyde A (<b>1</b>), a new dolabellane aldehyde, along with other five known related diterpenes (<b>2</b>-<b>6</b>). Their structures were determined by HRESIMS, 1D and 2D NMR spectroscopy, and comparison with data reported in the literature. The antiparasitic activity…	2019	2025-03-01	Marine Drugs	17	3	25	30934651	https://dx.doi.org/10.3390/md17030192	Chiboub 2019
Spermathecae: Morphofunctional features and correlation with fat bodies and trachea in six species of vectors of Chagas disease	Damieli Nascimento, J.; Caneguim, B. H.; de Paula, M. C.; Rimoldi Ribeiro, A.; Sasso-Cerri, E.; da Rosa, J. A.	Since spermatheca is able to transport spermatozoa and maintain a specific microenvironment for the storage of viable sperm cells for long periods of time, specific morphofunctional features must be involved in this capacity, and an efficient nutritional and oxygen supply must be required. In this study, we investigated the histological features of spermathecae and fat bodies in six species of th…	2019	Sep	Acta Tropica	197		105032	31112712	https://dx.doi.org/10.1016/j.actatropica.2019.05.023	DamieliNascimento 2019
Spectrum of illness in migrants to Canada: Sentinel surveillance through CanTravNet	Boggild, A. K.; Geduld, J.; Libman, M.; Yansouni, C. P.; McCarthy, A. E.; Hajek, J.; Ghesquiere, W.; Mirzanejad, Y.; Vincelette, J.; Kuhn, S.; Plourde, P. J.; Chakrabarti, S.; Greenaway, C.; Hamer, D. H.; Kain, K. C.	Background: Due to ongoing political instability and conflict in many parts of the world, migrants are increasingly seeking asylum and refuge in Canada. Method(s): We examined demographic and travel correlates of illnesses among migrants to Canada to establish a detailed epidemiologic framework of this population for Canadian practitioners. Data on ill-returned Canadian travellers presenting to a…	2019		Journal of Travel Medicine	26 (2) (no pagination)	Y		627101085	http://dx.doi.org/10.1093/jtm/tay117	Boggild 2019
Specific activation of CD4<sup>-</sup>CD8<sup>-</sup> double-negative T cells by Trypanosoma cruzi-derived glycolipids induces a proinflammatory profile associated with cardiomyopathy in Chagas patients	Passos, L. S. A.; Magalhaes, L. M. D.; Soares, R. P.; Marques, A. F.; Nunes, M. D. C. P.; Gollob, K. J.; Dutra, W. O.	Cardiomyopathy is the most severe outcome of Chagas disease, causing more than 12 000 deaths/year. Immune cells participate in cardiomyopathy development either by direct tissue destruction, or by driving inflammation. We have shown that CD4<sup>-</sup>CD8<sup>-</sup> [double-negative (DN)] T cells are major sources of inflammatory and anti-inflammatory cytokines, associated with the cardiac (CAR…	2017	October	Clinical and Experimental Immunology	190	1	122-132	617145109	http://dx.doi.org/10.1111/cei.12992	Passos 2017
Study to evaluate the efficacy and safety of treatment of Cutaneous Leishmaniasis with Meglumine Antimonate applied directly to the lesion or Intramuscularly / Intravenously in several states of Brazil	RBR-6mk5n4; Instituto Nacional de Infectologia Evandro Chagas -Fiocruz - Rio de Janeiro, R. J. Brazil; Instituto Nacional de Infectologia Evandro Chagas -Fiocruz - Rio de Janeiro, R. J. Brazil No False	Inclusion criteria: Inclusion criteria Patients who are able to sign the informed consent and willing to participate in the study as subjects attending the follow-up visits as foreseen by the study schedule; Patients who present up to a maximum of three lesions with or without ulceration; Patients with confirmed parasitic infection by Leishmania by scraping or imprint or histopathological examina…	2018								RBR-6mk5n4 2018
Studies of 4-arylthiazolylhydrazones derived from 1-indanones as Trypanosoma cruzi squalene epoxidase inhibitors by molecular simulations	Noguera, G. J.; Fabian, L. E.; Lombardo, E.; Finkielsztein, L. M.	Chagas disease or American trypanosomiasis is a parasitic disease caused by the protozoan Trypanosoma cruzi. Its squalene epoxidase (SE) is a target for drug design and development because it is a key enzyme in the biosynthetic pathway of ergosterol, which is essential for the life cycle of the parasite. Previously, we reported that some 4-arylthiazolylhydrazones derived from 1-indanones (TZHs) a…	2018	11 14	Organic & Biomolecular Chemistry	16	44	8525-8536	30357228	https://dx.doi.org/10.1039/c8ob02310g	Noguera 2018
Structure-Based Virtual Screening and In Vitro Evaluation of New Trypanosoma cruzi Cruzain Inhibitors	Herrera-Mayorga, V.; Lara-Ramirez, E. E.; Chacon-Vargas, K. F.; Aguirre-Alvarado, C.; Rodriguez-Paez, L.; Alcantara-Farfan, V.; Cordero-Martinez, J.; Nogueda-Torres, B.; Reyes-Espinosa, F.; Bocanegra-Garcia, V.; Rivera, G.	Chagas disease (CD), or American trypanosomiasis, causes more than 10,000 deaths per year in the Americas. Current medical therapy for CD has low efficacy in the chronic phase of the disease and serious adverse effects; therefore, it is necessary to search for new pharmacological treatments. In this work, the ZINC<sup>15</sup> database was filtered using the N-acylhydrazone moiety and a subsequen…	2019	2009-04-01	International Journal of Molecular Sciences	20	7	9	30970549	https://dx.doi.org/10.3390/ijms20071742	Herrera-Mayorga 2019
Structure-activity relationship study of antitrypanosomal chalcone derivatives using multivariate analysis	Gomes, K. S.; da Costa-Silva, T. A.; Oliveira, I. H.; Aguilar, A. M.; Oliveira-Silva, D.; Uemi, M.; Silva, W. A.; Melo, L. R.; Andrade, C. K. Z.; Tempone, A. G.; Baldim, J. L.; Lago, J. H. G.	Chagas disease represents one of several neglected diseases with a reduced number of chemotherapeutical drugs including the highly toxic compounds benznidazole and nifurtimox. In this sense, natural products represent an import scaffold for the discovery of new biologically active compounds, in which chalcones are promising representatives due to their antitrypanosomal potential. In this work, a …	2019	2015-06-01	Bioorganic & Medicinal Chemistry Letters	29	12	1459-1462	31000155	https://dx.doi.org/10.1016/j.bmcl.2019.04.020	Gomes 2019
Structure and function of L-threonine-3-dehydrogenase from the parasitic protozoan Trypanosoma brucei revealed by X-ray crystallography and geometric simulations	Adjogatse, E.; Erskine, P.; Wells, S. A.; Kelly, J. M.; Wilden, J. D.; Chan, A. W. E.; Selwood, D.; Coker, A.; Wood, S.; Cooper, J. B.	Two of the world's most neglected tropical diseases, human African trypanosomiasis (HAT) and Chagas disease, are caused by protozoan parasites of the genus Trypanosoma. These organisms possess specialized metabolic pathways, frequently distinct from those in humans, which have potential to be exploited as novel drug targets. This study elucidates the structure and function of L-threonine-3-dehydr…	2018	2021-09-01	Acta crystallographica	Section D, Structural biology. Part 9. 74		861-876	624846068	http://dx.doi.org/10.1107/S2059798318009208	Adjogatse 2018
Structural study of the trypanosoma cruzi TCADK1 protein	Rivera, L.; Gomez Barroso, J. A.; Aguilar, C. F.	The flagellated protozoan parasite Trypanosoma cruzi is the etiological agent of Chagas' disease which constitutes a serious health problem in the Americas. This parasite presents a complex life cycle which involves major morphological and gene expression modifications as they encounter different environments. Due to the extremely variable nutrient availability conditions, they need a coordinated…	2018		Biocell	3)		51	621859299		Rivera 2018
Structural studies of Old Yellow Enzyme of Leishmania braziliensis in solution	Veloso-Silva, L. L. W.; Dores-Silva, P. R.; Bertolino-Reis, D. E.; Moreno-Oliveira, L. F.; Libardi, S. H.; Borges, J. C.	First described in yeast in 1932 by Christian & Warburg, the Old Yellow Enzyme (OYE) (EC 1.6.99.1) has aroused the interest of the scientific community regarding its high ability to catalyze stereoselective reactions of alpha/beta-unsaturated carbonyl compounds with important industrial applications. In addition, the OYE family of proteins has been found in different organisms, such as plants, ba…	2019	Jan	Archives of Biochemistry & Biophysics	661		87-96	30447208	https://dx.doi.org/10.1016/j.abb.2018.11.009	Veloso-Silva 2019
Serological survey of Leptospira interrogans, Toxoplasma gondii and Trypanosoma cruzi in free roaming domestic dogs and cats from a marginated rural area of Yucatan Mexico	Ortega-Pacheco, A.; Guzman-Marin, E.; Acosta-Viana, K. Y.; Vado-Solis, I.; Jimenez-Delgadillo, B.; Cardenas-Marrufo, M.; Perez-Osorio, C.; Puerto-Solis, M.; Jimenez-Coello, M.	To evaluate the serological status for Trypanosoma cruzi, Toxoplasma gondii and Leptospira interrogans antibodies in free roaming dogs and cats from a marginated rural community in Yucatan Mexico, 100 households were visited and animals sampled. From the 106 samples, 93 were from dogs and 13 were from cats. Frequency of positive results for T. gondii, T. cruzi and Leptospira spp was 97.8%, 9.7% a…	2017	Feb	Veterinary Medicine & Science	3	1	40-47	29067208	https://dx.doi.org/10.1002/vms3.55	Ortega-Pacheco 2017
Serological evidence of trypanosoma cruzi infection among blood donors in Maricopa County, Arizona, 2007-2016	Beatty, N.; Levy, C.	In the United States (US) the voluntary testing of blood donors for antibodies to Trypanosoma cruzi was initiated in January 2007. Since April 2010 the US Food and Drug Administration has approved several tests to allow blood, tissue, and organ donors to be screened for serological evidence of T. cruzi infection. Since 2007 Maricopa County Department of Public Health (MCDPH) in Phoenix, Arizona, …	2017	November	American Journal of Tropical Medicine and Hygiene	97 (5 Supplement 1)		571	620731817		Beatty 2017
Serological and molecular inquiry of Chagas disease in an Afro-descendant settlement in Mato Grosso do Sul State, Brazil	Martins, M. F. D. S.; Pereira, M. B.; Ferreira, J. J. G.; Franca, A. O.; Cominetti, M. C.; Ferreira, E. C.; Dorval, M. E. M. C.; Rossi, C. L.; Mazon, S. B.; de Almeida, E. A.; Costa, S. C. B.; Marcon, G. E. B.	Furnas do Dionisio is a Brazilian Afro-descendant settlement in the city of Jaraguari, 21.4 miles from Campo Grande, Mato Grosso do Sul, Brazil. Approximately 96 families live in this quilombola (Maroon) settlement, also known in Brazil as a remnant community of descendants of African slaves. Recent studies found 20% of households were infested by triatomines, 18% of insects captured in the commu…	2018		PLoS One	13	1	e0189448	620426118	http://dx.doi.org/10.1371/journal.pone.0189448	Martins 2018
Selective Antiprotozoal Activity of Nitric Oxide-releasing Chitosan Nanoparticles Against Trypanosoma cruzi: Toxicity and Mechanisms of Action	Contreras Lancheros, C. A.; Pelegrino, M. T.; Kian, D.; Tavares, E. R.; Hiraiwa, P. M.; Goldenberg, S.; Nakamura, C. V.; Yamauchi, L. M.; Pinge-Filho, P.; Seabra, A. B.; Yamada-Ogatta, S. F.	BACKGROUND: Chagas' disease, caused by Trypanosoma cruzi, was described for the first time over a hundred years ago. Nonetheless, clinically available drugs still lack effective and selective properties. Nitric oxide (NO) produced by activated macrophages controls the progression of disease by killing the parasite._x000D_METHODS AND RESULTS: Here, chitosan nanoparticles (CS NPs) were synthesized …	2018		Current Pharmaceutical Design	24	7	830-839	29424305	https://dx.doi.org/10.2174/1381612824666180209105625	ContrerasLancheros 2018
Searching susceptibility to hepatitis A among men who have sex with men in Rio de Janeiro	RBR-7djt4p; Instituto Nacional de Infectologia Evandro Chagas - FundaÃ§Ã£o Oswaldo Cruz - Rio de Janeiro, R. J. Brazil; Instituto Nacional de Infectologia Evandro Chagas - FundaÃ§Ã£o Oswaldo Cruz - Rio de Janeiro, R. J. Brazil Yes False	Inclusion criteria: Men aged 18 to 35 years old male at birth who report having had sexual relations with people of the same biological sex in the last six months and live in Rio de Janeiro metropolitan area._x000D_Exclusion criteria: Subjects who have received at least one shot of hepatitis A vaccine at some point in their life. Subjects who live with any autoimmune disease. Any other condition …	2018								RBR-7djt4p 2018
Second-Best Is Better Than Nothing: Cockroaches as a Viable Food Source for the Kissing Bug Triatoma recurva (Hemiptera: Reduviidae)	Schmidt, J. O.; Dorn, P. L.; Klotz, S. A.	Kissing bugs in the genus Triatoma are obligate blood feeders that feed mainly on vertebrate blood and have lost the predatory lifestyle found in other reduviid bugs. They occasionally also feed on the hemolymph of arthropods, especially during the first and second instar stages. The largest kissing bug species in the United States, Triatoma recurva (Stal) (Hemiptera: Reduviidae), is poorly known…	2019	2021-04-16	Journal of medical entomology	56	3	651-655	627452501	http://dx.doi.org/10.1093/jme/tjy233	Schmidt 2019
Segundo Simposio SDC Proyecto PR-CHAGAS	Mendoza, Oscar	Para la Sociedad de CirugÃ­a de BogotÃ¡, Hospital de San JosÃ©, es un honor haber contado con la presencia del doctor Josep Brugada en el marco del Segundo Simposio SDC, muerte sÃºbita cardiovascular, del proyecto PR-Chagas, financiado por Colciencias y organizado en conjunto con docentes de la FundaciÃ³n Universitaria de Ciencias de la Salud. La enfermedad de Chagas es una de las enfermedades tr…	2018	2018/00	Repert. med. cir	27	2	71-72			Mendoza 2018
Selective testing of at-risk blood donors for trypanosoma cruzi and plasmodium SPP. In Italy	Foglieni, B.; Raffaele, L.; Berzuini, A.; Spreafico, M.; Guarnori, I.; Oggioni, M.; Campisi, D.; Rossini, S.; Prati, D.	Background: Population migrations and overseas travels for tourism or work to regions at risk for tropical diseases are increasing, and represents potential transfusion- transmitted infections in non-endemic disease countries. The Plasmodium spp. and the protozoans Trypanosoma cruzi, the causative organisms of malaria and Chagas Disease (CD), are becoming a major focus in the blood transfusion co…	2017	June	Vox Sanguinis	112 (Supplement 1)		184	616916978	http://dx.doi.org/10.1111/vox.12530	Foglieni 2017
Series of Alkynyl-Substituted Thienopyrimidines as Inhibitors of Protozoan Parasite Proliferation	Woodring, J. L.; Behera, R.; Sharma, A.; Wiedeman, J.; Patel, G.; Singh, B.; Guyett, P.; Amata, E.; Erath, J.; Roncal, N.; Penn, E.; Leed, S. E.; Rodriguez, A.; Sciotti, R. J.; Mensa-Wilmot, K.; Pollastri, M. P.	Discovery of new chemotherapeutic lead agents can be accelerated by optimizing chemotypes proven to be effective in other diseases to act against parasites. One such medicinal chemistry campaign has focused on optimizing the anilinoquinazoline drug lapatinib (1) and the alkynyl thieno[3,2-d]pyrimidine hit GW837016X (NEU-391, 3) into leads for antitrypanosome drugs. We now report the structure-act…	2018	2021-10-11	ACS Medicinal Chemistry Letters	9	10	996-1001	623927774	http://dx.doi.org/10.1021/acsmedchemlett.8b00245	Woodring 2018
Sylvatic host associations of Triatominae and implications for Chagas disease reservoirs: a review and new host records based on archival specimens	Georgieva, A. Y.; Gordon, E. R. L.; Weirauch, C.	BACKGROUND: The 152 extant species of kissing bug include important vectors of the debilitating, chronic, and often fatal Chagas disease, which affects several million people mainly in Central and South America. An understanding of the natural hosts of this speciose group of blood-feeding insects has and will continue to aid ongoing efforts to impede the spread of Chagas disease. However, informa…	2017		PeerJ	5		e3826	28948106	https://dx.doi.org/10.7717/peerj.3826	Georgieva 2017
Swat Team	Price, S.	How is Texas coping with the deadly diseases that come from bugs?	2018	2001-06-01	Texas medicine	114	6	20-25	31009541		Price 2018
Suspected changes in isotopic study of myocardial perfusion in patients with Chagas disease and normal epicardial coronary arteries	Marin-Oyaga, V.; Franco-Reyes, C.; Buitrago-Gomez, A.; Gutierrez-Villamil, C.	Chagas disease is a parasitic entity caused by Tripanosoma cruzi with a high prevalence in America, mostly in Latin America. Its indeterminate phase lasts between 10 and 30 years. Within this period patients do not show symptoms and can migrate to anywhere in the world. The most relevant consequence is chagasic cardiomyopathy with different manifestations. Many times the initial sign of this card…	2017	September - October	Revista Colombiana de Cardiologia	24	5	512.e1-512.e5	614007193	http://dx.doi.org/10.1016/j.rccar.2016.11.003	Marin-Oyaga 2017
Survivorship of wild caught Mepraia spinolai nymphs: The effect of seasonality and Trypanosoma cruzi infection after feeding and fasting in the laboratory	Cabe, A. M.; Yanez, F.; Pinto, R.; Lopez, A.; Ortiz, S.; Martin, C. M.; Botto-Mahan, C.; Solari, A.	Chagas disease is caused by Trypanosoma cruzi. Vector survival is an important variable affecting vectorial capacity to determine parasite transmission risk. The aims of this study are to evaluate vector survival under fasting/starvation conditions of wild-caught Mepraia spinolai after feeding and fasting, the pathogenicity of T. cruzi infection, the parasite burden and seasonal variation in para…	2019	Jul	Infection, Genetics & Evolution	71		197-204	30953715	https://dx.doi.org/10.1016/j.meegid.2019.04.002	Cabe 2019
Survival of trypanosoma cruzi in human blood components	Tonnetti, L.; Thorp, A.; Stramer, S. L.	Background/Case Studies: Trypanosoma cruzi, the agent of Chagas disease, is associated with 8 to 10 million infections worldwide, mostly in Latin America. Despite the extensive immigration from endemic areas, only 5 cases of transfusion-transmission (TT) T. cruzi have been reported in the US, before blood donor screening was implemented in 2007. Contributing factors to the low number of TT cases …	2017	September	Transfusion	57 (Supplement 3)		61A	618448408	http://dx.doi.org/10.1111/trf.14286	Tonnetti 2017
Survey of Pediatric Infectious Diseases Society Members About Congenital Chagas Disease	Edwards, M. S.; Abanyie, F. A.; Montgomery, S. P.	Participants in a survey about congenital Chagas disease, distributed electronically to Pediatric Infectious Diseases Society members, perceived having limited knowledge about congenital Trypanosoma cruzi infection. Most rarely or never consider the diagnosis in infants born to parents from Latin America. Improved awareness of congenital Chagas disease and assessment of at-risk infants is needed.	2018	Jan	Pediatric Infectious Disease Journal	37	1	e24-e27	28777208	https://dx.doi.org/10.1097/INF.0000000000001733	Edwards 2018
Survey of Children and Adolescents In Relation to Mother In Chagas-Mazza Disease In An Endemic Area	Albarez, R. E.	Introduction: Acute Chagas-Mazza disease and Connatal Chagas in newborns is curable with medical treatment. In children and adolescents the tests are negative with medical treatment, this is more effective when performed at an earlier age.The most common route of transmission is vector, the congenital route is around 5%. Objective(s): Obtain the National Law in Argentina of compulsory performance…	2018	December	Global Heart	13 (4)		407	2001223460	http://dx.doi.org/10.1016/j.gheart.2018.09.114	Albarez 2018
Surveillance of vector-borne pathogens under imperfect detection: lessons from Chagas disease risk (mis)measurement	Minuzzi-Souza, T. T. C.; Nitz, N.; Cuba, C. A. C.; Hagstrom, L.; Hecht, M. M.; Santana, C.; Ribeiro, M.; Vital, T. E.; Santalucia, M.; Knox, M.; Obara, M. T.; Abad-Franch, F.; Gurgel-Goncalves, R.	Vector-borne pathogens threaten human health worldwide. Despite their critical role in disease prevention, routine surveillance systems often rely on low-complexity pathogen detection tests of uncertain accuracy. In Chagas disease surveillance, optical microscopy (OM) is routinely used for detecting Trypanosoma cruzi in its vectors. Here, we use replicate T. cruzi detection data and hierarchical …	2018	2021-01-09	Scientific reports	8	1	151	624200719	http://dx.doi.org/10.1038/s41598-017-18532-2	Minuzzi-Souza 2018
Surveillance of seroepidemiology and morbidity of Chagas disease in the Negro River, Brazilian Amazon	Coura, J. R.; Junqueira, A. C.; Ferreira, J. M. B.	BACKGROUND: Chagas disease in the Brazilian Amazon Region was previously regarded as an enzootic disease of wild animals. More recently, in situations where humans have penetrated the wild ecotope or where triatomines and/or wild animals (marsupials) have invaded human homes resulting in disease transmission, Chagas disease has come to be regarded as an anthropozoonosis. We found that the highest…	2018	2021-01-01	Mem Inst Oswaldo Cruz	113	1	17-23	620493058	http://dx.doi.org/10.1590/0074-02760170169	Coura 2018
Successful Aspects of the Coadministration of Sterol 14alpha-Demethylase Inhibitor VFV and Benznidazole in Experimental Mouse Models of Chagas Disease Caused by the Drug-Resistant Strain of Trypanosoma cruzi	Guedes-da-Silva, F. H.; Batista, Ddgj; Da Silva, C. F.; Pavao, B. P.; Batista, M. M.; Moreira, O. C.; Souza, L. R. Q.; Britto, C.; Rachakonda, G.; Villalta, F.; Lepesheva, G. I.; Soeiro, M. N. C.	Up to now, no vaccines are available for Chagas disease, and the current therapy is largely unsatisfactory. Novel imidazole-based scaffolds of protozoan sterol 14alpha-demethylase (CYP51) inhibitors have demonstrated potent antiparasitic activity with no acute toxicity. Presently our aim was to investigate the effectiveness of the experimental 14alpha-demethylase inhibitor VFV in the mouse models…	2019	2008-03-01	ACS Infectious Diseases	5	3	365-371	30625275	https://dx.doi.org/10.1021/acsinfecdis.8b00253	Guedes-da-Silva 2019
Substrate specificity profiling of M32 metallocarboxypeptidases from Trypanosoma cruzi and Trypanosoma brucei	Frasch, A. P.; Bouvier, L. A.; Oppenheimer, F. M.; Juliano, M. A.; Juliano, L.; Carmona, A. K.; Cazzulo, J. J.; Niemirowicz, G. T.	Metallocarboxypeptidases (MCPs) of the M32 family, while broadly distributed among prokaryotic organisms, have so far been only found in a few eukaryotes including trypanosomatids. Among these organisms are human and animal pathogens of medical relevance such as Trypanosoma brucei and Trypanosoma cruzi, the respective causative agents of sleeping sickness and Chagas disease. The M32 MCP orthologu…	2018	1	Molecular & Biochemical Parasitology	219		2016-10-01	29246805	https://dx.doi.org/10.1016/j.molbiopara.2017.12.001	Frasch 2018
Subcellular localisation of FLAG tagged enzymes of the dynamic protein S-palmitoylation cycle of Trypanosoma cruzi epimastigotes	Batista, C. M.; Saad, F.; Ceccoti, S. P. C.; Eger, I.; Soares, M. J.	Dynamic S-palmitoylation of proteins is the addition of palmitic acid by zDHHC palmitoyl transferases (PATs) and depalmitoylation by palmitoyl protein thioesterases (PPTs). A putative PAT (TcPAT1) has been previously identified in Trypanosoma cruzi, the etiological agent of Chagas disease. Here we analyse other 14 putative TcPATs and 2 PPTs in the parasite genome. T. cruzi cell lines expressing T…	2018		Mem Inst Oswaldo Cruz	113	8	e180086	29846394	https://dx.doi.org/10.1590/0074-02760180086	Batista 2018
Studying effects of different protonation states of His11 and His102 in ribose-5-phosphate isomerase of Trypanosoma cruzi: an example of cooperative behavior	Soares, R. F.; Antunes, D.; Santos, L. H. S.; Rocha, G. V.; Bastos, L. S.; Guimaraes, A. C. R.; Caffarena, E. R.	The Trypanosoma cruzi ribose-5-phosphate isomerase B (TcRpiB) is a crucial piece in the pentose phosphate pathway and thus is a potential drug target for treatment of Chagas' disease. TcRpiB residues, such as Cys69, Asp45, Glu149 and Pro47, have confirmed their roles in substrate recognition, catalytic reaction and binding site conformation. However, the joint performance of His11 and His102, in …	2019	2011-06-01	Journal of Biomolecular Structure & Dynamics			2021-10-01	31184542	https://dx.doi.org/10.1080/07391102.2019.1626769	Soares 2019
Spatio-temporal survey of small mammal-borne Trypanosoma lewisi in Cotonou, Benin, and the potential risk of human infection	Dobigny, G.; Gauthier, P.; Houemenou, G.; Dossou, H. J.; Badou, S.; Etougbetche, J.; Tatard, C.; Truc, P.	Human trypanosomoses are the sleeping sickness in Africa and Chagas disease in Latin America. However, atypical human infections by animal trypanosomes have been described, but poorly investigated. Among them, the supposed rat-specific T. lewisi was shown to be responsible for a few severe cases. In Africa, the scarcity of data and the null awareness about the atypical human trypanosomoses sugges…	2019	2022-07-01	Infection, Genetics & Evolution			103967	31344489	https://dx.doi.org/10.1016/j.meegid.2019.103967	Dobigny 2019
Spatio-temporal characterization of Trypanosoma cruzi infection and discrete typing units infecting hosts and vectors from non-domestic foci of Chile	Ihle-Soto, C.; Costoya, E.; Correa, J. P.; Bacigalupo, A.; Cornejo-Villar, B.; Estadella, V.; Solari, A.; Ortiz, S.; Hernandez, H. J.; Botto-Mahan, C.; Gorla, D. E.; Cattan, P. E.	BACKGROUND: Trypanosoma cruzi is a protozoan parasite that is transmitted by triatomine vectors to mammals. It is classified in six discrete typing units (DTUs). In Chile, domestic vectorial transmission has been interrupted; however, the parasite is maintained in non-domestic foci. The aim of this study was to describe T. cruzi infection and DTU composition in mammals and triatomines from severa…	2019	2		13	2	e0007170	30768613	https://dx.doi.org/10.1371/journal.pntd.0007170	Ihle-Soto 2019
Spatial prediction of risk areas for vector transmission of Trypanosoma cruzi in the State of Parana, southern Brazil	Ferro, E. Silva A. M.; Sobral-Souza, T.; Vancine, M. H.; Muylaert, R. L.; de Abreu, A. P.; Pelloso, S. M.; de Barros Carvalho, M. D.; de Andrade, L.; Ribeiro, M. C.; Toledo, M. J. O.	After obtaining certification of the absence of transmission of the Trypanosoma cruzi by Triatoma infestans in 2006, other native species of protozoan vectors have been found in human dwellings within municipalities of the State of Parana, Southern Brazil. However, the spatial distribution of T. cruzi vectors and how climatic and landscape combined variables explain the distribution are still poo…	2018	10		12	10	e0006907	30365486	https://dx.doi.org/10.1371/journal.pntd.0006907	Ferro 2018
Spatial analyzes of triatomine infestation indices and their association to the actions of a Chagas disease program and environmental variables during a 5-year intervention period	Weinberg, D.; Porcasi, X.; Lanfri, S.; Abril, M.; Scavuzzo, C. M.	Vector control of Chagas disease in the past decades has been mainly based on chemical control. Fundacion Mundo Sano is implementing an Integral Chagas Program in a rural area of the Argentinean Gran Chaco Region since 2002. The objective of this study was to analyze both, temporal and spatial variation of infestation indices and their relation to the actions of the Program and environmental vari…	2018	Dec	Acta Tropica	188		41-49	30142310	https://dx.doi.org/10.1016/j.actatropica.2018.08.025	Weinberg 2018
Spatial analysis of dengue, cysticercosis and Chagas disease mortality in Ecuador, 2011-2016	Nunez-Gonzalez, S.; Gault, C.; Simancas-Racines, D.	Background: Neglected tropical diseases (NTDs) continue to be an important cause of disability and mortality in the poorest tropical and subtropical areas._x000D_Methods: This is an ecological study. We included all death certificates with dengue, cysticercosis and Chagas disease in Ecuador from 2011 to 2016. The spatial autocorrelation was evaluated by GeoDa software through the Global Moran's I…	2019	01 01	Transactions of the Royal Society of Tropical Medicine & Hygiene	113	1	44-47	30295901	https://dx.doi.org/10.1093/trstmh/try106	Nunez-Gonzalez 2019
Some Limitations for Early Diagnosis of Congenital Chagas Infection by PCR	Volta, B. J.; Perrone, A. E.; Rivero, R.; Scollo, K.; Bustos, P. L.; Bua, J.	Trypanosoma cruzi, the causing agent of Chagas disease, can be transmitted to the offspring of infected pregnant women, thus being an epidemiologically important way of parasite transmission in humans. In addition, the migration of infected women from endemic areas to nonendemic countries may export this parasite infection. The diagnosis of congenital Chagas disease relies on the detection of the…	2018	4	Pediatrics	141	Suppl 5	S451-S455	29610170	https://dx.doi.org/10.1542/peds.2016-3719	Volta 2018
Soluble N-ethylmaleimide-sensitive factor attachment protein receptors required during Trypanosoma cruzi parasitophorous vacuole development	Cueto, J. A.; Vanrell, M. C.; Salassa, B. N.; Nola, S.; Galli, T.; Colombo, M. I.; Romano, P. S.	Trypanosoma cruzi, the etiologic agent of Chagas disease, is an obligate intracellular parasite that exploits different host vesicular pathways to invade the target cells. Vesicular and target soluble N-ethylmaleimide-sensitive factor attachment protein receptors (SNAREs) are key proteins of the intracellular membrane fusion machinery. During the early times of T. cruzi infection, several vesicle…	2017	June	Cellular Microbiology	19 (6) (no pagination)	e12713		614114983	http://dx.doi.org/10.1111/cmi.12713	Cueto 2017
Vasoactive intestinal peptide degradation might influence Interleukin-17 expression in cardiac chagasic patients	Pereira, F. B.; Dutra, W. O.; Gollob, K. J.; Reis, E. A.; Oliveira, A. L. G.; Rocha, Modc; Menezes, Cads	The vasoactive intestinal peptide (VIP) expression is lower in cardiac chagasic patients and is related to worse cardiac function. The reduction of VIP in patients with Chagas disease may be a result of its enhanced degradation. To test this hypothesis, the tryptase and chymase expression was evaluated. We also related VIP levels with interleukin-17 (IL-17) expression since VIP may modulate IL-17…	2018	2022-10-01	Rev Inst Med Trop Sao Paulo	60		e57	30365640	https://dx.doi.org/10.1590/S1678-9946201860057	Pereira 2018
Variation in Basal Body Localisation and Targeting of Trypanosome RP2 and FOR20 Proteins	Harmer, J.; Qi, X.; Toniolo, G.; Patel, A.; Shaw, H.; Benson, F. E.; Ginger, M. L.; McKean, P. G.	TOF-LisH-PLL motifs define FOP family proteins; some members are involved in flagellum assembly. The critical role of FOP family protein FOR20 is poorly understood. Here, we report relative localisations of the four FOP family proteins in parasitic Trypanosoma brucei: TbRP2, TbOFD1 and TbFOP/FOP1-like are mature basal body proteins whereas TbFOR20 is present on pro- and mature basal bodies - on t…	2017	Aug	Protist	168	4	452-466	28822909	https://dx.doi.org/10.1016/j.protis.2017.07.002	Harmer 2017
Solid organ transplant and parasitic diseases: A review of the clinical cases in the last two decades	Silvia, F.; Simona, F.; Fabrizio, B.	The aim of this study was to evaluate the occurrence of parasitic infections in solid organ transplant (SOT) recipients. We conducted a systematic review of literature records on posttransplant parasitic infections, published from 1996 to 2016 and available on PubMed database, focusing only on parasitic infections acquired after SOT. The methods and findings of the present review have been presen…	2018	September	Pathogens	7 (3) (no pagination)	65		623827470	http://dx.doi.org/10.3390/pathogens7030065	Silvia 2018
Socioeconomic benefit to individuals of achieving 2020 targets for four neglected tropical diseases controlled/eliminated by innovative and intensified disease management: Human African trypanosomiasis, leprosy, visceral leishmaniasis, Chagas disease	Lenk, E. J.; Redekop, W. K.; Luyendijk, M.; Fitzpatrick, C.; Niessen, L.; Stolk, W. A.; Tediosi, F.; Rijnsburger, A. J.; Bakker, R.; Hontelez, J. A. C.; Richardus, J. H.; Jacobson, J.; Le Rutte, E. A.; de Vlas, S. J.; Severens, J. L.	Background: The control or elimination of neglected tropical diseases (NTDs) has targets defined by the WHO for 2020, reinforced by the 2012 London Declaration. We estimated the economic impact to individuals of meeting these targets for human African trypanosomiasis, leprosy, visceral leishmaniasis and Chagas disease, NTDs controlled or eliminated by innovative and intensified disease management…	2018	2021-03-13	PLoS Negl Trop Dis	12 (3) (no pagination)	e0006250		621575657	http://dx.doi.org/10.1371/journal.pntd.0006250	Lenk 2018
Sociocultural dynamics that influence Chagas disease health care in Colombia	Martinez-Parra, A. G.; Pinilla-Alfonso, M. Y.; Abadia-Barrero, C. E.	Chagas disease (CD) is a Latin America endemic and neglected tropical disease that affects primarily poor people living in rural areas. Its current low profile leads to many diagnostic, treatment, and control challenges. This study aimed to identify and characterize the sociocultural dynamics that influence CD health care in Colombia. Data for our ethnographic study was collected in 2013 and incl…	2018	October	Social Science and Medicine	215		142-150	2001105895	http://dx.doi.org/10.1016/j.socscimed.2018.09.012	Martinez-Parra 2018
Seroprevalencia de la enfermedad de Chagas en Aguarico, provincia de Orellana. Selva amazÃ³nica ecuatoriana 2008- 2015	Quito, Segundo; Herrera, Jorge; Puertas, Soraya; Guerrero, Diego; Medina, BolÃ­var	Objetivo: Determinar la seroprevalencia de la enfermedad de Chagas del cantÃ³n Aguarico, provincia de Orellana. Selva amazÃ³nica ecuatoriana (2008-2015). IntroducciÃ³n: En el cantÃ³n Aguarico los primeros estudios investigativos sobre esta patologÃ­a comprenden desde 1990 con 1.011 examinados y 61 positivos (3,40 %), 2003 con 6.866 examinados y 76 reactivos (2,40%), 2009 con una poblaciÃ³n de 2.0…	2017	2017/06	INSPILIP	1	1	2021-01-01			Quito 2017
Seroprevalencia de infecciÃ³n por Trypanosoma cruzi y factores asociados, en Miraflores, BoyacÃ¡, Colombia	Monroy-DÃ­az, Ãngela; RodrÃ­guez-NiÃ±o, Sonia; SuescÃºn-Carrero, Sandra-Helena; RamÃ­rez-LÃ³pez, Laura	IntroducciÃ³n. La enfermedad de Chagas es causada por el parÃ¡sito Trypanosoma cruzi, se transmite cuando las heces infectadas de vectores triatomineos tienen contacto con el huÃ©sped por medio de una picadura o a travÃ©s de una membrana mucosa; otras vÃ­as de infecciÃ³n incluyen transfusiones, transplantes y transmisiÃ³n congÃ©nita y oral. En Miraflores es una enfermedad de gran endemia que nece…	2018	2018/00	Rev. Investig. Salud. Univ. BoyacÃ¡	5	1	31-47			Monroy-DÃ­az 2018
Seroprevalence of Trypanosoma cruzi infection in the rural population of Sucre State, Venezuela. [Spanish]	Garcia-Jordan, N.; Berrizbeitia, M.; Rodriguez, J.; Concepcion, J. L.; Caceres, A.; Quinones, W.		2017	2021-10-26	Cadernos de saude publica	33	10	e00050216	619795296	http://dx.doi.org/10.1590/0102-311X00050216	Garcia-Jordan 2017
Seroprevalence of Trypanosoma cruzi infection among blood donors in the state of Bahia, Brazil	Miranda, D. L. P.; Ribeiro, G.; Lanza, F. C.; Santos, F. L. N.; Reis, R. B.; Fraga, D. B. M.; Silva, L. K.; Neto, M. M. S.; Santana, I. J.; Dos Reis, M. G.	Introduction: Chagas disease (CD) affects 5.7-7.0 million individuals worldwide, and its prevalence reached 25.1% in the state of Bahia, Brazil. There is an association between the prevalence of CD, the socioeconomic status of the population, and the risk of re-emergence due to non-vectorial transmission, such as blood transfusion. This study determined the seroprevalence of T. cruzi infection am…	2019		Rev Soc Bras Med Trop	52 (no pagination)	e20190146		2002342382	http://dx.doi.org/10.1590/0037-8682-0146-2019	Miranda 2019
Seroprevalence of Trypanosoma cruzi infection among at-risk blood donors in Japan	Sayama, Y.; Furui, Y.; Takakura, A.; Ishinoda, M.; Matsumoto, C.; Taira, R.; Igarashi, S.; Momose, S.; Matsubayashi, K.; Uchida, S.; Hino, S.; Nagai, T.; Satake, M.	BACKGROUND: Chagas disease is caused by Trypanosoma cruzi and is endemic in Latin America. In nonendemic countries, including Japan, Chagas disease is primarily a problem in the context of transfusion transmission. Approximately 250,000 immigrants from Latin America reside in Japan, and many of those individuals serve as active blood donors. This study surveyed the seroprevalence of T. cruzi infe…	2019	1	Transfusion	59	1	287-294	30474861	https://dx.doi.org/10.1111/trf.14999	Sayama 2019
Seroprevalence of transfusion-transmissible infectious diseases at a hemotherapy service located in southwest Bahia, Brazil	Reboucas, Kaaf; Narici, F. M.; Santos Junior, M. N.; Neres, N. S. M.; Oliveira, M. V.; Souza, C. L.	INTRODUCTION: The serological screening of blood donors has been instituted by the Brazilian Ministry of Health and is mandatory in the research on several diseases transmissible through blood transfusion. Blood banks need to establish a screening service capable of reducing associated transfusions risks._x000D_OBJECTIVE: The objective of this study was to establish the prevalence of transfusion-…	2019	2017-06-01	Hematology Transfusion & Cell Therapy	17		17	31412988	https://dx.doi.org/10.1016/j.htct.2019.03.007	Reboucas 2019
Seroprevalence of human Trypanosoma cruzi infection in the North of Estado de Mexico	Gonzalez-Guzman, S.; Pichardo-Avila, S.; Mimbrera-Rodriguez, E.; Crescencio-Trujillo, J. A.; Gasca-Leyva, M. L.; Martinez-Hernandez, F.; Rivas, N.; Alejandre-Aguilar, R.	INTRODUCTION: Chagas disease is a neglected public health problem in Mexico; however, detailed studies to determine the seroprevalence in some states have not been performed._x000D_METHODS: A total 1,504 human serum from thirteen communities in Estado de Mexico, were analyzed with three diagnostics techniques._x000D_RESULTS: The overall seroprevalence was 9.1%, with high prevalence among people a…	2017	Nov-Dec	Rev Soc Bras Med Trop	50	6	839-842	29340464	https://dx.doi.org/10.1590/0037-8682-0512-2016	Gonzalez-Guzman 2017
Seroprevalence of Chikungunya virus in blood donors from Northern and Southeastern Brazil	Slavov, S. N.; Otaguiri, K. K.; Bianquini, M. L.; Bitencourt, H. T. O.; Chagas, M. C. M.; Guerreiro, D. S. D. S.; Figueiredo, L. T. M.; Covas, D. T.; Kashima, S.	Background: Chikungunya virus, an arbovirus that belongs to the Alphavirus genus of the Togaviridae family, causes a febrile illness accompanied by rash and arthralgia. It is estimated that during outbreaks, the prevalence of Chikungunya virus RNA in viremic blood donations varies between 0.4 and 2.1%; therefore, this virus may be transmitted by transfusion. In Brazil, Chikungunya virus has been …	2018	October - December	Hematology, Transfusion and Cell Therapy	40	4	358-362	2000811957	http://dx.doi.org/10.1016/j.htct.2018.04.002	Slavov 2018
[Seroprevalence of Chagas'Disease in older than 14 years old in rural Chaco areas of Santa Fe Province.]	Mendicino, D.; Colussi, C.; Stafuza, M.; Manattini, S.; Montemaggiore, S.; Nepote, M.	Introduction: Chagas'Disease (CD) is endemic en Chaco Region. It is unknown the seroprevalence in population older than 14 years old from rural Chaco areas of Santa Fe Province. This study aimed to determine the seroprevalence of and socio-environmental factors associated with CD in inhabitants >14 years old of rural Chaco areas of Santa Fe, Argentina._x000D_Methods: A cross-sectional study was c…	2019	02 27	Revista de la Facultad de Ciencias Medicas de Cordoba	76	1	47-51	30882341	https://dx.doi.org/10.31053/1853.0605.v76.n1.21946	Mendicino 2019
Seroprevalence of antibodies against the three serotypes of poliovirus and IPV vaccine response in adult solid organ transplant candidates	Brandao, L. G. P.; Santoro-Lopes, G.; Oliveira, S. S.; da Silva, E. E.; do Brasil, Peaa	OBJECTIVES: To assess the prevalence of protective antibody titers to polioviruses in adults candidates for solid organ transplant (SOT), and to assess the immunogenic response to inactivated polio vaccine in this population._x000D_METHODS: The study included SOT candidates referred to Immunization Reference Centre of Evandro Chagas National Institute of Infectious Diseases from March 2013 to Jan…	2018	07 25	Vaccine	36	31	4681-4686	29937244	https://dx.doi.org/10.1016/j.vaccine.2018.06.031	Brandao 2018
Seroprevalence and geographical distribution of sero-positive blood donors to Trypanosoma cruzi at the central blood bank of the National Medical Center "La Raza"	Gonzalez-Guzman, S.; Paredes-Cervantes, V.; Edward, B. T.; Crescencio-Trujillo, J. A.; Guerra-Marquez, A.; Rivas, N.; Alejandre-Aguilar, R.; Bermudez-Torres, E.; Gonzalez-Cano, P.	BACKGROUND: Trypanosoma cruzi is a protozoan parasite that causes Chagas disease endemic to Latin-America. It is estimated that 1.0 to 1.5% of Mexicans are infected with T. cruzi, which constitutes a potential risk of disease transmission via contaminated blood. New cases are being reported worldwide due to the migration of infected people from endemic areas. STUDY DESIGN AND METHODS: Serum sampl…	2019	Februaryy	Transfusion	59	2	639-647	625352497	http://dx.doi.org/10.1111/trf.15074	Gonzalez-Guzman 2019
Robotic serra-dorea operation for recurrent acalasia	Zilberstein, B.; Manesco, T.; Barchi, L.; Souza, W. P.	Achalasia is a condition that affects 01 to 03 individuals in 100,000 and is consequent to denervation of the esophagus, compromising its peristalsis and relaxation of the lower esophageal sphincter (LES). From an etiological point of view in South America, mainly in Brazil, the most common cause is Chagas' disease, with destruction of Meissner and Auerbach plexuses by Trypanosoma cruzi. As compl…	2019	April	Surgical Endoscopy	33 (Supplement 1)		S417	627143113	http://dx.doi.org/10.1007/s00464-019-06707-z	Zilberstein 2019
The RNA-binding protein TcUBP1 up-regulates an RNA regulon for a cell surface-associated Trypanosoma cruzi glycoprotein and promotes parasite infectivity	Sabalette, K. B.; Romaniuk, M. A.; Noe, G.; Cassola, A.; Campo, V. A.; De Gaudenzi, J. G.	The regulation of transcription in trypanosomes is unusual. To modulate protein synthesis during their complex developmental stages, these unicellular microorganisms rely largely on post-transcriptional gene expression pathways. These pathways include a plethora of RNA-binding proteins (RBPs) that modulate all steps of the mRNA life cycle in trypanosomes and help organize transcriptomes into clus…	2019	2028-06-01	Journal of Biological Chemistry	294	26	10349-10364	31113862	https://dx.doi.org/10.1074/jbc.RA118.007123	Sabalette 2019
Risk of esophageal cancer in achalasia cardia: A meta-analysis	Gillies, C. L.; Farrukh, A.; Abrams, K. R.; Mayberry, J. F.	Introduction: The association between cancer of the esophagus and achalasia has long been recognized. However, it has also been recognized that cancers themselves can give rise to achalasia-like syndromes. The risk of developing cancer is also a factor in assessing whether there is a potential role for surveillance in this disease. This paper uses published work to form the basis for a meta-analy…	2019	June	JGH Open	3	3	196-200	626312019	http://dx.doi.org/10.1002/jgh3.12132	Gillies 2019
Risk maps for cities: Incorporating streets into geostatistical models	Rose, E. B.; Lee, K.; Roy, J. A.; Small, D.; Ross, M. E.; Castillo-Neyra, R.; Levy, M. Z.	Vector-borne diseases commonly emerge in urban landscapes, and Gaussian field models can be used to create risk maps of vector presence across a large environment. However, these models do not account for the possibility that streets function as permeable barriers for insect vectors. We describe a methodology to transform spatial point data to incorporate permeable barriers, by distorting the map…	2018	11	Spatial and Spatio-temporal Epidemiology	27		47-59	30409376	https://dx.doi.org/10.1016/j.sste.2018.08.003	Rose 2018
Risk factors and select cardiac characteristics in dogs naturally infected with Trypanosoma cruzi presenting to a teaching hospital in Texas	Meyers, A. C.; Hamer, S. A.; Matthews, D.; Gordon, S. G.; Saunders, A. B.	BACKGROUND: Chagas disease, caused by the protozoan parasite Trypanosoma cruzi, causes sudden death and chronic heart disease with no currently approved treatment._x000D_OBJECTIVE: To report epidemiologic and select cardiac characteristics associated with T. cruzi infection in dogs presenting to a teaching hospital in Texas._x000D_ANIMALS: Three hundred seventy-five client-owned dogs._x000D_METHO…	2019	Jul	Journal of Veterinary Internal Medicine	33	4	1695-1706	31119786	https://dx.doi.org/10.1111/jvim.15516	Meyers 2019
Rhodnius prolixus: Identification of missing components of the IMD immune signaling pathway and functional characterization of its role in eliminating bacteria	Salcedo-Porras, N.; Guarneri, A.; Oliveira, P. L.; Lowenberger, C.	The innate immune system in insects is regulated by specific signalling pathways. Most immune related pathways were identified and characterized in holometabolous insects such as Drosophila melanogaster, and it was assumed they would be highly conserved in all insects. The hemimetabolous insect, Rhodnius prolixus, has served as a model to study basic insect physiology, but also is a major vector …	2019			14	4	e0214794	30943246	https://dx.doi.org/10.1371/journal.pone.0214794	Salcedo-Porras 2019
Revisiting the Trypanosoma cruzi metacyclogenesis: morphological and ultrastructural analyses during cell differentiation	Goncalves, C. S.; Avila, A. R.; de Souza, W.; Motta, M. C. M.; Cavalcanti, D. P.	BACKGROUND: Trypanosoma cruzi uses several strategies to survive in different hosts. A key step in the life-cycle of this parasite is metacyclogenesis, which involves various morphological, biochemical, and genetic changes that induce the differentiation of non-pathogenic epimastigotes into pathogenic metacyclic trypomastigotes. During metacyclogenesis, T. cruzi displays distinct morphologies and…	2018	02 06		11	1	83	29409544	https://dx.doi.org/10.1186/s13071-018-2664-4	Goncalves 2018
Revisiting the Homoploid Hybrid Speciation Process of the Triatoma brasiliensis macromelasoma Galvao, 1956 (Hemiptera, Triatominae) Using Cytogenetic and Molecular Markers	Guerra, A. L.; Borsatto, K. C.; Teixeira, N. P. D.; Madeira, F. F.; de Oliveira, J.; da Rosa, J. A.; Azeredo-Oliveira, M. T. V.; Alevi, K. C. C.	Triatomines are vectors of Trypanosoma cruzi, the etiologic agent of Chagas disease. Although the evolutionary process in triatomine is considered as disruptive, cryptic speciation and homoploid hybridization also are possible modes of speciation. Several analyses suggested Triatoma brasiliensis macromelasoma as a product of hybridization between T. brasiliensis and Triatoma juazeirensis. Thus, w…	2019	Apr	American Journal of Tropical Medicine & Hygiene	100	4	911-913	30793690	https://dx.doi.org/10.4269/ajtmh.17-0813	Guerra 2019
Revisiting blood safety practices given emerging data about Zika Virus	Bloch, E. M.; Ness, P. M.; Tobian, A. A. R.; Sugarman, J.		2018	2021-05-10	New England Journal of Medicine	378	19	1837-1841	622108946	http://dx.doi.org/10.1056/NEJMsb1704752	Bloch 2018
Revising the structural diversity of ribosomal proteins across the three domains of life	Melnikov, S.; Manakongtreecheep, K.; Soll, D.	Ribosomal proteins are indispensable components of a living cell, and yet their structures are remarkably diverse in different species. Here we use manually curated structural alignments to provide a comprehensive catalog of structural variations in homologous ribosomal proteins from bacteria, archaea, eukaryotes, and eukaryotic organelles. By resolving numerous ambiguities and errors of automate…	2018		Molecular Biology and Evolution	35	7	1588-1598	623666766	http://dx.doi.org/10.1093/molbev/msy021	Melnikov 2018
Revisiting an old idea: engineering against vector-borne diseases in the domestic environment	Wilson, A. L.; Davies, M.; Lindsay, S. W.	On 21 April 1983 the Royal Society of Tropical Medicine and Hygiene held a joint meeting with the Institute of Civil Engineers at Manson House on 'Engineering against Insect-borne Diseases in the Domestic Environment'. The summary of a talk by Chris Schofield and Graham White on 'House design and domestic vectors of disease' was published in a special issue of the Transactions of the Royal Societ…	2019	2021-02-01	Transactions of the Royal Society of Tropical Medicine and Hygiene	113	2	53-55	626623288	http://dx.doi.org/10.1093/trstmh/try103	Wilson 2019
The Skiles Mummy: Care of a debilitated hunter-gatherer evidenced by coprolite studies and stable isotopic analysis of hair	Verostick, K. A.; Teixeira-Santos, I.; Bryant, V. M., Jr.; Reinhard, K. J.	The Skiles Mummy (SMM), a naturally mummified adult male from the late archaic period of Lower Pecos Canyonlands of South Texas, represents a unique case of care. SMM is an exceptional mummy within this region due to both the retention of a full head of hair, and having a diagnosed case of megacolon, a complication commonly associated with Chagas disease caused by Trypanosoma cruzi. Stable isotop…	2019	6	International Journal Of Paleopathology	25		82-90	30197207	https://dx.doi.org/10.1016/j.ijpp.2018.08.004	Verostick 2019
Six-minute walk test and incremental shuttle walk test in the evaluation of functional capacity in Chagas heart disease	Costa, H. S.; Lima, M. M. O.; Lage, S. M.; da Costa, F. S. M.; Figueiredo, P. H. S.; da Costa Rocha, M. O.	Chagas heart disease (CHD) leads to a progressive functional impairment. Field tests, as the 6-min walk test (6MWT) and the incremental shuttle walk test (ISWT), may be inexpensive approaches in the evaluation of functional capacity of these patients. The present study was addressed to compare the 6MWT and the ISWT measures, and to determine the accuracy of these tests in the identification of fu…	2018	Oct		14	5	844-850	30443532	https://dx.doi.org/10.12965/jer.1836326.163	Costa 2018
The single mitochondrion of C. Fasciculata is a dynamic network	DiMaio, J. C.; Ruthel, G.; Cannon, J. J.; Malfara, M. F.; Povelones, M. L.	Mitochondria are dynamic organelles, undergoing fission and fusion in order to maintain their shape and function. Kinetoplastid parasites, including the causative agents of Chagas disease, African sleeping sickness and Leishmaniasis, possess unusual mitochondrial characteristics. For instance, each cell contains only one mitochondrion, which typically assumes the shape of a branched network exten…	2017		Molecular Biology of the Cell. Conference	28	26		620042072	http://dx.doi.org/10.1091/mbc.E17-10-0618	DiMaio 2017
Simultaneous pulmonary thromboembolism and superior mesenteric venous thrombosis associated with hyperhomocysteinemia secondary to pernicious anemia-induced vitamin B12 deficiency	Oliveira, L. R. D.; Fonseca, J. R.		2018	January - March	Hematology, Transfusion and Cell Therapy	40	1	79-81	2000509356	http://dx.doi.org/10.1016/j.htct.2017.11.004	Oliveira 2018
Silent cerebral infarctions with reduced, mid-range and preserved ejection fraction in patients with heart failure	Oliveira, M. M. C.; Sampaio, E. E. S.; Kawaoka, J. R.; Hatem, M. A. B.; Camara, E. J. N.; Fernandes, A. M. S.; Oliveira-Filho, J.; Aras, R.	Heart failure predisposes to an increased risk of silent cerebral infarction, and data related to left ventricular ejection fraction are still limited. Our objective was to describe the clinical and echocardiographic characteristics and factors associated with silent cerebral infarction in patients with heart failure, according to the left ventricular ejection fraction groups. A prospective cohor…	2018	September	Arquivos Brasileiros de Cardiologia	111	3	419-422	625134732	http://dx.doi.org/10.5935/abc.20180140	Oliveira 2018
Silencing of Iron and Heme-Related Genes Revealed a Paramount Role of Iron in the Physiology of the Hematophagous Vector Rhodnius prolixus	Walter-Nuno, A. B.; Taracena, M. L.; Mesquita, R. D.; Oliveira, P. L.; Paiva-Silva, G. O.	Iron is an essential element for most organisms However, free iron and heme, its complex with protoporphyrin IX, can be extremely cytotoxic, due to the production of reactive oxygen species, eventually leading to oxidative stress. Thus, eukaryotic cells control iron availability by regulating its transport, storage and excretion as well as the biosynthesis and degradation of heme. In the genome o…	2018			9		19	29456553	https://dx.doi.org/10.3389/fgene.2018.00019	Walter-Nuno 2018
The Significance of Discordant Serology in Chagas Disease: Enhanced T-Cell Immunity to Trypanosoma cruzi in Serodiscordant Subjects	Castro Eiro, M. D.; Alvarez, M. G.; Cooley, G.; Viotti, R. J.; Bertocchi, G. L.; Lococo, B.; Albareda, M. C.; De Rissio, A. M.; Natale, M. A.; Parodi, C.; Tarleton, R. L.; Laucella, S. A.	BACKGROUND: Subjects are considered infected with Trypanosoma cruzi when tested positive by at least two out of three serological tests, whereas a positive result in only one of up to three tests is termed "serodiscordant" (SD). Assessment of parasite-specific T-cell responses may help discriminate the uninfected from infected individuals among SD subjects._x000D_METHODS: Peripheral blood mononuc…	2017		Frontiers in Immunology	8		1141	28966620	https://dx.doi.org/10.3389/fimmu.2017.01141	CastroEiro 2017
Signal Transduction Pathways as Therapeutic Target for Chagas Disease	Schoijet, A. C.; Sternlieb, T.; Alonso, G. D.	Trypanosomatids are a group of flagellated unicellular eukaryotes, which cause serious human diseases including Chagas disease (Trypanosoma cruzi), sleeping sickness (Trypanosoma brucei spp.) and Leishmaniasis (Leishmania spp.). The second messenger cAMP is involved in numerous and fundamental processes in these parasites including differentiation between stages, proliferation, osmoregulation, ox…	2019	2019-06-01	Current Medicinal Chemistry	19		19	31218950	https://dx.doi.org/10.2174/0929867326666190620093029	Schoijet 2019
Signal peptide recognition in Trypanosoma cruzi GP82 adhesin relies on its localization at protein N-terminus	Cordero, E. M.; Cortez, C.; Yoshida, N.; da Silveira, J. F.	Trypanosoma cruzi, the causative agent of Chagas disease, has a dense coat of GPI-anchored virulence factors. T. cruzi GPI-anchored adhesin GP82 is encoded by a repertoire of transcripts containing several in-frame initiation codons located up-stream from that adjacent to the predicted signal peptide (SP). Transfection of T. cruzi epimastigotes with constructs encoding GP82 starting at the SP or …	2019	2013-05-01	Scientific reports	9	1	7325	31086219	https://dx.doi.org/10.1038/s41598-019-43743-0	Cordero 2019
Sexual Transmission of American Trypanosomes from Males and Females to Naive Mates	Almeida, A. B.; Araujo, P. F.; Bernal, F. M.; Rosa, A. C.; Valente, S. A.; Teixeira, A. R. L.	American trypanosomiasis is transmitted to humans by triatomine bugs through the ingestion of contaminated food, by blood transfusions or accidently in hospitals and research laboratories. In addition, the Trypanosoma cruzi infection is transmitted congenitally from a chagasic mother to her offspring, but the male partner's contribution to in utero contamination is unknown. The findings of nests …	2019	2027-01-01	Journal of Visualized Experiments	143		27	30741253	https://dx.doi.org/10.3791/57985	Almeida 2019
Sexual reproduction in a natural Trypanosoma cruzi population	Berry, A. S. F.; Salazar-Sanchez, R.; Castillo-Neyra, R.; Borrini-Mayori, K.; Chipana-Ramos, C.; Vargas-Maquera, M.; Ancca-Juarez, J.; Naquira-Velarde, C.; Levy, M. Z.; Brisson, D.; Chagas Disease Working Group in, Arequipa	BACKGROUND: Sexual reproduction provides an evolutionary advantageous mechanism that combines favorable mutations that have arisen in separate lineages into the same individual. This advantage is especially pronounced in microparasites as allelic reassortment among individuals caused by sexual reproduction promotes allelic diversity at immune evasion genes within individuals which is often essent…	2019	May		13	5	e0007392	31107905	https://dx.doi.org/10.1371/journal.pntd.0007392	Berry 2019
Sesquiterpene lactones induce oxidative stress on trypanosoma cruzi	Barrera, P. A.; Gaia, A.; Spina, R. M.; Tello Faral, P.; Robello, C.; Cifuente, D. A.; Sosa, M. A.	Chagas disease is a parasitic infection caused by the protozoan Trypanosoma cruzi(T. cruzi) that affects about 6 million people in Latin America. Despite its sanitary importance, there are currently only two drugs available for its treatment: benznidazole and nifurtimox, both exhibiting serious adverse effects on patients. To complete its life cycle, T. cruzi should alternate between mammalian an…	2018		Biocell	3)		45-46	621858935		Barrera 2018
Serum microvesicles containing archaeal DNA as a new pathogenetic factor for heart failure in chagas' disease	De Lourdes Higuchi, M.; Kawakami, J. T.; Reis, M. M.; Oliveira, L.; Pereira, J. J.; Ianni, B.; Buck, P.; Bocchi, E. A.	Introduction: About 30% of patients with Chagas' disease (CD) develop heart failure (HF) and myocarditis, without Trypanosoma cruzi (T.cruzi) antigens suggesting action of other factors. Blood microvesicles (MV) are considered protective, but sometimes associated with bad outcome such as in HF. T.cruzi is known to have archaeal genes, suggesting they are carrying symbiotic archaea. In previous wo…	2018		Circulation. Conference	138	Supplement 1		627102171		DeLourdesHiguchi 2018
Serum cytokines and activation ex vivo of CD4+ and CD8+ T cells in chagasic chronic Mexican patients	Cruz-Robles, D.; Vargas-Alarcon, G.; Ortiz-Muniz, R.; Reyes, P. A.; Monteon, V. M.	The clinical manifestations of human Chagas disease are associated with several factors, including immunological alterations, in this regard, many studies propose that tissue damage might be more severe in the absence of immune regulatory mechanisms, other factors are the genetic background of host and parasite. Trypanosoma cruzi population is genetically, biochemistry and pathogenic diverse alon…	2017	2021-01-01	Annals of parasitology	63	4	299-308	622048027	http://dx.doi.org/10.17420/ap6304.116	Cruz-Robles 2017
Serum Active Collagenase from Pathogenic Archaeal Collagenase May Cause Heart Failure in Chagasic Patients	De Lourdes Higuchi, M.; Kawakami, J.; Ikegami, R.; Reis, M.; Moreno, C. R.; Pereira, J.; Ianni, B.; Buck, P.; Santos, M.; Bocchi, E.	Background: Microbial community has a decisive role in determining health or disease susceptibility. Archaeal genes present in Trypanosoma cruzi may represent symbionts implicated in the development of heart failure (HF) in 30% of chagasic pts. Extracellular vesicles in peripheral blood, called exosomes smaller than 0.1mum or microvesicles (MV) >0.1mum, in larger numbers in HF. We searched if som…	2019	2021-03-12	Journal of the american college of cardiology	73 (9 Supplement 1)		1021	2001642311	http://dx.doi.org/10.1016/S0735-1097%2819%2931628-6	DeLourdesHiguchi 2019
Seroprevalencia y factores de riesgo asociados a la toxoplasmosis en mujeres en edad reproductiva que acudieron al Hospital Distrital de LambarÃ©, Paraguay	Romero, Dael Abigail; GonzÃ¡lez-Vatteone, Cecilia; Guillen, Ivalena de; Aria, Laura; Meza, Teresa; Rojas, Alejandra; InfanzÃ³n, BelÃ©n; Acosta, MarÃ­a Eugenia	La toxoplasmosis es una enfermedad zoonÃ³tica de prevalencia mundial, causada por un parÃ¡sito intracelular Toxoplasma gondii que infecta a los seres vivos y tiene como hospedador definitivo a los felinos. El presente estudio tuvo como objetivo determinar la seroprevalencia de toxoplasmosis y factores de riesgo asociados en mujeres en edad reproductiva no embarazadas que asistieron al Hospital Di…	2017	2017/12	Mem. Inst. Invest. Cienc. Salud (Impr.)	15	3	83-88			Romero 2017
Searching for new drugs for Chagas diseases: triazole analogs display high in vitro activity against Trypanosoma cruzi and low toxicity toward mammalian cells	Faria, R. X.; Gonzaga, D. T. G.; Pacheco, P. A. F.; Souza, A. L. A.; Ferreira, V. F.; da Silva, F. C.	Chagas disease is one of the most relevant endemic diseases in Latin America caused by the flagellate protozoan Trypanosoma cruzi. Nifurtimox and benzonidazole are the drugs used in the treatment of this disease, but they commonly are toxic and present severe side effects. New effective molecules, without collateral effects, has promoted the investigation to develop new lead compounds with to adv…	2018	4	Journal of Bioenergetics & Biomembranes	50	2	81-91	29473131	https://dx.doi.org/10.1007/s10863-018-9746-z	Faria 2018
Search of allosteric inhibitors and associated proteins of an AKT-like kinase from trypanosoma cruzi	Ochoa, R.; Rocha-Roa, C.; Marin-Villa, M.; Robledo, S. M.; Varela, M. R. E.	Proteins associated to the PI3K/AKT/mTOR signaling pathway are widely used targets for cancer treatment, and in recent years they have also been evaluated as putative targets in trypanosomatids parasites, such as Trypanosoma cruzi. Here, we performed a virtual screening approach to find candidates that can bind regions on or near the Pleckstrin homology domain of an AKT-like protein in T. cruzi. …	2018	December	International Journal of Molecular Sciences	19 (12) (no pagination)	3951		625379135	http://dx.doi.org/10.3390/ijms19123951	Ochoa 2018
Search for recombinant trypanosoma cruzi ntpdase-1 inhibitors reveals enzyme inhibitoryaction and leishmanicidal activity of quercetin derivative	Ribeiro, I. C.; Mariotini-Moura, C.; Da Silva, W.; Souza, L. A.; Sartori, S. K.; Miranda, I. L.; Oliveira, T. A.; Almeida, M. R.; Vasconcellos, R. S.; Munoz, G. D.; Fietto, J. L. R.	Chagas disease caused by Trypanosoma cruzi is one of 13 major neglected diseases. It is estimated that there are about 6 to 7 million people infected in the world. T. cruzi has on its surface an ectonucleotidase called NTPDase-1. This enzyme is capable of hydrolyzing tri- and diphosphate nucleotides. Extracellular nucleotides play important roles in cell signaling, acting on several cellular proc…	2018	December	Purinergic Signalling	14 (1 Supplement 1)		S103	626206826	http://dx.doi.org/10.1007/s11302-018-9637-0	Ribeiro 2018
[Screening the asymptomatic traveler returning from the tropics]	Carron, C.; Cobuccio, L.; Genton, B.	When travelling to a tropical country, the tourist can be exposed to different pathogens that can cause symptoms after a long period of latency. The physician should be informed about the geographical distribution of these diseases (schistosomiasis, Chagas disease, strongyloidiasis), the situations in which an exposure can occur and the presentation of an acute or chronic infection, in order to d…	2019	2001-05-01	Revue Medicale Suisse	15	649	901-904	31050236		Carron 2019
Screening strategy for Chagas disease in a non-endemic country (Switzerland): a prospective evaluation	Da Costa-Demaurex, C.; Cardenas, M. T.; Aparicio, H.; Bodenmann, P.; Genton, B.; D'Acremont, V.	The WHO recommends screening of Latin American migrants for Chagas disease to reduce morbidity and mortality and increase the likelihood of eradicating the disease. The objective was to assess the feasibility and acceptability of a screening strategy in one Swiss canton. From February 2011 to September 2012, people attending six healthcare centres of different types were offered a rapid diagnosti…	2019	2025-03-01	Swiss Medical Weekly	149		w20050	30946480	https://dx.doi.org/10.4414/smw.2019.20050	DaCosta-Demaurex 2019
Screening of the MMV and GSK open access chemical boxes using a viability assay developed against the kinetoplastid Crithidia fasciculata	Kipandula, W.; Young, S. A.; MacNeill, S. A.; Smith, T. K.	Diseases caused by the pathogenic kinetoplastids continue to incapacitate and kill hundreds of thousands of people annually throughout the tropics and sub-tropics. Unfortunately, in the countries where these neglected diseases occur, financial obstacles to drug discovery and technical limitations associated with biochemical studies impede the development of new, safe, easy to administer and effec…	2018	6	Molecular & Biochemical Parasitology	222		61-69	29782894	https://dx.doi.org/10.1016/j.molbiopara.2018.05.001	Kipandula 2018
Screening a Natural Product-Based Library against Kinetoplastid Parasites	Zulfiqar, B.; Jones, A. J.; Sykes, M. L.; Shelper, T. B.; Davis, R. A.; Avery, V. M.	Kinetoplastid parasites cause vector-borne parasitic diseases including leishmaniasis, human African trypanosomiasis (HAT) and Chagas disease. These Neglected Tropical Diseases (NTDs) impact on some of the world's lowest socioeconomic communities. Current treatments for these diseases cause severe toxicity and have limited efficacy, highlighting the need to identify new treatments. In this study,…	2017	2012-10-01	Molecules	22	10	12	29023425	https://dx.doi.org/10.3390/molecules22101715	Zulfiqar 2017
Scientometrics analysis of research activity and collaboration patterns in Chagas cardiomyopathy	Gonzalez-Alcaide, G.; Salinas, A.; Ramos, J. M.	BACKGROUND: Chagas cardiomyopathy is a serious and common complication of Chagas disease._x000D_METHODS: Through bibliometric and Social Network Analysis, we examined patterns of research on Chagas cardiomyopathy, identifying the main countries, authors, research clusters, and topics addressed; and measuring the contribution of different countries._x000D_RESULTS: We found 1932 documents on Chagas…	2018	6		12	6	e0006602	29912873	https://dx.doi.org/10.1371/journal.pntd.0006602	Gonzalez-Alcaide 2018
A Schmidt rearrangement-mediated synthesis of novel tetrahydro-benzo[1,4]diazepin-5-ones as potential anticancer and antiprotozoal agents	Insuasty, D.; Robledo, S. M.; Velez, I. D.; Cuervo, P.; Insuasty, B.; Quiroga, J.; Nogueras, M.; Cobo, J.; Abonia, R.	Novel tetrahydro-5H-benzo[e][1,4]diazepin-5-ones, several of them, containing the quinoline pharmacophore, were synthesized via a Schmidt rearrangement from their corresponding 1,2,3,4-tetrahydro-4-quinolones mediated by the NaN<inf>3</inf>/H<inf>2</inf>SO<inf>4</inf> reaction conditions. Twelve of the obtained compounds were in vitro screened by the US National Cancer Institute (NCI) for their a…	2017	2021-12-01	European Journal of Medicinal Chemistry	141		567-583	618990164	http://dx.doi.org/10.1016/j.ejmech.2017.10.024	Insuasty 2017
[Satisfaction of Chagas disease patients attended at a pharmaceutical care service in the State of Ceara, Brazil]	Costa, A. C. D.; Candido, D. D. S.; Fidalgo, Asobv; Silva Filho, J. D. D.; Viana, C. E. M.; Lima, M. A.; Andrade, M. C.; Oliveira, M. F.	In 2005, a pharmaceutical care service was created in the State of Ceara to provide pharmacotherapeutic follow-up for individuals infected with Trypanosoma cruzi (Chagas Disease). After 10 years of operation, an evaluation was conducted to assess the degree of satisfaction of patients treated under the service. This prospective study used a questionnaire comprising the following sections: socioec…	2018	May	Cien Saude Colet	23	5	1483-1494	29768603	https://dx.doi.org/10.1590/1413-81232018235.10982016	Costa 2018
Sample Preparation of Trypanosoma cruzi Surface, Extracellular, and Nuclear Subproteomes	Ricart, C. A. O.; Queiroz, R. M. L.; Dos Santos Junior, A. C. M.; Charneau, S.	The preparation of subproteome fractions prior to proteome analysis provides both the enrichment of proteins sub-represented in global proteome analysis and information on the cellular localization of the identified proteins. Here we describe protocols for the preparation of Trypanosoma cruzi surface and extracellular and nuclear fractions for further subproteome analysis.	2019		Methods in Molecular Biology	1955		77-87	30868520	https://dx.doi.org/10.1007/978-1-4939-9148-8_6	Ricart 2019
Salivary lipocalin family proteins from Panstrongylus chinai, a vector of Chagas disease	Kato, H.; Jochim, R. C.; Gomez, E. A.; Tsunekawa, S.; Valenzuela, J. G.; Hashiguchi, Y.	The dataset in this report is related to the research article with the title: "Salivary gland transcripts of the kissing bug, Panstrongylus chinai, a vector of Chagas disease" (Kato et al., 2017) [1]. Lipocalin family proteins were identified as the dominant component in P. chinai saliva, and phylogenetic analysis of the salivary lipocalins resulted in the formation of five major clades. For furt…	2017	Dec	Data in Brief	15		272-280	29034292	https://dx.doi.org/10.1016/j.dib.2017.09.039	Kato 2017
Safety profile and efficacy of ivabradine in heart failure due to Chagas heart disease: a post hoc analysis of the SHIFT trial	Bocchi, E. A.; Rassi, S.; Guimaraes, G. V.	AIMS: The SHIFT trial showed that ivabradine reduced heart rate (HR) and the risk of cardiovascular outcomes. Concerns remain over the efficacy and safety of ivabradine on heart failure (HF) due to Chagas disease (ChD). We therefore conducted a post hoc analysis of the SHIFT trial to investigate the effect of ivabradine in these patients. METHODS AND RESULTS: SHIFT was a randomized, double-blind,…	2018	2021-06-01	ESC heart failure	5	3	249-256	624646107	http://dx.doi.org/10.1002/ehf2.12240	Bocchi 2018
Ruthenium-catalyzed C-H oxygenation of quinones by weak O-coordination for potent trypanocidal agents	Dias, G. G.; Rogge, T.; Kuniyil, R.; Jacob, C.; Menna-Barreto, R. F. S.; Da Silva Junior, E. N.; Ackermann, L.	Ruthenium-catalysis enabled the C-5 selective C-H oxygenation of naphthoquinones, and also sets the stage for the site-selective introduction of a hydroxyl group into anthraquinones. A-ring modified naphthoquinoidal compounds represent an important class of bioactive quinones for which the present study encompasses the first C-H oxygenation strategy by weak O-coordination. Copyright Â© 2018 The R…	2018		Chemical Communications	54	91	12840-12843	624897970	http://dx.doi.org/10.1039/c8cc07572g	Dias 2018
The rural-urban gradient of house infestation with triatoma infestans in an endemic municipality of the argentine Chaco Region	Gaspe, M. S.; Del Pilar Fernandez, M.; Cardinal, M. V.; Enriquez, G. F.; Rodriguez-Planes, L. I.; Macchiaverna, N. P.; Gurtler, R. E.	The Gran Chaco ecoregion is one of the main hotspots of neglected tropical diseases in the Americas, including Chagas disease. The occurrence of the major vector Triatoma infestans has historically been linked to poor rural housing, but (peri)urban infestations have been increasingly reported over recent decades. We conducted a cross-sectional survey of house infestation with T. infestans in all …	2017	November	American Journal of Tropical Medicine and Hygiene	97 (5 Supplement 1)		452	620731477		Gaspe 2017
Rural houses infestation by Triatoma infestans in northwestern Argentina: Vector control in a high spatial heterogeneous infestation area	Cavallo, M. J.; Amelotti, I.; Abrahan, L.; Cueto, G.; Gorla, D. E.	Triatoma infestans (Hemiptera: Reduviidae) is a vector of the Trypanosoma cruzi parasite, causative agent of Chagas disease. During the last decade, vector control activities have been systematically carried out in northwestern Argentina, an endemic region for this disease. The general aim of this study to evaluate was spatio-temporal variation of infestation by T. infestans in rural communities …	2018			13	8	e0201391	30071071	https://dx.doi.org/10.1371/journal.pone.0201391	Cavallo 2018
The roles of mast cells in parasitic protozoan infections	Lu, F.; Huang, S.	Protozoan parasites such as Plasmodium spp., Leishmania spp., Trypanosoma spp., and Toxoplasma gondii are major causes of parasitic diseases in both humans and animals. The immune system plays a critical role against protozoa, but their immune mechanism remains poorly understood. This highlights the need to investigate the function of immune cells involved in the process of parasite infections an…	2017	2021-04-06	Frontiers in Immunology	8 (APR) (no pagination)	363		615893763	http://dx.doi.org/10.3389/fimmu.2017.00363	Lu 2017
Role of T. cruzi exposure in the pattern of T cell cytokines among chronically infected HIV and Chagas disease patients	Tozetto-Mendoza, T. R.; Vasconcelos, D. M.; Ibrahim, K. Y.; Sartori, A. M. C.; Bezerra, R. C.; Freitas, V. L. T.; Shikanai-Yasuda, M. A.	OBJECTIVES: The impact of Chagas disease (CD) in HIV-infected patients is relevant throughout the world. In fact, the characterization of the adaptive immune response in the context of co-infection is important for predicting the need for interventions in areas in which HIV and Chagas disease co-exist._x000D_METHODS: We described and compared the frequency of cytokine-producing T cells stimulated…	2017	Nov	Clinics (Sao Paulo, Brazil)	72	11	652-660	29236910	https://dx.doi.org/10.6061/clinics/2017(11)02	Tozetto-Mendoza 2017
The role of BAFF system molecules in host response to pathogens	Sakai, J.; Akkoyunlu, M.	The two ligands B cell-activating factor of the tumor necrosis factor family (BAFF) and a proliferation-inducing ligand (APRIL) and the three receptors BAFF receptor (BAFF-R), transmembrane activator and calcium-modulating cyclophilin ligand interactor (TACI), and B cell maturation antigen (BCMA) are members of the "BAFF system molecules." BAFF system molecules are primarily involved in B cell ho…	2017	October	Clinical Microbiology Reviews	30	4	991-1014	618032967	http://dx.doi.org/10.1128/CMR.00046-17	Sakai 2017
Role of Aryl Hydrocarbon Receptor (AhR) in the Regulation of Immunity and Immunopathology During Trypanosoma cruzi Infection	Ambrosio, L. F.; Insfran, C.; Volpini, X.; Acosta Rodriguez, E.; Serra, H. M.; Quintana, F. J.; Cervi, L.; Motran, C. C.	Resistance to Trypanosoma cruzi infection is dependent on a rapid induction of Th1-type and CD8+ T cell responses that should be promptly balanced to prevent immunopathology. T. cruzi-infected B6 mice are able to control parasite replication but show a limited expansion of Foxp3+regulatory T (Treg) cells that results in the accumulation of effector immune cells and the development of acute liver …	2019		Frontiers in Immunology	10		631	30984194	https://dx.doi.org/10.3389/fimmu.2019.00631	Ambrosio 2019
The role of animal grazing in the spread of Chagas disease	Acuna-Zegarra, M. A.; Olmos-Liceaga, D.; Velasco-Hernandez, J. X.	Chagas disease is an important neglected tropical disease which causes on average about 7000 deaths per year, and an estimated 25 million people risk of acquiring it. This illness is often found in rural areas, which are usually characterized by poverty and presence of animals which act as reservoirs of the disease. Our main objective is to study the effect of animal grazing on the disease levels…	2018	2014-11-01	Journal of Theoretical Biology	457		19-28	30138633	https://dx.doi.org/10.1016/j.jtbi.2018.08.025	Acuna-Zegarra 2018
A role for trypanosomatid aldo-keto reductases in methylglyoxal, prostaglandin and isoprostane metabolism	Roberts, A. J.; Dunne, J.; Scullion, P.; Norval, S.; Fairlamb, A. H.	Trypanosomatid parasites are the infectious agents causing Chagas disease, visceral and cutaneous leishmaniasis and human African trypanosomiasis. Recent work of others has implicated an aldo-keto reductase (AKR) in the susceptibility and resistance of Trypanosoma cruzi to benznidazole, a drug used to treat Chagas disease. Here, we show that TcAKR and homologues in the related parasites Trypanoso…	2018	08 30	Biochemical Journal	475	16	2593-2610	30045874	https://dx.doi.org/10.1042/BCJ20180232	Roberts 2018
Rodolfo Viotti: clinical investigator in Chagas disease (1959-2017). [Spanish]	Leone, J. L.		2017		Medicina	77	5	443	623253853		Leone 2017
Relationship between microvascular changes, autonomic denervation, and myocardial fibrosis in Chagas cardiomyopathy: Evaluation by MRI and SPECT imaging	Barizon, G. C.; Simoes, M. V.; Schmidt, A.; Gadioli, L. P.; Murta Junior, L. O.	BACKGROUND: The relationship between microvasculopathy, autonomic denervation, and myocardial fibrosis, in Chagas cardiomyopathy is incompletely understood. The aim of this study was to explore the relative extent and anatomic distribution of myocardial hypoperfusion, autonomic denervation, and myocardial scarring using Single-Photon Emission Computerized Tomography (SPECT) imaging and Magnetic R…	2018	2025-04-01	Journal of Nuclear Cardiology	25		25	29696485	https://dx.doi.org/10.1007/s12350-018-1290-z	Barizon 2018
Relation between mast cells concentration and serotonin expression in chagasic megacolon development	Freitas, M. A. R.; Segatto, N.; Tischler, N.; de Oliveira, E. C.; Brehmer, A.; da Silveira, A. B. M.	Chagas' disease is still reaching about 10 million people in the world. In South America, one of the most severe forms of this disease is the megacolon, characterized by severe constipation, dilated sigmoid colon and rectum and severe malnutrition. Previous data suggested that mast cells and serotonin (5-hydroxytryptamine [5-HT]) expression could be involved in intestinal homeostasis control, avo…	2017	2021-03-01	Parasite Immunology	39 (3) (no pagination)	e12414		614923199	http://dx.doi.org/10.1111/pim.12414	Freitas 2017
Relation between acetylcholinesterase and Na<sup>+</sup>, K<sup>+</sup>-ATPase activities with impaired memory of mice experimentally infected by Trypanosoma cruzi	Baldissera, M. D.; Souza, C. F.; Carmo, G. M.; Monteiro, S. G.; Mendes, R. E.; Stefani, L. M.; da Silva, A. S.	Chagas disease is caused by the protozoan parasite Trypanosoma cruzi and causes severe cardiac and brain damage, leading to behavioral alterations in humans and animals. However, the mechanisms involved in memory impairment during T. cruzi infection remain unknown. It has long been recognized that the enzymatic activities of acetylcholinesterase (AChE) and Na<sup>+</sup>, K<sup>+</sup>-ATPase are…	2017	Oct	Microbial Pathogenesis	111		75-80	28823791	https://dx.doi.org/10.1016/j.micpath.2017.08.019	Baldissera 2017
Regulatory lymphoid and myeloid cells determine the cardiac immunopathogenesis of Trypanosoma cruzi infection	Fresno, M.; Girones, N.	Chagas disease is a multisystemic disorder caused by the protozoan parasite Trypanosoma cruzi, which affects ~8 million people in Latin America, killing 7,000 people annually. Chagas disease is one of the main causes of death in the endemic area and the leading cause of infectious myocarditis in the world. T. cruzi infection induces two phases, acute and chronic, where the infection is initially …	2018	2021-03-01	Frontiers in Microbiology	9 (MAR) (no pagination)	351			http://dx.doi.org/10.3389/fmicb.2018.00351	Fresno 2018
The regulation of autophagy differentially affects Trypanosoma cruzi metacyclogenesis	Vanrell, M. C.; Losinno, A. D.; Cueto, J. A.; Balcazar, D.; Fraccaroli, L. V.; Carrillo, C.; Romano, P. S.	Autophagy is a cellular process required for the removal of aged organelles and cytosolic components through lysosomal degradation. All types of eukaryotic cells from yeasts to mammalian cells have the machinery to activate autophagy as a result of many physiological and pathological situations. The most frequent stimulus of autophagy is starvation and the result, in this case, is the fast genera…	2017	Nov		11	11	e0006049	29091711	https://dx.doi.org/10.1371/journal.pntd.0006049	Vanrell 2017
Quantitative and histological assessment of maternal-fetal transmission of Trypanosoma cruzi in guinea pigs: An experimental model of congenital Chagas disease	Torres-Vargas, J.; Jimenez-Coello, M.; Guzman-Marin, E.; Acosta-Viana, K. Y.; Yadon, Z. E.; Gutierrez-Blanco, E.; Guillermo-Cordero, J. L.; Garg, N. J.; Ortega-Pacheco, A.	OBJECTIVE: We evaluated the effect of Trypanosoma cruzi infection on fertility, gestation outcome, and maternal-fetal transmission in guinea pigs (Cavia porcellus)._x000D_METHODS: Animals were infected with T. cruzi H4 strain (TcI lineage) before gestation (IBG) or during gestation (IDG). Tissue and sera samples of dams and fetuses were obtained near parturition._x000D_RESULTS: All IBG and IDG da…	2018	1		12	1	e0006222	29364882	https://dx.doi.org/10.1371/journal.pntd.0006222	Torres-Vargas 2018
Quality of life improvement in resource-limited settings after one year of second-line antiretroviral therapy use among adult men and women		Objective: We evaluated improvement of quality of life (QoL) after 1 year of secondâ€line antiretroviral therapy (ART) use in resourceâ€limited settings (RLS) among adult men and women, comparing two randomized treatment arms. Design: The AIDS Clinical Trial Group A5273 was a randomized clinical trial of secondâ€line ART comparing lopinavir/ritonavir (LPV/r) + raltegravir with LPV/r + nucleos(…	2018		AIDS (london, england)	32	5	583â€593	CN-01603632	10.1097/QAD.0000000000001738
Quality of life and associated factors in patients with chronic Chagas disease	Santos-Filho, J. C. L.; Vieira, M. C.; Xavier, I. G. G.; Maciel, E. R.; Rodrigues Junior, L. F.; Curvo, E. O. V.; Pereira, I. M.; Quintana, M. S. B.; Sperandio da Silva, G. M.; Veloso, H. H.; Mendes, F. S. N. S.; Hasslocher-Moreno, A. M.; Sousa, A. S.; do Brasil, P. E. A. A.; Saraiva, R. M.; Mediano, M. F. F.	Objectives: To evaluate the quality of life (QoL) of patients with Chagas disease (CD) and the association between QoL domains and several clinical, socioeconomic and lifestyle characteristics of this population. Method(s): Cross-sectional observational study conducted from March 2014 to March 2017 including a total of 361 outpatients followed at Evandro Chagas National Institute of Infectious Di…	2018	November	Tropical Medicine and International Health	23	11	1213-1222	623964172	http://dx.doi.org/10.1111/tmi.13144	Santos-Filho 2018
Quality of life among HIV-infected individuals failing first-line antiretroviral therapy in resource-limited settings	Torres, T. S.; Harrison, L. J.; La Rosa, A. M.; Lavenberg, J. A.; Zheng, L.; Safren, S. A.; Ngongondo, M.; Poongulali, S.; Matoga, M.; Samaneka, W.; et al.,	We evaluated healthâ€related quality of life (QoL) in HIV infection participants with virologic failure (VF) on firstâ€line antiretroviral therapy (ART) in 9 resourceâ€limited settings (RLS). ACTG SFâ€21 was completed by 512 participants at A5273 study entry; 8 domains assessed: general health perceptions (GHP), physical functioning (PF), role functioning (RF), social functioning (SF), cognit…	2018		AIDS care - psychological and socio-medical aspects of AIDS/HIV	30	8	954â€962	CN-01610557	10.1080/09540121.2018.1427207	Torres 2018
Quality control evaluation of cord blood units cryopreserved at the national center of blood transfusion, Mexico	Salazar, L.; Rojo Medina, J.; Dimas-Gonzalez, J.; De Leon-Becerra, A.	Background: Umbilical cord blood (UCB) has been widely used as a rich source of hematopoietic progenitor/stem cells (HPC/HSC) for the treatment of malignant and non-malignant diseases. UCB cells have lower probability of immune rejection, with more tolerance to differences in human leukocyte antigen (HLA). HPC/HSC are characterized by being able to self-renewal, to have a higher proliferation and…	2018	June	Vox Sanguinis	113 (Supplement 1)		332	622663581	http://dx.doi.org/10.1111/vox.12658	Salazar 2018
Production of recombinant TSA-1 and evaluation of its potential for the immuno-therapeutic control of Trypanosoma cruzi infection in mice	de la Cruz, J. J.; Villanueva-Lizama, L.; Dzul-Huchim, V.; Ramirez-Sierra, M. J.; Martinez-Vega, P.; Rosado-Vallado, M.; Ortega-Lopez, J.; Flores-Pucheta, C. I.; Gillespie, P.; Zhan, B.; Bottazzi, M. E.; Hotez, P. J.; Dumonteil, E.	A therapeutic vaccine for human Chagas disease (American trypanosomiasis caused by Trypanosoma cruzi) is under development based on the success of vaccinating mice with DNA constructs expressing the antigens Tc24 and Tc-TSA-1. However, because DNA and nucleic acid vaccines produce less than optimal responses in humans, our strategy relies on administering a recombinant protein-based vaccine, toge…	2019		Human vaccines & Immunotherapeutics	15	1	210-219	30192702	https://dx.doi.org/10.1080/21645515.2018.1520581	delaCruz 2019
Production of Recombinant Trypanosoma cruzi Antigens in Leishmania tarentolae	Ferrer, M. J.; Wehrendt, D. P.; Bonilla, M.; Comini, M. A.; Tellez-Inon, M. T.; Potenza, M.	Trypanosomatids are unicellular organisms that colonize a wide diversity of environments and hosts. For instance, Trypanosoma cruzi is a human pathogen responsible for Chagas diseases, while Leishmania tarentolae infects amphibians and became a biotechnological tool suitable for recombinant protein expression. T. cruzi antigens are needed for the development of improved epitope-based methods for …	2019		Methods in Molecular Biology	1955		105-118	30868522	https://dx.doi.org/10.1007/978-1-4939-9148-8_8	Ferrer 2019
Producing DFT/MM enzyme reaction trajectories from SCC-DFTB/MM driving forces to probe the underlying electronics of a glycosyltransferase reaction	Rogers, I. L.; Naidoo, K. J.	The SCC-DFTB/MIO/CHARMM free energy surface for a glycosyltransferase, TcTS, is benchmarked against a DFT/MM reaction trajectory using the same CHARMM MM force field ported to the NWChem package. The popular B3LYP functional, against which the MIO parameter set was parameterized is used to optimize TS structures and run DFT reaction dynamics. A novel approach was used to generate reaction forces …	2017	07 15	Journal of Computational Chemistry	38	20	1789-1798	28488320	https://dx.doi.org/10.1002/jcc.24820	Rogers 2017
Procesos educativos sobre enfermedad de Chagas con escolares de nivel bÃ¡sico de escuelas pÃºblicas de MÃ©xico	Arenas Monreal, Luz; Pacheco MagaÃ±a, Lilian E.; Bonilla FernÃ¡ndez, Pastor; Rueda Neria, Celina M.; Flores Alatorre, JosÃ© Francisco; Caballero GarcÃ­a, Cristina Raquel	Se presentan los cambios en conocimientos y prÃ¡cticas sobre el vector y la enfermedad de Chagas con escolares de MÃ©xico posterior a una intervenciÃ³n educativa. La identificaciÃ³n del vector aumentÃ³ posterior a las sesiones educativas (pre=36,15% vs post=79,30%). Aumentaron los conocimientos acerca de la enfermedad de Chagas (30,90% vs 64,72%, valor de p&lt; 0,0001) y de las acciones preventiv…	2018	2018/04	Mem. Inst. Invest. Cienc. Salud (Impr.)	16	1	14-18			ArenasMonreal 2018
Privileged Structures in the design of Potential Drug Candidates for Neglected Diseases	Leite, A. C. L.; Espindola, J. W. P.; de Oliveira Cardoso, M. V.; de Oliveira Filho, G. B.	Privileged motifs are recurring in a wide range of biologically active compounds that reach different pharmaceutical targets and pathways and could represent a suitable start point to access potential candidates in the neglected diseases field. The current therapies to treat these diseases are based in drugs that lack of the desired effectiveness, affordable methods of synthesis and allow a way t…	2017	2023-10-01	Current Medicinal Chemistry	23		23	29065822	https://dx.doi.org/10.2174/0929867324666171023163752	Leite 2017
Primary targets of the sesquiterpene lactone deoxymikanolide on Trypanosoma cruzi	Puente, V.; Laurella, L. C.; Spina, R. M.; Lozano, E.; Martino, V. S.; Sosa, M. A.; Sulsen, V. P.; Lombardo, E.	BACKGROUND: Deoxymikanolide is a sesquiterpene lactone isolated from Mikania micrantha and M. variifolia which, has previously demonstrated in vitro activity on Trypanosoma cruzi and in vivo activity on an infected mouse model._x000D_PURPOSE: Based on these promising findings, the aim of this study was to investigate the mechanism of action of this compound on different parasite targets._x000D_ME…	2019	2015-03-01	Phytomedicine	56		27-34	30668348	https://dx.doi.org/10.1016/j.phymed.2018.10.015	Puente 2019
Primary evidence of the mechanisms of action of HIV aspartyl peptidase inhibitors on Trypanosoma cruzi trypomastigote forms	Sangenito, L. S.; Menna-Barreto, R. F. S.; Oliveira, A. C.; d'Avila-Levy, C. M.; Branquinha, M. H.; Santos, A. L. S.	The development of HIV aspartyl peptidase inhibitors (HIV-PIs) and their introduction into AIDS therapy preceded a significant decrease in the incidence, morbidity and mortality of relevant protozoan co-infections. However, few data are available about how HIV-PIs act on pathogenic parasites, such as Trypanosoma cruzi, the etiological agent of Chagas disease. Therefore, the aim of the present wor…	2018	Aug	International Journal of Antimicrobial Agents	52	2	185-194	29635008	https://dx.doi.org/10.1016/j.ijantimicag.2018.03.021	Sangenito 2018
Prevention methods of foodborne Chagas disease: Disinfection, heat treatment and quality control by RT-PCR	de Oliveira, A. C.; Soccol, V. T.; Rogez, H.	The most important mode of transmission causing outbreaks of Chagas disease in the Amazon region is the oral route due to the ingestion of contaminated food. Herein, prevention methods for foodborne diseases caused by Trypanosoma cruzi, namely, sanitization, thermal treatment were investigated and the use of reverse transcription PCR (RT-PCR) amplification for the mRNA-based detection of viable T…	2019	2016-07-01	International Journal of Food Microbiology	301		34-40	31082698	https://dx.doi.org/10.1016/j.ijfoodmicro.2019.04.009	deOliveira 2019
Puerarin pre-conditioning on the expression levels of CK-MB, cTnI and inflammatory factors in patients undergoing cardiac valve replacement	Zhou, Y.; Liu, L.; Gao, C.; Liu, N.; Fa, X.	Effect of puerarin preconditioning on the expression levels of nuclear factor kappaB (NF-kappaB), interleukin 6 (IL-6), interleukin 8 (IL-8), troponin I (cTnI), and creatine kinase isoenzyme MB (CK-MB) in the neutrophils of patients undergoing cardiac valve replacement under cardiopulmonary bypass (CPB) was evaluated. We enrolled 50 patients scheduled for cardiac valve replacement and assigned th…	2019	April	Experimental and Therapeutic Medicine	17	4	2598-2602	2001633868	http://dx.doi.org/10.3892/etm.2019.7217	Zhou 2019
Publisher Correction: DIY goes in vivo	Kling, J.	In the version of this Technology Feature originally published, Andre Maia Chagas' lab affiliation was omitted and the name of his institution, The Centre for Integrative Neuroscience, was incorrectly written. This has now been corrected.	2018	8	Lab Animal	47	8	215	29973673	https://dx.doi.org/10.1038/s41684-018-0113-9	Kling 2018
Pt<sup>II</sup>, Pd<sup>II</sup> and Au<sup>III</sup> complexes with a thiosemicarbazone derived from diacethylmonooxime: Structural analysis, trypanocidal activity, cytotoxicity and first insight into the antiparasitic mechanism of action	Goncalves, A. C. R.; Carneiro, Z. A.; Oliveira, C. G.; Danuello, A.; Guerra, W.; Oliveira, R. J.; Ferreira, F. B.; Veloso-Silva, L. L. W.; Batista, F. A. H.; Borges, J. C.; de Albuquerque, S.; Deflon, V. M.; Maia, P. I. S.	New complexes of composition [MX(HL1)] (M = Pt<sup>II</sup>, Pd<sup>II</sup>, X = Cl<sup>-</sup> or I<sup>-</sup>) and [MX(L1)] (M = Au<sup>III</sup>, X = Cl<sup>-</sup>; M = Pt<sup>II</sup>, Pd<sup>II</sup>, X = PPh<sub>3</sub>) have been synthesized using a potentially tridentate thiosemicarbazone (H<sub>2</sub>L1) containing an additional oxime binding site. Among other analytical methods, all…	2017	2001-12-01	European Journal of Medicinal Chemistry	141		615-631	29107428	https://dx.doi.org/10.1016/j.ejmech.2017.10.013	Goncalves 2017
Proteomic analysis reveals different composition of extracellular vesicles released by two Trypanosoma cruzi strains associated with their distinct interaction with host cells	Ribeiro, K. S.; Vasconcellos, C. I.; Soares, R. P.; Mendes, M. T.; Ellis, C. C.; Aguilera-Flores, M.; de Almeida, I. C.; Schenkman, S.; Iwai, L. K.; Torrecilhas, A. C.	Trypanosoma cruzi, the aetiologic agent of Chagas disease, releases vesicles containing a wide range of surface molecules known to affect the host immunological responses and the cellular infectivity. Here, we compared the secretome of two distinct strains (Y and YuYu) of T. cruzi, which were previously shown to differentially modulate host innate and acquired immune responses. Tissue culture-der…	2018		Journal of Extracellular Vesicles	7	1	1463779	29696081	https://dx.doi.org/10.1080/20013078.2018.1463779	Ribeiro 2018
Proteomic analysis of glycosomes from Trypanosoma cruzi epimastigotes	Acosta, H.; Burchmore, R.; Naula, C.; Gualdron-Lopez, M.; Quintero-Troconis, E.; Caceres, A. J.; Michels, P. A. M.; Concepcion, J. L.; Quinones, W.	In Trypanosoma cruzi, the causal agent of Chagas disease, the first seven steps of glycolysis are compartmentalized in glycosomes, which are authentic but specialized peroxisomes. Besides glycolysis, activity of enzymes of other metabolic processes have been reported to be present in glycosomes, such as beta-oxidation of fatty acids, purine salvage, pentose-phosphate pathway, gluconeogenesis and …	2019	4	Molecular & Biochemical Parasitology	229		62-74	30831156	https://dx.doi.org/10.1016/j.molbiopara.2019.02.008	Acosta 2019
Proteome-Wide Analysis of Trypanosoma cruzi Exponential and Stationary Growth Phases Reveals a Subcellular Compartment-Specific Regulation	Avila, C. C.; Mule, S. N.; Rosa-Fernandes, L.; Viner, R.; Barison, M. J.; Costa-Martins, A. G.; Oliveira, G. S.; Teixeira, M. M. G.; Marinho, C. R. F.; Silber, A. M.; Palmisano, G.	Trypanosoma cruzi, the etiologic agent of Chagas disease, cycles through different life stages characterized by defined molecular traits associated with the proliferative or differentiation state. In particular, T. cruzi epimastigotes are the replicative forms that colonize the intestine of the Triatomine insect vector before entering the stationary phase that is crucial for differentiation into …	2018	2015-08-01	Genes	9	8	15	30111733	https://dx.doi.org/10.3390/genes9080413	Avila 2018
Proteome analysis of Phytomonas serpens, a phytoparasite of medical interest	Dos Santos Junior, A. C. M.; Ricart, C. A. O.; Pontes, A. H.; Fontes, W.; Souza, A. R.; Castro, M. S.; de Sousa, M. V.; de Lima, B. D.	The protozoan Phytomonas serpens (class Kinetoplastea) is an important phytoparasite that has gained medical importance due to its similarities to Trypanosoma cruzi, the etiological agent of Chagas disease. The present work describes the first proteome analysis of P. serpens. The parasite was separated into cytosolic and high density organelle fractions, which, together with total cell extract, w…	2018			13	10	e0204818	30303999	https://dx.doi.org/10.1371/journal.pone.0204818	DosSantosJunior 2018
Protein mass spectrometry extends temporal blood meal detection over polymerase chain reaction in mouse-fed Chagas disease vectors	Keller, Judith I.; Schmidt, Justin O.; Schmoker, Anna M.; Ballif, Bryan A.; Stevens, Lori	BACKGROUND Chagas disease is highly prevalent in Latin America, and vector control is the most effective control strategy to date. We have previously shown that liquid chromatography tandem mass spectrometry (LC-MS/MS) is a valuable tool for identifying triatomine vector blood meals. OBJECTIVES The purpose of this study was to determine blood meal detection ability as a function of method [polyme…	2018	2018/00	Mem. Inst. Oswaldo Cruz	113	10	e180160-e180160			Keller 2018
The Presence and Extension of Myocardial Fibrosis in the Undetermined Form of Chagas' Disease: A Study Using Magnetic Resonance	Noya-Rabelo, M. M.; Macedo, C. T.; Larocca, T.; Machado, A.; Pacheco, T.; Torreao, J.; Souza, B. S. F.; Soares, M. B. P.; Ribeiro-Dos-Santos, R.; Correia, L. C. L.	BACKGROUND: Previous data has shown that patients in the indeterminate form of Chagas disease may present myocardial fibrosis as shown on through magnetic resonance imaging (MRI). However, there is little information available regarding the degree of severity of myocardial fibrosis in these individuals. This variable has the potential to predict the evolution of Chagas' disease into its cardiac f…	2018	Feb	Arquivos Brasileiros de Cardiologia	110	2	124-131	29466491	https://dx.doi.org/10.5935/abc.20180016	Noya-Rabelo 2018
Physical Exercise Program in Chronic Chagas Heart Disease	Evandro Chagas National Institute of Infectious, Disease; National Institute of Cardiology, Laranjeiras Brazil		2017	January					NCT02517632		EvandroChagasNationalInstituteofInfectious 2017
Phospho-proteomic analysis of primary human colon epithelial cells during the early Trypanosoma cruzi infection phase	Suman, S.; Rachakonda, G.; Mandape, S. N.; Sakhare, S. S.; Villalta, F.; Pratap, S.; Lima, M. F.; Nde, P. N.	The protozoan parasite Trypanosoma cruzi, the causative agent of Chagas disease, causes severe morbidity and mortality in afflicted individuals. About 30% of T. cruzi-infected individuals present with cardiac, gastrointestinal tract, and/or neurological disorders. Megacolon, one of the major pathologies of Chagas disease, is accompanied by gastrointestinal motility disorders. The molecular mechan…	2018	9		12	9	e0006792	30222739	https://dx.doi.org/10.1371/journal.pntd.0006792	Suman 2018
Phenotypic diversity and drug susceptibility of Trypanosoma cruzi TcV clinical isolates	Quebrada Palacio, L. P.; Gonzalez, M. N.; Hernandez-Vasquez, Y.; Perrone, A. E.; Parodi-Talice, A.; Bua, J.; Postan, M.	Trypanosoma cruzi is a genetically heterogeneous group of organisms that cause Chagas disease. It has been long suspected that the clinical outcome of the disease and response to therapeutic agents are, at least in part, related to the genetic characteristics of the parasite. Herein, we sought to validate the significance of the genotype of T. cruzi isolates recovered from patients with different…	2018			13	9	e0203462	30183775	https://dx.doi.org/10.1371/journal.pone.0203462	QuebradaPalacio 2018
Phenothiazinium Dyes Are Active against Trypanosoma cruzi In Vitro	Bulhoes Portapilla, G.; Pereira, L. M.; Bronzon da Costa, C. M.; Voltarelli Providello, M.; Sampaio Oliveira, P. A.; Goulart, A.; Ferreira Anchieta, N.; Wainwright, M.; Leite Braga, G. U.; de Albuquerque, S.	Chagas disease is a tropical illness caused by the protozoan Trypanosoma cruzi. The disease affects populations of the Americas and has been spread to other continents due to the migration process. The disease is partially controlled by two drugs, Benznidazole and Nifurtimox. These molecules are active in the acute phase of the infection but are usually ineffective during the symptomatic chronic …	2019		Biomed research international	2019		8301569	31355283	https://dx.doi.org/10.1155/2019/8301569	BulhoesPortapilla 2019
Pharmacokinetic-pharmacodynamic assessment of the safety of fexinidazole for the treatment of human African trypanosomiasis	Watson, J.; Strub-Wourgraft, N.; Tarral, A.; Tarning, J.; White, N. J.	Fexinidazole is a new oral treatment for Trypanosoma brucei (T.b. gambiense) human African trypanosomiasis (g-HAT). Fexinidazole in vitro is also active against other human kinetoplastid parasites, T. cruzi and Leishmania donovani, the causative agents of Chagas disease and visceral leishmaniasis, respectively. During a dose-ranging study conducted in asymptomatic Bolivian Chagas patients, delaye…	2018	October	American Journal of Tropical Medicine and Hygiene	99 (4 Supplement)		444-445	627539720		Watson 2018
Pharmaceutical Approval Update	Kaufman, M. B.	Benznidazole for pediatric patients with Chagas disease; vestronidase alfa-vjbk (Mepsevii) for adults and children with mucopolysaccharidosis type VII; and hepatitis B vaccine (recombinant), adjuvanted (Heplisav-B), for the prevention of infection caused by all known subtypes of hepatitis B virus in adults.	2018	Feb	P & T	43	2	83-84	29386863		Kaufman 2018
Perspectives and challenges of tropical medicinal herbs and modern drug discovery in the current scenario	Kesharwani, R. K.; Misra, K.; Singh, D. B.	Tropical diseases such as malaria, tuberculosis, trypanosomiasis, and leishmaniasis, account for a large number of deaths annually. Herbs are an excellent source of tropical medicines. Many advancements and discoveries have taken place in the field of drug discovery but still, a major population of tropical diseases relies on herbal traditional medicine. There are some challenges related to polic…	2019	January	Asian Pacific Journal of Tropical Medicine	12	1	19-25	626145720	http://dx.doi.org/10.4103/1995-7645.250337	Kesharwani 2019
Peroxidase, holdase and signaling functions of Trypanosoma cruzi mitochondrial peroxiredoxin	Specker, G.; Estrada, D.; Prolo, C.; Alvarez, M. N.; Radi, R.; Piacenza, L.	The etiological agent of Chagas disease, Trypanosoma cruzi contains 2-Cys peroxiredoxins (Prx) localized in mitochondria (TcMPX) and cytosol (TcCPX) as part of its antioxidant armamentarium. The participation of these Prx in the defense towards the host and parasite-derived oxidative stress led us to postulate them as virulence factors. In addition to its peroxidase activity, 2-Cys Prx have alter…	2018	May	Free Radical Biology and Medicine	120 (Supplement 1)		S38	622993469	http://dx.doi.org/10.1016/j.freeradbiomed.2018.04.130	Specker 2018
Prevalence of Chagas disease among blood donors in Piaui State, Brazil, from 2004 to 2013. [Portuguese]	Santana, M. P.; Souza-Santos, R.; Almeida, A. S.		2018	2021-02-19	Cadernos de saude publica	34	2	e00123716	623941859	http://dx.doi.org/10.1590/0102-311X00123716	Santana 2018
Prevalence of cardiac abnormalities in Chagas disease in the general population: A systematic review and meta-analysis	Rojas Sanchez, L. Z.; Glisic, M.; Pletsch, L.; Rueda-Ochoa, O. L.; Echeverria, L. E.; Bramer, W.; Bano, A.; Stringa, N.; Zaciragic, A.; Kraja, B.; Asllanaj, E.; Franco, O. H.; Muka, T.	Background/Introduction: Chagas' disease (CD), caused by the parasite Trypanosoma cruzi, affects more than 8 million people worldwide, and is a major public health concern in North, Central and South America. Cardiac abnormalities (CA) are the main cause of morbidity in chronic CD, but whether the prevalence of overall and specific CA is different between CD and non-CD subjects, in the general po…	2017	August	European Heart Journal	38 (Supplement 1)		711	621235364	http://dx.doi.org/10.1093/eurheartj/ehx502.P3413	RojasSanchez 2017
Prevalence of antibodies against trypanosoma cruzi in pregnant women in endemic areas of the department of Boyaca, Colombia. [Spanish]	Suescun-Carrero, S. H.; Garcia-Artunduaga, C.; Valdivieso-Bohorquez, S.	Objective: To determine the prevalence of antibodies against Trypanosoma cruzi in pregnant women in endemic areas of Boyaca, Colombia, in 2012 and 2013. Materials and methods: Cross-sectional study of 566 pregnant women from endemic municipalities of Boyaca. Samples were analyzed by means of serological tests for Chagas, namely: IgG ELISA, indirect immunofluorescence and indirect hemagglutination…	2017	October-December	Iatreia	30	4	361-368	618676449	http://dx.doi.org/10.17533/udea.iatreia.v30n4a01	Suescun-Carrero 2017
Post hoc analyses of SHIFT and PARADIGM-HF highlight the importance of chronic Chagas' cardiomyopathy Comment on: â€œSafety profile and efficacy of ivabradine in heart failure due to Chagas heart disease: a post hoc analysis of the SHIFT trialâ€ by Bocchi et al			2018		ESC heart failure	5	6	1069â€1071	CN-01932176	10.1002/ehf2.12355
POEM in Latin America: The Rise of a New Standard	Kahaleh, M.; Xu, M. M.; Zamarripa, F.; Martinez, G.; Arantes, V. N.; Rodriguez, F. C.; Castillo, B.; Andalib, I.; Tyberg, A.; Lambroza, A.; Saumoy, M.; Carames, J. C.; Baptista, A.; Robles-Medranda, C.; Lukashok, H.; Gaidhane, M.; Valencia, J. M. B.; Moura, Ethd; Moura, Eghd	BACKGROUND: Per-oral endoscopic myotomy (POEM) has become the preferred alternative treatment to standard Heller myotomy for patients with esophageal achalasia, in Latin American countries. The aim of our study was to evaluate the efficacy and safety of a POEM in the management of achalasia with and without Chagas disease in patients receiving POEM._x000D_METHODS: Patients who underwent POEM from…	2019	Sep	Journal of Clinical Gastroenterology	53	8	e352-e355	30702485	https://dx.doi.org/10.1097/MCG.0000000000001161	Kahaleh 2019
Pneumatic dilation versus laparoscopic Heller's myotomy in the treatment of Achalasia: Systematic review and meta-analysis based on randomized controlled trials	Bonifacio, P.; De Moura, D. T. H.; Bernardo, W. M.; De Moura, E. T. H.; Farias, G. F. A.; Neto, A. C. M.; Lordello, M.; Korkischko, N.; Sallum, R.; De Moura, E. G. H.	Achalasia is a primary esophageal motor disorder with a variety of causes. It is most common in Central and South America, where Chagas disease is endemic. In addition to the infectious etiology, achalasia can be idiopathic, autoimmune, or drug induced. It is an incurable, progressive condition that destroys the intramural nerve plexus, causing aperistalsis of the esophageal body and impaired rel…	2019	2021-02-01	Diseases of the Esophagus	32 (2) (no pagination)	doy105		627100621	http://dx.doi.org/10.1093/dote/doy105	Bonifacio 2019
Plants of Brazilian restingas with tripanocide activity against Trypanosoma cruzi strains	Faria, R. X.; Souza, A. L. A.; Lima, B.; Tietbohl, L. A. C.; Fernandes, C. P.; Amaral, R. R.; Ruppelt, B. M.; Santos, M. G.; Rocha, L.	Chagas disease is caused by the Trypanosoma cruzi affecting millions of people, and widespread throughout Latin America. This disease exhibits a problematic chemotherapy. Benznidazole, which is the drug currently used as standard treatment, lamentably evokes several adverse reactions. Among other options, natural products have been tested to discover a novel therapeutic drug for this disease. A l…	2017	Dec	Journal of Bioenergetics & Biomembranes	49	6	473-483	29147831	https://dx.doi.org/10.1007/s10863-017-9733-9	Faria 2017
A pilot study about the preclinical vascular damage in bolivian patients with chagas in indeterminate chronic phase	Valbusa, F.; Angheben, A.; Zerbato, V.; Chiampan, A.; Agnoletti, D.; Fava, C.; Bisoffi, Z.; Arcaro, G.	Introduction: In Italy, the prevalence of seropositivity for Trypanosoma Cruzi in immigrants from endemic countries is about 11.3% (30.7% for Bolivian immigrants). The disease in its acute phase is usually asymptomatic, often leading to chronic infection that may remain silent throughout life (chronic indeterminate phase). Chagas heart disease is the most severe and frequent (20-30%) form of chro…	2017	December	High Blood Pressure and Cardiovascular Prevention	24 (4)		546-547	619557163	http://dx.doi.org/10.1007/s40292-017-0225-0	Valbusa 2017
Phytochemical Study of Salvia leriifolia Roots: Rearranged Abietane Diterpenoids with Antiprotozoal Activity	Farimani, M. M.; Khodaei, B.; Moradi, H.; Aliabadi, A.; Ebrahimi, S. N.; De Mieri, M.; Kaiser, M.; Hamburger, M.	Phytochemical investigation of the lipophilic extract of the roots of Salvia leriifolia resulted in the isolation of the new rearranged abietane diterpenoids leriifoliol (1) and leriifolione (2), together with 10 known diterpenoids. Structure elucidations were performed via extensive NMR and HRESIMS data, and the absolute configurations of compounds 1 and 3-5 were established by evaluation of exp…	2018	06 22	Journal of Natural Products	81	6	1384-1390	29896963	https://dx.doi.org/10.1021/acs.jnatprod.7b01019	Farimani 2018
Physician Knowledge, Attitudes, and Practices Related to Chagas Disease in Tabasco, Mexico	Berger, B. A.; Bartlett, A. H.; Jimenez-Hernandez, R.; Trinidad Vazquez, E.; Galindo-Sevilla, N.	We designed and implemented a survey of physician knowledge, attitudes, and practices with respect to Chagas disease in the state of Tabasco, Mexico. Seventy-eight public sector physicians from across the state responded via Research Electronic Data Capture, an online survey capture tool. Improved performance on knowledge-based questions (P < 0.01) and an increase in decisions to screen (P = 0.04…	2018	6	American Journal of Tropical Medicine & Hygiene	98	6	1743-1747	29692299	https://dx.doi.org/10.4269/ajtmh.17-0495	Berger 2018
Physical training improves exercise tolerance, cardiac function and promotes changes in neurotrophins levels in chagasic mice	Alves, R. L.; Cardoso, B. R. L.; Ramos, I. P. R.; Oliveira, B. D. S.; Dos Santos, M. L.; de Miranda, A. S.; de Almeida, T. C. S.; Vieira, M. A. R.; Machado, F. S.; Ferreira, A. J.; de Avelar, G. F.	AIMS: To investigate the effects of moderate aerobic physical training on cardiac function and morphology as well as on the levels of glial cell-derived neurotrophic factor (GDNF), nerve growth factor (NGF) and brain derived neurotrophic factor (BDNF) of animals infected with the Y strain of Trypanosoma cruzi._x000D_MAIN METHODS: Twenty-eight male C57BL/6 mice were distributed into 4 groups: sede…	2019	2001-09-01	Life Sciences	232		116629	31276687	https://dx.doi.org/10.1016/j.lfs.2019.116629	Alves 2019
MigraÃ§Ã£o boliviana e doenÃ§a de Chagas: limites na atuaÃ§Ã£o do Sistema Ãšnico de SaÃºde brasileiro (SUS)	Carneiro Junior, Nivaldo; Silveira, CÃ¡ssio; Silva, Lia Maria Brito da; Yasuda, Maria Aparecida Shikanai	MigraÃ§Ãµes acarretam mudanÃ§as nos perfis epidemiolÃ³gicos, impactando sistemas de saÃºde dos paÃ­ses receptores. O Brasil atrai imigrantes que se inserem precariamente nas metrÃ³poles. Na BolÃ­via, a doenÃ§a de Chagas Ã© endÃªmica, fato relevante para o SUS brasileiro.O texto analisa a atuaÃ§Ã£o e os limites dos profissionais de saÃºde no atendimento aos bolivianos no SUS, enfocando a doenÃ§a d…	2018	2018/03	Interface (Botucatu, Online)	22	64	87-96			CarneiroJunior 2018
Minimizing the cost of congenital chagas disease in the united states through maternal screening	Stillwaggon, E.; Perez-Zetune, V.; Sawers, L.	Chagas disease, caused by Trypanosoma cruzi, is transmitted by insect vectors, as well as through blood transfusion, organ transplant, consumption of insect feces in food and water, and from mother to child during gestation. Programs of vector control and screening of blood products and transplant organs have been successful in reducing transmission. Congenital infection, however, could perpetuat…	2017	November	American Journal of Tropical Medicine and Hygiene	97 (5 Supplement 1)		204	620729612		Stillwaggon 2017
Multicentre evaluation of a direct agglutination test prototype kit (DAT-LPC) for diagnosis of visceral leishmaniasis	Oliveira, E.; Oliveira, D.; Cardoso, F. A.; Barbosa, J. R.; Marcelino, A. P.; Dutra, T.; Araujo, T.; Fernandes, L.; Duque, D.; Rabello, A.	In this study, we assessed the sensitivity, specificity, and diagnostic accuracy of a previously developed direct agglutination test (DAT) using a freeze-dried antigen derived from Leishmania infantum promastigotes and composed in a prototype kit for visceral leishmaniasis (VL) diagnosis, named DAT-LPC. To evaluate DAT-LPC reproducibility, the kit was used to analyse 207 serum samples from VL pat…	2017	2021-12-01	Parasitology	144	14	1964-1970	617481669	http://dx.doi.org/10.1017/S0031182017001378	Oliveira 2017
Nanopore Sequencing Significantly Improves Genome Assembly of the Protozoan Parasite Trypanosoma cruzi	Diaz-Viraque, F.; Pita, S.; Greif, G.; de Souza, R. C. M.; Iraola, G.; Robello, C.	Chagas disease was described by Carlos Chagas, who first identified the parasite Trypanosoma cruzi from a 2-year-old girl called Berenice. Many T. cruzi sequencing projects based on short reads have demonstrated that genome assembly and downstream comparative analyses are extremely challenging in this species, given that half of its genome is composed of repetitive sequences. Here, we report de n…	2019	2001-07-01	Genome biology and evolution	11	7	1952-1957	31218350	https://dx.doi.org/10.1093/gbe/evz129	Diaz-Viraque 2019
Nanoparticulate drug delivery systems for the treatment of neglected tropical protozoan diseases	Volpedo, G.; Costa, L.; Ryan, N.; Halsey, G.; Satoskar, A.; Oghumu, S.	Neglected Tropical Diseases (NTDs) comprise of a group of seventeen infectious conditions endemic in many developing countries. Among these diseases are three of protozoan origin, namely leishmaniasis, Chagas disease, and African trypanosomiasis, caused by the parasites Leishmania spp., Trypanosoma cruzi, and Trypanosoma brucei respectively. These diseases have their own unique challenges which a…	2019		The Journal of Venomous Animals & Toxins Including Tropical Diseases	25		e144118	31130996	https://dx.doi.org/10.1590/1678-9199-JVATITD-1441-18	Volpedo 2019
Nanoencapsulation of benznidazole in calcium carbonate increases its selectivity to Trypanosoma cruzi	Tessarolo, L. D.; de Menezes, R. R. P. P. B.; Mello, C. P.; Lima, D. B.; Magalhaes, E. P.; Bezerra, E. M.; Sales, F. A. M.; Barroso Neto, I. L.; Oliveira, M. D. F.; dos Santos, R. P.; Albuquerque, E. L.; Freire, V. N.; Martins, A. M.	Chagas disease is a public health problem, affecting about 7 million people worldwide. Benznidazole (BZN) is the main treatment option, but it has limited effectiveness and can cause severe adverse effects. Drug delivery through nanoparticles has attracted the interest of the scientific community aiming to improve therapeutic options. The aim of this study was to evaluate the cytotoxicity of benz…	2018	2021-04-12	Parasitology			2021-08-01	621641319	http://dx.doi.org/10.1017/S0031182018000197	Tessarolo 2018
NADPH producing enzymes as promising drug targets for Chagas Disease	Cordeiro, A.	Reduced nicotinamide adenine dinucleotide phosphate (NADPH) is a cofactor used in different anabolic reactions, such as lipid and nucleic acid synthesis, and for oxidative stress defense. NADPH is essential for parasite growth and viability. In trypanosomatid parasites, NADPH is supplied by the oxidative branch of the pentose phosphate pathway and by enzymes associated with the citric acid cycle.…	2018	2009-10-01	Current Medicinal Chemistry	9		9	30306853	https://dx.doi.org/10.2174/0929867325666181009152844	Cordeiro 2018
Myoregulatory neuropeptides as ancestral communication systems: From the hydra to insects and the vertebrates	Alzugaray, M. E.; Villalobos-Sambucaro, M. J.; Ronderos, J. R.	Cell-cell interaction is a fundamental process in nature, allowing tissues and organ integration in Metazoa. Neuropeptides and their receptors are widely distributed in nature, being their presence predicted even in the genome of the ancestral species Trichoplax adhaerens. Allatotropin (AT) and Allatostatin-C (AST-C) originally characterized in insects based on their function as Juvenile Hormone …	2018		Biocell. Conference	42	Supplement 1		621687302		Alzugaray 2018
Myocardial fibrosis provides a high negative predictive value for malignant arrhythmias in Chagas disease	Jorda, P.; Vinas, D.; Regueiro, A.; Hernandez, J.; Pinazo, M. J.; Posada, E.; Arbelo, E.; Borras, R.; Caralt, M. T.; Ortiz, J. T.; Gascon, J.; Sitges, M.; Garcia-Alvarez, A.	Background: Chagas disease (ChD) is becoming a worldwide disease due to migration movements. Prognosis of Chagas cardiomyopathy is worse as compared to other aetiologies due to high risk for ventricular arrhythmias and progression to advanced heart failure. Purpose(s): To assess the role of myocardial fibrosis identified by late gadolinium enhanced in cardiac magnetic resonance (LGE-CMR) for pred…	2018	August	European Heart Journal	39 (Supplement 1)		311-312	627250045	http://dx.doi.org/10.1093/eurheartj/ehy565.P1601	Jorda 2018
Myocardial fibrosis in chagas disease and molecules related to fibrosis	Chaves, A. T.; Menezes, C. A. S.; Costa, H. S.; Nunes, M. C. P.; Rocha, M. O. C.	Chronic Chagas Cardiomyopathy (CCC) is responsible for the disease's greater morbidity and poor prognosis. Although understanding the pathophysiology of CCC and the fundamentals of its clinical management derives from research related to other carmyopathies there are peculiarities that distinguish CCC from the others. CCC is the most fibrous heart disease and its myocardial involvement is importa…	2019	2021-07-16	Parasite Immunology			e12663	628752717	http://dx.doi.org/10.1111/pim.12663	Chaves 2019
MyD88 activation in cardiomyocytes contributes to the heart immune response to acute Trypanosoma cruzi infection with no effect on local parasite control	Santana, D. Y.; Salgado, R. M.; Fevereiro, M.; Silva do Nascimento, R.; Fonseca, R.; Saraiva Camara, N. O.; Epiphanio, S.; Marinho, C. R. F.; Barreto-Chaves, M. L.; D' Imperio-Lima MR; Alvarez, J. M.	Cardiomyopathy is the most serious consequence of Chagas disease, a neglected human disorder caused by Trypanosoma cruzi infection. Because T. cruzi parasites invade cardiomyocytes, we sought to investigate whether these cells recognize the parasite in vivo by receptors signaling through the MyD88 adaptor, which mediates the activation pathway of most Toll-like receptors (TLRs) and IL-1/IL-18 rec…	2018	8		12	8	e0006617	30067739	https://dx.doi.org/10.1371/journal.pntd.0006617	Santana 2018
Mutational profile of TP53 in esophageal squamous cell carcinoma associated with chagasic megaesophagus	Lacerda, C. F.; Cruvinel-Carloni, A.; de Oliveira, A. T.; Scapulatempo-Neto, C.; Lopez, R. V.; Crema, E.; Adad, S. J.; Rodrigues, M. A.; Henry, M. A.; Guimaraes, D. P.; Reis, R. M.	Chaga's disease is an important communicable neglected disease that is gaining wider attention due to its increasing incidence worldwide. Achalasia due to chagasic megaesophagus (CM), a complication of this disease, is a known-yet, poorly understood-etiological factor for esophageal squamous cell carcinoma (ESCC) development. In this study, we aimed to perform the analysis of TP53 mutations in a …	2017	2001-04-01	Diseases of the Esophagus	30	4	2021-09-01	28375484	https://dx.doi.org/10.1093/dote/dow040	Lacerda 2017
Perfusion pattern in Chagas' disease and ventricular tachycardia	Ramirez Salazar, A.; Aguilar Rojas Luis Antonio, L.; Garay Gordobil Diego, D. R.; Jimenez Nino, A.; Alexanderson Rosas, E.	Introduction: Chagas disease, a disease of vector infectious origin caused by Trypanozoma Cruzi, and Mexico, is an area where cases of this disease are found. in the chronic stage especially where TGF-B is involved, which together with the activity of macrophages leads to diffuse myocarditis and eventually fibrosis and ventricular remodeling. Added to this; The neuronal depoblation is due to zone…	2017	May	European Heart Journal Cardiovascular Imaging	18 (Supplement 1)		i78	625227792	http://dx.doi.org/10.1093/ehjci/jex082	RamirezSalazar 2017
Performance of the vitros prototype t. cruzi assay*	Danielson, S.; Grupp, T.; Ramerman, J.; Lipshutz, H.	Chagas Disease is caused by infection with the blood-borne protozoan parasite Trypanosoma cruzi (T. cruzi). We have assessed the performance of a prototype T. cruzi Assay* on VITROS Immunodiagnostic Systems. This assay qualitatively detects antibodies to T. cruzi in human plasma and serum and is suitable for donor screening or as an aid in the diagnosis of Chagas' Disease. Antibody detection in t…	2017	June	Clinical Chemistry and Laboratory Medicine	55 (Supplement 1)		S893	616772443	http://dx.doi.org/10.1515/cclm-2017-5026	Danielson 2017
Performance of Targeted Fungal Sequencing for Culture-Independent Diagnosis of Invasive Fungal Disease	Gomez, C. A.; Budvytiene, I.; Zemek, A. J.; Banaei, N.	Background. Identification of fungi causing invasive fungal disease (IFD) is critical for guiding antifungal therapy. We describe the performance and clinical impact of a targeted panfungal polymerase chain reaction (PCR) amplicon sequencing assay for culture-independent diagnosis of IFD. Methods. Between January 2009 and September 2016, 233 specimens, consisting of fresh and formalin-fixed, para…	2017	2021-12-15	Clinical Infectious Diseases	65	12	2035-2041	620135693	http://dx.doi.org/10.1093/cid/cix728	Gomez 2017
Morte sÃºbita em DoenÃ§a de Chagas Â­conceitos atuais e perspectivas de novos avanÃ§os	PavÃ£o, Maria LÃ­cia Ribeiro Cury; Arfelli, Elerson; Leal, Marcelo Garcia; Marin Neto, JosÃ© AntÃ´nio; Schmidt, AndrÃ©	A DoenÃ§a de Chagas atinge milhÃµes de pessoas na AmÃ©rica Latina e a evoluÃ§Ã£o para cardiopatia crÃ´nica tem como seu principal desfecho a morte sÃºbita cardÃ­aca (MSC). Neste artigo, revisamos, sob a luz da medicina baseada em evidÃªncias, os principais aspectos sobre marcadores prognÃ³sticos clÃ­nicos e de imagem (especificamente a anÃ¡lise da fibrose em ressonÃ¢ncia magnÃ©tica) e terapÃªutic…	2018	2018/10	RELAMPA, Rev. Lat.-Am. Marcapasso Arritm	31	4	133-137			PavÃ£o 2018
Morte sÃºbita cardÃ­aca: perfil epidemiolÃ³gico na regiÃ£o metropolitana de GoiÃ¢nia	Menezes Junior, Antonio da Silva; Faria, Alexandre Neves de Souza; Farias, Ricardo Alves Ribeiro da	IntroduÃ§Ã£o: A morte sÃºbita cardÃ­aca Ã© um evento de grande importÃ¢ncia e repercussÃ£o na saÃºde pÃºblica e se configura como a manifestaÃ§Ã£o mais letal de uma doenÃ§a cardÃ­aca. Este estudo teve como objetivo traÃ§ar as caracterÃ­sticas da morte sÃºbita cardÃ­aca na regiÃ£o metropolitana de GoiÃ¢nia (GO).MÃ©todo: O presente estudo analisou 2.681 relatÃ³rios completos de necropsia, dos quais…	2018	2018/01	RELAMPA, Rev. Lat.-Am. Marcapasso Arritm	31	1	2021-07-02			MenezesJunior 2018
Mortality Trends for Neglected Tropical Diseases in the State of Sergipe, Brazil, 1980-2013	Costa de Albuquerque, M. A.; Dias, D. M.; Vieira, L. T.; Lima, C. A.; da Silva, A. M.	Background: Neglected Tropical Diseases are a set of communicable diseases that affect the population so low socioeconomic status, particularly 1.4 billion people who are living below the poverty level. This study has investigated the magnitude and mortality time trends for these diseases in the state of Sergipe, Northeast Region of Brazil. Methods: We conducted an ecological study of time series…	2017	2021-02-08	Infectious Diseases of Poverty	6 (1) (no pagination)	20		614311801	http://dx.doi.org/10.1186/s40249-016-0232-8	CostadeAlbuquerque 2017
Mortality Trends By Chagas Disease, From 2010 to 2015, Throughout The Brazilian Territory	Macedo, T. L. S.; Santos, C. T.; de Almeida, C. R.; Anjos, I. L. P. B.; Rebello, D. M.; Belo, G. V.; de Andrade, M. I. M. C. D. S.; Ferreira, A. S.; Rocha, M. A. D.; Vilagra, S. M. B. W.; Rabello, E.; de Aragao, A. A. B.; Aragao, I. P. B.	Introduction: Chagas disease (CD) is caused by the infection of the Trypanosoma cruzi and has important cardiac complications in its evolution. The prevalence in the Brazilian people is estimated to be 1.0 to 2.4% of the total population, reflecting the high mortality rate due to CD in the country, which represents one of the four causes of deaths from infectious and parasitic diseases. Objective…	2018	December	Global Heart	13 (4)		402	2001223844	http://dx.doi.org/10.1016/j.gheart.2018.09.095	Macedo 2018
Mortality In The Southeast of Brazil By Chagas Disease From 2010 to 2015	Macedo, T. L. S.; Santos, C. T.; de Almeida, C. R.; Anjos, I. L. P. B.; Rebello, D. M.; Belo, G. V.; Ferreira, A. S.; de Andrade, M. I. M. C. D. S.; Rocha, M. A. D.; Vilagra, S. M. B. W.; Rabello, E.; de Aragao, A. A. B.; Aragao, I. P. B.	Introduction: Chagas disease is caused by the infection of the protozoan Trypanosoma cruzi and is characterized by its important complications in the chronic phase, such as digestive, cardiac or mixed. Previously, in Brazil, the risk of transmission of the disease was approximately 36% in all Brazilian territory, reaching more than 2.450 municipalities. Nowadays, it is believed that there are abo…	2018	December	Global Heart	13 (4)		401		http://dx.doi.org/10.1016/j.gheart.2018.09.092	Macedo 2018
Mortality and cardiovascular and respiratory morbidity in individuals with impaired FEV<inf>1</inf> (PURE): an international, community-based cohort study	Duong, M.; Islam, S.; Rangarajan, S.; Leong, D.; Kurmi, O.; Teo, K.; Killian, K.; Dagenais, G.; Lear, S.; Wielgosz, A.; Nair, S.; Mohan, V.; Mony, P.; Gupta, R.; Kumar, R.; Rahman, O.; Yusoff, K.; du Plessis, J. L.; Igumbor, E. U.; Chifamba, J.; Li, W.; Lu, Y.; Zhi, F.; Yan, R.; Iqbal, R.; Ismail, N.; Zatonska, K.; Karsidag, K.; Rosengren, A.; Bahonar, A.; Yusufali, A.; Lamelas, P. M.; Avezum, A.…	Background: The associations between the extent of forced expiratory volume in 1 s (FEV<inf>1</inf>) impairment and mortality, incident cardiovascular disease, and respiratory hospitalisations are unclear, and how these associations might vary across populations is unknown. Method(s): In this international, community-based cohort study, we prospectively enrolled adults aged 35-70 years who had no…	2019	May	The Lancet Global Health	7	5	e613-e623	2001815663	http://dx.doi.org/10.1016/S2214-109X%2819%2930070-1	Duong 2019
Mini-review on CRISPR-Cas9 and its potential applications to help controlling neglected tropical diseases caused by Trypanosomatidae	Minet, C.; Thevenon, S.; Chantal, I.; Solano, P.; Berthier, D.	The CRISPR-Cas system, which was originally identified as a prokaryotic defense mechanism, is increasingly being used for the functional study of genes. This technology, which is simple, inexpensive and efficient, has aroused a lot of enthusiasm in the scientific community since its discovery, and every month many publications emanate from very different communities reporting on the use of CRISPR…	2018	September	Infection, Genetics and Evolution	63		326-331	621298032	http://dx.doi.org/10.1016/j.meegid.2018.02.030	Minet 2018
Mining Trypanosoma cruzi Genome Sequences for Antigen Discovery and Vaccine Development	Teh-Poot, C.; Dumonteil, E.	A large number of studies have demonstrated that Trypanosoma cruzi can be controlled by vaccines in animal models, but the identification of effective vaccine antigens represents one of the most critical steps in vaccine development. Thus, only a limited diversity of parasite antigens has been empirically tested as vaccine candidates. More recently, genome-to-vaccine approaches, based principally…	2019		Methods in Molecular Biology	1955		23-34	30868516	https://dx.doi.org/10.1007/978-1-4939-9148-8_2	Teh-Poot 2019
[Mining and characterization of preterm birth related genes]	Liu, X. S.; Li, W.	Preterm birth (PTB) refers to birth before 37 completed gestational weeks. PTB is the leading cause of neonatal deaths and is associated with various neonatal complications and adult-onset chronic diseases. According to twin and family studies, genetic variants account for about 15% to 35% of the incidence of PTB. However, the molecular epidemiology of PTB is still unclear. By mining the PTB-rela…	2019	2020-05-01	Yi Chuan	41	5	413-421	31106777	https://dx.doi.org/10.16288/j.yczz.19-078	Liu 2019
Minimum sample size for developing a multivariable prediction model: PART II - binary and time-to-event outcomes	Riley, R. D.; Snell, K. I. E.; Ensor, J.; Burke, D. L.; Harrell Jr, F. E.; Moons, K. G. M.; Collins, G. S.	When designing a study to develop a new prediction model with binary or time-to-event outcomes, researchers should ensure their sample size is adequate in terms of the number of participants (n) and outcome events (E) relative to the number of predictor parameters (p) considered for inclusion. We propose that the minimum values of n and E (and subsequently the minimum number of events per predict…	2019	2021-03-30	Statistics in Medicine	38	7	1276-1296	624575664	http://dx.doi.org/10.1002/sim.7992	Riley 2019
Multiple approaches to address potential risk factors of chagas disease transmission in Northeastern Brazil	Daflon-Teixeira, N. F.; Coutinho, C.; Gomes, T. F.; Toma, H. K.; Duarte, R.; Boia, M. N.; Carvalho-Costa, F. A.; Almeida, C. E.; Lima, M. M.	Chagas disease is one of the most significant systemic parasitosis in Latin America, caused by Trypanosoma cruzi, which is mainly transmitted by hematophagous insects, the triatomines. This research was carried out in both domestic and wild environments throughout a Northeastern rural locality. Triatomines were captured in both peridomicile and wild environments, obtaining 508 specimens of triato…	2019		American Journal of Tropical Medicine and Hygiene	100	2	296-302	2001880466	http://dx.doi.org/10.4269/ajtmh.18-0480	Daflon-Teixeira 2019
Multi-Parametric Evaluation of Trypanosoma cruzi Infection Outcome in Animal Models	Santi-Rocca, J.; Girones, N.; Fresno, M.	Biomarkers of infection with consistent discriminating power for diagnosis and/or prognosis are keystones for efficient therapeutic management of diseases. The protozoan Trypanosoma cruzi, the etiologic agent of Chagas disease (CD), exhibits high clinical and genetic diversity, making it difficult to define biomarkers. In animal models of infection, as well as in patients, many different outcomes…	2019		Methods in Molecular Biology	1955		187-202	30868528	https://dx.doi.org/10.1007/978-1-4939-9148-8_14	Santi-Rocca 2019
Multimodality molecular imaging in cardiac regenerative therapy	Vo, D.; Nguyen, P. K.	Stem cell therapy holds great promise for the repair and regeneration of damaged myocardium. Disappointing results from recent large-scale randomized trials using adult stem cells, however, have led some to question the efficacy of this new therapeutic. Because most clinical stem cell trials have not incorporated molecular imaging to track cell fate, it may be premature to abandon this approach. …	2017	2021-10-01	Journal of Nuclear Cardiology	24	5	1803-1809	614368414	http://dx.doi.org/10.1007/s12350-017-0785-3	Vo 2017
Multimodality imaging evaluation of Chagas disease: an expert consensus of Brazilian Cardiovascular Imaging Department (DIC) and the European Association of Cardiovascular Imaging (EACVI)	Nunes, M. C. P.; Badano, L. P.; Marin-Neto, J. A.; Edvardsen, T.; Fernandez-Golfin, C.; Bucciarelli-Ducci, C.; Popescu, B. A.; Underwood, R.; Habib, G.; Zamorano, J. L.; Saraiva, R. M.; Sabino, E. C.; Botoni, F. A.; Barbosa, M. M.; Barros, M. V. L.; Falqueto, E.; Simoes, M. V.; Schmidt, A.; Rochitte, C. E.; Rocha, M. O. C.; Ribeiro, A. L. P.; Lancellotti, P.	Aims: To develop a document by Brazilian Cardiovascular Imaging Department (DIC) and the European Association of Cardiovascular Imaging (EACVI) to review and summarize the most recent evidences about the non-invasive assessment of patients with Chagas disease, with the intent to set up a framework for standardized cardiovascular imaging to assess cardiovascular morphologic and functional disturba…	2018	04 01	European Heart Journal Cardiovascular Imaging	19	4	459-460n	29029074	https://dx.doi.org/10.1093/ehjci/jex154	Nunes 2018
Multi-criteria decision analysis and spatial statistic: an approach to determining human vulnerability to vector transmission of Trypanosoma cruzi	Montenegro, D.; Cunha, A. P. D.; Ladeia-Andrade, S.; Vera, M.; Pedroso, M.; Junqueira, A.	BACKGROUND: Chagas disease (CD), caused by the protozoan Trypanosoma cruzi, is a neglected human disease. It is endemic to the Americas and is estimated to have an economic impact, including lost productivity and disability, of 7 billion dollars per year on average. OBJECTIVES: To assess vulnerability to vector-borne transmission of T. cruzi in domiciliary environments within an area undergoing d…	2017	2021-10-01	Mem Inst Oswaldo Cruz	112	10	709-718	619170677	http://dx.doi.org/10.1590/0074-02760160523	Montenegro 2017
Trypanosoma cruzi induce macrophage expression of inflammatory factors and release of EVs that modulate infection by the parasite	Andrade, A.; Pessoa, N. L.; Campos, M. A.; Xander, P.; Soares, R. P.; Torrecilhas, A. C.	Background: The infection by the protozoan Trypanosoma cruzi, a parasite that cause Chagas' disease, modulates host innate immune response. The objective of our study was to determine if during infection, or after incubation of human macrophages with parasite extracellular vesicles (EV), these cells released EVs with immunomodulatory activity or with the capacity to affect cell invasion by the pa…	2018		Journal of Extracellular Vesicles	7 (Supplement 1)		34-35	622571917	http://dx.doi.org/10.1080/20013078.2018.1461450	Andrade 2018
Trypanosoma cruzi in a Mexican Free-Tailed Bat ( Tadarida brasiliensis) in Oklahoma, USA	Nichols, M. D.; Lord, W. D.; Haynie, M. L.; Brennan, R. E.; Jackson, V. L.; Monterroso, W. S.	Trypanosoma cruzi is a vector-borne protozoan parasite that infects seven million individuals in Central and South America and is the etiologic agent of Chagas disease. There are increasing reports of endemic transmission within the southern US. Trypanosoma cruzi occurs in wild raccoons and dogs in Oklahoma, but its endemicity in the state is poorly studied. We suspected Mexican free-tailed bats …	2019	Apr	Journal of wildlife diseases	55	2	444-448	30277832	https://dx.doi.org/10.7589/2018-04-095	Nichols 2019
Trypanosoma cruzi immunoproteome: Calpain-like CAP5.5 differentially detected throughout distinct stages of human Chagas disease cardiomyopathy	Caminha, M. A.; de Lorena, V. M. B.; de Oliveira Junior, W.; Perales, J.; Carvalho, P. C.; Lima, D. B.; Cavalcanti, Mdgam; Martins, S. M.; Valente, R. H.; Menna-Barreto, R. F. S.	Chagas disease, caused by the protozoan Trypanosoma cruzi, affects millions of people worldwide, especially in Latin America. Approximately 30% of the cases evolve to the chronic symptomatic stage due to cardiac and/or digestive damage, generally accompanied by nervous system impairment. Given the higher frequency and severity of clinical manifestations related to cardiac tissue lesion, the goal …	2019	2001-03-01	Journal of Proteomics	194		179-190	30503829	https://dx.doi.org/10.1016/j.jprot.2018.11.019	Caminha 2019
Trypanosoma cruzi extracellular amastigotes selectively trigger the PI3K/Akt and Erk pathways during HeLa cell invasion	Ferreira, B. L.; Ferreira, E. R.; Bonfim-Melo, A.; Mortara, R. A.; Bahia, D.	Cell invasion by Trypanosoma cruzi extracellular amastigotes involves different signaling pathways to induce phagocytosis-like mechanisms. Previous works indicated that PI3K/Akt, Src and Erk might be involved in EA invasion; however, participation of these molecules in this process remains elusive. Here, we observed that EA activated Akt, Erk but not Src. Interference of EA invasion with specific…	2019	2024-06-01	Microbes & Infection	24		24	31247328	https://dx.doi.org/10.1016/j.micinf.2019.06.003	Ferreira 2019
Trypanosoma cruzi Exploits Wnt Signaling Pathway to Promote Its Intracellular Replication in Macrophages	Volpini, X.; Ambrosio, L. F.; Fozzatti, L.; Insfran, C.; Stempin, C. C.; Cervi, L.; Motran, C. C.	During the acute phase of Trypanosoma cruzi infection, macrophages can act as host cells for the parasites as well as effector cells in the early anti-parasitic immune response. Thus, the targeting of specific signaling pathways could modulate macrophages response to restrict parasite replication and instruct an appropriate adaptive response. Recently, it has become evident that Wnt signaling has…	2018		Frontiers in Immunology	9		859	29743880	https://dx.doi.org/10.3389/fimmu.2018.00859	Volpini 2018
Trypanosoma cruzi epimastigotes store cholesteryl esters in lipid droplets after cholesterol endocytosis	Pereira, M. G.; Visbal, G.; Costa, T. F. R.; Frases, S.; de Souza, W.; Atella, G.; Cunha, E. Silva N.	The Chagas disease agent Trypanosoma cruzi proliferates in the insect vector as highly endocytic epimastigotes that store nutrients, including lipids in reservosomes (lysosome related compartments). Although nutrient storage is important for epimastigote transformation into infective metacyclics, the epimastigote lipid droplets (LDs) remain uncharacterized. Here, we characterized the epimastigote…	2018	9	Molecular & Biochemical Parasitology	224		2016-06-01	30016698	https://dx.doi.org/10.1016/j.molbiopara.2018.07.004	Pereira 2018
Trypanosoma cruzi down-regulates mechanosensitive proteins in cardiomyocytes	Melo, T. G.; Adesse, D.; Meirelles, M. N.; Pereira, M. C. S.	BACKGROUND: Cardiac physiology depends on coupling and electrical and mechanical coordination through the intercalated disc. Focal adhesions offer mechanical support and signal transduction events during heart contraction-relaxation processes. Talin links integrins to the actin cytoskeleton and serves as a scaffold for the recruitment of other proteins, such as paxillin in focal adhesion formatio…	2019		Mem Inst Oswaldo Cruz	114		e180593	31433004	https://dx.doi.org/10.1590/0074-02760180593	Melo 2019
To spray or not to spray? Understanding participation in an indoor residual spray campaign in Arequipa, Peru	Paz-Soldan, V. A.; Bauer, K. M.; Hunter, G. C.; Castillo-Neyra, R.; Arriola, V. D.; Rivera-Lanas, D.; Rodriguez, G. H.; Toledo Vizcarra, A. M.; Mollesaca Riveros, L. M.; Levy, M. Z.; Buttenheim, A. M.	Current low participation rates in vector control programmes in Arequipa, Peru complicate the control of Chagas disease. Using focus groups (n = 17 participants) and semi-structured interviews (n = 71) conducted in March and May 2013, respectively, we examined barriers to and motivators of household participation in an indoor residual spray (IRS) campaign that had taken place one year prior in Ar…	2018	Jan	Global Public Health	13	1	65-82	27189446	https://dx.doi.org/10.1080/17441692.2016.1178317	Paz-Soldan 2018
TMC207 for treatment of people with pulmonary tuberculosis	Rosa, B.; Cavalcanti Rolla, V.; Alves da Cunha, A. J. L.; Fernandes de Paulo, R.; Medronho, R. A.; Atallah, ÃN	Reason for withdrawal from publication This protocol was published in 2012, and does not meet current Cochrane methodological standards.	2018		Cochrane Database of Systematic Reviews		9		CD010082	10.1002/14651858.CD010082.pub2	Rosa 2018
Tissue tropism in parasitic diseases	Silva Pereira, S.; Trindade, S.; De Niz, M.; Figueiredo, L. M.	Parasitic diseases, such as sleeping sickness, Chagas disease and malaria, remain a major cause of morbidity and mortality worldwide, but particularly in tropical, developing countries. Controlling these diseases requires a better understanding of host-parasite interactions, including a deep appreciation of parasite distribution in the host. The preferred accumulation of parasites in some tissues…	2019	1931-05-01	Open Biol	9	5	190036	31088251	https://dx.doi.org/10.1098/rsob.190036	SilvaPereira 2019
Tissue and blood protozoa including toxoplasmosis, Chagas disease, leishmaniasis, Babesia, Acanthamoeba, Balamuthia, and Naegleria in solid organ transplant recipients- Guidelines from the American Society of Transplantation Infectious Diseases Community of Practice	La Hoz, R. M.; Morris, M. I.; Infectious Diseases Community of Practice of the American Society of, Transplantation	These updated guidelines from the Infectious Diseases Community of Practice of the American Society of Transplantation review the diagnosis, prevention, and management of tissue and blood protozoal infections in the pre- and post-transplant period. Significant new developments in the field have made it necessary to divide the previous single guideline published in 2013 into two sections, with the…	2019	2029-04-01	Clinical Transplantation			e13546	30900295	https://dx.doi.org/10.1111/ctr.13546	LaHoz 2019
Timeline of events	Chakradhar, S.		2017	12 07	Nature medicine	23	12	1390-1391	29216034	https://dx.doi.org/10.1038/nm1217-1390	Chakradhar 2017
Tierra Del Fuego, antarctica, and South Atlantic islands: Analysis of the Newborn screening program (1996-2016)	Yulan, C.; Dratler, G.; Lopez, C.; Horacio, A.; Caceres, S.; Moreyra, R.; Di Pietro, G.; Gramundi, I.; Campero, J.	Aim and scope: In Argentina, newborn Screening for diagnosis of phenylketonuria (PKU), congenital hypothyroidism (HC), cystic fibrosis (CFP), galactosemia (GAL), congenital adrenal hyperplasia (HSC), biotinidase deficiency (Def.B), Chagas disease, and syphilis is mandatory by national law in public and private maternities; in agreement with this law, the province of Tierra del Fuego, Antartida, a…	2017	January-December	Journal of Inborn Errors of Metabolism and Screening	5		42	623678472	http://dx.doi.org/10.1177/2326409817722292	Yulan 2017
Tick galactosyltransferases are involved in alpha-Gal synthesis and play a role during Anaplasma phagocytophilum infection and Ixodes scapularis tick vector development	Cabezas-Cruz, A.; Espinosa, P. J.; Alberdi, P.; Simo, L.; Valdes, J. J.; Mateos-Hernandez, L.; Contreras, M.; Rayo, M. V.; de la Fuente, J.	The carbohydrate Galalpha1-3Galbeta1-(3)4GlcNAc-R (alpha-Gal) is produced in all mammals except for humans, apes and old world monkeys that lost the ability to synthetize this carbohydrate. Therefore, humans can produce high antibody titers against alpha-Gal. Anti-alpha-Gal IgE antibodies have been associated with tick-induced allergy (i.e. alpha-Gal syndrome) and anti-alpha-Gal IgG/IgM antibodie…	2018	2021-09-21	Scientific reports	8	1	14224		http://dx.doi.org/10.1038/s41598-018-32664-z	Cabezas-Cruz 2018
Thromboembolic findings in patients with heart failure at autopsy	de Macedo, I. S.; Dinardi, L. F. L.; Pereira, T. V.; de Almeida, L. K. R.; Barbosa, T. S.; Benvenuti, L. A.; Ayub-Ferreira, S. M.; Bocchi, E. A.; Issa, V. S.	BACKGROUND: The risk of thromboembolic events is increased in patients with heart failure (HF); however, few studies have reported thromboembolic findings in HF patients who have undergone autopsy._x000D_METHODS AND RESULTS: We reviewed 1457 autopsies (January 2000/July 2006) and selected 595 patients with HF. We studied the occurrence of thromboembolic events in patients' autopsy reports. Mean a…	2018	Jul - Aug	Cardiovascular Pathology	35		23-28	29747049	https://dx.doi.org/10.1016/j.carpath.2018.04.004	deMacedo 2018
A Tandem Evolutionary Algorithm for Identifying Causal Rules from Complex Data	Hanley, J. P.; Rizzo, D. M.; Buzas, J. S.; Eppstein, M. J.	We propose a new evolutionary approach for discovering causal rules in complex classification problems from batch data. Key aspects include (a) the use of a hypergeometric probability mass function as a principled statistic for assessing fitness that quantifies the probability that the observed association between a given clause and target class is due to chance, taking into account the size of t…	2019	2028-02-01	Evolutionary Computation			1932-01-01	30817200	https://dx.doi.org/10.1162/evco_a_00252	Hanley 2019
Tamoxifen acts on Trypanosoma cruzi sphingolipid pathway triggering an apoptotic death process	Landoni, M.; Pinero, T.; Soprano, L. L.; Garcia-Bournissen, F.; Fichera, L.; Esteva, M. I.; Duschak, V. G.; Couto, A. S.	This study shows the effects of tamoxifen, a known estrogen receptor antagonist used in the treatment of breast cancer, on the sphingolipid pathway of Trypanosoma cruzi, searching for potential chemotherapeutic targets. A dose-dependent epimastigote growth inhibition at increasing concentration of tamoxifen was determined. In blood trypomastigotes, treatment with 10muM showed 90% lysis, while 86%…	2019	2027-08-01	Biochemical & Biophysical Research Communications	516	3	934-940	31277939	https://dx.doi.org/10.1016/j.bbrc.2019.06.149	Landoni 2019
Tropical diseases with central nervous system involvment: Typical and atypical image findings	Macedo, L.; Leite, R.; Marques, H.	Purpose: Tropical diseases encompass all diseases that occur solely, or principally, in the tropics. The objective of our study is to demonstrate the typical and atypical image findings of tropical diseases that may involve the central nervous system. Material and Methods: We performed a retrospective analysis of the cases available in our archives since 2005 and two well-known neuroradiologists …	2018		Neuroradiology	60 (1 Supplement 1)		307	621458942		Macedo 2018
Tridimensional Electron Microscopy Analysis of the Early Endosomes and Endocytic Traffic in Trypanosoma cruzi Epimastigotes	Alcantara, C. L.; de Souza, W.; da Cunha, E. Silva N. L.	Trypanosoma cruzi epimastigotes internalize macromolecules avidly by endocytosis. Previously, we identified a tubule-vesicular network likely to correspond to the early-endosomes. However, a detailed ultrastructural characterization of these endosomes was missing. Here, we combined endocytosis assays with ultrastructural data from high-resolution electron microscopy to produce a 3D analysis of ep…	2018	12	Protist	169	6	887-910	30447618	https://dx.doi.org/10.1016/j.protis.2018.09.004	Alcantara 2018
Triclosan-caffeic acid hybrids: Synthesis, leishmanicidal, trypanocidal and cytotoxic activities	Otero, E.; Garcia, E.; Palacios, G.; Yepes, L. M.; Carda, M.; Agut, R.; Velez, I. D.; Cardona, W. I.; Robledo, S. M.	The synthesis, cytotoxicity, anti-leishmanial and anti-trypanosomal activities of twelve triclosan-caffeic acid hybrids are described herein. The structure of the synthesized products was elucidated by a combination of spectrometric analyses. The synthesized compounds were evaluated against amastigotes forms of L. (V) panamensis, which is the most prevalent Leishmania species in Colombia, and aga…	2017	2001-12-01	European Journal of Medicinal Chemistry	141		73-83	29028533	https://dx.doi.org/10.1016/j.ejmech.2017.09.064	Otero 2017
Trichostatin A induces Trypanosoma cruzi histone and tubulin acetylation: effects on cell division and microtubule cytoskeleton remodelling	de Oliveira Santos, J.; Zuma, A. A.; de Luna Vitorino, F. N.; da Cunha, J. P. C.; de Souza, W.; Motta, M. C. M.	Trypanosoma cruzi, the causative agent of Chagas disease, is a public health concern in Latin America. Epigenetic events, such as histone acetylation, affect DNA topology, replication and gene expression. Histone deacetylases (HDACs) are involved in chromatin compaction and post-translational modifications of cytoplasmic proteins, such as tubulin. HDAC inhibitors, like trichostatin A (TSA), inhib…	2019	Apr	Parasitology	146	4	543-552	30421693	https://dx.doi.org/10.1017/S0031182018001828	deOliveiraSantos 2019
Triazolopyrimidines and Imidazopyridines: Structure-Activity Relationships and in Vivo Efficacy for Trypanosomiasis	Nagendar, P.; Gillespie, J. R.; Herbst, Z. M.; Ranade, R. M.; Molasky, N. M. R.; Faghih, O.; Turner, R. M.; Gelb, M. H.; Buckner, F. S.	Better therapeutics are greatly needed to treat patients infected with trypanosomatid parasites such as Trypanosoma cruzi or Trypanosoma brucei. This report describes 28 new imidazopyridines and triazolopyrimidines with potent and selective antitrypanosomal activity. Drug-like properties were demonstrated in a number of in vitro assays. In vivo efficacy was observed for <b>19</b> and <b>20</b> in…	2019	2010-01-01	ACS Medicinal Chemistry Letters	10	1	105-110	30655955	https://dx.doi.org/10.1021/acsmedchemlett.8b00498	Nagendar 2019
Triatomine Fauna and Recent Epidemiological Dynamics of Chagas Disease in an Endemic Area of Northeast Brazil	Melo, C. M.; Cruz, A. C. F. G.; Lima, A. F. V. A.; Silva, L. R.; Madi, R. R.; Jeraldo, V. D. L. S.; Mercado, R.	Updated information of the dispersion dynamics of Chagas disease (CD) and a systemic analysis of these data will aid the early identification of areas that are vulnerable to transmission and enable efficient intervention. This work synthesized spatiotemporal information regarding triatomine fauna and analyzed this information in combination with the results from serological tests to elucidate the…	2018		Canadian Journal of Infectious Diseases and Medical Microbiology	2018 (no pagination)	7020541		624440331	http://dx.doi.org/10.1155/2018/7020541	Melo 2018
[Triatominae in Palm Trees and Their Natural Infection by Trypanosoma cruzi in Regions of Eastern Venezuela]	Morocoima, A.; Barroeta, R.; Virguez, M.; Roschman-Gonzalez, A.; Chique, J. D.; Ferrer, E.; Herrera, L.	INTRODUCTION: To know the natural infestation by triatominae and their infection by Trypanosoma cruzi (T. cruzi) in Acrocomia Aculeata (A. aculeata) or coyol palm in the state of Anzoategui, Venezuela._x000D_MATERIALS AND METHODS: Triatominic infestation and its infection by T. cruzi was studied in non-affected A. aculeata in phytosanitary campaigns. The presence of the parasite was determined by…	2018	Oct-Dec	Revista Peruana de Medicina Experimental y Salud Publica	35	4	563-572	30726414	https://dx.doi.org/10.17843/rpmesp.2018.354.3871	Morocoima 2018
Triatoma vitticeps (Stal, 1859) (Hemiptera, Triatominae): A Chagas Disease Vector or a Complex of Vectors?	Alevi, K. C. C.; Garcia, A. C. C.; Guerra, A. L.; Moreira, F. F. F.; de Oliveira, J.; Aristeu da Rosa, J.; de Azeredo Oliveira, M. T. V.	Triatoma vitticeps is a Chagas disease vector that was found infected with Trypanosoma cruzi in homes. As this species is endemic from Brazil (Bahia, Espirito Santo, Minas Gerais, and Rio de Janeiro) and no study comparing the specimens from different Brazilian states was conducted, we analyzed the genetic distance (16S rDNA, Cyt b, and COI mitochondrial genes) and the chromosomal characteristics…	2018	Oct	American Journal of Tropical Medicine & Hygiene	99	4	954-956	30141391	https://dx.doi.org/10.4269/ajtmh.17-0512	Alevi 2018
Triatoma costalimai Naturally Infected by Trypanosoma cruzi: A Public Health Concern	Teves, S. C.; Toma, H. K.; Lopes, C. M.; Oliveira, B. L. N.; Carbajal-de-la-Fuente, A. L.; Souza, D. M.; Oliveira, I. A. S.; Santos-Mallet, J. R. D.; Goncalves, T. C. M.	The rupestrian Triatoma costalimai species has been found infected by Trypanosoma cruzi in wild, peridomicile, and intradomicile environments in the municipality of Aurora do Tocantins, Tocantins, Brazil. Proximity between rock outcrops increases the risk of vector transmission of Chagas disease via this species. This work describes a focus of colonization by T. costalimai specimens infected by T…	2019	Jan	American Journal of Tropical Medicine & Hygiene	100	1	90-92	30426923	https://dx.doi.org/10.4269/ajtmh.18-0419	Teves 2019
A Trial Testing Amiodarone in Chagas Cardiomiopathy	NCT03193749; FundaciÃ³n Cardioinfantil Instituto de, CardiologÃ­a; Instituto de CorazÃ³n de Bucaramanga Yes, False	ATTACH will enroll individuals with positive serology for Trypanozoma cruzi and evidence of both structrural and rythm/conduction cardiac abnormalities, as defined by any of the following inclusion criteria 1. Structural cardiac abnormality (at least one): - NTpro-BNP values &gt;125 ng/ml, or BNP values &gt; 50 ng/ml - Left ventricular ejection fraction (LVEF) &lt;50% or left diastolic diameter &…	2017								NCT03193749 2017
Trends in prevalence of HIV and syphilis in a central blood bank of Veracruz, Mexico	Lopez-Balderas, N.; Hernandez-Romano, J.; Camara-Contreras, M.; Bravo-Sarmiento, E.; Hernandez-Romano, P. A.	Syphilis and HIV infections continue to threaten the safety of blood banks in countries where altruistic donations are rare. The aim of this study of blood donors to the Centro Estatal de la Transfusion Sanguinea de Veracruz (Mexico) was to determine changes in the prevalence of syphilis and HIV, and to identify factors associated with these infections. A total of 109,054 blood donors were retros…	2019	February	Transfusion and apheresis science	58	1	94-99	2001376935	http://dx.doi.org/10.1016/j.transci.2018.12.001	Lopez-Balderas 2019
Treatment with Fenofibrate plus a low dose of Benznidazole attenuates cardiac dysfunction in experimental Chagas disease	Cevey, A. C.; Mirkin, G. A.; Donato, M.; Rada, M. J.; Penas, F. N.; Gelpi, R. J.; Goren, N. B.	Trypanosoma cruzi induces serious cardiac alterations during the chronic infection. Intense inflammatory response observed from the beginning of infection, is critical for the control of parasite proliferation and evolution of Chagas disease. Peroxisome proliferator-activated receptors (PPAR)-alpha, are known to modulate inflammation. In this study we investigated whether a PPAR-alpha agonist, Fe…	2017	12	International Journal for Parasitology -- Drugs and Drug Resistance	7	3	378-387	29040909	https://dx.doi.org/10.1016/j.ijpddr.2017.10.003	Cevey 2017
Treatment with a New Peroxisome Proliferator-Activated Receptor Gamma Agonist, Pyridinecarboxylic Acid Derivative, Increases Angiogenesis and Reduces Inflammatory Mediators in the Heart of Trypanosoma cruzi-Infected Mice	Penas, F. N.; Carta, D.; Dmytrenko, G.; Mirkin, G. A.; Modenutti, C. P.; Cevey, A. C.; Rada, M. J.; Ferlin, M. G.; Sales, M. E.; Goren, N. B.	Trypanosoma cruzi infection induces an intense inflammatory response in diverse host tissues. The immune response and the microvascular abnormalities associated with infection are crucial aspects in the generation of heart damage in Chagas disease. Upon parasite uptake, macrophages, which are involved in the clearance of infection, increase inflammatory mediators, leading to parasite killing. The…	2017		Frontiers in Immunology	8		1738	29312293	https://dx.doi.org/10.3389/fimmu.2017.01738	Penas 2017
Treatment of mucositis with combined 660- and 808-nm-wavelength low-level laser therapy reduced mucositis grade, pain, and use of analgesics: a parallel, single-blind, two-arm controlled study	Soares, R. G.; Farias, L. C.; da Silva Menezes, A. S.; de Oliveira, E. Silva C. S.; Tabosa, A. T. L.; Chagas, P. V. F.; Santiago, L.; Santos, S. H. S.; de Paula, A. M. B.; GuimarÃ£es, A. L. S.	Oral squamous cell carcinoma (OSCC) is the most frequent oral malignant neoplasia. As consequence of OSCC treatment, oral mucositis (OM) is one of the most common adverse effects of OSCC treatment. Currently, there is no consensus for OM treatment. The purpose of the current study was to test the combination of red and infrared lowâ€level laser therapy (LLLT) for OM treatment. Primary culture of…	2018		Lasers in medical science	33	8	1813â€1819	CN-01664893	10.1007/s10103-018-2549-y	Soares 2018
Travelers' tropical skin diseases: Challenges and interventions	Cunha, P. R.; Flora, T. B.; Kroumpouzos, G.	Tropical regions receive a significant part of the traveling population. It is very important that health professionals are familiar with the main tropical skin diseases and able to advice patients appropriately. This article reviews the main tropical diseases of travelers, with an emphasis on diagnosis, management, and prevention. Among others, cutaneous larva migrans, myiasis, tungiasis, Chagas…	2019		Dermatologic Therapy	32 (4) (no pagination)	e12665		623949125	http://dx.doi.org/10.1111/dth.12665	Cunha 2019
This Month in AJP	Anonymous,	The following highlights summarize research articles that are published in the current issue of The American Journal of Pathology. Copyright Â© 2018 American Society for Investigative Pathology	2018	June	American Journal of Pathology	188	6	1315	2000768387	http://dx.doi.org/10.1016/j.ajpath.2018.04.001	Anonymous 2018
The thiol-polyamine metabolism of Trypanosoma cruzi: molecular targets and drug repurposing strategies	Talevi, A.; Carrillo, C.; Comini, M. A.	Chagas' disease continues to be a challenging and neglected public health problem in many American countries. The etiologic agent, Trypanosoma cruzi, develops intracellularly in the mammalian host, which hinders treatment efficacy. Progress in the knowledge of parasite biology and host-pathogen interaction has not been paralleled by the development of novel, safe and effective therapeutic options…	2018	2026-09-01	Current Medicinal Chemistry	26		26	30259812	https://dx.doi.org/10.2174/0929867325666180926151059	Talevi 2018
Thermal Tolerance Plasticity in Chagas Disease Vectors Rhodnius prolixus (Hemiptera: Reduviidae) and Triatoma infestans	Belliard, S. A.; De la Vega, G. J.; Schilman, P. E.	Temperature is recognized as the most influential abiotic factor on the distribution and dispersion of most insect species including Rhodnius prolixus (Stal, 1859) and Triatoma infestans (Klug, 1834), the two most important Chagas disease vectors. Although, these species thermotolerance range is well known their plasticity has never been addressed in these or any other triatomines. Herein, we inv…	2019	2027-06-01	Journal of medical entomology	56	4	997-1003	30849174	https://dx.doi.org/10.1093/jme/tjz022	Belliard 2019
Therapeutical effects of vaccine from Trypanosoma cruzi amastigote surface protein 2 by simultaneous inoculation with live parasites	Ribeiro, F. A. P.; Pontes, C.; Machado, A. M. V.; Bruna-Romero, O.; Quintana, H. T.; De Oliveira, F.; De Vasconcelos, J. R. C.; Ribeiro, D. A.	The aim of this study was to evaluate the efficacy of vaccine using replication-deficient human recombinant Type 5 replication-defective adenoviruses (AdHu5) carrying sequences of the amastigote surface protein 2 (ASP2) (AdASP2) in mice infected with the Trypanosoma cruzi ( T cruzi) Y strain. A total of 16 A/Sn mice female were distributed into four groups, as follows (n = 4 per group): Group 1 -…	2019	Mar	Journal of Cellular Biochemistry	120	3	3373-3383	30246366	https://dx.doi.org/10.1002/jcb.27608	Ribeiro 2019
A therapeutic vaccine prototype induces protective immunity and reduces cardiac fibrosis in a mouse model of chronic Trypanosoma cruzi infection	Barry, M. A.; Versteeg, L.; Wang, Q.; Pollet, J.; Zhan, B.; Gusovsky, F.; Bottazzi, M. E.; Hotez, P. J.; Jones, K. M.	Chagas disease, caused by the parasite Trypanosoma cruzi, develops into chronic Chagas' cardiomyopathy in ~30% of infected individuals, characterized by conduction disorders, arrhythmias, heart failure, and even sudden cardiac death. Current anti-parasitic treatments are plagued by significant side effects and poor efficacy in the chronic phase of disease; thus, there is a pressing need for new t…	2019	May		13	5	e0007413	31145733	https://dx.doi.org/10.1371/journal.pntd.0007413	Barry 2019
A therapeutic preconceptional vaccine against Chagas disease: A novel indication that could reduce congenital transmission and accelerate vaccine development	Dumonteil, E.; Herrera, C.; Buekens, P.		2019	1		13	1	e0006985	30703092	https://dx.doi.org/10.1371/journal.pntd.0006985	Dumonteil 2019
Therapeutic effects of vaccine derived from amastigote surface protein-2 (ASP-2) against Chagas disease in mouse liver	Ribeiro, F. A. P.; Pontes, C.; Gazzinelli, R. T.; Romero, O. B.; Lazzarin, M. C.; Dos Santos, J. F.; de Oliveira, F.; Pisani, L. P.; de Vasconcelos, J. R. C.; Ribeiro, D. A.	This study investigated the efficacy of the vaccine in liver of mice infected with the Trypanosoma cruzi (T. cruzi) and immunized with AdASP-2. For this purpose, histopathological analysis and gene expression of COX-2, TNF-alpha, TNFR, iNOS, cytochrome C, caspase-3, TLR4, IL-6 and IL10 were evaluated. The following groups were used in this study: Group 1 - Control Group (CTRL) animals received Ad…	2019	Jan	Cytokine	113		285-290	30037707	https://dx.doi.org/10.1016/j.cyto.2018.07.017	Ribeiro 2019
Therapeutic drug monitoring of benznidazole and nifurtimox: a systematic review and quality assessment of published clinical practice guidelines	Olivera, M. J.; Fory, J. A.; Olivera, A. J.	The pharmacological management of adults with chronic-phase Chagas disease is challenging despite it being the recent focus of extensive research. One of the challenges in the current clinical practice guidelines (CPGs) landscape is the existence of non-evidence-based recommendations for the use of laboratory tests in treatment monitoring. This study aimed to systematically assess the quality and…	2017	Nov-Dec	Rev Soc Bras Med Trop	50	6	748-755	29340450	https://dx.doi.org/10.1590/0037-8682-0399-2016	Olivera 2017
TGF-beta Polymorphisms Are a Risk Factor for Chagas Disease	Ferreira, R. R.; Madeira, F. D. S.; Alves, G. F.; Chambela, M. D. C.; Curvo, E. O. V.; Moreira, A. D. S.; Almeida de Sa, R.; Mendonca-Lima, L.; Cabello, P. H.; Bailly, S.; Feige, J. J.; Araujo-Jorge, T. C.; Saraiva, R. M.; Waghabi, M. C.	Transforming growth factor beta1 (TGF-beta1) is an important mediator in Chagas disease. Furthermore, patients with higher TGF-beta1 serum levels show a worse clinical outcome. Gene polymorphism may account for differences in cytokine production during infectious diseases. We tested whether TGFB1 polymorphisms could be associated with Chagas disease susceptibility and severity in a Brazilian popu…	2018		Disease Markers	2018		4579198	29670670	https://dx.doi.org/10.1155/2018/4579198	Ferreira 2018
TGF-beta inhibitor therapy decreases fibrosis and stimulates cardiac improvement in a pre-clinical study of chronic Chagas' heart disease	Ferreira, R. R.; Abreu, R. D. S.; Vilar-Pereira, G.; Degrave, W.; Meuser-Batista, M.; Ferreira, N. V. C.; da Cruz Moreira, O.; da Silva Gomes, N. L.; Mello de Souza, E.; Ramos, I. P.; Bailly, S.; Feige, J. J.; Lannes-Vieira, J.; de Araujo-Jorge, T. C.; Waghabi, M. C.	TGF-beta involvement in Chagas disease cardiomyopathy has been clearly demonstrated. The TGF-beta signaling pathway is activated in the cardiac tissue of chronic phase patients and is associated with an increase in extracellular matrix protein expression. The aim of this study was to investigate the effect of GW788388, a selective inhibitor of TbetaR1/ALK5, on cardiac function in an experimental …	2019	Jul		13	7	e0007602	31365537	https://dx.doi.org/10.1371/journal.pntd.0007602	Ferreira 2019
Tetrasubstituted Imidazolium Salts as Potent Antiparasitic Agents against African and American Trypanosomiases	Ghashghaei, O.; Kielland, N.; Reves, M.; Taylor, M. C.; Kelly, J. M.; Di Pietro, O.; Munoz-Torrero, D.; Perez, B.; Lavilla, R.	Imidazolium salts are privileged compounds in organic chemistry, and have valuable biological properties. Recent studies show that symmetric imidazolium salts with bulky moieties can display antiparasitic activity against T. cruzi. After developing a facile methodology for the synthesis of tetrasubstituted imidazolium salts from propargylamines and isocyanides, we screened a small library of thes…	2018	2016-01-01	Molecules	23	1	16	29337878	https://dx.doi.org/10.3390/molecules23010177	Ghashghaei 2018
Tescalcin overexpression influences mesenchymal stem cell differentiation	Kolobynina, K. G.; Solovyeva, V. V.; Ataei, A.; Slepak, V. Z.; Rizvanov, A. A.	In previous studies EF-hand Ca<sup>2+</sup> binding protein tescalcin was shown to act as potential agent of various processes in human organism. Some researchers demonstrated that tescalcin expression contributes to megacaryocyte development and mechanism of differentiation switch in some cell lines. Considering this information it can be potentially used in biomedical applications. Here we inve…	2017		Human Gene Therapy	28 (12)		A101	620362188	http://dx.doi.org/10.1089/hum.2017.29055.abstracts	Kolobynina 2017
Terapia com cÃ©lulas-tronco mesenquimais geneticamente modificadas para superexpressÃ£o de G6GSF e IGF-1 na doenÃ§a de chagas crÃ´nica experimental	Silva, Daniela Nascimento	INTRODUÃ‡ÃƒO: A doenÃ§a de Chagas Ã© uma doenÃ§a parasitÃ¡ria causada pelo Trypanosoma cruzi, a qual representa uma das principais causas de morbimortalidade na AmÃ©rica Latina. As intervenÃ§Ãµes terapÃªuticas existentes nÃ£o sÃ£o totalmente eficazes, sendo o transplante cardÃ­aco a Ãºnica alternativa para os pacientes com cardiopatia chagÃ¡sica crÃ´nica (CCC) grave. Neste sentido, a ausÃªncia de…	2018	2018/00				85-85			Silva 2018
Techniques Used for Functional Characterization of Polyamine Transporters	Pereira, C. A.; Saye, M.; Reigada, C.; Miranda, M. R.	Transport systems are key processes in every living organism: they allow the entry of all essential nutrients into the cell and its compartments and regulate the intracellular concentrations of metabolites. The transport of cell nutrients represents the first step of many metabolic routes and may also regulate such processes. They are also responsible for reaching the effective intracellular conc…	2018		Methods in Molecular Biology	1694		225-232	29080171	https://dx.doi.org/10.1007/978-1-4939-7398-9_21	Pereira 2018
TcNST2 encodes a Golgi-localized UDP-galactose transporter in Trypanosoma cruzi	Rodrigues, E. C.; Morking, P.; Rosa, J. O.; Romagnoli, B.; Guimaraes, B. G.; Hiraiwa, P. M.; Klinke, A.; Aguiar, A. M.; Kuligoski, C.; Goldenberg, S.; Ramos, A. S. P.		2019	2013-06-01	Parasitology			1932-01-01	31190664	https://dx.doi.org/10.1017/S0031182019000738	Rodrigues 2019
TcG2/TcG4 DNA Vaccine Induces Th1 Immunity Against Acute Trypanosoma cruzi Infection: Adjuvant and Antigenic Effects of Heterologous T. rangeli Booster Immunization	Gupta, S.; Salgado-Jimenez, B.; Lokugamage, N.; Vazquez-Chagoyan, J. C.; Garg, N. J.	<b>Background:</b> Chagas cardiomyopathy is caused by Trypanosoma cruzi (Tc). Two antigenic candidates, TcG2 and TcG4, are recognized by antibodies in naturally infected dogs and humans; and these vaccine candidates provided protection from Tc infection in mice and dogs. Trypanosoma rangeli (Tr) is non-pathogenic to mammals and shown to elicit cross-reactive anti-Tc antibodies. In this study, we …	2019		Frontiers in Immunology	10		1456	31293599	https://dx.doi.org/10.3389/fimmu.2019.01456	Gupta 2019
Taxonomical over splitting in the Rhodnius prolixus (Insecta: Hemiptera: Reduviidae) clade: Are R. taquarussuensis (da Rosa et al., 2017) and R. neglectus (Lent, 1954) the same species?	Nascimento, J. D.; da Rosa, J. A.; Salgado-Roa, F. C.; Hernandez, C.; Pardo-Diaz, C.; Alevi, K. C. C.; Ravazi, A.; de Oliveira, J.; de Azeredo Oliveira, M. T. V.; Salazar, C.; Ramirez, J. D.	The use of subtle features as species diagnostic traits in taxa with high morphological similarity sometimes fails in discriminating intraspecific variation from interspecific differences, leading to an incorrect species delimitation. A clear assessment of species boundaries is particularly relevant in disease vector organisms in order to understand epidemiological and evolutionary processes that…	2019			14	2	e0211285	30730919	https://dx.doi.org/10.1371/journal.pone.0211285	Nascimento 2019
Targeting ROS overgeneration by N-benzyl-2-nitro-1-imidazole-acetamide as a potential therapeutic reposition approach for cancer therapy	Zeferino, R. C.; Mota, Nsrs; Grinevicius, Vmas; Filipe, K. B.; Sulis, P. M.; Silva, Frmb; Filho, D. W.; Pich, C. T.; Pedrosa, R. C.	BackgroundWe investigated the role of reactive oxygen species (ROS) in the anticancer mechanism of N-benzyl-2-nitro-1-imidazole-acetamide (BZN), a drug used in Chagas' disease treatment.	2019	2001-07-01	Investigational New Drugs	1		1	31257554	https://dx.doi.org/10.1007/s10637-019-00820-5	Zeferino 2019
Targeting polyamine transport in Trypanosoma cruzi	Reigada, C.; Phanstiel, O.; Miranda, M. R.; Pereira, C. A.	Polyamines play critical roles as regulators of cell growth and differentiation. In contrast with other protozoa, the human parasite Trypanosoma cruzi, the etiological agent of Chagas disease, is auxotrophic for polyamines. Therefore, their intracellular availability depends exclusively on polyamine transport and inhibition of these uptake processes can alter the viability of the parasite. The po…	2018	2021-03-10	European Journal of Medicinal Chemistry	147		2021-06-01	620488156	http://dx.doi.org/10.1016/j.ejmech.2018.01.083	Reigada 2018
Targeting host mitochondria: A role for the Trypanosoma cruzi amastigote flagellum	Lentini, G.; Dos Santos Pacheco, N.; Burleigh, B. A.	Trypanosoma cruzi is the kinetoplastid protozoan parasite that causes human Chagas disease, a chronic disease with complex outcomes including severe cardiomyopathy and sudden death. In mammalian hosts, T. cruzi colonises a wide range of tissues and cell types where it replicates within the host cell cytoplasm. Like all intracellular pathogens, T. cruzi amastigotes must interact with its immediate…	2018	Februaryy	Cellular Microbiology	20 (2) (no pagination)	e12807			http://dx.doi.org/10.1111/cmi.12807	Lentini 2018
Targeting a Large Active Site: Structure-Based Design of Nanomolar Inhibitors of Trypanosoma brucei Trypanothione Reductase	De Gasparo, R.; Halgas, O.; Harangozo, D.; Kaiser, M.; Pai, E. F.; Krauth-Siegel, R. L.; Diederich, F.	Trypanothione reductase (TR) plays a key role in the unique redox metabolism of trypanosomatids, the causative agents of human African trypanosomiasis (HAT), Chagas' disease, and leishmaniases. Introduction of a new, lean propargylic vector to a known class of TR inhibitors resulted in the strongest reported competitive inhibitor of Trypanosoma (T.) brucei TR, with an inhibition constant K<sub>i<…	2019	2013-08-01	Chemistry A European Journal	13		13	31407832	https://dx.doi.org/10.1002/chem.201901664	DeGasparo 2019
Target-based screening of the Chagas box: setting up enzymatic assays to discover specific inhibitors across bioactive compounds	Salas-Sarduy, E.; Niemirowicz, G. T.; Jose Cazzulo, J.; Alvarez, V. E.	Chagas disease is a neglected tropical illness caused by the protozoan parasite Trypanosoma cruzi. The disease is endemic in Latin America with about 6 million people infected and many more being at risk. Only two drugs are available for treatment, Nifurtimox and Benznidazole, but they have a number of side effects and are not effective in all cases. This makes urgently necessary the development …	2019	2005-07-01	Current Medicinal Chemistry	5		5	31284853	https://dx.doi.org/10.2174/0929867326666190705160637	Salas-Sarduy 2019
Synthesis and biological evaluation of 1-alkylaminomethyl-1,1-bisphosphonic acids against Trypanosoma cruzi and Toxoplasma gondii	Galaka, T.; Falcone, B. N.; Li, C.; Szajnman, S. H.; Moreno, S. N. J.; Docampo, R.; Rodriguez, J. B.	As an extension of our project aimed at the search for new chemotherapeutic agents against Chagas disease and toxoplasmosis, several 1,1-bisphosphonates were designed, synthesized and biologically evaluated against Trypanosoma cruzi and Toxoplasma gondii, the etiologic agents of these diseases, respectively. In particular, and based on the antiparasitic activity exhibited by 2-alkylaminoethyl-1,1…	2019	2015-08-01	Bioorganic & Medicinal Chemistry	27	16	3663-3673	31296439	https://dx.doi.org/10.1016/j.bmc.2019.07.004	Galaka 2019
Synthesis and Antitrypanosomal Profile of Novel Hydrazonoyl Derivatives	Santiago, N. N.; de Alcantara, G. P.; da Costa, J. S.; Carvalho, S. A.; Barbosa, J. M. C.; Salomao, K.; de Castro, S. L.; Pereira, H. M. G.; da Silva, E. F.	BACKGROUND: Approximately 5-7 million people are infected with T. cruzi in the world, and approximately 10,000 people per year die of complications linked to this disease._x000D_METHOD: This work describes the construction of a new family of hidrazonoyl substituted derivatives, structurally designed exploring the molecular hybridization between megazol and nitrofurazone. Result/Discussion: The co…	2019	2012-07-01	Medicinal chemistry	12		12	31309899	https://dx.doi.org/10.2174/1573406415666190712115237	Santiago 2019
Synthesis and antiprotozoal activity of furanchalcone-quinoline, furanchalcone-chromone and furanchalcone-imidazole hybrids	Garcia, E.; Coa, J. C.; Otero, E.; Carda, M.; Velez, I. D.; Robledo, S. M.; Cardona, W. I.	We report herein the synthesis and biological activities (cytotoxicity, leishmanicidal, and trypanocidal) of several furanchalcone-quinoline, furanchalcone-chromone, and furanchalcone-imidazole hybrids. The synthesized compounds were evaluated against amastigotes forms of L. (V) panamensis, which is the most prevalent Leishmania species in Colombia and against Trypanosoma cruzi, which is the majo…	2018	2021-02-01	Medicinal Chemistry Research	27	2	497-511	618491252	http://dx.doi.org/10.1007/s00044-017-2076-6	Garcia 2018
Synthesis and antimicrobial activities of N<sup>6</sup>-hydroxyagelasine analogs and revision of the structure of ageloximes	Paulsen, B.; Fredriksen, K. A.; Petersen, D.; Maes, L.; Matheeussen, A.; Naemi, A. O.; Scheie, A. A.; Simm, R.; Ma, R.; Wan, B.; Franzblau, S.; Gundersen, L. L.	(+)-N<sup>6</sup>-Hydroxyagelasine D, the enantiomer of the proposed structure of (-)-ageloxime D, as well as N<sup>6</sup>-hydroxyagelasine analogs were synthesized by selective N-7 alkylation of N<sup>6</sup>-[tert-butyl(dimethyl)silyloxy]-9-methyl-9H-purin-6-amine in order to install the terpenoid side chain, followed by fluoride mediated removal of the TBDMS-protecting group. N<sup>6</sup>-Hy…	2019	2021-02-15	Bioorganic and Medicinal Chemistry	27	4	620-629	2001447025	http://dx.doi.org/10.1016/j.bmc.2019.01.002	Paulsen 2019
Synergic Effect of Allopurinol in Combination with Nitroheterocyclic Compounds against Trypanosoma cruzi	Mazzeti, A. L.; Diniz, L. F.; Goncalves, K. R.; WonDollinger, R. S.; Assiria, T.; Ribeiro, I.; Bahia, M. T.	Combination therapy has gained attention as a possible strategy for overcoming the limitations of the present therapeutic arsenal for Chagas disease. The aim of this study was to evaluate the effect of allopurinol in association with nitroheterocyclic compounds on infection with the Y strain of Trypanosoma cruzi The in vitro effect of allopurinol plus benznidazole or nifurtimox on intracellular a…	2019	Jun	Antimicrobial Agents & Chemotherapy	63	6		30962342	https://dx.doi.org/10.1128/AAC.02264-18	Mazzeti 2019
Synanthropic triatomines as potential vectors of trypanosoma cruzi in central Brazil	Minuzzi-Souza, T. T. C.; Nitz, N.; Cuba, C. A. C.; Santalucia, M.; Knox, M.; Hagstrom, L.; Furtado, C. B.; Vital, T. E.; Obara, M. T.; Hecht, M. M.; Gurgel-Goncalves, R.	Introduction: Chagas disease surveillance requires current knowledge on synanthropic triatomines. We analyzed the occurrence and Trypanosoma cruzi infection rates of triatomine bugs in central Brazil, during 2012-2014. Methods: Triatomines were collected inside or around houses, and T. cruzi infection was determined by optical microscopy and conventional/quantitative polymerase chain reaction. Re…	2017	November-December	Rev Soc Bras Med Trop	50	6	824-828	620297235	http://dx.doi.org/10.1590/0037-8682-0199-2017	Minuzzi-Souza 2017
Synanthropic triatomines (Hemiptera: Reduviidae): infestation, colonization, and natural infection by trypanosomatids in the State of Rio Grande do Norte, Brazil	Barbosa-Silva, A. N.; Souza, R. C. M.; Diotaiuti, L.; Aguiar, L. M. A.; Camara, Acjd; Galvao, Lmdc; Chiari, E.	INTRODUCTION: The ecoepidemiological situation in the State of Rio Grande do Norte, Brazil is characterized by frequent invasion and colonization of domiciliary units (DUs) by several triatomine species, with high rates of natural infection by Trypanosoma cruzi. METHODS: We evaluated the possibility of vector transmission of T. cruzi based on records of the occurrence of domiciled triatomines col…	2019	2018-07-01	Rev Soc Bras Med Trop	52		e20190061	31340365	https://dx.doi.org/10.1590/0037-8682-0061-2019	Barbosa-Silva 2019
Sympatry influence in the interaction of Trypanosoma cruzi with triatomine	Dworak, E. S.; Araujo, S. M.; Gomes, M. L.; Massago, M.; Ferreira, E. C.; Toledo, M. J. O.	INTRODUCTION: Trypanosoma cruzi, the etiologic agent of Chagas disease, is widely distributed in nature, circulating between triatomine bugs and sylvatic mammals, and has large genetic diversity. Both the vector species and the genetic lineages of T. cruzi present a varied geographical distribution. This study aimed to verify the influence of sympatry in the interaction of T. cruzi with triatomin…	2017	Sep-Oct	Rev Soc Bras Med Trop	50	5	629-637	29160509	https://dx.doi.org/10.1590/0037-8682-0219-2017	Dworak 2017
MICU1 and MICU2 Play an Essential Role in Mitochondrial Ca<sup>2+</sup> Uptake, Growth, and Infectivity of the Human Pathogen Trypanosoma cruzi	Bertolini, M. S.; Chiurillo, M. A.; Lander, N.; Vercesi, A. E.; Docampo, R.	The mitochondrial Ca<sup>2+</sup> uptake in trypanosomatids, which belong to the eukaryotic supergroup Excavata, shares biochemical characteristics with that of animals, which, together with fungi, belong to the supergroup Opisthokonta. However, the composition of the mitochondrial calcium uniporter (MCU) complex in trypanosomatids is quite peculiar, suggesting lineage-specific adaptations. In th…	2019	05 07	mBio	10	3	7	31064825	https://dx.doi.org/10.1128/mBio.00348-19	Bertolini 2019
Microvesicles released during the interaction between Trypanosoma cruzi TcI and TcII strains and host blood cells inhibit complement system and increase the infectivity of metacyclic forms of host cells in a strain-independent process	Wyllie, M. P.; Ramirez, M. I.	Extracellular vesicles, whether microvesicles (MVs) or exosomes, shed by pathogens transfer virulence factors and biomolecules to host cells, thereby altering the host's susceptibility to infection. We have previously demonstrated that MV release is increased during the interaction between the infective forms of Trypanosoma cruzi and host cells. MVs confer parasite resistance to complement-mediat…	2017	2021-10-01	Pathogens and Disease	75 (7) (no pagination)	ftx077		619562249	http://dx.doi.org/10.1093/femspd/ftx077	Wyllie 2017
Metabarcoding, a new approach for the comprehensive study of trypanosoma cruzi transmission cycles and triatomine behavior	Dumonteil, E.; Ramirez-Sierra, M. J.; Perez-Carrillo, S.; Teh-Poot, C.; Herrera, C.; Gourbiere, S.; Waleckx, E.	Chagas disease, caused by the parasite Trypanosoma cruzi, is mainly transmitted to humans and other mammals by blood-sucking insects called triatomines. Establishing transmission cycles is key to understand the epidemiology of the disease, but integrative assessments of ecological interactions shaping parasite transmission are still limited. Current approaches also lack sensitivity to assess the …	2018	October	American Journal of Tropical Medicine and Hygiene	99 (4 Supplement)		40	627540254		Dumonteil 2018
Messenger RNA levels of the Polo-like kinase gene (PLK) correlate with cytokinesis in the Trypanosoma rangeli cell cycle	Prestes, E. B.; Stoco, P. H.; de Moraes, M. H.; Moura, H.; Grisard, E. C.	BACKGROUND: Trypanosoma rangeli is a protozoan parasite that is non-virulent to the mammalian host and is morphologically and genomically related to Trypanosoma cruzi, whose proliferation within the mammalian host is controversially discussed._x000D_OBJECTIVES: We aimed to investigate the T. rangeli cell cycle in vitro and in vivo by characterizing the timespan of the parasite life cycle and by p…	2019	2022-07-01	Experimental Parasitology	204		107727	31344389	https://dx.doi.org/10.1016/j.exppara.2019.107727	Prestes 2019
Mesenchymal Stem Cells in Patients With Type 1 Diabetes Mellitus	Nct,	Adipose tissue samples will be obtain through liposuction procedures of three healthy volunteers undergoing aesthetic surgery at Clementino Fraga Filho (the hospital of Federal University of Rio de Janeiro, Brazil). DonorsÂ´sorology wil have to be negative for syphilis, Chagas disease, Hepatitis B virus, Hepatitis C, HIV 1 and 2, and Cytomegalovirus. The adipose tissueâ€derived stem/stromal cell…	2019		Https://clinicaltrials.gov/show/nct03920397				CN-01931440		Nct 2019
Megaesophagus and achalasia as part of the MEN2B syndrome	Falcao, C. K.; Castro Neves, L. A.; Maciel, A. W.; Ferreira, E. R.; Correa, F.; Lima Junior, J. V.; Farias, E. C.; Hoff, A. O.	Multiple endocrine neoplasia type 2 syndrome (MEN2) is an autosomal dominant disorder caused by germline mutations of RET proto-oncogene. It is divided according to clinical presentation in MEN2A and MEN2B (5% of cases). MEN2B is the most aggressive form characterized by medullar thyroid carcinoma (MTC), pheochromocytoma, gastrointestinal ganglioneuromatosis and marfanoid body habitus. Achalasia …	2018	October	Thyroid	28 (Supplement 1)		A146-A147	625235496	http://dx.doi.org/10.1089/thy.2018.29065.abstracts	Falcao 2018
Medical pluralism in maternal health-seeking behavior of rural women in Southern Ecuador	Arnold, J.; Flint, J.; Casapulla, S.; Nieto, C.; Grijalva, M. J.	In rural Ecuador pregnant women face complex challenges navigating the terrain between traditional and biomedical maternal health care services. Semi-structured interviews were conducted in three rural communities in Southern Ecuador that have presented active Chagas disease transmission with women who were pregnant or have given birth within the last five years. This study was conducted to ident…	2019	2006-08-01	Health Care for Women International			2018-01-01	31385747	https://dx.doi.org/10.1080/07399332.2019.1642891	Arnold 2019
Mechanical Supplementation With the Stromal Vascular Fraction Yields Improved Volume Retention in Facial Lipotransfer: a 1-Year Comparative Study	Gontijo-de-Amorim, N. F.; Charles-de-SÃ¡, L.; Rigotti, G.	Background: Unpredictable volume maintenance in the long term is a major limitation of autologous fat grafting. Objectives: The authors compared results of autologous lipotransfer to the face with or without enrichment of fat with the stromal vascular fraction (SVF). Methods: Thirty patients with asymmetric depletion of facial volume were included in a prospective study. Patients were randomly as…	2017		Aesthetic surgery journal	37	9	975â€985	CN-01422044	10.1093/asj/sjx115	Gontijo-de-Amorim 2017
Measurement of multiple cytokines for discrimination and risk stratification in patients with chagas disease and idiopathic dilated cardiomyopathy	Adnan Khan, A.; Wang, Y.; Wessel, N.; Schultheiss, H. P.; Moreira, M. D. A. C.; Walther, T.	Introduction: Chagas' disease (CD), caused by the hemoflagellate protozoan, Trypanosoma cruzi, is endemic in most countries of South and Central America, where it continues to be a major source of social, health, and financial burden. Heart failure (HF) is often a late manifestation of chronic CD, and is associated with high morbidity and mortality. Early identification of patients with CD, there…	2018	May	European journal of heart failure	20 (Supplement 1)		246-247	622651041	http://dx.doi.org/10.1002/ejhf.1197	AdnanKhan 2018
Measurement of multiple cytokines for diagnosis and prognosis of chagas' disease and idiopathic dilated cardiomyopathy	Khan, A. D. N. A. N.; Wang, Y. O. N. G.; Wessel, N. I. E. L. S.; Scultheiss, H. P.; Consolacao, M. D. V.; Walther, T. H. O. M. A. S.	Introduction: Chagas' disease (CD), caused by the hemoflagellate protozoan, Trypanosoma cruzi, is endemic in most countries of South and Central America, where it continues to be a major source of social, health, and financial burden. Cardiac involvement is the most frequent and serious manifestation of chronic CD, and typically leads to heart failure (HF), arrhythmias, thromboembolism, and sudde…	2017	May	European journal of heart failure	19 (Supplement 1)		50	616172578	http://dx.doi.org/10.1002/ejhf.833	Khan 2017
Mauricio B. Rosenbaum and the Argentinian School of Electrocardiography	Elizari, M. V.		2018	March	Journal of Electrocardiology	51	2	346-353	619136730	http://dx.doi.org/10.1016/j.jelectrocard.2017.10.003	Elizari 2018
Maternal risk factors for the transmission of congenital chagas disease	SuasnÃ¡bar, Santiago MartÃ­n; Olivera, Lorena VerÃ³nica; Bizai, Maria Laura; Arias, Evelyn Elizabeth; Denner, Susana; Fabbro, Diana Lucrecia	The present article looks at the association between the epidemiological history of women infected with Trypanosoma cruzi and the risk of vertical transmission. Eighty-three chronically infected mothers and their 237 children were studied, using a cohort design. All patients reside in Santa Fe city, Argentina. Twenty-five women transmitted the infection to 38 children. The potential risk factors …	2018	2018/09	Rev. patol. trop	47	3	133-144			SuasnÃ¡bar 2018
[Maternal factors associated to congenital transmission of Chagas disease in children born and siblings in Chaco province, Argentina.]	Chaparro, R. M.; Genero, S.	Introduction: After vector-borne transmission, the congenital form is the most important to maintain the endemic. The probability of congenital transmission may depend on factors that vary between different countries and geographic areas. This study was carried out with the objective of estimating the proportion of congenital transmission of Chagas disease and maternal factors associated to the T…	2018	12 27	Revista de la Facultad de Ciencias Medicas de Cordoba	75	4	279-287	30734707	https://dx.doi.org/10.31053/1853.0605.v75.n4.21260	Chaparro 2018
Microvascular Endothelial Function in a Cohort of Patients With the Cardiac Form of Chronic Chagas Disease.	NCT03524768; National Institute of Cardiology, Laranjeiras Brazil	Inclusion Criteria: - patients presenting with Chagas cardiomyopathy Exclusion Criteria: - diabetes <Condition>Chagas Cardiomyopathy</Condition>_x000D_Diagnostic Test: skin laser speckle contrast imaging and video-capillaroscopy_x000D_Endothelium-dependent skin microvascular function_x000D_Endothelium-dependent skin capillary density	2018								NCT03524768 2018
Microbiomes of North American Triatominae: The Grounds for Chagas Disease Epidemiology	Rodriguez-Ruano, S. M.; Skochova, V.; Rego, R. O. M.; Schmidt, J. O.; Roachell, W.; Hypsa, V.; Novakova, E.	Insect microbiomes influence many fundamental host traits, including functions of practical significance such as their capacity as vectors to transmit parasites and pathogens. The knowledge on the diversity and development of the gut microbiomes in various blood feeding insects is thus crucial not only for theoretical purposes, but also for the development of better disease control strategies. In…	2018		Frontiers in Microbiology	9		1167	29951039	https://dx.doi.org/10.3389/fmicb.2018.01167	Rodriguez-Ruano 2018
Methodological approach to the ex vivo expansion and detection of T. cruzi-specific T cells from chronic Chagas disease patients	Acevedo, G. R.; Longhi, S. A.; Bunying, A.; Sabri, N.; Atienza, A.; Zago, M. P.; Santos, R.; Judkowski, V. A.; Pinilla, C.; Gomez, K. A.	The discovery of T cell epitopes is essential not only for gaining knowledge about host response to infectious disease but also for the development of immune-intervention strategies. In Chagas disease, given the size and complexity of the Trypanosoma cruzi proteome and its interaction with the host's immune system, the fine specificity of T cells has not been extensively studied yet, and this is …	2017	May	PLoS One	12 (5) (no pagination)	e0178380		616383089	http://dx.doi.org/10.1371/journal.pone.0178380	Acevedo 2017
Metal Compounds in the Development of Antiparasitic Agents: Rational Design from Basic Chemistry to the Clinic	Gambino, D.; Otero, A. L.	Metal compounds seem to be a promising approach in the search of new therapeutic solutions for neglected tropical diseases. In this chapter, efforts in the design of prospective metal-based drugs for the treatment of Chagas disease, human African trypanosomiasis, and leishmaniasis are discussed. Careful selection of the metal center (including organometallic cores) and the types and number of coo…	2019		Metal ions in life sciences	19	no pagination		626720249	http://dx.doi.org/10.1515/9783110527872-019	Gambino 2019
Metabolic Labeling of Surface Neo-sialylglyconjugates Catalyzed by Trypanosoma cruzi trans-Sialidase	Carlevaro, G.; Lantos, A. B.; Canepa, G. E.; de Los Milagros Camara, M.; Somoza, M.; Buscaglia, C. A.; Campetella, O.; Mucci, J.	Trypanosoma cruzi, the protozoan agent of Chagas disease, has evolved an innovative metabolic pathway by which protective sialic acid (SA) residues are scavenged from host sialylglycoconjugates and transferred onto parasite surface mucin-like molecules (or surface glycoconjugates from host target cells) by means of a unique trans-sialidase (TS) enzyme. TS-induced changes in the glycoprotein sialy…	2019		Methods in Molecular Biology	1955		135-146	30868524	https://dx.doi.org/10.1007/978-1-4939-9148-8_10	Carlevaro 2019
Left ventricular assist device as a bridge to candidacy in end-stage chagas cardiomyopathy	Atik, F. A.; Cunha, C. R.; Chaves, R. B.; Ulhoa, M. B.; Barzilai, V. S.		2018	July	Arquivos Brasileiros de Cardiologia	111	1	112-114	623657481	http://dx.doi.org/10.5935/abc.20180095	Atik 2018
Living with chagas disease: Voices of the protagonists in rural communities	Nampula-Maheda, M.; Sosa-Rosas, M. P.; Jimenez-Lopez, E.	Background: Introduction. Chagas disease is considered a neglected tropical strongly linked to sociocultural and economic factors, its endemic at 21 countries in Americas, affecting people in rural communities, who may have cardiac complications if it is not diagnosed and treated in time. In Mexico, Chagas disease is a Public Health problem, and particularly in the Southeast region more cases hav…	2018	August	European Journal of Cardiovascular Nursing	17 (1 Supplement 1)		115-116	623640776	http://dx.doi.org/10.1177/14745151187877	Nampula-Maheda 2018
Lipoproteins from vertebrate host blood plasma are involved in Trypanosoma cruzi epimastigote agglutination and participate in interaction with the vector insect, Rhodnius prolixus	Moreira, C. J. C.; De Cicco, N. N. T.; Galdino, T. S.; Feder, D.; Gonzalez, M. S.; Miguel, R. B.; Coura, J. R.; Castro, H. C.; Azambuja, P.; Atella, G. C.; Ratcliffe, N. A.; Mello, C. B.	Chagas disease, infecting ca. 8 million people in Central and South America, is mediated by the protozoan parasite, Trypanosoma cruzi. The parasite is transmitted by the bite of blood sucking triatomine insects, such as Rhodnius prolixus, that had previously fed on parasite-infected vertebrate blood and voided their contaminated feces and urine into the wound. The stages of the parasite life cycl…	2018	Dec	Experimental Parasitology	195		24-33	30261188	https://dx.doi.org/10.1016/j.exppara.2018.09.017	Moreira 2018
Lipophorin and vitellogenin receptors in the regulation of oogenesis and follicular atresia in dipetalogaster maxima, a vector of Chagas' disease	Ramos, F. O.; Leyria, J.; Canavoso, L. E.	Vitellogenesis is a central event in the reproduction of the insects. It is regulated by nutritional and endocrine factors, including the juvenile hormone (JH). During vitellogenesis, vitellogenin (Vg) and lipophorin (Lp) are synthesized in the fat body, secreted into the hemolymph and further internalized by the oocytesthroughoutthe endocytic receptors RVg and RLp, respectively. However, under d…	2018		Biocell. Conference	42	Supplement 1		621687628		Ramos 2018
Lipoic acid metabolism in Trypanosoma cruzi as putative target for chemotherapy	Vacchina, P.; Lambruschi, D. A.; Uttaro, A. D.	Lipoic acid (LA) is a cofactor of relevant enzymatic complexes including the glycine cleave system and 2-ketoacid dehydrogenases. Intervention on LA de novo synthesis or salvage could have pleiotropic deleterious effect in cells, making both pathways attractive for chemotherapy. We show that Trypanosoma cruzi was susceptible to treatment with LA analogues. 8-Bromo-octanic acid (BrO) inhibited the…	2018	Mar	Experimental Parasitology	186		17-23	29409741	https://dx.doi.org/10.1016/j.exppara.2018.01.017	Vacchina 2018
Lipids From Trypanosoma cruzi amastigotes of RA and K98 strains generate a pro-inflammatory response via TLR2/6	Bott, E.; Carneiro, A. B.; Gimenez, G.; Lopez, M. G.; Lammel, E. M.; Atella, G. C.; Bozza, P. T.; Belaunzaran, M. L.	Lipids from microorganisms are ligands of Toll like receptors (TLRs) and modulate the innate immune response. Herein, we analyze in vitro the effect of total lipid extracts from Trypanosoma cruzi amastigotes of RA and K98 strains (with polar biological behavior) on the induction of the inflammatory response and the involvement of TLRs in this process. We demonstrated that total lipid extracts fro…	2018	2021-05-08	Frontiers in Cellular and Infection Microbiology	8 (MAY) (no pagination)	151		622098724	http://dx.doi.org/10.3389/fcimb.2018.00151	Bott 2018
The limpet transcription factors of Triatoma infestans regulate the response to fungal infection and modulate the expression pattern of defensin genes	Mannino, M. C.; Paixao, F. R. S.; Pedrini, N.	As part of the innate humoral response to microbial attack, insects activate the expression of antimicrobial peptides (AMP). Understanding the regulatory mechanisms of this response in the Chagas disease vector Triatoma infestans is important since biological control strategies against pyrethroid-resistant insect populations were recently addressed by using the entomopathogenic fungus Beauveria b…	2019	May	Insect Biochemistry & Molecular Biology	108		53-60	30922828	https://dx.doi.org/10.1016/j.ibmb.2019.03.010	Mannino 2019
Limited Foxp3<sup>+</sup> Regulatory T Cells Response During Acute Trypanosoma cruzi Infection Is Required to Allow the Emergence of Robust Parasite-Specific CD8<sup>+</sup> T Cell Immunity	Araujo Furlan, C. L.; Tosello Boari, J.; Rodriguez, C.; Canale, F. P.; Fiocca Vernengo, F.; Boccardo, S.; Beccaria, C. G.; Adoue, V.; Joffre, O.; Gruppi, A.; Montes, C. L.; Acosta Rodriguez, E. V.	While it is now acknowledged that CD4<sup>+</sup> T cells expressing CD25 and Foxp3 (Treg cells) regulate immune responses and, consequently, influence the pathogenesis of infectious diseases, the regulatory response mediated by Treg cells upon infection by Trypanosoma cruzi was still poorly characterized. In order to understand the role of Treg cells during infection by this protozoan parasite, …	2018		Frontiers in Immunology	9		2555	30455700	https://dx.doi.org/10.3389/fimmu.2018.02555	AraujoFurlan 2018
Limit of detection of PCR/RFLP analysis of cytochrome oxidase II for the identification of genetic groups of Trypanosoma cruzi and Trypanosoma rangeli in biological material from vertebrate hosts	Sa, A. R. N.; Kimoto, K. Y.; Steindel, M.; Grisard, E. C.; Gomes, M. L.	Mixed infections with Trypanosoma cruzi and Trypanosoma rangeli and their different genetic groups occur frequently in vertebrate hosts and are difficult to detect by serology. In the present study, we evaluated the limit of detection of polymerase chain reaction/restriction fragment length polymorphism (PCR/RFLP) analysis of cytochrome oxidase II (COII) for the identification of genetic groups o…	2018	Aug	Parasitology Research	117	8	2403-2410	29858942	https://dx.doi.org/10.1007/s00436-018-5928-1	Sa 2018
Level of autoantibodies against beta1-adrenoreceptor in patients with ventricular arrhythmias with DCM, ischemic heart disease and "idiopathic" heart rhythm disorders	Kostyukevich, M. V.; Zykov, K. A.; Mironova, N. A.; Shevelev, A. Y.; Vlasik, T. N.; Efremov, E. E.; Sharf, T. V.; Golitsyn, S. P.	Introduction: Elevated level of anti-b1-adrenoreceptor autoantibodies (ab1ARA) is widely described in patients with Chagas disease and dilated cardiomyopathy (DCM). There is evidence that ongoing myocardial inflammation and autoimmune mechanisms play an important role not only in patients with DCM, but also in patients with ischemic heart disease and arrhythmias without structural heart disease (…	2017	June	Europace	19 (Supplement 3)		iii219	618768052		Kostyukevich 2017
Leveraging the cruzain S3 subsite to increase affinity for reversible covalent inhibitors	Cianni, L.; Sartori, G.; Rosini, F.; De Vita, D.; Pires, G.; Lopes, B. R.; Leitao, A.; Burtoloso, A. C. B.; Montanari, C. A.	Cruzain is the major cysteine protease of Trypanosoma cruzi, the etiological agent of Chagas disease. Reversible covalent cruzain inhibitors can block the steps of cell differentiation in the parasite and kill the organism. To this end, the description of how inhibitors modified at the P2/P3 positions lead to analogs with greater cruzain affinity to the S2/S3 subsites is of fundamental importance…	2018	9	Bioorganic Chemistry	79		285-292	29783099	https://dx.doi.org/10.1016/j.bioorg.2018.04.006	Cianni 2018
LFA-1 Mediates Cytotoxicity and Tissue Migration of Specific CD8<sup>+</sup> T Cells after Heterologous Prime-Boost Vaccination against Trypanosoma cruzi Infection	Ferreira, C. P.; Cariste, L. M.; Santos Virgilio, F. D.; Moraschi, B. F.; Monteiro, C. B.; Vieira Machado, A. M.; Gazzinelli, R. T.; Bruna-Romero, O.; Menin Ruiz, P. L.; Ribeiro, D. A.; Lannes-Vieira, J.; Lopes, M. F.; Rodrigues, M. M.; de Vasconcelos, J. R. C.	Integrins mediate the lymphocyte migration into an infected tissue, and these cells are essential for controlling the multiplication of many intracellular parasites such as Trypanosoma cruzi, the causative agent of Chagas disease. Here, we explore LFA-1 and VLA-4 roles in the migration of specific CD8<sup>+</sup> T cells generated by heterologous prime-boost immunization during experimental infec…	2017		Frontiers in Immunology	8		1291	29081775	https://dx.doi.org/10.3389/fimmu.2017.01291	Ferreira 2017
Life Cycle, Feeding, and Defecation Patterns of Triatoma carrioni (Hemiptera: Reduviidae), Under Laboratory Conditions	Padilla, N. A.; Moncayo, A. L.; Keil, C. B.; Grijalva, M. J.; Villacis, A. G.	Chagas disease is caused by Trypanosoma cruzi (Kinetoplastida: Trypanosomatidae). It is transmitted to humans primarily through contaminated feces of blood-sucking vectors of the subfamily Triatominae, known in Ecuador as 'chinchorros'. Some Triatominae species can adapt to domiciliary and peridomiciliary environments where T. cruzi can be transmitted to humans. Triatoma carrioni (Larrousse 1926)…	2019	2016-04-01	Journal of medical entomology	56	3	617-624	30768666	https://dx.doi.org/10.1093/jme/tjz004	Padilla 2019
Retention, engagement, and adherence to pre-exposure prophylaxis for men who have sex with men and transgender women in PrEP Brasil: 48 week results of a demonstration study	Grinsztejn, B.; Hoagland, B.; Moreira, R. I.; Kallas, E. G.; Madruga, J. V.; Goulart, S.; Leite, I. C.; Freitas, L.; Martins, L. M. S.; Torres, T. S.; Vasconcelos, R.; De Boni, R. B.; Anderson, P. L.; Liu, A.; Luz, P. M.; Veloso, V. G.; Pr, E. P. Brasil Study Team	BACKGROUND: PrEP Brasil was a demonstration study to assess feasibility of daily oral tenofovir diphosphate disoproxil fumarate plus emtricitabine provided at no cost to men who have sex with men (MSM) and transgender women at high risk for HIV within the Brazilian public health system. We report week 48 pre-exposure prophylaxis (PrEP) retention, engagement, and adherence, trends in sexual behavi…	2018	3	The Lancet. HIV	5	3	e136-e145	29467098	https://dx.doi.org/10.1016/S2352-3018(18)30008-0	Grinsztejn 2018
Results of ACTG A5288: a strategy study in RLS for 3rd-line ART candidates	Grinsztejn, B.; Hughes, M. D.; Ritz, J.; Salata, R.; Mugyenyi, P.; Hogg, E.; Wieclaw, L.; Gross, R.; Godfrey, C.; Kumarasamy, N.; et al.,	Background: Individuals presenting for 3rd line ART are a challenge in resource limited settings (RLS) because of uncertain ARV susceptibility and limited data on virologic responses to remaining available ARV regimens. Methods: A5288 is an openâ€label strategy study in RLS in HIVâ€1 infected individuals presenting with confirmed plasma HIV RNA (VL) â‰¥ 1000 copies after > 24 weeks of proteaseâ…	2018		Topics in antiviral medicine	26		14sâ€	CN-01569193		Grinsztejn 2018
Response to Trypanosoma cruzi by Human Blood Cells Enriched with Dentritic Cells Is Controlled by Cyclooxygenase-2 Pathway	Lonien, S. C. H.; Malvezi, A. D.; Suzukawa, H. T.; Yamauchi, L. M.; Yamada-Ogatta, S. F.; Rizzo, L. V.; Bordignon, J.; Pinge-Filho, P.	Chagas disease (Cd) or American human trypanosomiasis is caused by Trypanosoma cruzi and affects ~7 million people, mostly in Latin America. The infective trypomastigote forms of the parasite can invade several human blood cell populations, including monocytes and dendritic cells (DC). Although these cells display a wide functional diversity, their interactions with T. cruzi via cyclooxygenase (C…	2017		Frontiers in Microbiology	8		2020	29118740	https://dx.doi.org/10.3389/fmicb.2017.02020	Lonien 2017
Response to `letter to the editor: 'Strategies to enhance access to diagnosis and treatment for Chagas disease patients in Latin America''	Alonso-Padilla, J.; Cortes-Serra, N.; Pinazo, M. J.; Bottazzi, M. E.; Abril, M.; Barreira, F.; Sosa-Estani, S.; Hotez, P. J.; Gascon, J.		2019	2006-08-01	Expert Review of Antiinfective Therapy			2021-03-01	31361163	https://dx.doi.org/10.1080/14787210.2019.1649139	Alonso-Padilla 2019
Refractory electrical storm in chagas cardiomyopathy: Is heart transplant the last option?	Pinheiro, I. C.; Rocha, J. R. F.; Caires, M. C.; Villela, P. B.; Siqueira, L. R.; Alencar, A. T.; Sampaio, P. A.; Sousa, A. S.; Ferreira, R. M.	Introduction: In Brazil, Chagas cardiomyopathy (CC) is a common cause of arrhythmic sudden death. Primary and secondary preventive measures include implantable cardioverter defibrillators (ICD) and ablation, although refractory cases could still occur. Case Report: A 49 year old male patient with CC received an ICD in 2007, due to recurrent symptomatic monomorphic ventricular tachycardia (VT). In…	2018		Cardiology (Switzerland)	140 (Supplement 1)		328	623414844	http://dx.doi.org/10.1159/000491714	Pinheiro 2018
Reduced functional capacity in patients with Chagas disease: a systematic review with meta-analysis	Costa, H. S.; Lima, M. M. O.; Costa, Fsmd; Chaves, A. T.; Nunes, M. C. P.; Figueiredo, P. H. S.; Rocha, Modc	Reduced peak oxygen uptake (VO2peak) is a common clinical finding in progressive Chagas disease. However, the disease stage in which functional impairment is detectable remains uncertain. The present study compared functional capacity between healthy controls and patients with different clinical forms of Chagas disease. A systematic review and meta-analysis (PROSPERO database CRD42017058353) was …	2018	Jul-Aug	Rev Soc Bras Med Trop	51	4	421-426	30133623	https://dx.doi.org/10.1590/0037-8682-0158-2018	Costa 2018
Redox Regulation of Hexokinases	Heneberg, P.	SIGNIFICANCE: Hexokinases are key enzymes that are responsible for the first reaction of glycolysis, but they also moonlight other cellular processes, including mitochondrial redox signaling regulation. Modulation of hexokinase activity and spatiotemporal location by reactive oxygen and nitrogen species as well as other gasotransmitters serves as the basis for a unique, underexplored method of ti…	2019	2020-01-01	Antioxidants & Redox Signaling	30	3	415-442	29742915	https://dx.doi.org/10.1089/ars.2017.7255	Heneberg 2019
[Recommendations for the screening for infectious diseases, mental health, and female genital mutilation in immigrant patients seen in Primary Care]	Sequeira-Aymar, E.; diLollo, X.; Osorio-Lopez, Y.; Goncalves, A. Q.; Subira, C.; Requena-Mendez, A.	Immigrant health status may be improved if certain health conditions are identified early through the implementation of a screening program. This document presents the recommendations resulting from the Screening in immigrant population project (CRIBMI) aimed at implementing a screening program for infectious diseases (HIV, HBV, HCV, tuberculosis, strongyloidiasis, schistosomiasis and Chagas dise…	2019	2024-04-01	Atencion Primaria	24		24	31029458	https://dx.doi.org/10.1016/j.aprim.2019.02.005	Sequeira-Aymar 2019
Recommendations for Multimodality Cardiac Imaging in Patients with Chagas Disease: A Report from the American Society of Echocardiography in Collaboration With the InterAmerican Association of Echocardiography (ECOSIAC) and the Cardiovascular Imaging Department of the Brazilian Society of Cardiology (DIC-SBC)	Acquatella, H.; Asch, F. M.; Barbosa, M. M.; Barros, M.; Bern, C.; Cavalcante, J. L.; Echeverria Correa, L. E.; Lima, J.; Marcus, R.; Marin-Neto, J. A.; Migliore, R.; Milei, J.; Morillo, C. A.; Nunes, M. C. P.; Campos Vieira, M. L.; Viotti, R.		2018	January	Journal of the american society of echocardiography	31	1	2025-03-01	620079083	http://dx.doi.org/10.1016/j.echo.2017.10.019	Acquatella 2018
RecomendaÃ§Ãµes para anaÃ¡lise multimodalidade de imagem cardÃ­aca em pacientes con Doenla de Chagas: relatÃ³rio da American Society of Echocardiography, com colaboraÃ§Ã£o da AsociaciÃ³n de EcocardiografÃ­a e Imagem Cardiovascular de la Sociedade Interamericana de CardiologÃ­a (ECOSIAC) e do Departamento de Imagem Cardiovascular da Sociedade Brasileira de Cardiologia (DIC-SBC)	Oliveira, Marina Torres de; Batista, Daniel Valente; Chaves, Daniel Moretti; Reis, PatrÃ­cia Feitosa Frota dos; Maia, ClÃ¡udio Humberto GonÃ§alves; Dias Neto, Vitor; Saito, Victor Tadami; Linhares Filho, Jaime Paula Pessoa; Couto, Tauin Raoni do; Vieira, Marcelo Luiz Campos; Lima, MÃ¡rcio Silva Miguel; Frota, Daniela do Carmo Rassi; Hotta, Viviane Tiemi		2018	2018/10	ABC., imagem cardiovasc	31	4				Oliveira 2018
The recombinase Rad51 plays a key role in events of genetic exchange in Trypanosoma cruzi	Alves, C. L.; Repoles, B. M.; da Silva, M. S.; Mendes, I. C.; Marin, P. A.; Aguiar, P. H. N.; Santos, S. D. S.; Franco, G. R.; Macedo, A. M.; Pena, S. D. J.; Andrade, L. O.; Guarneri, A. A.; Tahara, E. B.; Elias, M. C.; Machado, C. R.	Detection of genetic exchange has been a limiting factor to deepen the knowledge on the mechanisms by which Trypanosoma cruzi is able to generate progeny and genetic diversity. Here we show that incorporation of halogenated thymidine analogues, followed by immunostaining, is a reliable method not only to detect T. cruzi fused-cell hybrids, but also to quantify their percentage in populations of t…	2018	2006-09-01	Scientific reports	8	1	13335	30190603	https://dx.doi.org/10.1038/s41598-018-31541-z	Alves 2018
Recombinant Enolase of Trypanosoma cruzi as a Novel Vaccine Candidate against Chagas Disease in a Mouse Model of Acute Infection	Arce-Fonseca, M.; Gonzalez-Vazquez, M. C.; Rodriguez-Morales, O.; Graullera-Rivera, V.; Aranda-Fraustro, A.; Reyes, P. A.; Carabarin-Lima, A.; Rosales-Encina, J. L.	Trypanosoma cruzi is the protozoan parasite that causes Chagas disease, which is considered by the World Health Organization to be a neglected tropical disease. Two drugs exist for the treatment of Chagas disease, nifurtimox and benznidazole; they are only effective in the acute phase, and a vaccine is currently not available. In this study, we used the recombinant enolase from T. cruzi H8 strain…	2018		Journal of Immunological Research	2018		8964085	29854848	https://dx.doi.org/10.1155/2018/8964085	Arce-Fonseca 2018
Recognition for Chagas disease	Burki, T.		2019	Jul	The Lancet Infectious Diseases	19	7	699	31250822	https://dx.doi.org/10.1016/S1473-3099(19)30319-6	Burki 2019
Recent Theoretical Studies Concerning Important Tropical Infections	Monteiro, A. F. M.; de Oliveira Viana, J.; Junior, F. J. B.; Ishiki, H. M.; Tchouboun, E. N.; de Araujo, R. S.; Scotti, M. T.; Scotti, L.	Neglected tropical diseases (NTDs) form a group of diseases that are strongly associated with poverty, flourish in impoverished environments, and thrive best in tropical areas, where they tend to present overlap. They comprise several diseases, and the symptoms vary dramatically from disease to disease, often causing from extreme pain, and untold misery that anchors populations to poverty, perman…	2019		Current medicinal chemistry.	11			628738514	http://dx.doi.org/10.2174/0929867326666190711121418	Monteiro 2019
Reactivation of chagas disease after cardiac transplantation	Schtruk, L. E.; Sales, A. F.; Sampaio, J. M.; Sa, A. K.; Guimaraes, T. F.; Neres, L.; Colafranceschi, A. S.	Purpose: Chagas Disease (CD) is endemic in some regions of the Americas, which according to WHO data, there are 6 to 7 million people infected with Trypanosoma cruzi. Heart transplantation (HTX) is a therapeutic option in terminal heart failure cases associated with this disease. CD is characterized by an acute parasitemic fase, usually symptomatic (fever, hepatosplenomegaly, "chagoma", myocardit…	2017	April	Journal of Heart and Lung Transplantation	36 (4 Supplement 1)		S89	618689741		Schtruk 2017
Rational modification of Mannich base-type derivatives as novel antichagasic compounds: Synthesis, in vitro and in vivo evaluation	Paucar, R.; Martin-Escolano, R.; Moreno-Viguri, E.; Azqueta, A.; Cirauqui, N.; Marin, C.; Sanchez-Moreno, M.; Perez-Silanes, S.	The current chemotherapy against Chagas disease is inadequate and insufficient. A series of ten Mannich base-type derivatives have been synthesized to evaluate their in vitro antichagasic activity. After a preliminary screening, compounds 7 and 9 were subjected to in vivo assays in a murine model. Both compounds caused a substantial decrease in parasitemia in the chronic phase, which was an even …	2019	2001-09-01	Bioorganic & Medicinal Chemistry	27	17	3902-3917	31345745	https://dx.doi.org/10.1016/j.bmc.2019.07.029	Paucar 2019
A rare case of giardia lamblia-associated myocarditis	Zaremba, T.; Tayal, B.; Sogaard, P.	Objectives: A 42-year-old male was admitted to our emergency department with a sudden onset of severe chest pain and dyspnoea. The patient was also having nausea, vomiting, and abdominal discomfort but no diarrhoea for the past six days before the admission. He had a history of type-II diabetes, hypercholesterolaemia and tobacco use. The EKG showed negative T-waves in leads I, II, aVL, and V4-V6.…	2017	May	European Heart Journal Cardiovascular Imaging	18 (Supplement 2)		ii124	625723536	http://dx.doi.org/10.1093/ehjci/jex124	Zaremba 2017
Rapid, Selection-Free, High-Efficiency Genome Editing in Protozoan Parasites Using CRISPR-Cas9 Ribonucleoproteins	Soares Medeiros, L. C.; South, L.; Peng, D.; Bustamante, J. M.; Wang, W.; Bunkofske, M.; Perumal, N.; Sanchez-Valdez, F.; Tarleton, R. L.	Trypanosomatids (order Kinetoplastida), including the human pathogens Trypanosoma cruzi (agent of Chagas disease), Trypanosoma brucei, (African sleeping sickness), and Leishmania (leishmaniasis), affect millions of people and animals globally. T. cruzi is considered one of the least studied and most poorly understood tropical disease-causing parasites, in part because of the relative lack of faci…	2017	11 07	mBio	8	6	7	29114029	https://dx.doi.org/10.1128/mBio.01788-17	SoaresMedeiros 2017
A rapid diagnostic test for human Visceral Leishmaniasis using novel Leishmania antigens in a Laser Direct-Write Lateral Flow Device	Humbert, M. V.; Costa, L. E.; Katis, I.; Fonseca Ramos, F.; Sanchez Machado, A.; Sones, C.; Ferraz Coelho, E. A.; Christodoulides, M.	<b>ABSTRACT</b> Visceral Leishmaniasis (VL) causes high morbidity and mortality in low-to-middle-income countries worldwide. In this study, we used Laser Direct-Write (LDW) technology to develop a new Lateral Flow Device (LFD) with double-channel geometry on a low-cost paper platform as a rapid and accurate serodiagnostic assay for human VL. This Duplex VL-LFD was based on a laser-patterned micro…	2019		Emerging Microbes & Infections	8	1	1178-1185	31381478	https://dx.doi.org/10.1080/22221751.2019.1635430	Humbert 2019
Rapid detection of human blood in triatomines (kissing bugs) utilizing a lateral flow immunochromatographic assay - A pilot study	Beatty, N. L.; Behrens-Bradley, N.; Love, M.; McCants, F.; Smith, S.; Schmidt, J. O.; Hamer, S. A.; Dorn, P. L.; Ahmad, N.; Klotz, S. A.	OBJECTIVES: We tested a rapid and specific immunochromatographic assay (that detects human blood in forensic samples) to determine if human blood was present in triatomines and their fecal excreta._x000D_METHODS: We fed Triatoma rubida human blood (positive control) or mouse blood (negative control) and performed the assay on the abdominal contents and fecal excreta. Triatomine field specimens co…	2019		Mem Inst Oswaldo Cruz	114		e190047	31166422	https://dx.doi.org/10.1590/0074-02760190047	Beatty 2019
Rac1/WAVE2 and Cdc42/N-WASP Participation in Actin-Dependent Host Cell Invasion by Extracellular Amastigotes of Trypanosoma cruzi	Bonfim-Melo, A.; Ferreira, E. R.; Mortara, R. A.	This study evaluated the participation of host cell Rho-family GTPases and their effector proteins in the actin-dependent invasion by Trypanosoma cruzi extracellular amastigotes (EAs). We observed that all proteins were recruited and colocalized with actin at EA invasion sites in live or fixed cells. EA internalization was inhibited in cells depleted in Rac1, N-WASP, and WAVE2. Time-lapse experim…	2018		Frontiers in Microbiology	9		360	29541069	https://dx.doi.org/10.3389/fmicb.2018.00360	Bonfim-Melo 2018
Quinoxaline derivatives as potential antitrypanosomal and antileishmanial agents	Cogo, J.; Cantizani, J.; Cotillo, I.; Sangi, D. P.; Correa, A. G.; Ueda-Nakamura, T.; Filho, B. P. D.; Martin, J. J.; Nakamura, C. V.	Continuous efforts have been made to discover new drugs for the treatment of Chagas' disease, human African trypanosomiasis, and leishmaniasis. We have previously reported the synthesis and antileishmanial and antitrypanosomal (Y strain) properties of 2,3-disubstituted quinoxalines. Considering their promising antiparasitic potential, the present study was conducted to expand our search and take …	2018	2021-08-07	Bioorganic and Medicinal Chemistry	26	14	4065-4072	2000895961	http://dx.doi.org/10.1016/j.bmc.2018.06.033	Cogo 2018
Quantitative Structure-Activity Relationships for Structurally Diverse Chemotypes Having Anti-Trypanosoma cruzi Activity	de Souza, A. S.; Ferreira, L. L. G.; de Oliveira, A. S.; Andricopulo, A. D.	Small-molecule compounds that have promising activity against macromolecular targets from Trypanosoma cruzi occasionally fail when tested in whole-cell phenotypic assays. This outcome can be attributed to many factors, including inadequate physicochemical and pharmacokinetic properties. Unsuitable physicochemical profiles usually result in molecules with a poor ability to cross cell membranes. Qu…	2019	2008-06-01	International Journal of Molecular Sciences	20	11	8	31181717	https://dx.doi.org/10.3390/ijms20112801	deSouza 2019
Quantitative phosphoproteome and proteome analyses emphasize the influence of phosphorylation events during the nutritional stress of Trypanosoma cruzi: the initial moments of in vitro metacyclogenesis	Lucena, A. C. R.; Amorim, J. C.; de Paula Lima, C. V.; Batista, M.; Krieger, M. A.; de Godoy, L. M. F.; Marchini, F. K.	Phosphorylation is an important event in cell signaling that is modulated by kinases and phosphatases. In Trypanosoma cruzi, the etiological agent of Chagas disease, approximately 2% of the protein-coding genes encode for protein kinases. This parasite has a heteroxenic life cycle with four different development stages. In the midgut of invertebrate vector, epimastigotes differentiate into metacy…	2019	1931-07-01	Cell Stress & Chaperones	31		31	31368045	https://dx.doi.org/10.1007/s12192-019-01018-7	Lucena 2019
Protection of the house against Chagas disease, dengue, leishmaniasis, and lymphatic filariasis: a systematic review	Horstick, O.; Runge-Ranzinger, S.	In light of the recent Zika virus outbreak, vector control has received renewed interest. However, which interventions are efficacious and community effective and how to best deliver them remains unclear. Following PRISMA guidelines, we did a systematic review to assess evidence for applied vector control interventions providing protection against Chagas disease, dengue, leishmaniasis, and lympha…	2018	May	The Lancet Infectious Diseases	18	5	e147-e158	618944786	http://dx.doi.org/10.1016/S1473-3099%2817%2930422-X	Horstick 2018
The proteasome as a target:How not tidying up can have toxic consequences for parasitic protozoa	Winzeler, E. A.; Ottilie, S.		2019		Proceedings of the National Academy of Sciences of the United States of America	116	21	10198-10200	2002007911	http://dx.doi.org/10.1073/pnas.1904694116	Winzeler 2019
Prostaglandin F2alpha synthase in Trypanosoma cruzi plays critical roles in oxidative stress and susceptibility to benznidazole	Garcia-Huertas, P.; Mejia-Jaramillo, A. M.; Machado, C. R.; Guimaraes, A. C.; Triana-Chavez, O.	Nifurtimox (Nfx) and benznidazole (Bz) are the current drugs used for the treatment of Chagas disease. The mechanisms of action and resistance to these drugs in this parasite are poorly known. Prostaglandin F2alpha synthase or old yellow enzyme (OYE), an NAD(P)H flavin oxidoreductase, has been involved in the activation pathway of other trypanocidal drugs such as Nfx; however, its role in the mec…	2017	Sep	Royal Society Open Science	4	9	170773	28989779	https://dx.doi.org/10.1098/rsos.170773	Garcia-Huertas 2017
Prospective Evaluation of HIV Patients Using Non-invasive Methods for Estimation of Liver Fibrosis and Steatosis	Oswaldo Cruz, Foundation		2020	May					NCT02542020		OswaldoCruz 2020
Prospecting for cytotoxic and antiprotozoal 4-aryl-4H-chromenes and 10-aryldihydropyrano[2,3-f]chromenes	Martin, E. F.; Mbaveng, A. T.; de Moraes, M. H.; Kuete, V.; Biavatti, M. W.; Steindel, M.; Efferth, T.; Sandjo, L. P.	Different studies reported that genetic predisposition or metabolic dysfunction are the risk factors for cancer. Infectious parasitic diseases were listed among factors that predispose to cancer. Because of the resemblance between the life cycle of cancer cells and some parasites, this study aimed to prepare pyran derivatives with cytotoxic and antiprotozoal potencies. Therefore, 7 chromenes, 10 …	2018	October	Archiv der Pharmazie	351 (10) (no pagination)	1800100		623735984	http://dx.doi.org/10.1002/ardp.201800100	Martin 2018
A prophylactic alpha-Gal-based glycovaccine effectively protects against murine acute Chagas disease	Portillo, S.; Zepeda, B. G.; Iniguez, E.; Olivas, J. J.; Karimi, N. H.; Moreira, O. C.; Marques, A. F.; Michael, K.; Maldonado, R. A.; Almeida, I. C.	Chagas disease (ChD), caused by the hemoflagellate parasite Trypanosoma cruzi, affects six to seven million people in Latin America. Lately, it has become an emerging public health concern in nonendemic regions such as North America and Europe. There is no prophylactic or therapeutic vaccine as yet, and current chemotherapy is rather toxic and has limited efficacy in the chronic phase of the dise…	2019		Npj Vaccines	4		13	30911415	https://dx.doi.org/10.1038/s41541-019-0107-7	Portillo 2019
Synthesis, anti-parasitic activity and QSAR study of a new library of polysubstituted tetrahydronaphtho[1,2-b]azepines	Yepes, A. F.; Bahsas, A.; Escobar, P.; Cobo, J.; Palma, A.; Garro Martinez, J. C.; Enriz, R.	A new series of twenty two 2-exo-aryl(heteroaryl)-1,4-epoxytetrahydronaphtho[1,2-b]azepines 8-10 and eighteen cis-2-aryl(heteroaryl)-4-hydroxytetrahydronaphtho[1,2-b]azepines 11-13 were synthesized, and most of them were tested for their ability to inhibit the in vitro growth of the extracellular forms of Trypanosoma cruzi and Leishmania infantum parasites. Cell toxicity was also determined on Ve…	2018	2021-10-01	Medicinal Chemistry Research	27	10	2239-2264	623536617	http://dx.doi.org/10.1007/s00044-018-2232-7	Yepes 2018
The Synthesis of Waltherione F and Its Analogues with Modifications at the 2- and 3-Positions as Potential Antitrypanosomal Agents	Zdorichenko, V.; Paumier, R.; Whitmarsh-Everiss, T.; Roe, M.; Cox, B.	Chagas disease also know as American Trypanosomiasis (AT) is a tropical parasitic disease endemic in South America, is caused by Trypanosoma cruzi, which is transmitted by the blood-sucking insect vectors called triatomine bugs. Quinoline alkaloids from the root extract of Waltheria indica are known to possess antitrypanosomal activity. Waltherione F, one of those alkaloids, was synthesised in 5 …	2019	2024-01-01	Chemistry-A European Journal	25	5	1286-1292	30398681	https://dx.doi.org/10.1002/chem.201804061	Zdorichenko 2019
Synthesis of the hexasaccharide from Trypanosoma cruzi mucins with the Galp(1->2)Galf unit constructed with a superarmed thiogalactopyranosyl donor	Kashiwagi, G. A.; Cori, C. R.; de Lederkremer, R. M.; Gallo-Rodriguez, C.	Hexasaccharide beta-D-Galp-(1->2)-[beta-D-Galp-(1->3)]-beta-D-Galp-(1->6)-[beta-D-Galp-(1->2)-beta-D-Galf-(1->4)]-D-GlcNAc (1) was found O-linked in mucins of Trypanosoma cruzi epimastigotes and metacyclic trypomatigotes. Studies on the biological pathways and functionalities of the mucin oligosaccharides are prompted in order to understand the interactions of these molecules with the insect host…	2019	2025-06-01	Carbohydrate Research	482		107734	31271957	https://dx.doi.org/10.1016/j.carres.2019.06.013	Kashiwagi 2019
Synthesis of lupeol derivatives and their antileishmanial and antitrypanosomal activities	Machado, V. R.; Sandjo, L. P.; Pinheiro, G. L.; Moraes, M. H.; Steindel, M.; Pizzolatti, M. G.; Biavatti, M. W.	The natural product lupeol 1 was isolated from aerial parts of Vernonia scorpioides with satisfactory yield, which made it viable to be used as starting material in semisynthetic approach. Ten lupeol derivatives 2-11 were prepared by classical procedures. Including, five new esters derivatives 7-11, which were obtained by structural modifications in the isopropylidene fragment. All semisynthetic …	2018	2021-02-01	Natural Product Research	32	3	275-281	617411522	http://dx.doi.org/10.1080/14786419.2017.1353982	Machado 2018
Synthesis and SAR of new isoxazole-triazole bis-heterocyclic compounds as analogues of natural lignans with antiparasitic activity	Zimmermann, L. A.; de Moraes, M. H.; da Rosa, R.; de Melo, E. B.; Paula, F. R.; Schenkel, E. P.; Steindel, M.; Bernardes, L. S. C.	Despite the impressive scientific and technological advances of recent decades, no effective treatment is currently available for Chagas disease. Our research group has been studying the design and synthesis of analogues of natural lignans aiming to identify compounds with antiparasitic activity. This article reports the synthesis of 42 novel bis-heterocyclic derivatives and the structure-activit…	2018	2021-09-15	Bioorganic and Medicinal Chemistry	26	17	4850-4862	2001067807	http://dx.doi.org/10.1016/j.bmc.2018.08.025	Zimmermann 2018
The synthesis and kinetic evaluation of aryl alpha-aminophosphonates as novel inhibitors of T. cruzi trans-sialidase	Chen, Z.; Marce, P.; Resende, R.; Alzari, P. M.; Frasch, A. C.; van den Elsen, J. M. H.; Crennell, S. J.; Watts, A. G.	The trans-sialidase protein expressed by Trypanosoma cruzi is an important enzyme in the life cycle of this human pathogenic parasite and is considered a promising target for the development of new drug treatments against Chagas' disease. Here we describe alpha-amino phosphonates as a novel class of inhibitor of T. cruzi trans-sialidase. Molecular modelling studies were initially used to predict …	2018	2005-10-01	European Journal of Medicinal Chemistry	158		25-33	30199703	https://dx.doi.org/10.1016/j.ejmech.2018.08.089	Chen 2018
Proof of Concept for a Portable Platform for Molecular Diagnosis of Tropical Diseases: On-Chip Ready-to-Use Real-Time Quantitative PCR for Detection of Trypanosoma cruzi or Plasmodium spp	Rampazzo, R. C. P.; Graziani, A. C.; Leite, K. K.; Surdi, J. A.; Biondo, C. A.; Costa, M. L. N.; Jacomasso, T.; Cereda, M.; De Fazio, M.; Bianchessi, M. A.; Moreira, O. C.; Britto, C.; Costa, J. D. N.; Goes, V. M.; da Silva, A. J.; Krieger, M. A.; Costa, A. D. T.	Although molecular diagnostics is well established in clinical laboratories, its full potential has not been extended to field settings. Typically, diagnostic real-time quantitative PCR (qPCR) reagents require temperature-controlled transportation and storage. Furthermore, thermocyclers are bulky and fragile, requiring good infrastructure for optimal operation. These major hurdles strongly limit …	2019	2004-06-01	Journal of Molecular Diagnostics	4		4	31173930	https://dx.doi.org/10.1016/j.jmoldx.2019.04.008	Rampazzo 2019
Prolonged dipyridamole administration reduces myocardial perfusion defects in experimental chronic Chagas cardiomyopathy	Tanaka, D. M.; de Oliveira, L. F. L.; Marin-Neto, J. A.; Romano, M. M. D.; de Carvalho, E. E. V.; de Barros Filho, A. C. L.; Ribeiro, F. F. F.; Cabeza, J. M.; Lopes, C. D.; Fabricio, C. G.; Kesper, N.; Moreira, H. T.; Wichert-Ana, L.; Schmidt, A.; Higuchi, M. L.; Cunha-Neto, E.; Simoes, M. V.	BACKGROUND: Myocardial perfusion defects (MPD) due to coronary microvascular dysfunction is frequent in chronic Chagas cardiomyopathy (CCC) and may be involved with development of myocardial damage. We investigated whether MPD precedes left ventricular systolic dysfunction and tested the hypothesis that prolonged use of dipyridamole (DIPY) could reduce MPD in an experimental model of CCC in hamst…	2018	2001-02-01	Journal of Nuclear Cardiology	1		1	29392628	https://dx.doi.org/10.1007/s12350-018-1198-7	Tanaka 2018
Prognostic value of real-time three-dimensional echocardiography compared to two-dimensional echocardiography in patients with systolic heart failure	Mancuso, F. J. N.; Moises, V. A.; Almeida, D. R.; Poyares, D.; Storti, L. J.; Brito, F. S.; Tufik, S.; de Paola, A. A. V.; Carvalho, A. C. C.; Campos, O.	Heart failure (HF) is associated with morbidity and mortality. Real-time three-dimensional echocardiography (RT3DE) may offer additional prognostic data in patients with HF. The study aimed to evaluate the prognostic value of real-time three-dimensional echocardiography (RT3DE). This is a prospective study that included 89 patients with HF and left ventricular ejection fraction (LVEF) < 0.50 who …	2018	2021-04-01	International Journal of Cardiovascular Imaging	34	4	553-560	619137025	http://dx.doi.org/10.1007/s10554-017-1266-0	Mancuso 2018
The prognostic power of cardiopulmonary exercise testing in patients with Chagas heart disease	Pedro Schwartzmann, P.; Moreira, H. T.; Mayumi, D.; Crescencio, J. C.; Oliveira, L. F. L.; Carvalho, E. E. V.; Arena, R.; Schmidt, A.; Gallo-Junior, L. F. L.; Simoes, M. V.	Introduction: Cardiopulmonary exercise testing (CPX) has demonstrated a strong prognostic value in patients with ischemic and non-ischemic heart failure (HF). Increased minute ventilation/carbon dioxide production (VE/VCO2) slope, presence of exercise oscillatory ventilation (EOV), and low peak oxygen consumption (VO2) are markers of adverse outcomes in patients with HF. However, the prognostic r…	2018	May	European journal of heart failure	20 (Supplement 1)		424-425	622651162	http://dx.doi.org/10.1002/ejhf.1197	PedroSchwartzmann 2018
Prevalence and trends in transfusion-transmissible infections among blood donors in Brazil from 2010 to 2016	Pessoni, L. L.; Aquino, E. C.; Alcantara, K. C.	BACKGROUND: Assessing trends in the rate of transfusion-transmissible infections (TTIs) in blood donors is critical to the monitoring of the blood supply safety and the donor screening effectiveness. The objective of this study was to conduct a trend analysis of TTIs and associated demographic factors of donors at a public blood bank in the central Brazil._x000D_METHODS: A retrospective analysis …	2019	2004-07-01	Hematology Transfusion & Cell Therapy	4		4	31409582	https://dx.doi.org/10.1016/j.htct.2019.03.009	Pessoni 2019
Prevalence and risk factors of CHAGAS disease among agricultural workers in North Western Nicaragua	McKenna, M. L.; Gunter, S.; Nolan, M.; Fischer, R. S.; Chavarria, D.; Palma, L.; Murray, K. O.	Chagas disease is an infection caused by the parasite, Trypanosoma cruzi, and is primarily transmitted to humans by Triatomine insects. This disease is endemic throughout the Americas, and it is estimated that 6-8 million persons are infected. Thirty percent of those infected are likely to develop Chronic Chagas Cardiomyopathy (CCC), a rapidly, progressive form of cardiomyopathy. CCC is the most …	2018	October	American Journal of Tropical Medicine and Hygiene	99 (4 Supplement)		624-625	627541821		McKenna 2018
Prevalence and profile of chagas disease in the state of Rio de Janeiro in the last 5 years	Macedo, T. L. S.; Santos, C. T.; Anjos, I. L. P. B.; Rodrigues, D. M. F.; Rebello, D. M.; Araujo, I. I. O.; Rosa, R. B. R.; Gama, T. F. J.; Rocha, M. A.; Vilagra, S. M. B. W.; Vilagra, M. M.; Aragao, A. A. B.; Aragao, I. P. B.	Introduction: Chagas disease is a tropical disease, caused by the protozoan Trypanosoma cruzi. These protozoa have a wide geographical distribution and the incidence is often related to the economic and social level of the region. Contamination can occur in a variety of ways and clinical manifestation can be acute or chronic with severe digestive tract disease, chronic heart disease with heart fa…	2018	June	European Journal of Preventive Cardiology	25 (2 Supplement 1)		S104	623020724		Macedo 2018
Prevalence and Profile of Chagas Disease In The State of Rio de Janeiro In The Last 5 Years	Macedo, T. L. S.; Santos, C. T.; Anjos, I. L. P. B.; Rebello, D. M.; Belo, G. V.; Rosa, R. B. D. R.; Rocha, M. A. D.; Marcolla, V. D. F.; Santos, R. A. D.; Rodrigues, D. M. F.; Vilagra, S. M. B. W.; Vilagra, M. M.; Rabello, E.; Aragao, A. A. B.; Aragao, I. P. B.	Introduction: Chagas disease is a tropical disease, caused by the protozoan Trypanosoma cruzi. These protozoa have a wide geographical distribution and the incidence is often related to the economic and social level of the region. Contamination can occur in a variety of ways and clinical manifestation can be acute or chronic with severe digestive tract disease, chronic heart disease with heart fa…	2018	December	Global Heart	13 (4)		401-402	2001223862	http://dx.doi.org/10.1016/j.gheart.2018.09.094	Macedo 2018
Presence of microsatellite instability in esophageal squamous cell carcinoma associated with chagasic megaesophagus	Campanella, N. C.; Lacerda, C. F.; Berardinelli, G. N.; Abrahao-Machado, L. F.; Cruvinel-Carloni, A.; De Oliveira, A. T. T.; Scapulatempo-Neto, C.; Crema, E.; Adad, S. J.; Rodrigues, M. A. M.; Henry, Maca; Guimaraes, D. P.; Reis, R. M.	AIM: The molecular pathogenesis of esophageal squamous cell carcinoma (ESCC) has been increasingly studied, but there is no report on the role of MSI in ESCC development associated with chagasic megaesophagus (CM).Results/methodology: In four ESCC/CM (4/19) we found microsatellite instability (MSI) alterations (21.1%), being three MSI-L (15.8%) and one MSI-H (5.3%). Four out of 35 ESCC cases show…	2018	6	Biomarkers in Medicine	12	6	573-582	29873509	https://dx.doi.org/10.2217/bmm-2017-0329	Campanella 2018
Preparation and Characterization of Poloxamer 407 Solid Dispersions as an Alternative Strategy to Improve Benznidazole Bioperformance	Simonazzi, A.; Davies, C.; Cid, A. G.; Gonzo, E.; Parada, L.; Bermudez, J. M.	Benznidazole (BZL), the first line drug for Chagas disease treatment, presents a low solubility, limiting the possibilities for its formulation. In this work, solid dispersions' (SDs) technology was exploited to increase BZL kinetic solubility and dissolution rate, seeking for an improvement in its bioperformance. A physical mixture (PM) and an SD using Poloxamer 407 as carrier were prepared and …	2018	11	Journal of Pharmaceutical Sciences	107	11	2829-2836	30005984	https://dx.doi.org/10.1016/j.xphs.2018.06.027	Simonazzi 2018
Pregnancy and tropical parasitic infections. [Turkish]	Karasahin, K. E.; Ozturk, M.; Alanbay, I.; Firatligil, F. B.	Parasitic infections influence ten of millions of pregnant worldwide. While the rate varies according to the regions in our country they are reported to be around 20%. In recent years in our country, this rate is increasing by the migrants who escaped from the chaos in the Middle East countries. Parasitic infections show their effect at maternal, fetal and placental levels. Ancylostoma duodenale,…	2017		Zeynep Kamil Tip Bulteni	48	4	190-192	622269009	http://dx.doi.org/10.16948/zktipb.285199	Karasahin 2017
Predictors of mortality and heart transplantation in patients with Chagas' cardiomyopathy and ventricular tachycardia treated with implantable cardioverter-defibrillators: commentary	Martinelli Filho, M.		2019		Europace : European pacing, arrhythmias, and cardiac electrophysiology : journal of the working groups on cardiac pacing, arrhythmias, and cardiac cellular electrophysiology of the European Society of Cardiology.	21			627020435	http://dx.doi.org/10.1093/europace/euz045	MartinelliFilho 2019
Predictors and prognostic impact of leptomeningeal collateral flow in patients with proximal middle cerebral artery occlusion in Brazil	Escobar, D.; Martins, R. K.; Dias, F. A.; Alessio Alves, F.; De Castro Afonso, L. H.; Zanon Zontin, M. C.; Cougo-Pinto, P.; Nakiri, G.; Barreira, C. M.; Camilo, M. R.; Monsignore, L. M.; Cabette, S. R. F.; Giansante Abud, D.; Pontes-Neto, O. M.	Background and Aims: Good leptomeningeal collateral flow has been associated with better outcomes in patients with proximal occlusions of the anterior circulation. Few studies have assessed the predictors of good leptomeningeal collateral flow and its impact on clinical outcome in developing countries. We aim to evaluate predictors and prognostic impact of leptomeningeal collateral flow among pat…	2018	May	European Stroke Journal	3 (1 Supplement 1)		242	622487869	http://dx.doi.org/10.1177/2396987318770127	Escobar 2018
Preclinical candidate for the treatment of visceral leishmaniasis that acts through proteasome inhibition	Wyllie, S.; Brand, S.; Thomas, M.; De Rycker, M.; Chung, C. W.; Pena, I.; Bingham, R. P.; Bueren-Calabuig, J. A.; Cantizani, J.; Cebrian, D.; Craggs, P. D.; Ferguson, L.; Goswami, P.; Hobrath, J.; Howe, J.; Jeacock, L.; Ko, E. J.; Korczynska, J.; MacLean, L.; Manthri, S.; Martinez, M. S.; Mata-Cantero, L.; Moniz, S.; Nuhs, A.; Osuna-Cabello, M.; Pinto, E.; Riley, J.; Robinson, S.; Rowland, P.; Si…	Visceral leishmaniasis (VL), caused by the protozoan parasites Leishmania donovani and Leishmania infantum, is one of the major parasitic diseases worldwide. There is an urgent need for new drugs to treat VL, because current therapies are unfit for purpose in a resource-poor setting. Here, we describe the development of a preclinical drug candidate, GSK3494245/DDD01305143/compound 8, with potenti…	2019	2007-05-01	Proceedings of the National Academy of Sciences of the United States of America	116	19	9318-9323	30962368	https://dx.doi.org/10.1073/pnas.1820175116	Wyllie 2019
A Practical Green Synthesis and Biological Evaluation of Benzimidazoles Against Two Neglected Tropical Diseases: Chagas and Leishmaniasis	Bandyopadhyay, D.; Samano, S.; Villalobos-Rocha, J. C.; Sanchez-Torres, L. E.; Nogueda-Torres, B.; Rivera, G.; Banik, B. K.	Antimicrobial resistance is an ever-increasing problem throughout the world and has already reached severe proportions. Two very common neglected tropical diseases are Chagas' disease and leishmaniasis. Chagas' disease is a severe health problem, mainly in Latin America, causing approximately 50000 deaths a year and millions of people are infected. About 25-30% of the patients infected with Trypa…	2017		Current Medicinal Chemistry	24	41	4714-4725	23317160	https://dx.doi.org/10.2174/0929867325666171201101807	Bandyopadhyay 2017
Potential Utility of Protein Targets of Cysteine-S-Nitrosylation in Identifying Clinical Disease Status in Human Chagas Disease	Zago, M. P.; Wiktorowicz, J. E.; Spratt, H.; Koo, S. J.; Barrientos, N.; Nunez Burgos, A.; Nunez Burgos, J.; Iniguez, F.; Botelli, V.; Leon de la Fuente, R.; Garg, N. J.	Trypanosoma cruzi (Tc) infection causes Chagas disease (ChD) presented by dilated cardiomyopathy and heart failure. During infection, oxidative and nitrosative stresses are elicited by the immune cells for control the pathogen; however, excess nitric oxide and superoxide production can result in cysteine S-nitrosylation (SNO) of host proteins that affects cellular homeostasis and may contribute t…	2018		Frontiers in Microbiology	9		3320	30697201	https://dx.doi.org/10.3389/fmicb.2018.03320	Zago 2018
Potential application of small myristoylated protein-3 evaluated as recombinant antigen and a synthetic peptide containing its linear B-cell epitope for the serodiagnosis of canine visceral and human tegumentary leishmaniasis	Salles, B. C. S.; Dias, D. S.; Steiner, B. T.; Lage, D. P.; Ramos, F. F.; Ribeiro, P. A. F.; Santos, T. T. O.; Lima, M. P.; Costa, L. E.; Chaves, A. T.; Chavez-Fumagalli, M. A.; Fujiwaraa, R. T.; Buenoa, L. L.; Caligiorne, R. B.; de Magalhaes-Soares, D. F.; Silveira, J. A. G.; Machado-de-Avila, R. A.; Goncalves, D. U.; Coelho, E. A. F.	Serological tests are important tools for the diagnosis of Leishmania infection. However, they are not effective markers to diagnose asymptomatic cases of visceral leishmaniasis (VL) and patients developing tegumentary leishmaniasis (TL), since antileishmanial antibodies can be encountered in low levels resulting in false-negative results in the serological trials. In this context, antigens able …	2019	January	Immunobiology	224	1	163-171	2001129800	http://dx.doi.org/10.1016/j.imbio.2018.09.003	Salles 2019
Potent and selective inhibitors for M32 metallocarboxypeptidases identified from high-throughput screening of anti-kinetoplastid chemical boxes	Salas-Sarduy, E.; Landaburu, L. U.; Carmona, A. K.; Cazzulo, J. J.; Aguero, F.; Alvarez, V. E.; Niemirowicz, G. T.	Enzymes of the M32 family are Zn-dependent metallocarboxypeptidases (MCPs) widely distributed among prokaryotic organisms and just a few eukaryotes including Trypanosoma brucei and Trypanosoma cruzi, the causative agents of sleeping sickness and Chagas disease, respectively. These enzymes are absent in humans and several functions have been proposed for trypanosomatid M32 MCPs. However, no synthe…	2019	Jul		13	7	e0007560	31329594	https://dx.doi.org/10.1371/journal.pntd.0007560	Salas-Sarduy 2019
Possible oral transmission of Chagas disease among hydrocarbons sector workers in Casanare, Colombia, 2014. [Spanish]	Zuleta-Duenas, L. P.; Lopez-Quiroga, A. J.; Torres-Torres, F.; Castaneda-Porras, O.	INTRODUCTION: Trypanosoma cruzi, the etiological agent for Chagas disease, can be transmitted by oral intake of contaminated food or drinks. During epidemiological week 14 of 2014, two cases of acute Chagas disease were notified among hydrocarbons sector workers in Paz de Ariporo, Casanare. OBJECTIVE: To characterize the affected population, to establish control and prevention measures and to con…	2017	2021-06-01	Biomedica : revista del Instituto Nacional de Salud	37	2	218-232	620170989	http://dx.doi.org/10.7705/biomedica.v37i3.3153	Zuleta-Duenas 2017
Portable and power-free serodiagnosis of Chagas disease using magnetic levitating microbeads	Castro, B.; Sala de Medeiros, M.; Sadri, B.; Martinez, R. V.	This work describes the detection of anti-T. cruzi antibodies in whole blood solutions using magnetic levitating microbeads (MLmuBs). This simple diagnostic method can be easily performed by minimally trained personnel using an inexpensive and portable magnetic stage that requires no electricity. A multiphase test tube containing the MLmuBs facilitates the sequential incubation, filtering, and re…	2018	2021-09-01	Analyst	143	18	4379-4386	30123917	https://dx.doi.org/10.1039/c8an01374h	Castro 2018
Polysaccharides-based multiparticulated interpolyelectrolyte complexes for controlled benznidazole release	Garcia, M. C.; Manzo, R. H.; Jimenez-Kairuz, A.	Polysaccharides-based delivery systems and interpolyelectrolyte complexes (IPECs) are interesting alternatives to control the release of drugs, thereby improving therapies. Benznidazole (BZ) is the selected drug for Chagas disease pharmacotherapy. However, its side effects limit its efficacy and safety. We developed novel multiparticulated BZ-loaded IPECs based on chitosan and alginic acid, and i…	2018	2010-07-01	International Journal of Pharmaceutics	545	2021-02-01	366-377	29747000	https://dx.doi.org/10.1016/j.ijpharm.2018.05.017	Garcia 2018
Polypharmacology in the treatment of Chagas disease	Aguilera, E.; Alvarez, G.; Cerecetto, H.; Gonzalez, M.	The current treatment of Chagas disease is based on monopharmacology where the used drugs have limited efficacy and severe side effects. In order to overcome these limitations some tools have been described including development or isolation of new drugs, drug repositioning, and polypharmacology. Here we review the polypharmacology strategy where compounds belonging to different structural chemot…	2018	2009-04-01	Current Medicinal Chemistry	9		9	29637852	https://dx.doi.org/10.2174/0929867325666180410101728	Aguilera 2018
Polyparasitism and zoonotic parasites in dogs from a rural area of the Argentine Chaco	Enriquez, G. F.; Macchiaverna, N. P.; Argibay, H. D.; Lopez Arias, L.; Farber, M.; Gurtler, R. E.; Cardinal, M. V.; Garbossa, G.	Dogs play an important role as reservoirs and hosts of multiple pathogens shared with humans and wildlife, which contribute significantly to the global burden of disease. Here, we assessed the occurrence of a broad range of zoonotic and non-zoonotic parasites in dogs from a rural area in the humid Chaco; determined the occurrence of polyparasitism; and explored its association with selected risk …	2019	Apr	Veterinary parasitology Regional Studies And Reports	16		100287	31027600	https://dx.doi.org/10.1016/j.vprsr.2019.100287	Enriquez 2019
Polyclonal antibodies for the detection of Trypanosoma cruzi circulating antigens	Malaga-Machaca, E. S.; Romero-Ramirez, A.; Gilman, R. H.; Astupina-Figueroa, S.; Angulo, N.; Florentini, A.; Lovon-Luque, C. J.; Gonza, R. A.; del Carpio-Sanz, A.; Cabello, I.; Camargo, R.; Recuenco, F.; Barrueta-Soria, L. A.; Verastegui, M. R.; Calderon, M.; Mayta, H.	Background: Detection of Trypanosoma cruzi antigens in clinical samples is considered an important diagnostic tool for Chagas disease. The production and use of polyclonal antibodies may contribute to an increase in the sensitivity of immunodiagnosis of Chagas disease. Methodology/Principal findings: Polyclonal antibodies were raised in alpacas, rabbits, and hens immunized with trypomastigote exc…	2017	2021-11-09	PLoS Negl Trop Dis	11 (11) (no pagination)	e0006069		619495155	http://dx.doi.org/10.1371/journal.pntd.0006069	Malaga-Machaca 2017
Performance of recombinant chimeric proteins in the serological diagnosis of Trypanosoma cruzi infection in dogs	Leony, L. M.; Freitas, N. E. M.; Del-Rei, R. P.; Carneiro, C. M.; Reis, A. B.; Jansen, A. M.; Xavier, S. C. C.; Gomes, Y. M.; Silva, E. D.; Reis, M. G.; Fraga, D. B. M.; Celedon, P. A. F.; Zanchin, N. I. T.; Dantas-Torres, F.; Santos, F. L. N.	BACKGROUND: Dogs are considered sentinels in areas of Trypanosoma cruzi transmission risk to humans. ELISA is generally the method of choice for diagnosing T. cruzi exposure in dogs, but its performance substantially depends on the antigenic matrix employed. In previous studies, our group has developed four chimeric antigens (IBMP-8.1, 8.2, 8.3, and 8.4) and evaluated their potential for diagnosi…	2019	Jun		13	6	e0007545	31242195	https://dx.doi.org/10.1371/journal.pntd.0007545	Leony 2019
Performance of a new automated assay for antibodies to t. cruzi on the alinity s system	Smith, D.; Paradowski, M.; Bryant, J.; Callear, K.; Worobec, S.; Schlauder, G.; Williams, G.	Background: The parasite, Trypanosoma cruzi (T. cruzi), is the cause of Chagas disease which is endemic to the Americas and infects 6-8 million people. In order to prevent transfusion mediated transmission of this parasite in endemic countries, blood collection centers require high throughput anti-T. cruzi assays with good specificity and sensitivity. In non-endemic countries, selective testing o…	2017	June	Vox Sanguinis	112 (Supplement 1)		183-184	616916963	http://dx.doi.org/10.1111/vox.12530	Smith 2017
Performance of a new automated alinity s assay for antibodies to T. Cruzi	Smith, D.; Bakker, E.; Van Weert, A.; Bryant, J.; Paradowski, M.; Fleischmann, L.; Sarac, M.; Chen, G.; Schlauder, G.; Williams, G.	Background/Case Studies: The parasite, Trypanosoma cruzi (T. cruzi), is the cause of Chagas disease which is endemic to the Americas and infects 6-8 million people. In order to prevent transfusion mediated transmission of this parasite in endemic countries, blood collection centers require high throughput anti-T. cruzi assays with good specificity and sensitivity. In nonendemic countries, selecti…	2017	September	Transfusion	57 (Supplement 3)		197A	618448411	http://dx.doi.org/10.1111/trf.14286	Smith 2017
Performance evaluation of anti-fixed Leishmania infantum promastigotes immunoglobulin G (IgG) detected by flow cytometry as a diagnostic tool for visceral Leishmaniasis	Silva, E. D.; Oliveira, B. C.; Oliveira, A. P.; Santos, W. J. T.; Diniz, G. T.; de Melo Neto, O. P.; Costa, C. H. N.; Silva, M. R. B.; Andrade, L. D.; Medeiros, Z. M.; Pereira, V. R. A.	Visceral Leishmaniasis (VL) is a severe disease, caused by the protozoans Leishmania infantum and L. donovani that is widely diagnosed using serological tools. These, however, have limitations in performance that limit their use for the correct identification of the cases. This study aimed to evaluate the performance of flow cytometry with fixed parasites for VL diagnosis, comparing it with four …	2019	Jun	Journal of Immunological Methods	469		18-25	30817916	https://dx.doi.org/10.1016/j.jim.2019.02.009	Silva 2019
Pep5, a Fragment of Cyclin D2, Shows Antiparasitic Effects in Different Stages of the Trypanosoma cruzi Life Cycle and Blocks Parasite Infectivity	de Araujo, C. B.; de Lima, L. P.; Calderano, S. G.; Silva Damasceno, F.; Silber, A. M.; Elias, M. C.	Pep5 (WELVVLGKL) is a fragment of cyclin D2 that exhibits a 2-fold increase in the S phase of the HeLa cell cycle. When covalently bound to a cell-penetrating peptide (Pep5-cpp), the nonapeptide induces cell death in several tumor cells, including breast cancer and melanoma cells. Additionally, Pep5-cpp reduces the in vivo tumor volume of rat glioblastoma. Chagas disease, which is caused by the f…	2019	May	Antimicrobial Agents & Chemotherapy	63	5		30833431	https://dx.doi.org/10.1128/AAC.01806-18	deAraujo 2019
Pentose Phosphate Shunt Modulates Reactive Oxygen Species and Nitric Oxide Production Controlling Trypanosoma cruzi in Macrophages	Koo, S. J.; Szczesny, B.; Wan, X.; Putluri, N.; Garg, N. J.	Metabolism provides substrates for reactive oxygen species (ROS) and nitric oxide (NO) generation, which are a part of the macrophage (Mphi) anti-microbial response. Mphis infected with Trypanosoma cruzi (Tc) produce insufficient levels of oxidative species and lower levels of glycolysis compared to classical Mphis. How Mphis fail to elicit a potent ROS/NO response during infection and its link t…	2018		Frontiers in Immunology	9		202	29503646	https://dx.doi.org/10.3389/fimmu.2018.00202	Koo 2018
PD1 and PDL1 molecules control suppressor activity of regulatory T cells in chronic Chagas cardiomyopathy patients	Damasio, M. P. S.; Rocha, M. O. C.; Sousa, G. R.; Ferreira, K. S.; Fares-Gusmao, R. C. G.; Medeiros, N. I.; Araujo, F. F.; Chaves, A. T.; Dutra, W. O.; Correa-Oliveira, R.; Gomes, J. A. S.	Introduction: Chagas disease, caused by the protozoan Trypanosoma cruzi (T. cruzi), is the fourth most important tropical disease, which affects approximately 7 million people worldwide. The mechanisms involved in the development of this disease are not completely well understood. An important protective role of regulatory T cells (Treg) in Chagas disease has been observed; however, the specific …	2019	July	Human Immunology	80	7	517-522	2001729956	http://dx.doi.org/10.1016/j.humimm.2019.03.009	Damasio 2019
PCR monitoring of parasitemia during drug treatment for canine Chagas disease	Zao, C. L.; Yang, Y. C.; Tomanek, L.; Cooke, A.; Berger, R.; Chien, L. C.; Madigan, R.	To date, there is no clear standard to monitor drug treatment for canine Chagas disease. We used 2 real-time PCR (rtPCR) assays targeting Trypanosoma cruzi kinetoplast DNA (kDNA) and nuclear satellite DNA (nDNA) to detect T. cruzi in canine whole blood. Samples were collected randomly from 131 untreated dogs with unknown T. cruzi infection status in Texas. The kDNA-based rtPCR was slightly more s…	2019	2005-08-01	Journal of Veterinary Diagnostic Investigation			1040638719868500	31378166	https://dx.doi.org/10.1177/1040638719868508	Zao 2019
Patterns of vector species richness and species composition as drivers of Chagas disease occurrence in Brazil	Eduardo, A. A.; Santos, Labo; Reboucas, M. C.; Martinez, P. A.	Chagas disease represents one of the major health issue in Latin America. Epidemiological control is focused on disease vectors, so studies on the ecology of triatomine vectors constitute a central strategy. Recently, research at large spatial scale has been produced, and authors commonly rely on the assumption that geographical regions presenting good environmental conditions for most vector spe…	2018	Dec	International Journal of Environmental Health Research	28	6	590-598	30063379	https://dx.doi.org/10.1080/09603123.2018.1497776	Eduardo 2018
New cycloartane-type ester triterpenes from Euphorbia pterococca and biological evaluation	Benabdelaziz, I.; Gomez-Ruiz, S.; Benkhaled, M.; Carralero, S.; Schenker, P.; Salm, A.; Gertsch, J.; Haba, H.	From acetonic extract of the whole plant Euphorbia pterococca Brot. (Euphorbiaceae), four new cycloartane-type ester triterpenes named cycloartenyl-2'E,4'E-decadienoate (1), cycloartenyl-2'E,4'Z-decadienoate (2), 24-methylenecycloartanyl-2'E,4'Z-tetradecadienoate (3), and 24-oxo-29-norcycloartanyl-2'E,4'Z-hexadecadienoate (4) were obtained along with nine known tetracyclic triterpenes (5-13). The…	2018	June	Fitoterapia	127		271-278	621199895	http://dx.doi.org/10.1016/j.fitote.2018.02.027	Benabdelaziz 2018
New aziridine-based inhibitors of cathepsin L-like cysteine proteases with selectivity for the Leishmania cysteine protease LmCPB2.8	Fey, P.; Chartomatsidou, R.; Kiefer, W.; Mottram, J. C.; Kersten, C.; Schirmeister, T.	In the present work a series of aziridine-2,3-dicarboxylate inhibitors of papain-like cysteine proteases was designed, synthesized and tested. The compounds displayed selectivity for the parasitic protozoon Leishmania mexicana cathepsin L-like cysteine protease LmCPB2.8. The computational methods of homology modelling and molecular docking predicted some significant differences in the S2 pocket o…	2018	2005-08-01	European Journal of Medicinal Chemistry	156		587-597	30029081	https://dx.doi.org/10.1016/j.ejmech.2018.07.012	Fey 2018
New aptamer-based biosensors for the detection of chagas disease	Penaranda, K.; Verastegui, M.; Milon, P.	Chagas is an infectious disease that generates severe morbidity and affects approximately eight million humans in the Americas. Although the clinical symptoms of Chagas disease are well characterized, direct detection of the parasite that causes it remains a challenge. In this work, bioinformatic and in vitro evolution techniques were used to identify new biomarkers and to develop aptamers as new…	2018	October	American Journal of Tropical Medicine and Hygiene	99 (4 Supplement)		179	627540075		Penaranda 2018
New antigens for the serological diagnosis of human visceral leishmaniasis identified by immunogenomic screening	Carvalho, Amrs; Mendes, T. A. O.; Coelho, E. A. F.; Duarte, M. C.; Menezes-Souza, D.	Visceral leishmaniasis (VL) still represents a serious public health problem in Brazil due to the inefficiency of the control measures currently employed, that included early diagnosis and treatment of human cases, vector control, euthanasia of infected dogs and, recently approved in Brazil, treatment with Milteforam drug. Effective clinical management depend largely on early and unequivocal diag…	2018			13	12	e0209599	30571783	https://dx.doi.org/10.1371/journal.pone.0209599	Carvalho 2018
The neuropeptide CCHamide2 regulates diuresis in the Chagas disease vector Rhodnius prolixus	Capriotti, N.; Ianowski, J. P.; Gioino, P.; Ons, S.	Given that hematophagous insects ingest large quantities of blood in a single meal, they must undergo a rapid post-prandial diuresis in order to maintain homeostasis. In the kissing bug Rhodnius prolixus (Hemiptera: Reduviidae), the coordinated activity of the Malpighian tubules and anterior midgut maintains water and ion balance during the post-prandial diuresis. Three to four hours after the me…	2019	2022-05-01	Journal of Experimental Biology	222	Pt 10	22	31053646	https://dx.doi.org/10.1242/jeb.203000	Capriotti 2019
Neuronal depopulation, not silent cerebrovascular disease, mediate cognitive dysfunction in chagas disease	Oliveira-Filho, J.; Muinos, P. J. R.; Pereira, C. B.; Porto, L. M.; Goncalves, B. M. M.; Andrade, A. L.; Sousa, P. R. S. P.; Santos, L. S. B.; Catto, M. B.; Maia, R. M.; Silva, T. C.; Serrano, C. J.; Garcia, K. O.; Reis, T.; Alvarenga, J. C.; Jesus, P. A. P.; Ribeiro, A. L. P.; Nunes, M. C. P.; Furie, K. L.	Background and Aims: Chagas disease is associated with cognitive dysfunction, but its mechanism in not well known, especially in strokefree individuals. We aimed to investigate brain imaging biomarkers as potential mediators of cognitive dysfunction. Method: Cross-sectional study of stroke-free individuals from a university-based heart failure clinic. Chagas exposure was defined by ELISA serologi…	2018	May	European Stroke Journal	3 (1 Supplement 1)		480	622487320	http://dx.doi.org/10.1177/2396987318770127	Oliveira-Filho 2018
Neuronal depopulation, not silent cerebrovascular disease, mediate cognitive dysfunction in chagas disease	Oliveira-Filho, J.; Muinos, P. J. R.; Pereira, C. B.; Porto, L. M.; Goncalves, B. M. M.; Andrade, A. L.; Sousa, P. R. S. P.; Santos, L. S. B.; Catto, M. B.; Maia, R. M.; Silva, T. C.; Serrano, C. J.; Garcia, K. O.; Reis, T.; Alvarenga, J. C.; Jesus, P. A. P.; Ribeiro, A. L. P.; Nunes, M. C. P.; Furie, K. L.	Background: Chagas disease is associated with cognitive dysfunction, but its mechanism in not well known, especially in stroke-free individuals. Method(s): Cross-sectional study of stroke-free individuals from a university-based heart failure clinic. Chagas exposure was defined by ELISA serologic test. Stroke was excluded based on the Questionnaire for Verifying Stroke-Free Status. Individuals un…	2018	October	International Journal of Stroke	13 (2 Supplement 1)		66	624945926	http://dx.doi.org/10.1177/1747493018789543	Oliveira-Filho 2018
Neurologic infections in immigrants	El Alaoui Faris, M.	The geopolitical factors that influence human migration are complex and subject to change often influenced by regional conflicts. In addition to the political and economic impacts, the health conditions of the immigrant population must also be taken into consideration. Migrants and refugees are particularly vulnerable to infectious diseases because they have often traveled in difficult and challe…	2018	June	European Journal of Neurology	25 (Supplement 2)		669	623297833		ElAlaouiFaris 2018
Neuroinvasions caused by parasites	Dzikowiec, M.; Goralska, K.; Blaszkowska, J.	Parasitic diseases of the central nervous system are associated with high mortality and morbidity. Many human parasites, such as Toxoplasma gondii, Entamoeba histolytica, Trypanosoma cruzi, Taenia solium, Echinococcus spp., Toxocara canis, T. cati, Angiostrongylus cantonensis, Trichinella spp., during invasion might involve the CNS. Some parasitic infections of the brain are lethal if left untrea…	2017		Annals of parasitology	63	4	243-253	29385325	https://dx.doi.org/10.17420/ap6304.111	Dzikowiec 2017
Neglected tropical diseases: A proxy for equitable development and shared prosperity	Engels, D.		2017	2021-04-20	PLoS Negl Trop Dis	11 (4) (no pagination)	e0005419		615947417	http://dx.doi.org/10.1371/journal.pntd.0005419	Engels 2017
Neglected tropical diseases in children: An assessment of gaps in research prioritization	Rees, C. A.; Hotez, P. J.; Monuteaux, M. C.; Niescierenko, M.; Bourgeois, F. T.	Background: Despite the known burden of neglected tropical diseases (NTDs) on child health, there is limited information on current efforts to increase pediatric therapeutic options. Our objective was to quantify and characterize research activity and treatment availability for NTDs in children in order to inform the prioritization of future research efforts. Methodology/Principal findings: We co…	2019		PLoS Negl Trop Dis	13 (1) (no pagination)	e0007111		2001516167	http://dx.doi.org/10.1371/journal.pntd.0007111	Rees 2019
Neglected tropical diseases in Brazilian children and adolescents: Data analysis from 2009 to 2013	Brandao, E.; Romero, S.; da Silva, M. A. L.; Santos, F. L. N.	Background: Neglected tropical diseases (NTDs) prevail in conditions of poverty and contribute to the maintenance of social inequality. Out of the NTDs prioritized by the Brazilian Ministry of Health, four parasitic infections require mandatory notification: acute Chagas disease, leishmaniasis, malaria, and schistosomiasis. Data on the behaviour of these NTDs in the young population are currently…	2017	2021-11-03	Infectious Diseases of Poverty	6 (1) (no pagination)	154		619047035	http://dx.doi.org/10.1186/s40249-017-0369-0	Brandao 2017
Neglected Populations, Neglected Diseases	Panhuis, J.		2018	2021-04-07	European Heart Journal	39	14	1124-1127	621703804	http://dx.doi.org/10.1093/eurheartj/ehy139	Panhuis 2018
Natural trypanocidal product produced by endophytic fungi through co-culturing	do Nascimento, J. S.; Silva, F. M.; Magallanes-Noguera, C. A.; Kurina-Sanz, M.; Dos Santos, E. G.; Caldas, I. S.; Luiz, J. H. H.; Silva, E. O.	Endophytic fungi live inside vegetal tissues without causing damage to the host plant and may provide lead compounds for drug discovery. The co-culture of two or more endophytic fungi can trigger silent gene clusters, which could lead to the isolation of bioactive compounds. In this study, two endophytic strains isolated from Handroanthus impetiginosus leaves, identified as Talaromyces purpurogen…	2019	2027-06-01	Folia Microbiologica	27		27	31250361	https://dx.doi.org/10.1007/s12223-019-00727-x	doNascimento 2019
More effective prediction of mortality in Chagas heart disease patients? Importance of cardiopulmonary stress testing	Brizida, L. M.		2017	December	Revista Portuguesa de Cardiologia	36	12	935-936	620886160	http://dx.doi.org/10.1016/j.repc.2017.11.004	Brizida 2017
Molecular Genotyping of Trypanosoma cruzi by Next-Generation Sequencing of the Mini-Exon Gene Reveals Infections With Multiple Parasite Discrete Typing Units in Chagasic Patients From Yucatan, Mexico	Villanueva-Lizama, L.; Teh-Poot, C.; Majeau, A.; Herrera, C.; Dumonteil, E.	The diversity of Trypanosoma cruzi parasites infecting humans is still poorly understood. We used deep sequencing to analyze this diversity in chagasic patients from Mexico. Such information is crucial to understand transmission cycles and to identify determinants of epidemiological and clinical characteristics of the infection. We analyzed parasite mini-exon spliced-leader sequences following am…	2019	2024-05-01	Journal of Infectious Diseases	219	12	1980-1988	30721973	https://dx.doi.org/10.1093/infdis/jiz047	Villanueva-Lizama 2019
Molecular Epidemiology of Trypanosomatids and Trypanosoma cruzi in Primates from Peru	Aysanoa, E.; Mayor, P.; Mendoza, A. P.; Zariquiey, C. M.; Morales, E. A.; Perez, J. G.; Bowler, M.; Ventocilla, J. A.; Gonzalez, C.; Baldeviano, G. C.; Lescano, A. G.	We determined the prevalence rate and risk of infection of Trypanosoma cruzi and other trypanosomatids in Peruvian non-human primates (NHPs) in the wild (n = 126) and in different captive conditions (n = 183). Blood samples were collected on filter paper, FTA cards, or EDTA tubes and tested using a nested PCR protocol targeting the 24Salpha rRNA gene. Main risk factors associated with trypanosoma…	2017	2021-12-01	EcoHealth	14	4	732-742	623645430	http://dx.doi.org/10.1007/s10393-017-1271-8	Aysanoa 2017
Molecular Dynamics Simulations of Substrate Release from Trypanosoma cruzi UDP-Galactopyranose Mutase	Cossio-Perez, R.; Pierdominici-Sottile, G.; Sobrado, P.; Palma, J.	The enzyme UDP-galactopyranose mutase (UGM) represents a promising drug target for the treatment of infections with Trypanosoma cruzi. We have computed the Potential of Mean Force for the release of UDP-galactopyranose from UGM, using Umbrella Sampling simulations. The simulations revealed the conformational changes that both substrate and enzyme undergo during the process. It was determined that…	2019	2021-02-25	Journal of chemical information and modeling	59	2	809-817	626524425	http://dx.doi.org/10.1021/acs.jcim.8b00675	Cossio-Perez 2019
Molecular Docking Studies Applied to a Dataset of Cruzain Inhibitors	da Silva-Junior, E. F.; Barcellos Franca, P. H.; Ribeiro, F. F.; Bezerra Mendonca-Junior, F. J.; Scotti, L.; Scotti, M. T.; de Aquino, T. M.; de Araujo-Junior, J. X.	BACKGROUND: Chagas' disease is one of the main causes of heart failure in developing countries. The disadvantages of current therapy include the undesirable side-effects, resistance, and therapeutic adhesion. The development of new efficient and safe drugs is, therefore, an issue of extreme importance._x000D_OBJECTIVES: In order to gain a better understanding of how the compounds interact with th…	2018		Current Computer-aided Drug Design	14	1	68-78	28523999	https://dx.doi.org/10.2174/1573409913666170519112758	daSilva-Junior 2018
Molecular description of alpha-keto-based inhibitors of cruzain with activity against Chagas disease combining 3D-QSAR studies and molecular dynamics	Saraiva, A. P. B.; Miranda, R. M.; Valente, R. P. P.; Araujo, J. O.; Souza, R. N. B.; Costa, C. H. S.; Oliveira, A. R. S.; Almeida, M. O.; Figueiredo, A. F.; Ferreira, J. E. V.; Alves, C. N.; Honorio, K. M.	In this work, a group of alpha-keto-based inhibitors of the cruzain enzyme with anti-chagas activity was selected for a three-dimensional quantitative structure-activity relationship study (3D-QSAR) combined with molecular dynamics (MD). Firstly, statistical models based on Partial Least Square (PLS) regression were developed employing comparative molecular field analysis (CoMFA) and comparative …	2018	8	Chemical Biology & Drug Design	92	2	1475-1487	29682904	https://dx.doi.org/10.1111/cbdd.13313	Saraiva 2018
Molecular characterization of Trypanosoma cruzi samples derived from Triatoma vitticeps and Panstrongylus geniculatus of the Atlantic rainforest, southeast Brazil	Dario, M. A.; Andrade, T. E. S.; Dos Santos, C. B.; Fux, B.; Brandao, A. A.; Falqueto, A.	BACKGROUND: In rural areas of Espirito Santo state, southeast Brazil, triatomine species attracted by light frequently invade residences. The aim of this study was to investigate the Trypanosoma cruzi discrete typing units (DTUs) harbored by these triatomines._x000D_METHODS: Triatomine's intestinal contents were examined, inoculated in mice, and the positive samples were cultivated. Flagellates o…	2018		Parasite	25		59	30474600	https://dx.doi.org/10.1051/parasite/2018060	Dario 2018
Molecular characterization of Trypanosoma cruzi in infected Meccus pallidipennis in the southern region of the State of Mexico, Mexico	Lopez-Vivas, F. I.; Vazquez-Chagoyan, J. C.; Acosta-Dibarrat, J. P.; Medina-Torres, I.; Diaz-Albiter, H. M.; Fernandez-Rosas, P.; De Oca-Jimenez, R. M.	PCR amplification and sequencing of Trypanosoma cruzi (T. cruzi) spliced-leader intergenic region of the mini-exon gene intergenic region (SL-IR) fragment was performed on intestinal tissue and fecal content DNA extracted from 19 Meccus pallidipennis (M. pallidipennis) specimens collected in the southern region of the State of Mexico. DNA sequence analysis from 49 bp T. cruzi SL-IR showed that al…	2018	December	Vector-Borne and Zoonotic Diseases	18	12	683-689	625354931	http://dx.doi.org/10.1089/vbz.2018.2287	Lopez-Vivas 2018
Molecular characterization of Trypanosoma cruzi in 4 Chagas disease patients infected by different routes of transmission	Moure, Z.; Sulleiro, E.; Ibanez, I.; Rubio, J. M.; Martin, A.; Nieto, J.; Pumarola, T.; Flores Chavez, M.	Introduction Trypanosoma cruzi, the etiological agent of Chagas disease (CD) is characterized by a tremendous genetic diversity. Different typing methods have made it possible to classified the parasite into six genetic groups (discrete typing units, DTUs), named TcI to Tc VI. Beyond the vectorial transmission, limited to endemic areas, other routes of transmission are blood transfusion, organ tr…	2017	October	Tropical Medicine and International Health	22 (Supplement 1)		134	618977606	http://dx.doi.org/10.1111/%28ISSN%291365-3156	Moure 2017
Modelling historical changes in the force-of-infection of Chagas disease to inform control and elimination programmes: application in Colombia	Cucunuba, Z. M.; Nouvellet, P.; Conteh, L.; Vera, M. J.; Angulo, V. M.; Dib, J. C.; Parra-Henao, G. J.; Basanez, M. G.	Background: WHO's 2020 milestones for Chagas disease include having all endemic Latin American countries certified with no intradomiciliary Trypanosoma cruzi transmission, and infected patients under care. Evaluating the variation in historical exposure to infection is crucial for assessing progress and for understanding the priorities to achieve these milestones._x000D_Methods: Focusing on Colom…	2017		BMJ Global Health	2	3	e000345	29147578	https://dx.doi.org/10.1136/bmjgh-2017-000345	Cucunuba 2017
Modeling the Spatial Spread of Chagas Disease	Steindorf, V.; Maidana, N. A.	The aim of this work is to understand the spatial spread of Chagas disease, which is primarily transmitted by triatomines. We propose a mathematical model using a system of partial differential reaction-diffusion equations to study and describe the spread of this disease in the human population. We consider the respective subclasses of infected and uninfected individuals within the human and tria…	2019	Jun	Bulletin of mathematical biology	81	6	1687-1730	30805855	https://dx.doi.org/10.1007/s11538-019-00581-5	Steindorf 2019
A model of insect control with imperfect treatment	Oduro, B.; Grijalva, M. J.; Just, W.	Insecticide spraying of housing units is an important control measure for vector-borne infections such as Chagas disease. However, some vectors may survive treatment, due to imperfect spraying by the operator or because they hide deep in the cracks or other places, and re-emerge in the same unit when the effect of the insecticide wears off. While several mathematical models of this phenomenon hav…	2019	Dec	Journal of biological dynamics	13	1	518-537	31290728	https://dx.doi.org/10.1080/17513758.2019.1640293	Oduro 2019
Mitochondrial permeability transition in protozoan parasites: what we learned from Trypanosoma cruzi	Bustos, P. L.; Perrone, A. E.; Milduberger, N. A.; Bua, J.		2017	09 21	Cell Death & Disease	8	9	e3057	28933785	https://dx.doi.org/10.1038/cddis.2017.431	Bustos 2017
Mitochondrial genomes of three kissing bugs (Reduviidae: Triatominae) and their phylogenetic implications	Zhao, Y.; Jiang, M.; Wu, Y.; Song, F.; Cai, W.; Li, H.	The reduviid subfamily Triatominae, also called kissing bugs, are vectors of Chagas disease, which is one of the most seriously neglected tropical parasitic diseases. Only three complete mitochondrial genomes of kissing bugs from the genus Triatoma have been sequenced to date. To better understand the diversity of mitochondrial genomes and the evolution of kissing bugs, mitochondrial genomes of t…	2019	2001-08-01	International Journal of Biological Macromolecules	134		36-42	31071392	https://dx.doi.org/10.1016/j.ijbiomac.2019.05.020	Zhao 2019
Mitochondrial disfunction and ROS production are essential for anti-Trypanosoma cruzi activity of beta-lapachone-derived naphthoimidazoles	Bombaca, A. C. S.; Viana, P. G.; Santos, A. C. C.; Silva, T. L.; Rodrigues, A. B. M.; Guimaraes, A. C. R.; Goulart, M. O. F.; da Silva Junior, E. N.; Menna-Barreto, R. F. S.	Chagas disease is caused by the hemoflagellate protozoa Trypanosoma cruzi and is one of the most important neglected tropical diseases, especially in Latin American countries, where there is an association between low-income populations and mortality. The nitroderivatives used in current chemotherapy are far from ideal and present severe limitations, justifying the continuous search for alternati…	2019	1	Free Radical Biology & Medicine	130		408-418	30445126	https://dx.doi.org/10.1016/j.freeradbiomed.2018.11.012	Bombaca 2019
MiR-150-5p retards the progression of myocardial fibrosis by targeting EGR1	Shen, J.; Xing, W.; Gong, F.; Wang, W.; Yan, Y.; Zhang, Y.; Xie, C.; Fu, S.	To investigate the differential expression of microRNA-150-5p (miR-150-5p) and early growth response 1 (EGR1) in myocardial fibrosis (MF) cells, and determine the effect between miR-150-5p and EGR1 on MF. Human MF cells were generated via Trypanosoma cruzi (T. cruzi) infection, a mouse model of MF was generated via angiotensin II. The expression levels of miR-150-5p and EGR1 were detected by quan…	2019	Jun	Cell Cycle	18	12	1335-1348	31122130	https://dx.doi.org/10.1080/15384101.2019.1617614	Shen 2019
Maternal dietary patterns during pregnancy and intelligence quotients in the offspring at 8 years of age: findings from the ALSPAC cohort	Freitas-Vilela, A. A.; Pearson, R. M.; Emmett, P.; Heron, J.; Smith, Adac; Emond, A.; Hibbeln, J. R.; Castro, M. B. T.; Kac, G.	Dietary intake during pregnancy may influence child neurodevelopment and cognitive function. This study aims to investigate the associations between dietary patterns obtained in pregnancy and intelligence quotients (IQ) among offspring at 8 years of age. Pregnant women enrolled in the Avon Longitudinal Study of Parents and Children completed a food frequency questionnaire at 32 weeks' gestation (…	2017		Maternal & child nutrition	(no pagination)			CN-01371965	10.1111/mcn.12431	Freitas-Vilela 2017
Mast Cells and Serotonin Synthesis Modulate Chagas Disease in the Colon: Clinical and Experimental Evidence	Kannen, V.; Sakita, J. Y.; Carneiro, Z. A.; Bader, M.; Alenina, N.; Teixeira, R. R.; de Oliveira, E. C.; Brunaldi, M. O.; Gasparotto, B.; Sartori, D. C.; Fernandes, C. R.; Silva, J. S.; Andrade, M. V.; Silva, W. A.; Uyemura, S. A.; Garcia, S. B.	Background: Trypanosoma cruzi (T. cruzi) infects millions of Latin Americans each year and can induce chagasic megacolon. Little is known about how serotonin (5-HT) modulates this condition. Aim We investigated whether 5-HT synthesis alters T. cruzi infection in the colon. Materials and Methods: Forty-eight paraffin-embedded samples from normal colon and chagasic megacolon were histopathologicall…	2018	2021-06-01	Digestive Diseases and Sciences	63	6	1473-1484	621377165	http://dx.doi.org/10.1007/s10620-018-5015-6	Kannen 2018
Mast cell-nerve interaction in the colon of Trypanosoma cruzi-infected individuals with chagasic megacolon	Martins, P. R.; Nascimento, R. D.; dos Santos, A. T.; de Oliveira, E. C.; Martinelli, P. M.; d'Avila Reis, D.	Chagas disease is an infection caused by the parasite Trypanosoma cruzi that affects millions of people worldwide and is endemic in Latin America. Megacolon is the most frequent complication of the digestive chronic form and happens due to lesions of the enteric nervous system. The neuronal lesions seem to initiate in the acute phase and persist during the chronic phase, albeit the mechanisms inv…	2018	2021-04-01	Parasitology Research	117	4	1147-1158	620824214	http://dx.doi.org/10.1007/s00436-018-5792-z	Martins 2018
Mast cell coupling to the kallikrein-kinin system fuels intracardiac parasitism and worsens heart pathology in experimental chagas disease	Nascimento, C. R.; Andrade, D.; Carvalho-Pinto, C. E.; Serra, R. R.; Vellasco, L.; Brasil, G.; Ramos-Junior, E. S.; da Mota, J. B.; Almeida, L. N.; Andrade, M. V.; Soeiro, M. N. C.; Juliano, L.; Alvarenga, P. H.; Oliveira, A. C.; Sicuro, F. L.; de Carvalho, A. C. C.; Svensjo, E.; Scharfstein, J.	During the course of Chagas disease, infectious forms of Trypanosoma cruzi are occasionally liberated from parasitized heart cells. Studies performed with tissue culture trypomastigotes (TCTs, Dm28c strain) demonstrated that these parasites evoke neutrophil/CXCR2-dependent microvascular leakage by activating innate sentinel cells via toll-like receptor 2 (TLR2). Upon plasma extravasation, proteol…	2017	2021-08-02	Frontiers in Immunology	8 (AUG) (no pagination)	840		617605170	http://dx.doi.org/10.3389/fimmu.2017.00840	Nascimento 2017
The marsupial trypanosome Trypanosoma copemani is not an obligate intracellular parasite, although it adversely affects cell health	Cooper, C.; Andrew Thompson, R. C.; Rigby, P.; Buckley, A.; Peacock, C.; Clode, P. L.	BACKGROUND: Trypanosoma cruzi invades and replicates inside mammalian cells, which can lead to chronic Chagas disease in humans. Trypanosoma copemani infects Australian marsupials and recent investigations indicate it may be able to invade mammalian cells in vitro, similar to T. cruzi. Here, T. cruzi 10R26 strain (TcIIa) and two strains of T. copemani [genotype 1 (G1) and genotype 2 (G2)] were in…	2018	2020-09-01		11	1	521	30236162	https://dx.doi.org/10.1186/s13071-018-3092-1	Cooper 2018
Manifestations and strategies of coping with Chagas Disease that interfere in the quality of life of the individual: a systematic review	Cavalcanti, M. A. F.; Nascimento, E. G. C. D.; Alchieri, J. C.; Andrade, C. M.		2019	2021-04-01	Cien Saude Colet	24	4	1405-1416	627746630	http://dx.doi.org/10.1590/1413-81232018243.11842017	Cavalcanti 2019
Manganese superoxide dismutase deficiency exacerbates the mitochondrial ROS production and oxidative damage in Chagas disease	Wen, J. J.; Garg, N. J.	In this study, we have investigated the effects of manganese superoxide dismutase (SOD2 or MnSOD) deficiency on mitochondrial function and oxidative stress during Chagas disease. For this, C57BL/6 wild type (WT) and MnSOD+/- mice were infected with Trypanosoma cruzi (Tc), and evaluated at 150 days' post-infection that corresponded to chronic disease phase. Genetic deletion of SOD2 decreased the e…	2018	7		12	7	e0006687	30044789	https://dx.doi.org/10.1371/journal.pntd.0006687	Wen 2018
Management of severe strongyloidiasis attended at reference centers in Spain	Martinez-Perez, A.; Roure Diez, S.; Belhassen-Garcia, M.; Torrus-Tendero, D.; Perez-Arellano, J. L.; Cabezas, T.; Soler, C.; Diaz-Menendez, M.; Navarro, M.; Trevino, B.; Salvador, F.; Soil-Transmitted Helminths' Study Group of the Spanish Society of Tropical, Medicine; International, Health	INTRODUCTION: Strongyloides stercoralis is a globally distributed nematode that causes diverse clinical symptoms in humans. Spain, once considered an endemic country, has experienced a recent increase in imported cases. The introduction of serology helps diagnosis and is currently replacing microbiological techniques in some settings, but its sensitivity is variable and can be low in immunocompro…	2018	2		12	2	e0006272	29474356	https://dx.doi.org/10.1371/journal.pntd.0006272	Martinez-Perez 2018
MALDI-TOF MS protein profiling for the rapid identification of Chagas disease triatomine vectors and application to the triatomine fauna of French Guiana - CORRIGENDUM	Laroche, M.; Berenger, J. M.; Gazelle, G.; Blanchet, D.; Raoult, D.; Parola, P.		2018	4	Parasitology	145	5	676	29113600	https://dx.doi.org/10.1017/S0031182017001743	Laroche 2018
Major kinds of drug targets in Chagas disease or American Trypanosomiasis	Duschak, V. G.	Chagas disease, a parasitic infection commonly named American Trypanosomiasis affects millions of people all over Latin America. Presently, the number of international infected people estimated by the World Health Organization (WHO) amounts to 7 to 8 million and more than 10.000 deaths are assumed to happen yearly. The disease is an emergent disease elsewhere than non-endemic countries of the wor…	2019	2023-04-01	Current Drug Targets	23		23	31020939	https://dx.doi.org/10.2174/1389450120666190423160804	Duschak 2019
Maintenance of Trypanosoma cruzi, T. evansi and Leishmania spp. by domestic dogs and wild mammals in a rural settlement in Brazil-Bolivian border	Porfirio, G. E. O.; Santos, F. M.; de Macedo, G. C.; Barreto, W. T. G.; Campos, J. B. V.; Meyers, A. C.; Andre, M. R.; Perles, L.; de Oliveira, C. E.; Xavier, Scdc; Andrade, G. B.; Jansen, A. M.; Herrera, H. M.	Domestic dogs are considered reservoirs hosts for several vector-borne parasites. This study aimed to evaluate the role of domestic dogs as hosts for Trypanosoma cruzi, Trypanosoma evansi and Leishmania spp. in single and co-infections in the Urucum settlement, near the Brazil-Bolivian border. Additionally, we evaluated the involvement of wild mammals' in the maintenance of these parasites in the…	2018	Dec	International Journal for Parasitology.Parasites and Wildlife	7	3	398-404	30370220	https://dx.doi.org/10.1016/j.ijppaw.2018.10.004	Porfirio 2018
Lymphocyte Transformation Test (LTT) in Allergy to Benznidazole: A Promising Approach	Marques-Mejias, M. A.; Cabanas, R.; Ramirez, E.; Dominguez-Ortega, J.; Fiandor, A.; Trigo, E.; Quirce, S.; Bellon, T.	Benznidazole (Bzn) from the nitroimidazole family and nifurtimox from nitrofurans family, are drugs used as first and second line treatment for acute and chronic phases of Chagas disease (CD). Even though skin reactions are frequent, confirmed allergy to Bzn is rare, and there are few cases reported in the literature. Since CD treatment is very restrained, the possibility of cross-reactivity betw…	2019		Frontiers in Pharmacology	10		469	31164819	https://dx.doi.org/10.3389/fphar.2019.00469	Marques-Mejias 2019
Low-Level Parasite Persistence Drives Vasculitis and Myositis in Skeletal Muscle of Mice Chronically Infected with Trypanosoma cruzi	Weaver, J. D.; Hoffman, V. J.; Roffe, E.; Murphy, P. M.	In chronic Trypanosoma cruzi infection, the cause of Chagas disease, life-threatening inflammatory diseases develop over time in the heart, esophagus, and colon of some patients. C57BL/6 mice infected with the myotropic Colombiana strain of T. cruzi model many of the immunological and parasitological features of human infection but succumb to chronic paralyzing myositis and skeletal muscle vascul…	2019	Jun	Infection & Immunity	87	6		30936158	https://dx.doi.org/10.1128/IAI.00081-19	Weaver 2019
Lower urinary tract dysfunction in chronic Chagas disease: Clinical and urodynamic presentation in 148 patients	Bey, E.; Paucara, B.; Gaget, O.; Solano, P.; Breniere, S.	Introduction & Objectives: Chagas disease is one of the most neglected vector-borne infectious disease worldwide despite an estimated 8 million cases, among whom only 1% have access to treatment. The international research effort has been mainly concentrated on the typical cardiac and digestive forms, ignoring the involvement of the lower urinary tract. The aim of this study was to assess the pre…	2018	March	European Urology, Supplements	17 (2)		e1368	621479286		Bey 2018
Lower urinary tract dysfunction in chronic Chagas disease: clinical and urodynamic presentation	Bey, E.; Paucara Condori, M. B.; Gaget, O.; Solano, P.; Revollo, S.; Saussine, C.; Breniere, S. F.	PURPOSE: To describe and give an estimation of the prevalence of urinary disorders in chronic Chagas disease, since most clinical research has been centered on the description of the cardiac and digestive forms._x000D_METHODS: To explore this topic, a cross-sectional study was conducted in 137 Bolivian adults of both sexes suffering from symptomatic chronic Chagas disease. All patients presenting…	2019	Jul	World Journal of Urology	37	7	1395-1402	30302592	https://dx.doi.org/10.1007/s00345-018-2512-3	Bey 2019
Lower Urinary Tract Dysfunction in Chronic Chagas' Disease : Clinical and Urodynamic Presentation	NCT03189056; Institut de Recherche pour le, Developpement; Instituto de InvestigaciÃ³n Hospital Universitario La Paz Yes, False	Inclusion Criteria: - Male or female between 18 and 50 years of age - Presenting a chronic form of Chagas disease : cardiopathy or enteropathy - Previously treated or not treated - Signed informed consent Exclusion Criteria: - Diabetes - Neurologic pathology - Past history of extensive pelvic surgery - Vaginal prolaps &gt; grade 3 of Baden &amp; Walker (female) - Past history of vertebral fractur…	2017								NCT03189056 2017
Longer Concentric Action Increases Muscle Activation and Neuromuscular Fatigue Responses in Protocols Equalized by Repetition Duration	Lacerda, L. T.; Costa, C. G.; Lima, F. V.; Martins-Costa, H. C.; Diniz, R. C. R.; Andrade, A. G. P.; Peixoto, G. H. C.; Bemben, M. G.; Chagas, M. H.	Lacerda, LT, Costa, CG, Lima, FV, Martins-Costa, HC, Diniz, RCR, Andrade, AGP, Peixoto, GHC, Bemben, MG, and Chagas, MH. Longer concentric action increases muscle activation and neuromuscular fatigue responses in protocols equalized by repetition duration. J Strength Cond Res 33(6): 1629-1639, 2019-The aim of this study was to investigate the impact of protocols equalized by the repetition durati…	2019	Jun	Journal of Strength & Conditioning Research	33	6	1629-1639	28737588	https://dx.doi.org/10.1519/JSC.0000000000002148	Lacerda 2019
The long way to defeating Chagas cardiomyopathy	Petretta, M.; Cuocolo, A.		2018	2021-02-21	Journal of Nuclear Cardiology			2021-04-01	620795762	http://dx.doi.org/10.1007/s12350-018-1238-3	Petretta 2018
The long road towards a safe and effective treatment of chronic Chagas disease	Urbina, J. A.		2018	4	The Lancet Infectious Diseases	18	4	363-365	29352705	https://dx.doi.org/10.1016/S1473-3099(17)30535-2	Urbina 2018
Localization and phosphorylation of Plasmodium falciparum nicotinamide/nicotinate mononucleotide adenylyltransferase (PfNMNAT) in intraerythrocytic stages	Nieto, C. A.; Sanchez, L. M.; Sanchez, D. M.; Diaz, G. J.; Ramirez, M. H.	BACKGROUND: Nicotinamide adenine dinucleotide (NAD+) is an essential molecule in the energy metabolism of living beings, and it has various cellular functions. The main enzyme in the biosynthesis of this nucleotide is nicotinamide/nicotinate mononucleotide adenylyltransferase (NMNAT, EC 2.7.7.1/18) because it is the convergence point for all known biosynthetic pathways. NMNATs have divergences in…	2018	2011-04-01	Malaria Journal	17	1	161	29642910	https://dx.doi.org/10.1186/s12936-018-2307-4	Nieto 2018
Laparoscopic heller myotomy as treatment for achalasia	Omelanczuk, P.; Berducci, M.	Objective: Aim of this stud was to review our experience with laparoscopic Heller Dor Myotomy. Disphagia constitutes the main symptom. Diagnosis is performed by means of esophageal manometry. Materials and Method: Over a period of 15 years, 180 patients were treated with Heller myotomy plus Dor fundoplication laparoscopically. All patients had lost weight, and there was a prevalence of females wi…	2018		Surgical Endoscopy and Other Interventional Techniques	32 (1 Supplement 1)		S255	622360416	http://dx.doi.org/10.1007/s00464-018-6121-4	Omelanczuk 2018
Laparoscopic heller esophagomyotomy with DOR fundoplication. The gold standard technique for chronic achalasia after unsuccessful balloon dilatations	Ayiomamitis, G.; Grivas, P.; Kontopoulou, C.; Kougia, I.; Liarakos, A.; Tzanoudakis, G.; Paschalidis, N.	Background: The esophageal achalasia is a rare surgical entity of 0.5% incidence. Common cause relates to Chagas disease. Other causes are idiopathic destruction of esophageal nerve plexus. Endoscopic techniques like dilatations can be considered as temporary solutions due to high relapse rate and high risk of esophageal rupture. Furthermore dilatations can cause fibrosis of the lower esophageal …	2017	June	Surgical Endoscopy and Other Interventional Techniques	31 (2 Supplement 1)		S245	617073081	http://dx.doi.org/10.1007/s00464-017-5542-9	Ayiomamitis 2017
Lack of protective exosomes to remove AMZ1 archaeal collagenase is associated with heart failure in Chagas' disease	De Lourdes Higuchi, M.; Kawakami, J. T.; Santos, M. H.; Ikegami, R. N.; Reis, M. M.; Ianni, B.; Buck, P.; Bocchi, E.	Introduction: Cardiomyocytes increase secretion of exosomes (exos), microvesicles lower than 100nm diameter, in pathological conditions such as hypoxia, inflammation or injury, being cardioprotective, with regenerative properties. Microbial agents may also release microvesicles, similar to human's ones. Previously we found that electron dense (ED) exos in the serum of heart failure (HF) Chagas' d…	2017		Circulation. Conference: Resuscitation Science Symposium, ReSS	136	Supplement 1		619985724		DeLourdesHiguchi 2017
Lack of evidence of seronegative infection in an endemic area of chagas disease	De Oliveira, L. C.; Lee, T. H.; Ferreira, A. M.; Bierrenbach, A. L.; De Souza-Basqueira, M.; Di Lorenzo Oliveira, C.; Cardoso, C. S.; Moreira, C. H. V.; Oikawa, M. K.; Ribeiro, A. L. P.; Busch, M. P.; Sabino, E. C.	The diagnosis of Chagas disease is based on the detection of Trypanosoma cruzi (T. cruzi)-specific antibodies. Nonetheless, there is concern about the sensitivity of current serological assays due to reports of T. cruzi PCR positivity among seronegative individuals. The aim of this study was to evaluate if T. cruzi seronegative infections occur in endemic areas. We recruited 2,157 individuals tha…	2019		Rev Inst Med Trop Sao Paulo	61 (no pagination)	e11		2001575676	http://dx.doi.org/10.1590/s1678-9946201961011	DeOliveira 2019
A review of Chagas disease in Italy and the study's contribution of Italian researchers	Antinori, S.; Ridolfo, A. L.; Giacomelli, A.; Bonazzetti, C.; Corbellino, M.; Galli, M.	Chagas disease is an emerging infection in Italy as the consequence of the huge immigration from Latin American countries observed during the last ten-fifteen years. However, the interest of Italian researchers on Chagas disease dates back to the '80-90s of the last century with studies conducted in collaboration with Brazilian and Argentinian colleagues by Italian cardiologists and pathologists.…	2019	1930-07-01	Panminerva Medica	30		30	31362479	https://dx.doi.org/10.23736/S0031-0808.19.03723-6	Antinori 2019
[Response capacity and challenges of the Cuban health system against communicable diseasesCapacidade de resposta e desafios do sistema de saude cubano contra doencas transmissiveis]	Corcho, D. V.; Valle, I. R.; Gutierrez, S. B.; Castillo, R. R.; Avila, L. J. P.; Berrio, L. A.; Cabrera, P. L.; Parra, S. P.; Garcia, F. A. D.	This article presents distinctive and essential features in the transformations of the Cuban health system that have allowed the eradication and reduction of the incidence rates of some communicable diseases at levels lower than 0.1 per 100 000 inhabitants. The results obtained are a consequence of the importance given to the prevention and control, as well as to the risks and potential damages, …	2018		Pan American Journal of Public Health	42		e30	31093059	https://dx.doi.org/10.26633/RPSP.2018.30	Corcho 2018
[truncated: 8,946 more rows]

## Sheet: Excl. Full-text
EXCLUDED CITATIONS FROM FORMAL DATABASE SEARCHES AT LEVEL OF TITLE AND ABSTRACT
[truncated: 2,048 more rows]

[truncated: 8 more sheets: Incl. Databases, Incl. OtherSources, Symptomatic intervention, No intervention, Incl. TT_all, TT published, TT Ongoing & abstract, INCLUDED TT STUDIESFOR ANALYSIS]
