# Supplementary material for: The Chagas disease study landscape: A systematic review of clinical and observational antiparasitic treatment studies to assess the potential for establishing an individual participant-level data platform
Source: PLoS Negl Trop Dis. 2021 Aug 16;15(8):e0009697. doi: 10.1371/journal.pntd.0009697 (PMC8428795; doi:10.1371/journal.pntd.0009697)
Supplement: S3 Data — (XLSX) [file pntd.0009697.s005.xlsx]

## Sheet: study meta_data
study	publication_year	study_type	study_design	number_of_cohorts	cohort_locations	randomisation	blinding	follow_up_duration_days	inclusion_of_pregnant_women	inclusion_of_immunocompromised	inclusion_of_malnourished
Abramson 2013	2013	Observational	Cohort-study	1	Chile	Single-arm	Single-arm	730	Excluded	Unknown	Unknown
Albareda 2015	2015	Interventional	non-randomised	1	Unknown	Single-arm	Single-arm	36	Excluded	Unknown	Unknown
Albareda 2018	2018	Interventional	non-randomised	1	Argentina	Multi-arm no randomisation reported	Multi-arm no blinding reported	1825	Excluded	Unknown	Unknown
Aldasoro 2015	2011	Observational	Cohort-study	1	Spain	Single-arm	Single-arm	62	Unknown	Unknown	Unknown
Aldasoro 2018	2018	Interventional	non-randomised	1	Spain	Single-arm	Single-arm	148	Excluded	Excluded	Unknown
Altcheh 2003	2002	Observational	Cohort-study	4	Argentina/Argentina/Argentina/Argentina	Multi-arm no randomisation reported	Multi-arm no blinding reported	4680	Excluded	Unknown	Unknown
Altcheh 2005	2005	Observational	Cohort-study	1	Argentina	Single-arm	Single-arm	4015	Excluded	Unknown	Unknown
Altcheh 2011	2011	Observational	Cohort-study	1	Argentina	Single-arm	Single-arm	1095	Excluded	Excluded	Unknown
Altcheh2014	2014	Interventional	non-randomised	1	Argentina	Single-arm	Single-arm	730	Excluded	Excluded	Unknown
Altclas2005	2005	Interventional	non-randomised	1	Argentina	Single-arm	Single-arm	997	Unknown	Included	Unknown
Alvarez2016	2015	Interventional	non-randomised	1	Argentina	Single-arm	Single-arm	67	Excluded	Unknown	Unknown
Andrade 2013	2013	Interventional	non-randomised	1	Brazil	Single-arm	Single-arm	1460	Unknown	Unknown	Unknown
Andrade 2016	2016	Observational	Cohort-study	1	Brazil	Single-arm	Single-arm	2190	Unknown	Unknown	Unknown
Apt1998	1998	Interventional	RCT	1	Chile	Multi-arm randomisation reported no detailed methods	Multi-arm blinding reported with details who blinded	7300	Unknown	Unknown	Unknown
Bahamonde 2002	2002	Observational	Cohort-study	2	Chile/Chile	Single-arm	Single-arm	730	Unknown	Unknown	Unknown
Balouz 2017	2017	Interventional	non-randomised	3	Argentina/Argentina/Argentina	Multi-arm no randomisation reported	Multi-arm no blinding reported	3516	Excluded	Unknown	Unknown
Barbosa 2016	2016	Observational	Cohort-study	4	Brazil/Brazil/Brazil/Brazil	Single-arm	Single-arm	425	Unknown	Unknown	Unknown
Bertocchi 2013	2013	Observational	Cohort-study	4	Argentina/Argentina/Argentina/Argentina	Multi-arm no randomisation reported	Multi-arm no blinding reported	6643	Unknown	Excluded	Unknown
Bianchi2015	2015	Interventional	Quasi-randomised	1	Columbia	Single-arm	Single-arm	910	Excluded	Unknown	Unknown
Cardoso 2018	2018	Observational	Cohort-study	1	Brazil	Multi-arm no randomisation reported	Multi-arm no blinding reported	730	Excluded	Unknown	Unknown
Chippaux2013	2012	Interventional	RCT	2	Bolivia/Bolivia	Multi-arm randomisation reported with detailed methods	Multi-arm blinding reported with details who blinded	486	Included	Unknown	Unknown
Coronado2006	2006	Interventional	non-randomised	1	Chile	Multi-arm no randomisation reported	Multi-arm no blinding reported	4380	Unknown	Unknown	Unknown
Correia 2017	2017	Interventional	non-randomised	1	Brazil	Single-arm	Single-arm	486	Unknown	Unknown	Unknown
Crespillo-AndÃºjar 2018	2018	Observational	Cohort-study	1	Spain	Multi-arm no randomisation reported	Multi-arm no blinding reported	90	Unknown	Unknown	Unknown
Cutrullis2011	2011	Interventional	non-randomised	1	Argentina	Multi-arm no randomisation reported	Multi-arm no blinding reported	240	Unknown	Unknown	Unknown
Da Silva Marques 2003	2003	Interventional	non-randomised	1	Brazil	Single-arm	Single-arm	730	Unknown	Unknown	Unknown
Das Neves Pinto2009	2008	Interventional	non-randomised	1	Brazil	Single-arm	Single-arm	1460	Unknown	Unknown	Unknown
de Castro2006	2006	Interventional	non-randomised	1	Brazil	Multi-arm no randomisation reported	Multi-arm no blinding reported	730	Unknown	Unknown	Unknown
Egui 2019	2019	Interventional	Cohort-study	1	Spain	Single-arm	Single-arm	1460	Unknown	Unknown	Unknown
Fernandes2009	2009	Interventional	non-randomised	1	Brazil	Single-arm	Single-arm	1095	Unknown	Unknown	Unknown
Fernandez2016	2016	Interventional	non-randomised	1	Argentina	Single-arm	Single-arm	240	Excluded	Unknown	Unknown
Fernandez-Villegas 2011	2011	Interventional	non-randomised	4	Spain/Spain/Spain/Venezuela	Multi-arm no randomisation reported	Multi-arm no blinding reported	730	Unknown	Unknown	Unknown
Fernandez-Villegas2016	2016	Interventional	non-randomised	1	Spain	Single-arm	Single-arm	790	Unknown	Unknown	Unknown
Flevaud 2015	2015	Interventional	non-randomised	1	Bolivia	Single-arm	Single-arm	365	Excluded	Unknown	Unknown
Flores-Chavez2006	2005	Interventional	non-randomised	1	Bolivia	Single-arm	Single-arm	485	Excluded	Unknown	Unknown
Forsyth2016	2016	Interventional	non-randomised	1	United States	Single-arm	Single-arm	449	Unknown	Excluded	Unknown
Francisco-Gonzalez 2017	2017	Observational	Cohort-study	1	Spain	Single-arm	Single-arm	365	Excluded	Unknown	Unknown
Fumado 2014	2014	Observational	Cohort-study	1	Spain	Single-arm	Single-arm	730	Unknown	Unknown	Unknown
Garcia-Bournissen2015	2014	Interventional	non-randomised	2	Argentina/Argentina	Single-arm	Single-arm	210	Excluded	Unknown	Unknown
Gorgolas 2013	2013	Observational	Cohort-study	1	Spain	Multi-arm no randomisation reported	Multi-arm no blinding reported	249	Unknown	Unknown	Unknown
Gray 2018	2018	Observational	Cohort-study	1	United States	Single-arm	Single-arm	1204	Unknown	Unknown	Unknown
Jackson2010	2010	Interventional	non-randomised	1	Switzerland	Single-arm	Single-arm	1095	Excluded	Unknown	Unknown
Lacunza 2015	2015	Interventional	non-randomised	1	Argentina	Multi-arm no randomisation reported	Multi-arm no blinding reported	1890	Excluded	Unknown	Unknown
Lacunza2006	2006	Interventional	non-randomised	1	Argentina	Multi-arm no randomisation reported	Multi-arm no blinding reported	240	Excluded	Excluded	Unknown
Laucella2009	2009	Interventional	RCT	2	Argentina/Argentina	Multi-arm randomisation reported no detailed methods	Multi-arm no blinding reported	4560	Unknown	Unknown	Unknown
Llaguno 2019	2019	Interventional	non-randomised	1	Brazil	Single-arm	Single-arm	1460	Unknown	Unknown	Unknown
Martinez-Perez2016	2016	Interventional	non-randomised	1	Spain	Single-arm	Single-arm	1095	Unknown	Unknown	Unknown
Mateus 2017	2017	Interventional	non-randomised	2	Columbia/Spain	Multi-arm no randomisation reported	Multi-arm no blinding reported	902	Unknown	Unknown	Unknown
Meira 2006	2006	Observational	Cohort-study	1	Unknown	Multi-arm no randomisation reported	Multi-arm no blinding reported	730	Unknown	Unknown	Unknown
Molina2014; CHAGASAZOL	2014	Interventional	RCT	1	Spain	Multi-arm randomisation reported no detailed methods	Multi-arm no blinding reported	280	Excluded	Excluded	Unknown
Molina2015	2015	Observational	Cohort-study	1	Spain	Multi-arm no randomisation reported	Multi-arm no blinding reported	60	Unknown	Unknown	Unknown
Momper 2019	2019	Observational	Cohort-study	2	Argentina/Argentina	Single-arm	Single-arm	-99	Unknown	Unknown	Unknown
MonjeRumi2013	2013	Interventional	non-randomised	2	Argentina/Argentina	Single-arm	Single-arm	1825	Excluded	Unknown	No
Moreira 2015b	2015	Observational	Cohort-study	1	Brazil	Single-arm	Single-arm	60	Unknown	Unknown	Unknown
Morillo2015; BENEFIT trial	2015	Interventional	RCT	5	Brazil/Argentina/Columbia/Bolivia/El Salvador	Multi-arm randomisation reported no detailed methods	Multi-arm blinding reported with details who blinded	-99	Excluded	Unknown	Unknown
Morillo2017_2; STOP-CHAGAS	2017	Interventional	RCT	6	Argentina/Chile/Spain/Columbia/Guatemala/Mexico	Multi-arm randomisation reported with detailed methods	Multi-arm blinding reported with details who blinded	360	Excluded	Excluded	Unknown
Moroni 2019	2019	Interventional	non-randomised	2	Argentina/Argentina	Single-arm	Single-arm	240	Excluded	Unknown	Unknown
Munoz 2006	2006	Observational	Cohort-study	1	Spain	Single-arm	Single-arm	60	Unknown	Excluded	Unknown
Munoz 2019	2019	Interventional	non-randomised	1	Chile	Multi-arm no randomisation reported	Multi-arm no blinding reported	2920	Unknown	Unknown	Unknown
Munoz2013	2013	Interventional	non-randomised	1	Chile	Single-arm	Single-arm	455	Unknown	Unknown	Unknown
Murcia2016	2016	Interventional	non-randomised	1	Spain	Single-arm	Single-arm	2615	Unknown	Unknown	Unknown
Murcia2017	2017	Interventional	non-randomised	3	Spain/Spain/Spain	Multi-arm no randomisation reported	Multi-arm no blinding reported	3585	Included	Unknown	Unknown
Niborski2016	2016	Interventional	non-randomised	1	Argentina	Single-arm	Single-arm	1095	Excluded	Unknown	Unknown
Oliviera 2010	2010	Interventional	non-randomised	1	Brazil	Multi-arm no randomisation reported	Multi-arm no blinding reported	180	Unknown	Unknown	Unknown
Ortiz 2019	2018	Observational	Cohort-study	1	Brazil	Single-arm	Single-arm	615	Unknown	Unknown	Unknown
Perez-Anton 2018	2018	Interventional	non-randomised	2	Spain/Unknown	Single-arm	Single-arm	1460	Unknown	Unknown	Unknown
Perez-Ayala2011	2010	Observational	Cohort-study	1	Spain	Single-arm	Single-arm	3456	Included	Included	Unknown
Perez-Mazliah2013	2012	Interventional	non-randomised	4	Argentina/Argentina/Argentina/Argentina	Multi-arm no randomisation reported	Multi-arm no blinding reported	1947	Excluded	Excluded	Unknown
Pinazo 2010	2010	Observational	Cohort-study	1	Spain	Single-arm	Single-arm	730	Unknown	Unknown	Unknown
Pinazo 2013	2012	Observational	Cohort-study	1	Spain	Single-arm	Single-arm	60	Unknown	Unknown	Unknown
Pinazo2016	2016	Interventional	non-randomised	2	Spain/Spain	Multi-arm no randomisation reported	Multi-arm no blinding reported	1095	Excluded	Excluded	Unknown
Pontes 2010	2009	Observational	Cohort-study	1	Brazil	Single-arm	Single-arm	60	Excluded	Unknown	No
Pupulin 2003	2003	Observational	Cohort-study	1	Brazil	Single-arm	Single-arm	-99	Unknown	Unknown	Unknown
Rassi 2000	2000	Interventional	non-randomised	1	Unknown	Single-arm	Single-arm	608	Unknown	Unknown	Unknown
Rassi 2002	2002	Interventional	non-randomised	1	Unknown	Single-arm	Single-arm	9216	Unknown	Unknown	Unknown
Rassi1999	1999	Interventional	non-randomised	1	Brazil	Multi-arm no randomisation reported	Multi-arm no blinding reported	8486	Unknown	Included	Unknown
Rassi2007	2006	Interventional	RCT	1	Brazil	Multi-arm randomisation reported with detailed methods	Multi-arm blinding reported with details who blinded	730	Excluded	Unknown	No
Ribeiro 2010	2010	Interventional	non-randomised	4	Brazil/Brazil/Brazil/Brazil	Single-arm	Single-arm	240	Unknown	Excluded	Unknown
Robello 2019	2019	Interventional	non-randomised	1	Bolivia	Single-arm	Single-arm	60	Unknown	Unknown	Unknown
Ruiz Lancheros 2018	2018	Interventional	non-randomised	1	Argentina	Single-arm	Single-arm	2246	Excluded	Unknown	Unknown
Salvador2015	2015	Interventional	non-randomised	1	Spain	Single-arm	Single-arm	60	Excluded	Excluded	Unknown
Sanchez 2016	2016	Interventional	non-randomised	1	Argentina	Single-arm	Single-arm	120	Unknown	Unknown	Unknown
Sanchez Negrette2008	2007	Interventional	non-randomised	1	Argentina	Single-arm	Single-arm	2040	Unknown	Unknown	Unknown
Sartor2017	2017	Interventional	non-randomised	1	Argentina	Single-arm	Single-arm	180	Excluded	Excluded	Unknown
Sartori 2007	2007	Observational	Cohort-study	1	Brazil	Single-arm	Single-arm	5780	Included	Included	Unknown
Schijman2003	2003	Interventional	non-randomised	1	Argentina	Multi-arm no randomisation reported	Multi-arm no blinding reported	1095	Excluded	Unknown	Unknown
Silveira2000	2000	Interventional	non-randomised	1	Brazil	Multi-arm no randomisation reported	Multi-arm no blinding reported	8395	Excluded	Unknown	Unknown
Simon 2019	2019	Observational	Diagnostic test accuracy	1	Spain	Single-arm	Single-arm	365	Included	Unknown	Unknown
Solari1998	1998	Interventional	non-randomised	2	Unknown/Unknown	Multi-arm no randomisation reported	Multi-arm no blinding reported	365	Excluded	Unknown	Unknown
Solari2001	2001	Interventional	non-randomised	1	Chile	Single-arm	Single-arm	1155	Excluded	Unknown	Unknown
Sosa Estani 2004	2003	Interventional	RCT	3	Argentina/Argentina/Argentina	Multi-arm randomisation reported with detailed methods	Multi-arm blinding reported with details who blinded	53	Excluded	Unknown	No
SosaEstani1998	1998	Interventional	RCT	1	Argentina	Multi-arm randomisation reported with detailed methods	Multi-arm blinding reported with details who blinded	1460	Excluded	Excluded	No
Soverow 2019	2019	Interventional	non-randomised	1	United States	Multi-arm no randomisation reported	Multi-arm no blinding reported	1590	Unknown	Unknown	Unknown
Soy2015; CINEBENZ	2015	Interventional	non-randomised	1	Spain	Single-arm	Single-arm	56	Excluded	Excluded	Unknown
Sperandio da Silva 2017	2017	Observational	Cohort-study	1	Bolivia	Single-arm	Single-arm	122	Excluded	Unknown	Unknown
Streiger2004	2004	Interventional	non-randomised	1	Argentina	Multi-arm no randomisation reported	Multi-arm blinding reported with details who blinded	8760	Excluded	Unknown	Unknown
Suarez 2005	2005	Observational	Cohort-study	1	Bolivia	Single-arm	Single-arm	365	Excluded	Unknown	Unknown
Tornheim2013	2013	Interventional	Quasi-randomised	1	Bolivia	Multi-arm randomisation reported with detailed methods	Multi-arm no blinding reported	60	Excluded	Unknown	Unknown
Torrico2017	2017	Interventional	RCT	1	Bolivia	Multi-arm randomisation reported with detailed methods	Multi-arm blinding reported with details who blinded	365	Excluded	Excluded	Unknown
Valente 2009	2008	Interventional	non-randomised	4	Brazil/Brazil/Brazil/Brazil	Multi-arm no randomisation reported	Multi-arm no blinding reported	2600	Unknown	Included	Unknown
Vallejo2016	2016	Interventional	RCT	1	Spain	Multi-arm randomisation reported with detailed methods	Multi-arm no blinding reported	545	Excluded	Unknown	Unknown
Velasquez 2019	2019	Interventional	non-randomised	1	Bolivia	Single-arm	Single-arm	365	Excluded	Unknown	Unknown
Venegas 1997	1997	Interventional	non-randomised	2	Chile/Chile	Single-arm	Single-arm	1307	Unknown	Unknown	Unknown
Vera de Bilbao2004	2005	Interventional	non-randomised	1	Paraguay	Single-arm	Single-arm	730	Unknown	Unknown	Unknown
Viotti2006	2006	Interventional	Quasi-randomised	1	Argentina	Multi-arm randomisation reported with detailed methods	Multi-arm blinding reported with details who blinded	5183	Unknown	Excluded	Unknown
Viotti2011	2011	Interventional	non-randomised	1	Argentina	Multi-arm no randomisation reported	Multi-arm no blinding reported	1825	Unknown	Excluded	Unknown
Wendling 2011	2011	Interventional	non-randomised	1	Brazil	Multi-arm no randomisation reported	Multi-arm no blinding reported	1825	Unknown	Unknown	Unknown
Yun2009	2009	Observational	Cohort-study	4	Honduras/Guatemala/Bolivia/Bolivia	Single-arm	Single-arm	1155	Excluded	Excluded	Unknown
Zulantay 1998	1997	Interventional	non-randomised	2	Chile/Chile	Multi-arm no randomisation reported	Multi-arm no blinding reported	335	Unknown	Unknown	Unknown

## Sheet: cohorts_endemicity
study	publication_year	cohort	endemicity
Abramson 2013	2013	Chile	Endemic
Albareda 2015	2015	Unknown	Unknown
Albareda 2018	2018	Argentina	Endemic
Aldasoro 2015	2011	Spain	Non-endemic
Aldasoro 2018	2018	Spain	Non-endemic
Altcheh 2003	2002	Argentina	Endemic
Altcheh 2005	2005	Argentina	Endemic
Altcheh 2011	2011	Argentina	Endemic
Altcheh2014	2014	Argentina	Endemic
Altclas2005	2005	Argentina	Endemic
Alvarez2016	2015	Argentina	Endemic
Andrade 2013	2013	Brazil	Endemic
Andrade 2016	2016	Brazil	Endemic
Apt1998	1998	Chile	Endemic
Bahamonde 2002	2002	Chile	Endemic
Balouz 2017	2017	Argentina	Endemic
Barbosa 2016	2016	Brazil	Endemic
Bertocchi 2013	2013	Argentina	Endemic
Bianchi2015	2015	Columbia	Endemic
Cardoso 2018	2018	Brazil	Endemic
Chippaux2013	2012	Bolivia	Endemic
Coronado2006	2006	Chile	Endemic
Correia 2017	2017	Brazil	Endemic
Crespillo-Andújar 2018	2018	Spain	Non-endemic
Cutrullis2011	2011	Argentina	Endemic
Da Silva Marques 2003	2003	Brazil	Endemic
Das Neves Pinto2009	2008	Brazil	Endemic
de Castro2006	2006	Brazil	Endemic
Egui 2019	2019	Spain	Non-endemic
Fernandes2009	2009	Brazil	Endemic
Fernandez-Villegas 2011	2011	Spain	Non-endemic
Fernandez-Villegas2016	2016	Spain	Non-endemic
Fernandez2016	2016	Argentina	Endemic
Flevaud 2015	2015	Bolivia	Endemic
Flores-Chavez2006	2005	Bolivia	Endemic
Forsyth2016	2016	United States	Non-endemic
Francisco-Gonzalez 2017	2017	Spain	Endemic
Fumado 2014	2014	Spain	Endemic
Garcia-Bournissen2015	2014	Argentina	Endemic
Gorgolas 2013	2013	Spain	Non-endemic
Gray 2018	2018	United States	Non-endemic
Jackson2010	2010	Switzerland	Non-endemic
Lacunza2006	2006	Argentina	Endemic
Lacunza 2015	2015	Argentina	Endemic
Laucella2009	2009	Argentina	Endemic
Llaguno 2019	2019	Brazil	Endemic
Martinez-Perez2016	2016	Spain	Non-endemic
Mateus 2017	2017	Columbia	Endemic
Meira 2006	2006	Unknown	Unknown
Molina2014; CHAGASAZOL	2014	Spain	Non-endemic
Molina2015	2015	Spain	Non-endemic
Momper 2019	2019	Argentina	Endemic
MonjeRumi2013	2013	Argentina	Endemic
Moreira 2015b	2015	Brazil	Endemic
Morillo2015; BENEFIT trial	2015	Brazil	Endemic
Morillo2017_2; STOP-CHAGAS	2017	Argentina	Endemic
Moroni 2019	2019	Argentina	Endemic
Munoz 2006	2006	Spain	Non-endemic
Munoz2013	2013	Chile	Endemic
Munoz 2019	2019	Chile	Endemic
Murcia2016	2016	Spain	Non-endemic
Murcia2017	2017	Spain	Non-endemic
Niborski2016	2016	Argentina	Endemic
Oliviera 2010	2010	Brazil	Endemic
Ortiz 2019	2018	Brazil	Endemic
Perez-Anton 2018	2018	Spain	Non-endemic
Perez-Ayala2011	2010	Spain	Non-endemic
Perez-Mazliah2013	2012	Argentina	Endemic
Pinazo 2010	2010	Spain	Non-endemic
Pinazo 2013	2012	Spain	Non-endemic
Pinazo2016	2016	Spain	Non-endemic
Pontes 2010	2009	Brazil	Endemic
Pupulin 2003	2003	Brazil	Endemic
Rassi1999	1999	Brazil	Endemic
Rassi 2000	2000	Unknown	Unknown
Rassi 2002	2002	Unknown	Unknown
Rassi2007	2006	Brazil	Endemic
Ribeiro 2010	2010	Brazil	Endemic
Robello 2019	2019	Bolivia	Endemic
Ruiz Lancheros 2018	2018	Argentina	Endemic
Salvador2015	2015	Spain	Non-endemic
Sanchez 2016	2016	Argentina	Endemic
Sanchez Negrette2008	2007	Argentina	Endemic
Sartor2017	2017	Argentina	Endemic
Sartori 2007	2007	Brazil	Endemic
Schijman2003	2003	Argentina	Endemic
Silveira2000	2000	Brazil	Endemic
Simon 2019	2019	Spain	Non-endemic
Solari1998	1998	Unknown	Unknown
Solari2001	2001	Chile	Endemic
SosaEstani1998	1998	Argentina	Endemic
Sosa Estani 2004	2003	Argentina	Endemic
Soverow 2019	2019	United States	Non-endemic
Soy2015; CINEBENZ	2015	Spain	Non-endemic
Sperandio da Silva 2017	2017	Bolivia	Endemic
Streiger2004	2004	Argentina	Endemic
Suarez 2005	2005	Bolivia	Endemic
Tornheim2013	2013	Bolivia	Endemic
Torrico2017	2017	Bolivia	Endemic
Valente 2009	2008	Brazil	Endemic
Vallejo2016	2016	Spain	Non-endemic
Velasquez 2019	2019	Bolivia	Endemic
Venegas 1997	1997	Chile	Endemic
Vera de Bilbao2004	2005	Paraguay	Endemic
Viotti2006	2006	Argentina	Endemic
Viotti2011	2011	Argentina	Endemic
Wendling 2011	2011	Brazil	Endemic
Yun2009	2009	Honduras	Endemic
Zulantay 1998	1997	Chile	Endemic
Altcheh 2003	2002	Argentina	Endemic
Bahamonde 2002	2002	Chile	Endemic
Balouz 2017	2017	Argentina	Endemic
Barbosa 2016	2016	Brazil	Endemic
Bertocchi 2013	2013	Argentina	Endemic
Chippaux2013	2012	Bolivia	Endemic
Fernandez-Villegas 2011	2011	Spain	Non-endemic
Garcia-Bournissen2015	2014	Argentina	Endemic
Laucella2009	2009	Argentina	Endemic
Mateus 2017	2017	Spain	Non-endemic
Momper 2019	2019	Argentina	Endemic
MonjeRumi2013	2013	Argentina	Endemic
Morillo2015; BENEFIT trial	2015	Argentina	Endemic
Morillo2017_2; STOP-CHAGAS	2017	Chile	Endemic
Moroni 2019	2019	Argentina	Endemic
Murcia2017	2017	Spain	Non-endemic
Perez-Anton 2018	2018	Unknown	Unknown
Perez-Mazliah2013	2012	Argentina	Endemic
Pinazo2016	2016	Spain	Non-endemic
Ribeiro 2010	2010	Brazil	Endemic
Solari1998	1998	Unknown	Unknown
Sosa Estani 2004	2003	Argentina	Endemic
Valente 2009	2008	Brazil	Endemic
Venegas 1997	1997	Chile	Endemic
Yun2009	2009	Guatemala	Endemic
Zulantay 1998	1997	Chile	Endemic
Altcheh 2003	2002	Argentina	Endemic
Balouz 2017	2017	Argentina	Non-endemic
Barbosa 2016	2016	Brazil	Endemic
Bertocchi 2013	2013	Argentina	Endemic
Fernandez-Villegas 2011	2011	Spain	Non-endemic
Morillo2015; BENEFIT trial	2015	Columbia	Endemic
Morillo2017_2; STOP-CHAGAS	2017	Spain	Non-endemic
Murcia2017	2017	Spain	Non-endemic
Perez-Mazliah2013	2012	Argentina	Endemic
Ribeiro 2010	2010	Brazil	Endemic
Sosa Estani 2004	2003	Argentina	Endemic
Valente 2009	2008	Brazil	Endemic
Yun2009	2009	Bolivia	Endemic
Altcheh 2003	2002	Argentina	Endemic
Barbosa 2016	2016	Brazil	Endemic
Bertocchi 2013	2013	Argentina	Endemic
Fernandez-Villegas 2011	2011	Venezuela	Endemic
Morillo2015; BENEFIT trial	2015	Bolivia	Endemic
Morillo2017_2; STOP-CHAGAS	2017	Columbia	Endemic
Perez-Mazliah2013	2012	Argentina	Endemic
Ribeiro 2010	2010	Brazil	Endemic
Valente 2009	2008	Brazil	Endemic
Yun2009	2009	Bolivia	Endemic
Morillo2015; BENEFIT trial	2015	El Salvador	Endemic
Morillo2017_2; STOP-CHAGAS	2017	Guatemala	Endemic
Morillo2017_2; STOP-CHAGAS	2017	Mexico	Endemic

## Sheet: drug_arm_details
study	n_treated	n_followed_up	regimen_name	is_this_a_combination_therapy	intervention_1_details	intervention_2_details	intervention_3_details
Abramson 2013	148	91	Nifurtimox	No	Nifurtimox (6-10 mg/kg/day for 60 days)
Albareda 2015	21	21	Benznidazole	No	Benznidazole (dose not clear )
Albareda 2018	45	45	Benznidazole	No	Benznidazole (5 mg/kg/day for 60 days)
Albareda 2018	7	7	Nifurtimox	No	Nifurtimox (10 mg/kg/day for 60 days)
Aldasoro 2015	179	179	Benznidazole	No	Benznidazole (5 mg/kg/day for 60 days)
Aldasoro 2018	99	97	Benznidazole	No	Benznidazole (5 mg/kg/day for 56 days)
Altcheh 2003	21	21	Benznidazole	No	Benznidazole (5-8 mg/kg/day for 60 days)
Altcheh 2005	168	86	Nifurtimox	No	Nifurtimox (10-15mg/kg/day for 60 days)
Altcheh 2011	107	91	Benznidazole	No	Benznidazole (5-8 mg/kg/day for 60 days)
Altcheh2014	40	39	Benznidazole	No	Benznidazole (5-8 mg/kg/day for 60 days)
Altclas2005	6	6	Benznidazole	No	Benznidazole (5 mg/kg/day for 28-56 days)
Altclas2005	10	10	Benznidazole + Other	Yes	Allogenic bone marrow transplant	Benznidazole (5 mg/kg/day for 28-56 days)
Alvarez2016	20	17	Benznidazole	No	Benznidazole (5 mg/kg every 5-days over 60 days)
Andrade 2013	13	13	Benznidazole	No	Benznidazole (5 mg/kg/day for 60 days)
Andrade 2016	30	30	Benznidazole	No	Benznidazole (15 mg/kg/day for 60 days)
Apt1998	185	185	Allopurinol	No	Allopurinol
Apt1998	217	155	Itraconazole	No	Itraconazole
Apt1998	165	165	No treatment/Placebo	No	No treatment/Placebo
Bahamonde 2002	13	13	Nifurtimox	No	Nifurtimox (10 mg/kg/day for 60 days)
Balouz 2017			Benznidazole	No	Benznidazole (10-16 mg/kg/day for 60 days)
Balouz 2017			Nifurtimox	No	Nifurtimox (30-45 mg/kg/day for 60 days)
Balouz 2017			Benznidazole	No	Benznidazole (100mg/day for 60 days)
Balouz 2017			No treatment/Placebo	No	No treatment/Placebo
Barbosa 2016	41	41	Benznidazole + Other	Yes	Benznidazole (5 mg/kg/day for 60 days)	Vitamins E and C
Bertocchi 2013	82	82	Benznidazole	No	Benznidazole (5 mg/kg/day for 30 days)
Bertocchi 2013	25	25	No treatment/Placebo	No	No treatment/Placebo
Bianchi2015	62	58	Nifurtimox	No	Nifurtimox (8-12 mg/kg/day for 60 days)
Cardoso 2018	493	493	Benznidazole	No	Benznidazole (dose not clear )
Cardoso 2018	1320	1320	No treatment/Placebo	No	No treatment/Placebo
Chippaux2013	63	61	Benznidazole	No	Benznidazole (5 mg/kg/day for 60 days)
Chippaux2013	61	59	Benznidazole	No	Benznidazole (7.5 mg/kg/day for 30 days)
Coronado2006	13	13	Allopurinol	No	Allopurinol
Coronado2006	17	17	Itraconazole	No	Itraconazole
Coronado2006	27	27	No treatment/Placebo	No	No treatment/Placebo
Correia 2017	30		Benznidazole	No	Benznidazole (dose not clear )
Crespillo-AndÃºjar 2018	413	0	No treatment/Placebo	No	No treatment/Placebo
Crespillo-AndÃºjar 2018	461	419	Benznidazole	No	Benznidazole (5 mg/kg/day for 60 days)
Crespillo-AndÃºjar 2018	5	5	Nifurtimox	No	Nifurtimox (dose not clear)
Crespillo-AndÃºjar 2018	53	53	Benznidazole + Nifurtimox	Yes	Benznidazole (5 mg/kg/day for 60 days)	Nifurtimox (8-10 mg/kg/day for 60-90 days)
Cutrullis2011	30	30	Benznidazole	No	Benznidazole (5-8 mg/kg/day for 60 days)
Cutrullis2011	19	19	No treatment/Placebo	No	No treatment/Placebo
Da Silva Marques 2003	48	46	Benznidazole	No	Benznidazole (5-10 mg/kg/day for 60 days)
Das Neves Pinto2009	11	11	Benznidazole	No	Benznidazole (5-7 mg/kg/day for 60-90 days)
de Castro2006	27	20	Benznidazole	No	Benznidazole (5 mg/kg/day for 60 days)
de Castro2006	13	13	No treatment/Placebo	No	No treatment/Placebo
Egui 2019	66	66	Benznidazole	No	Benznidazole (5 mg/kg/day for 60 days)
Fernandes2009	80	80	Benznidazole	No	Benznidazole (10 mg/kg/day for 60 day)
Fernandes2009	50	50	No treatment/Placebo	No	No treatment/Placebo
Fernandez-Villegas 2011	35	35	Benznidazole	No	Benznidazole (5 mg/kg/day for 60 days)
Fernandez-Villegas2016	85	85	Benznidazole	No	Benznidazole (5 mg/kg/day for 60 days)
Fernandez2016	6	6	Benznidazole	No	Benznidazole (2.5-5.50 mg/kg/day for 60 days)
Flevaud 2015	176	111	Benznidazole	No	Benznidazole (5 mg/kg/day for 60 days)
Flores-Chavez2006	35	35	Benznidazole	No	Benznidazole (8 mg/kg/day for 60 days)
Forsyth2016	53	53	Nifurtimox	No	Nifurtimox (8-10 mg/kg for 84 days)
Francisco-Gonzalez 2017	40	35	Benznidazole	No	Benznidazole (8-10 mg/kg/day for 60 days)
Fumado 2014	22	22	Benznidazole	No	Benznidazole (8-10 mg/kg/day for 60 days)
Garcia-Bournissen2015	12	10	Benznidazole	No	Benznidazole (5-8 mg/kg/day for 60 days)
Garcia-Bournissen2015	3	3	Benznidazole	No	Benznidazole (dose not clear )
Gorgolas 2013	22	21	Benznidazole	No	Benznidazole (5 mg/kg/day for 60 days)
Gorgolas 2013	17	17	Benznidazole + Other	Yes	Benznidazole (5 mg/kg/day for 60 days)	Methylprednisolone
Gray 2018	19	19	Benznidazole	No	Benznidazole (5 mg/kg/day for 60 days)
Jackson2010	81	73	Nifurtimox	No	Nifurtimox (10 mg/kg/day for 60 days)
Lacunza2006	18	14	Benznidazole	No	Benznidazole (5 mg/kg/day for 60 days)
Lacunza2006	5	5	No treatment/Placebo	No	No treatment/Placebo
Lacunza 2015	101	57	Benznidazole	No	Benznidazole (5 mg/kg/day for 60 days)
Lacunza 2015	37	37	No treatment/Placebo	No	No treatment/Placebo
Laucella2009	43	43	Benznidazole	No	Benznidazole (5 mg/kg/day for 30 days)
Laucella2009	32	32	No treatment/Placebo	No	No treatment/Placebo
Llaguno 2019	32	32	Benznidazole	No	Benznidazole (5 mg/kg/day for 60 days)
Martinez-Perez2016	149	149	Benznidazole	No	Benznidazole (5 mg/kg/day for 60 days)
Mateus 2017	13	13	Nifurtimox	No	Nifurtimox (8 mg/kg/day for 90 days)
Mateus 2017	15	15	Benznidazole	No	Benznidazole (5 mg/kg/day for 60 days)
Mateus 2017	20	20	No treatment/Placebo	No	No treatment/Placebo
Meira 2006	27	27	Unclear drug name	No	Unclear drug name
Meira 2006	13	13	No treatment/Placebo	No	No treatment/Placebo
Molina2014; CHAGASAZOL	26	17	Benznidazole	No	Benznidazole (300 mg/day for 60 days)
Molina2014; CHAGASAZOL	26	25	Posaconazole	No	Posaconazole
Molina2014; CHAGASAZOL	26	20	Posaconazole	No	Posaconazole
Molina2015	264	264	Benznidazole	No	Benznidazole (5 mg/kg/day for 60 days)
Molina2015	208	208	Benznidazole	No	Benznidazole (5 mg/kg/day for 60 days)
Momper 2019	16	16	Benznidazole	No	Benznidazole (5 mg/kg/day; duration not clear)
MonjeRumi2013	57	45	Benznidazole	No	Benznidazole (5 mg/kg/day for 60 days)
Moreira 2015b	93	79	Benznidazole	No	Benznidazole (5 mg/kg/day for 60 days)
Morillo2015; BENEFIT trial	1431	1431	Benznidazole	No	Benznidazole (5 mg/kg/day for 80 days)
Morillo2015; BENEFIT trial	1423	1423	No treatment/Placebo	No	No treatment/Placebo
Morillo2017_2; STOP-CHAGAS	30	30	Posaconazole	No	Posaconazole
Morillo2017_2; STOP-CHAGAS	30	30	Benznidazole + Other	Yes	Benznidazole (200 mg/day for 60 days)	No treatment/Placebo
Morillo2017_2; STOP-CHAGAS	30	28	Benznidazole + Other	Yes	Benznidazole (200 mg/day for 60 days)	Posaconazole
Morillo2017_2; STOP-CHAGAS	30	30	No treatment/Placebo	No	No treatment/Placebo
Moroni 2019	10	10	Nifurtimox	No	Nifurtimox (8-12 mg/kg/day for 30 days)
Munoz 2006	31	24	Benznidazole	No	Benznidazole (5 mg/kg/day for 60 days)
Munoz2013	21	21	Nifurtimox	No	Nifurtimox (6 mg/kg/day for 60 days)
Munoz 2019	100	100	Nifurtimox	No	Nifurtimox (8 mg/kg/day for 60 days)
Munoz 2019	100	100	No treatment/Placebo	No	No treatment/Placebo
Murcia2016	455	455	Benznidazole	No	Benznidazole (300 mg/day for 60 days)
Murcia2017	36	36	Benznidazole	No	Benznidazole (5-7 mg/kg/day for 60 days)
Murcia2017	150	150	No treatment/Placebo	No	No treatment/Placebo
Murcia2017	16	13	Benznidazole	No	Benznidazole (dose not clear )
Niborski2016	270	270	Benznidazole	No	Benznidazole (5 mg/kg/day for 60 days)
Oliviera 2010	21	21	Benznidazole	No	Benznidazole (10 mg/kg for 60 days)
Oliviera 2010	24	24	No treatment/Placebo	No	No treatment/Placebo
Ortiz 2019	63		Benznidazole	No	Benznidazole (5-7 mg/kg/day for 60 days)
Perez-Anton 2018	38	38	Benznidazole	No	Benznidazole (5 mg/kg/day for 60 days)
Perez-Anton 2018	12	12	No treatment/Placebo	No	No treatment/Placebo
Perez-Ayala2011	195	104	Benznidazole	No	Benznidazole (5 mg/kg/day for 60 days)
Perez-Mazliah2013	15	11	Benznidazole + Other	Yes	Allopurinol	Benznidazole (5 mg/kg/day for 30 days)
Perez-Mazliah2013	17		Unclear drug name	No	Unclear
Perez-Mazliah2013	9		Benznidazole	No	Benznidazole (5 mg/kg/day; duration not clear)
Perez-Mazliah2013	9		Unclear drug name	No	Unclear
Pinazo 2010	105	105	Benznidazole	No	Benznidazole (5 mg/kg/day for 60 days)
Pinazo 2013	54	43	Benznidazole	No	Benznidazole (5 mg/kg/day for 60 days)
Pinazo2016	50	45	Benznidazole	No	Benznidazole (5 mg/kg/day for 60 days)
Pontes 2010	32	24	Benznidazole	No	Benznidazole (5 mg/kg/day for 60 days)
Pupulin 2003	51		Benznidazole	No	Benznidazole (dose not clear )
Rassi1999	12	12	Benznidazole + Other	Yes	Prednisone	Benznidazole (10 mg/kg/day for 60 days)
Rassi1999	6	6	Benznidazole + Other	Yes	Prednisone	Benznidazole (10 mg/kg/day for 60 days)
Rassi 2000	12	12	Other	No	Ticlopidine
Rassi 2002	10	10	Nifurtimox + Other	Yes	Nifurtimox (8-9mg/kg/day for 60 days)	Corticosteroids
Rassi2007	23	17	Allopurinol	No	Allopurinol
Rassi2007	12	10	No treatment/Placebo	No	No treatment/Placebo
Ribeiro 2010	41	41	Benznidazole + Other	Yes	Benznidazole (5 mg/kg/day for 60 days)	Vitamin C	Vitamin E
Robello 2019	20	20	Benznidazole	No	Benznidazole (5 mg/kg/day for 60 days)
Robello 2019	35	35	No treatment/Placebo	No	No treatment/Placebo
Ruiz Lancheros 2018	30	30	Benznidazole	No	Benznidazole (5-8 mg/kg/day for 60 days)
Ruiz Lancheros 2018	30	30	No treatment/Placebo	No	No treatment/Placebo
Salvador2015	53	52	Benznidazole	No	Benznidazole (5 mg/kg/day for 60 days)
Sanchez 2016	34	28	Benznidazole	No	Benznidazole (dose not clear )
Sanchez Negrette2008	18	18	Benznidazole	No	Benznidazole (5 mg/kg/day for 60 days)
Sartor2017	78	58	Benznidazole	No	Benznidazole (5-8 mg/kg/day for 60 days)
Sartori 2007	17	12	Benznidazole	No	Benznidazole (dose not clear )
Schijman2003	40	40	Benznidazole + Nifurtimox	Yes	Benznidazole (5-8 mg/kg/day for 60 days)	Nifurtimox (10-15 mg/kg/day for 60 days)
Silveira2000	10	10	Benznidazole	No	Benznidazole (5-7 mg/kg/day for 60 days)
Silveira2000	2	2	Nifurtimox	No	Nifurtimox (7-8 mg/kg/day for 60-90 days)
Simon 2019	12		Benznidazole	No	Benznidazole (10 mg/kg/day for 60 day)
Solari1998	28	28	Nifurtimox	No	Nifurtimox (7 mg/ kg/day for 60 days)
Solari2001	66	56	Nifurtimox	No	Nifurtimox (7-10 mg/kg for 60 days)
SosaEstani1998	55	44	Benznidazole	No	Benznidazole (5 mg/kg/day for 60 days)
SosaEstani1998	51	44	No treatment/Placebo	No	No treatment/Placebo
Sosa Estani 2004	62	62	Benznidazole + Other	Yes	Thioctic Acid	Benznidazole (5 mg/kg/day for 32 days)
Sosa Estani 2004	66	66	Benznidazole + Other	Yes	Thioctic Acid	Benznidazole (5 mg/kg/day for 32 days)
Sosa Estani 2004	59	59	Benznidazole + Other	Yes	No treatment/Placebo	Benznidazole (5 mg/kg/day for 32 days)
Sosa Estani 2004	62	62	No treatment/Placebo	Yes	No treatment/Placebo	Thioctic acid	Benznidazole (5 mg/kg/day for 32 days)
Soverow 2019	41		Nifurtimox	No	Nifurtimox (8-10 mg/kg/day for 84 days)
Soverow 2019	18		Benznidazole	No	Benznidazole (5 mg/kg/day for 60 days)
Soverow 2019	30	30	No treatment/Placebo	No	No treatment/Placebo
Soy2015; CINEBENZ	51	49	Benznidazole	No	Benznidazole (5 mg/kg/day for 56 days)
Sperandio da Silva 2017	2075	1864	Benznidazole	No	Benznidazole (5-7.5 mg/kg/day for 60 days)
Streiger2004	7	7	Nifurtimox	No	Nifurtimox (12-15 mg/kg/day for 45-60 days)
Streiger2004	64	53	Benznidazole	No	Benznidazole (5 mg/kg/day for 30 days)
Streiger2004	24	14	No treatment/Placebo	No	No treatment/Placebo
Suarez 2005	60	60	Benznidazole	No	Benznidazole (8-10 mg/kg/day for 30 days)
Tornheim2013	162		Benznidazole	No	Benznidazole (5-7 mg/kg/day for 60 days)
Torrico2017	45	45	Other	No	E1224
Torrico2017	46	45	Other	Yes	E1224	No treatment/Placebo
Torrico2017	48	48	Other	Yes	E1224	No treatment/Placebo
Torrico2017	45	44	Benznidazole	No	Benznidazole (5 mg/kg/day for 60 days)
Torrico2017	47	47	No treatment/Placebo	No	No treatment/Placebo
Valente 2009			Benznidazole	No	Benznidazole (5 mg/kg for 60 days)
Valente 2009			Nifurtimox	No	Nifurtimox (8 mg/kg for 45 days)
Vallejo2016	7	3	Benznidazole	No	Benznidazole (5 mg/kg/day for 60 days)
Vallejo2016	7	6	No treatment/Placebo	No	No treatment/Placebo
Velasquez 2019	103	73	Benznidazole	No	Benznidazole (5 mg/kg/day for 60 days)
Venegas 1997	20	20	Itraconazole	No	Itraconazole
Vera de Bilbao2004	20	20	Benznidazole	No	Benznidazole (5-7 mg/kg/day for 60 days)
Viotti2006	283	229	Benznidazole	No	Benznidazole (5 mg/kg/day for 30 days)
Viotti2006	283	226	No treatment/Placebo	No	No treatment/Placebo
Viotti2011	53	53	Benznidazole	No	Benznidazole (5 mg/kg/day for 30 days)
Viotti2011	89	89	No treatment/Placebo	No	No treatment/Placebo
Wendling 2011	28	28	Benznidazole	No	Benznidazole (300 mg/day for 60 days)
Wendling 2011	16	16	No treatment/Placebo	No	No treatment/Placebo
Yun2009	2804		Benznidazole	No	Benznidazole (5-7.5 mg/kg/day for 60 days)
Zulantay 1998	30	30	Allopurinol	No	Allopurinol
Zulantay 1998	30	30	Itraconazole	No	Itraconazole
Zulantay 1998	30	30	No treatment/Placebo	No	No treatment/Placebo

## Sheet: participant_and_patient_sizes
study	total_number_of_PARTICIPANTS_enrolled_in_study_cohorts	total_number_of_PATIENTS_enrolled_in_study_cohorts	total_number_of_PATIENTS_on_whom_arm_wise_details_were_available
Abramson 2013	202	172	148
Albareda 2015	21	21	21
Albareda 2018	87	52	52
Aldasoro 2015	179	179	179
Aldasoro 2018	99	99	99
Altcheh 2003	61	21	21
Altcheh 2005	168	168	168
Altcheh 2011	107	107	107
Altcheh2014	40	40	40
Altclas2005	1328	25	16
Alvarez2016	20	20	20
Andrade 2013	13	13	13
Andrade 2016	30	30	30
Apt1998	404	404	567
Bahamonde 2002	13	13	13
Balouz 2017	78	39	0
Barbosa 2016	41	41	41
Bertocchi 2013	107	107	107
Bianchi2015	62	62	62
Cardoso 2018	1959	1813	1813
Chippaux2013	3703	3703	124
Coronado2006	57	57	57
Correia 2017	30	30	30
Crespillo-AndÃºjar 2018	932	932	932
Cutrullis2011	49	30	49
Da Silva Marques 2003	48	48	48
Das Neves Pinto2009	11	11	11
de Castro2006	60	60	40
Egui 2019	66	66	66
Fernandes2009	130	80	130
Fernandez-Villegas 2011	107	46	35
Fernandez-Villegas2016	85	85	85
Fernandez2016	6	6	6
Flevaud 2015	220	220	176
Flores-Chavez2006	35	35	35
Forsyth2016	53	53	53
Francisco-Gonzalez 2017	40	40	40
Fumado 2014	22	22	22
Garcia-Bournissen2015	24	15	15
Gorgolas 2013	39	39	39
Gray 2018	31	24	19
Jackson2010	81	81	81
Lacunza 2015	138	138	138
Lacunza2006	23	23	23
Laucella2009	75	75	75
Llaguno 2019	32	32	32
Martinez-Perez2016	149	149	149
Mateus 2017	48	48	48
Meira 2006	40	40	40
Molina2014; CHAGASAZOL	78	78	78
Molina2015	472	472	472
Momper 2019	16	16	16
MonjeRumi2013	57	57	57
Moreira 2015b	93	93	93
Morillo2015; BENEFIT trial	2854	2854	2854
Morillo2017_2; STOP-CHAGAS	120	120	120
Moroni 2019	20	20	10
Munoz 2006	31	31	31
Munoz 2019	200	200	200
Munoz2013	21	21	21
Murcia2016	455	455	455
Murcia2017	454	310	202
Niborski2016	270	270	270
Oliviera 2010	45	45	45
Ortiz 2019	63	63	63
Perez-Anton 2018	50	38	50
Perez-Ayala2011	357	357	195
Perez-Mazliah2013	50	41	50
Pinazo 2010	105	105	105
Pinazo 2013	54	54	54
Pinazo2016	198	56	50
Pontes 2010	32	32	32
Pupulin 2003	51	51	51
Rassi 2000	12	12	12
Rassi 2002	10	10	10
Rassi1999	18	18	18
Rassi2007	35	35	35
Ribeiro 2010	41	41	41
Robello 2019	55	20	55
Ruiz Lancheros 2018	60	30	60
Salvador2015	53	53	53
Sanchez 2016	78	34	34
Sanchez Negrette2008	18	18	18
Sartor2017	78	78	78
Sartori 2007	53	53	17
Schijman2003	152	40	40
Silveira2000	12	12	12
Simon 2019	342	173	12
Solari1998	298	28	28
Solari2001	66	66	66
Sosa Estani 2004	249	249	249
SosaEstani1998	106	106	106
Soverow 2019	89	89	89
Soy2015; CINEBENZ	51	51	51
Sperandio da Silva 2017	2075	2075	2075
Streiger2004	95	95	95
Suarez 2005	60	60	60
Tornheim2013	162	162	162
Torrico2017	231	231	231
Valente 2009	26	21	0
Vallejo2016	14	14	14
Velasquez 2019	103	103	103
Venegas 1997	20	20	20
Vera de Bilbao2004	20	20	20
Viotti2006	566	566	566
Viotti2011	142	142	142
Wendling 2011	44	44	44
Yun2009	2804	2804	2804
Zulantay 1998	90	90	90

## Sheet: analysis_data
Study Title or Short Hand Reference	Repeat Instrument	Repeat Instance	Publication date	Number of study cohorts	Cohort 1 - Country	Cohort 1 - GPS coordinates	Cohort 1 - Region	Cohort 1 - Setting (choice=Rural)	Cohort 1 - Setting (choice=Urban)	Cohort 1 - Setting (choice=Semi-urban)	Cohort 1 - Setting (choice=Unknown)	Cohort 1 - Total number of study participants	Cohort 1 - Number of Chagas patients included at study site	Cohort 1 - Number of Chagas patients followed-up	Cohort 2 - Country	Cohort 2 - GPS coordinates	Cohort 2 - Region	Cohort 2 - Setting (choice=Rural)	Cohort 2 - Setting (choice=Urban)	Cohort 2 - Setting (choice=Semi-urban)	Cohort 2 - Setting (choice=Unknown)	Cohort 2 - Total number of study participants	Cohort 2 - Number of Chagas patients included at study site	Cohort 2 - Number of Chagas patients followed-up	Cohort 3 - Country	Cohort 3 - GPS coordinates	Cohort 3 - Region	Cohort 3 - Setting (choice=Rural)	Cohort 3 - Setting (choice=Urban)	Cohort 3 - Setting (choice=Semi-urban)	Cohort 3 - Setting (choice=Unknown)	Cohort 3 - Total number of study participants	Cohort 3 - Number of Chagas patients included at study site	Cohort 3 - Number of Chagas patients followed-up	Cohort 4 - Country	Cohort 4 - GPS coordinates	Cohort 4 - Region	Cohort 4 - Setting (choice=Rural)	Cohort 4 - Setting (choice=Urban)	Cohort 4 - Setting (choice=Semi-urban)	Cohort 4 - Setting (choice=Unknown)	Cohort 4 - Total number of study participants	Cohort 4 - Number of Chagas patients included at study site	Cohort 4 - Number of Chagas patients followed-up	Cohort 4 - Calculations required	Cohort 5 - Country	Cohort 5 - GPS coordinates	Cohort 5 - Region	Cohort 5 - Setting (choice=Rural)
Abramson 2013			2013-11-15	1	Chile	-33.577409, -70.581430	South America	0	0	0	1	202	172	103				0	0	0	0							0	0	0	0							0	0	0	0								0
Abramson 2013	Study Arm	1
Albareda 2015			2015-01-15	1	Unknown	-9		0	0	0	1	21	21	21				0	0	0	0							0	0	0	0							0	0	0	0								0
Albareda 2015	Study Arm	1
Albareda 2018			2018-09-13	1	Argentina	-34.614397, -58.368696; -34.649819, -58.563601	South America	1	1	0	0	87	52	52				0	0	0	0							0	0	0	0							0	0	0	0								0
Albareda 2018	Study Arm	1
Albareda 2018	Study Arm	2
Aldasoro 2015			2011-11-10	1	Spain	41.389544, 2.152284	Southern Europe	0	1	0	0	179	179	179				0	0	0	0							0	0	0	0							0	0	0	0								0
Aldasoro 2015	Study Arm	1
Aldasoro 2018			2018-01-07	1	Spain	41.389471, 2.152347	Southern Europe	0	0	0	1	99	99	97				0	0	0	0							0	0	0	0							0	0	0	0								0
Aldasoro 2018	Study Arm	1
Altcheh 2003			2002-11-17	4	Argentina	-34.594104, -58.411511	South America	0	0	0	1	8	8	8	Argentina	-34.594104, -58.411511	South America	0	0	0	1	13	13	13	Argentina	-34.594104, -58.411511	South America	0	0	0	1	20	0	0	Argentina	-34.594104, -58.411511	South America	0	0	0	1	20	0	0	-1				0
Altcheh 2003	Study Arm	1
Altcheh 2005			2005-01-15	1	Argentina	-34.594086, -58.411457	South America	0	1	0	0	168	168	86				0	0	0	0							0	0	0	0							0	0	0	0								0
Altcheh 2005	Study Arm	1
Altcheh 2011			2011-01-15	1	Argentina	-34.594241, -58.411436	South America	0	1	0	0	107	107	91				0	0	0	0							0	0	0	0							0	0	0	0								0
Altcheh 2011	Study Arm	1
Altcheh2014			2014-05-22	1	Argentina	-34.594090, -58.411441	South America	0	1	0	0	40	40	39				0	0	0	0							0	0	0	0							0	0	0	0								0
Altcheh2014	Study Arm	1
Altclas2005			2005-05-23	1	Argentina	(-34.617874, -58.435927),(-34.533126, -58.533126), (-34.571681, -58.451841)	South America	0	1	0	0	1328	25	25				0	0	0	0							0	0	0	0							0	0	0	0								0
Altclas2005	Study Arm	1
Altclas2005	Study Arm	2
Alvarez2016			2015-11-23	1	Argentina	-34.571741, -58.554551; -34.614339, -58.368804	South America	0	1	0	0	20	20	20				0	0	0	0							0	0	0	0							0	0	0	0								0
Alvarez2016	Study Arm	1
Andrade 2013			2013-01-20	1	Brazil	(-3.749159, -38.551733)	South America	0	1	0	0	13	13	13				0	0	0	0							0	0	0	0							0	0	0	0								0
Andrade 2013	Study Arm	1
Andrade 2016			2016-12-15	1	Brazil	-3.749375, -38.551740	South America	0	0	0	1	30	30	30				0	0	0	0							0	0	0	0							0	0	0	0								0
Andrade 2016	Study Arm	1
Apt1998			1998-07-15	1	Chile	(33 degrees 55'S, 69 degrees 46'W), (29 degrees 02'S, 69 degrees 49'W), (32 degrees 02'S, 70 degrees 00'W)	South America	1	1	0	0	404	404	404				0	0	0	0							0	0	0	0							0	0	0	0								0
Apt1998	Study Arm	1
Apt1998	Study Arm	2
Apt1998	Study Arm	3
Bahamonde 2002			2002-01-15	2	Chile	-22.445482, -68.918032	South America	0	0	0	1	5	5	5	Chile	-22.445482, -68.918032	South America	0	0	0	1	8	8	8				0	0	0	0							0	0	0	0								0
Bahamonde 2002	Study Arm	1
Balouz 2017			2017-10-04	3	Argentina	-34.594262, -58.411430	South America	0	1	0	0	26	26	26	Argentina	-34.594262, -58.411430	South America	0	1	0	0	12	12	12	Argentina	-34.594262, -58.411430	Central America	0	1	0	0	40	1	1				0	0	0	0								0
Balouz 2017	Study Arm	1
Balouz 2017	Study Arm	2
Balouz 2017	Study Arm	3
Balouz 2017	Study Arm	4
Barbosa 2016			2016-12-15	4	Brazil	-22.842243, -43.237656	South America	0	0	0	1	13	13	13	Brazil	-22.842243, -43.237656	South America	0	0	0	1	14	14	14	Brazil	-22.842243, -43.237656	South America	0	0	0	1	8	8	8	Brazil	-22.842243, -43.237656	South America	0	0	0	1	6	6	6	-1				0
Barbosa 2016	Study Arm	1
Bertocchi 2013			2013-04-23	4	Argentina	-34.571763, -58.554540	South America	0	0	0	1	66	66	66	Argentina	-34.571763, -58.554540	South America	0	0	0	1	32	32	32	Argentina	-34.571763, -58.554540	South America	0	0	0	1	8	8	8	Argentina	-34.571763, -58.554540	South America	0	0	0	1	1	1	1	-1				0
Bertocchi 2013	Study Arm	1
Bertocchi 2013	Study Arm	2
Bianchi2015			2015-02-27	1	Columbia	5.7589° N, 71.5724° W	South America	0	1	0	0	62	62	58				0	0	0	0							0	0	0	0							0	0	0	0								0
Bianchi2015	Study Arm	1
Cardoso 2018			2018-11-01	1	Brazil	-23.555135, -46.671805	South America	0	0	0	1	1959	1813	1813				0	0	0	0							0	0	0	0							0	0	0	0								0
Cardoso 2018	Study Arm	1
Cardoso 2018	Study Arm	2
Chippaux2013			2012-09-22	2	Bolivia	17.8146° S, 63.1561° W	South America	0	1	0	0	124	124	120	Bolivia	17.8146° S, 63.1561° W	South America	0	1	0	0	3579	3579	-99				0	0	0	0							0	0	0	0								0
Chippaux2013	Study Arm	1
Chippaux2013	Study Arm	2
Coronado2006			2006-05-22	1	Chile	35.6751° S, 71.5430° W	South America	1	0	0	0	57	57	57				0	0	0	0							0	0	0	0							0	0	0	0								0
Coronado2006	Study Arm	1
Coronado2006	Study Arm	2
Coronado2006	Study Arm	3
Correia 2017			2017-02-07	1	Brazil	3.7418° S, 38.5387° W	South America	1	0	0	0	30	30	-99				0	0	0	0							0	0	0	0							0	0	0	0								0
Correia 2017	Study Arm	1
Crespillo-Andújar 2018			2018-06-12	1	Spain	40.417207, -3.703975	Western Europe	0	0	0	1	932	932	477				0	0	0	0							0	0	0	0							0	0	0	0								0
Crespillo-Andújar 2018	Study Arm	1
Crespillo-Andújar 2018	Study Arm	2
Crespillo-Andújar 2018	Study Arm	3
Crespillo-Andújar 2018	Study Arm	4
Cutrullis2011			2011-10-31	1	Argentina	(-34.594147,-58.411419)	South America	0	1	0	0	49	30	30				0	0	0	0							0	0	0	0							0	0	0	0								0
Cutrullis2011	Study Arm	1
Cutrullis2011	Study Arm	2
Da Silva Marques 2003			2003-12-15	1	Brazil	-29.701271, -53.814038	South America	0	1	0	0	48	48	46				0	0	0	0							0	0	0	0							0	0	0	0								0
Da Silva Marques 2003	Study Arm	1
Das Neves Pinto2009			2008-02-05	1	Brazil	1.4557° S, 48.4902° W	South America	0	1	0	0	11	11	11				0	0	0	0							0	0	0	0							0	0	0	0								0
Das Neves Pinto2009	Study Arm	1
de Castro2006			2006-03-29	1	Brazil	-16.678071, -49.267885	South America	1	0	0	0	60	60	40				0	0	0	0							0	0	0	0							0	0	0	0								0
de Castro2006	Study Arm	1
de Castro2006	Study Arm	2
Egui 2019			2019-07-29	1	Spain	(37.932742, -1.162521), (37.188546, -3.609987)	Western Europe	0	0	0	1	66	66	66				0	0	0	0							0	0	0	0							0	0	0	0								0
Egui 2019	Study Arm	1
Fernandes2009			2009-01-11	1	Brazil	30.0346° S, 51.2177° W	South America	0	1	0	0	130	80	80				0	0	0	0							0	0	0	0							0	0	0	0								0
Fernandes2009	Study Arm	1
Fernandes2009	Study Arm	2
Fernandez-Villegas 2011			2011-07-31	4	Spain	(41.3895° N, 2.1523° E), (37.932780, -1.162060)	Southern Europe	0	1	0	1	46	46	25	Spain	(41.3895° N, 2.1523° E), (37.932780, -1.162060)	Southern Europe	0	0	0	1	22	0	0	Spain	(41.4137° N, 2.1743° E)	Southern Europe	0	0	0	1	15	0	0	Venezuela	10.4928° N, 66.8921° W	South America	0	0	0	1	24	0	0	-1				0
Fernandez-Villegas 2011	Study Arm	1
Fernandez-Villegas2016			2016-12-04	1	Spain	37.932531, -1.162119	Southern Europe	0	1	0	0	85	85	85				0	0	0	0							0	0	0	0							0	0	0	0								0
Fernandez-Villegas2016	Study Arm	1
Fernandez2016			2016-03-15	1	Argentina	-99	South America	0	0	0	1	6	6	6				0	0	0	0							0	0	0	0							0	0	0	0								0
Fernandez2016	Study Arm	1
Flevaud 2015			2015-01-15	1	Bolivia	-18.258479, -64.894095	South America	0	0	0	1	220	220	111				0	0	0	0							0	0	0	0							0	0	0	0								0
Flevaud 2015	Study Arm	1
Flores-Chavez2006			2005-11-30	1	Bolivia	-17.419283, -66.145920	South America	0	1	0	0	35	35	35				0	0	0	0							0	0	0	0							0	0	0	0								0
Flores-Chavez2006	Study Arm	1
Forsyth2016			2016-07-17	1	United States	34.326373, -118.446103	Northern America	0	1	0	0	53	53	53				0	0	0	0							0	0	0	0							0	0	0	0								0
Forsyth2016	Study Arm	1
Francisco-Gonzalez 2017			2017-12-04	1	Spain	40.417078, -3.703705	Southern Europe	0	0	0	1	40	40	35				0	0	0	0							0	0	0	0							0	0	0	0								0
Francisco-Gonzalez 2017	Study Arm	1
Fumado 2014			2014-01-31	1	Spain	41.384264, 2.102131	Southern Europe	0	0	0	1	22	22	22				0	0	0	0							0	0	0	0							0	0	0	0								0
Fumado 2014	Study Arm	1
Garcia-Bournissen2015			2014-10-09	2	Argentina	-34.594227, -58.411425	South America	0	1	0	0	12	12	10	Argentina	-34.594227, -58.411425	South America	0	0	0	1	12	3	3				0	0	0	0							0	0	0	0								0
Garcia-Bournissen2015	Study Arm	1
Garcia-Bournissen2015	Study Arm	2
Gorgolas 2013			2013-04-15	1	Spain	40.439261, -3.718379	Southern Europe	0	0	0	1	39	39	39				0	0	0	0							0	0	0	0							0	0	0	0								0
Gorgolas 2013	Study Arm	1
Gorgolas 2013	Study Arm	2
Gray 2018			2018-12-15	1	United States	(36.7783° N, 119.4179° W,) (40.7128° N, 74.0060° W), (38.9072° N, 77.0369° W), (27.6648° N, 81.5158° W), (40.0583° N, 74.4057° W), (31.9686° N, 99.9018° W), (37.4316° N, 78.6569° W), (34.0489° N, 111.0937° W), (39.0458° N, 76.6413° W), (42.4072° N, 71.3824° W), (46.7296° N, 94.6859° W), (35.7596° N, 79.0193° W), (39.3210° N, 111.0937° W), (43.7844° N, 88.7879° W)	Northern America	0	1	0	0	31	24	24				0	0	0	0							0	0	0	0							0	0	0	0								0
Gray 2018	Study Arm	1
Jackson2010			2010-10-08	1	Switzerland	46.193627, 6.149020	Western Europe	0	0	0	1	81	81	73				0	0	0	0							0	0	0	0							0	0	0	0								0
Jackson2010	Study Arm	1
Lacunza2006			2006-12-26	1	Argentina	Salta Province, Argentina	South America	0	1	0	0	23	23	19				0	0	0	0							0	0	0	0							0	0	0	0								0
Lacunza2006	Study Arm	1
Lacunza2006	Study Arm	2
Lacunza 2015			2015-03-16	1	Argentina	-24.728029, -65.409295	South America	0	1	0	0	138	138	94				0	0	0	0							0	0	0	0							0	0	0	0								0
Lacunza 2015	Study Arm	1
Lacunza 2015	Study Arm	2
Laucella2009			2009-10-30	2	Argentina	-34.571715, -58.554540	South America	0	0	0	1	67	67	67	Argentina	-34.571715, -58.554540	South America	0	1	0	0	8	8	8				0	0	0	0							0	0	0	0								0
Laucella2009	Study Arm	1
Laucella2009	Study Arm	2
Llaguno 2019			2019-07-23	1	Brazil	-19.754757, -47.931229	South America	0	0	0	1	32	32	17				0	0	0	0							0	0	0	0							0	0	0	0								0
Llaguno 2019	Study Arm	1
Martinez-Perez2016			2016-02-02	1	Spain	40.487710, -3.694568	Southern Europe	0	0	0	1	149	149	149				0	0	0	0							0	0	0	0							0	0	0	0								0
Martinez-Perez2016	Study Arm	1
Mateus 2017			2017-03-03	2	Columbia	4.641606, -74.095112; 4.628279, -74.064000	South America	0	0	0	1	38	38	-99	Spain	37.932509, -1.162080	Southern Europe	1	0	0	0	10	10	9				0	0	0	0							0	0	0	0								0
Mateus 2017	Study Arm	1
Mateus 2017	Study Arm	2
Mateus 2017	Study Arm	3
Meira 2006			2006-01-15	1	Unknown	-99		0	0	0	1	40	40	40				0	0	0	0							0	0	0	0							0	0	0	0								0
Meira 2006	Study Arm	1
Meira 2006	Study Arm	2
Molina2014; CHAGASAZOL			2014-05-15	1	Spain	41.405437, 2.136379	Southern Europe	0	0	0	1	78	78	62				0	0	0	0							0	0	0	0							0	0	0	0								0
Molina2014; CHAGASAZOL	Study Arm	1
Molina2014; CHAGASAZOL	Study Arm	2
Molina2014; CHAGASAZOL	Study Arm	3
Molina2015			2015-07-20	1	Spain	41.427912, 2.141873	Southern Europe	0	1	0	0	472	472	472				0	0	0	0							0	0	0	0							0	0	0	0								0
Molina2015	Study Arm	1
Molina2015	Study Arm	2
Momper 2019			2019-07-15	2	Argentina	-26.896022, -65.414174	South America	0	0	0	1	10	10	10	Argentina	-26.896022, -65.414174	South America	0	0	0	1	6	6	6				0	0	0	0							0	0	0	0								0
Momper 2019	Study Arm	1
MonjeRumi2013			2013-07-20	2	Argentina	-36.631250, -64.261130	South America	1	0	0	0	25	25	23	Argentina	-34.64201, -60.471279	South America	1	0	0	0	32	32	22				0	0	0	0							0	0	0	0								0
MonjeRumi2013	Study Arm	1
Moreira 2015b			2015-01-15	1	Brazil	-10.052642, -53.914091	South America	0	0	0	1	93	93	79				0	0	0	0							0	0	0	0							0	0	0	0								0
Moreira 2015b	Study Arm	1
Morillo2015; BENEFIT trial			2015-09-01	5	Brazil	(-21.165801,-47.846050), (-20.426078, -49.978029), (-13.001087, -38.509089), (-22.879138, -43.243542), (-23.250808, -47.852242), (-8.048929, -34.887256), (-16.673680, -49.245441), (-23.584539, -46.651828), (-22.842169, -43.237693), (-19.923965, -43.929431), (-12.969968, -38.503135), (-22.920157, -47.119823), (-20.828250, -49.397463), (-19.754570, -47.931205), (-23.554040, -46.667395), (-25.423803…	South America	0	0	0	1	1358	1358	1358	Argentina	31.5351° S, 68.5386° W, (-24.791502, -65.399179),(-34.614096, -58.368788), ( -34.552642, -58.448899), (-32.938488, -60.665181), ( -34.581112, -58.406919), (-34.696905, -58.577452), (-34.629907, -58.575159), (-28.467926, -62.839422), (-31.740394, -60.523295), (-34.637774, -58.393565), (-34.343330, -58.790538), (-28.470852, -65.777132), (-34.622645, -58.948766), (-27.790282, -64.259029)	South America	0	0	0	1	559	559	559	Columbia	6.5548° N, 73.1341° W, (4.647355, -74.097448),( 4.741842, -74.034622), (4.698413, -74.073248),(4.635654, -74.062279)	South America	0	0	0	1	502	502	502	Bolivia	-21.447560, -65.716554	South America	0	0	0	1	357	357	357	-1	El Salvador	13.700643, -89.206006	Central America	0
Morillo2015; BENEFIT trial	Study Arm	1
Morillo2015; BENEFIT trial	Study Arm	2
Morillo2017_2; STOP-CHAGAS			2017-01-19	6	Argentina		South America	0	0	0	1	93	93	93	Chile		South America	0	1	0	0	11	11	11	Spain		Southern Europe	0	1	0	0	10	10	10	Columbia		South America	0	1	0	0	3	3	3	-1	Guatemala		Central America	0
Morillo2017_2; STOP-CHAGAS	Study Arm	1
Morillo2017_2; STOP-CHAGAS	Study Arm	2
Morillo2017_2; STOP-CHAGAS	Study Arm	3
Morillo2017_2; STOP-CHAGAS	Study Arm	4
Moroni 2019			2019-08-15	2	Argentina	-34.594263, -58.411435	South America	0	0	0	1	10	10	10	Argentina	-34.594263, -58.411435	South America	0	0	0	1	10	10	10				0	0	0	0							0	0	0	0								0
Moroni 2019	Study Arm	1
Munoz 2006			2006-01-15	1	Spain	41.3851° N, 2.1734° E	Southern Europe	0	1	0	0	31	31	24				0	0	0	0							0	0	0	0							0	0	0	0								0
Munoz 2006	Study Arm	1
Munoz2013			2013-07-08	1	Chile	29°02=S and 32°16=S	South America	1	1	0	0	21	21	21				0	0	0	0							0	0	0	0							0	0	0	0								0
Munoz2013	Study Arm	1
Munoz 2019			2019-02-26	1	Chile	-31.375293, -71.077705	South America	1	1	0	0	200	200	200				0	0	0	0							0	0	0	0							0	0	0	0								0
Munoz 2019	Study Arm	1
Munoz 2019	Study Arm	2
Murcia2016			2016-04-08	1	Spain	37°55'57.6"N 1°09'43.4"W	Southern Europe	0	0	0	1	455	455	455				0	0	0	0							0	0	0	0							0	0	0	0								0
Murcia2016	Study Arm	1
Murcia2017			2017-02-14	3	Spain	37.932658, -1.162098	South America	0	0	0	1	144	144	144	Spain	37.932658, -1.162098	South America	0	0	0	1	150	150	150	Spain	37.932658, -1.162098	South America	0	0	0	1	160	16	13				0	0	0	0								0
Murcia2017	Study Arm	1
Murcia2017	Study Arm	2
Murcia2017	Study Arm	3
Niborski2016			2016-06-15	1	Argentina	28.4606° S, 62.8344° W	South America	1	1	0	0	270	270	104				0	0	0	0							0	0	0	0							0	0	0	0								0
Niborski2016	Study Arm	1
Oliviera 2010			2010-05-14	1	Brazil	-19.754878, -47.931167	South America	0	0	0	1	45	45	-99				0	0	0	0							0	0	0	0							0	0	0	0								0
Oliviera 2010	Study Arm	1
Oliviera 2010	Study Arm	2
Ortiz 2019			2018-10-05	1	Brazil	-3.031666, -59.963157	South America	0	0	0	1	63	63	-99				0	0	0	0							0	0	0	0							0	0	0	0								0
Ortiz 2019	Study Arm	1
Perez-Anton 2018			2018-05-11	2	Spain	37.932492, -1.162065	Southern Europe	0	0	0	1	38	38	38	Unknown	-99		0	0	0	1	12	0	0				0	0	0	0							0	0	0	0								0
Perez-Anton 2018	Study Arm	1
Perez-Anton 2018	Study Arm	2
Perez-Ayala2011			2010-11-13	1	Spain	40.487820, -3.694546	Southern Europe	0	1	0	0	357	357	104				0	0	0	0							0	0	0	0							0	0	0	0								0
Perez-Ayala2011	Study Arm	1
Perez-Mazliah2013			2012-10-26	4	Argentina	-34.8913,-58.0073	South America	0	1	0	0	15	15	-99	Argentina	-34.8913,-58.0073	South America	0	1	0	0	9	9	-99	Argentina	-34.8913,-58.0073	South America	0	1	0	0	9	0	0	Argentina	-34.8913,-58.0073	South America	0	1	0	0	17	17	-99	-1				0
Perez-Mazliah2013	Study Arm	1
Perez-Mazliah2013	Study Arm	2
Perez-Mazliah2013	Study Arm	3
Perez-Mazliah2013	Study Arm	4
Pinazo 2010			2010-09-07	1	Spain	41.391452, 2.152593	Southern Europe	0	0	0	1	105	105	89				0	0	0	0							0	0	0	0							0	0	0	0								0
Pinazo 2010	Study Arm	1
Pinazo 2013			2012-10-13	1	Spain	41.389708, 2.152307	Southern Europe	0	0	0	1	54	54	43				0	0	0	0							0	0	0	0							0	0	0	0								0
Pinazo 2013	Study Arm	1
Pinazo2016			2016-01-04	2	Spain	41.3887° N, 2.1510° E	Southern Europe	0	1	0	0	99	56	45	Spain	41.3887° N, 2.1510° E	Southern Europe	0	1	0	0	99	0	0				0	0	0	0							0	0	0	0								0
Pinazo2016	Study Arm	1
Pontes 2010			2009-04-01	1	Brazil	3.7418° S, 38.5387° W	South America	1	1	0	0	32	32	24				0	0	0	0							0	0	0	0							0	0	0	0								0
Pontes 2010	Study Arm	1
Pupulin 2003			2003-08-30	1	Brazil	-23.404479, -51.940668	South America	0	0	0	1	51	51	-99				0	0	0	0							0	0	0	0							0	0	0	0								0
Pupulin 2003	Study Arm	1
Rassi1999			1999-01-15	1	Brazil	16.6869° S, 49.2648° W	South America	0	1	0	0	18	18	18				0	0	0	0							0	0	0	0							0	0	0	0								0
Rassi1999	Study Arm	1
Rassi1999	Study Arm	2
Rassi 2000			2000-03-15	1	Unknown	-99		0	0	0	1	12	12	12				0	0	0	0							0	0	0	0							0	0	0	0								0
Rassi 2000	Study Arm	1
Rassi 2002			2002-11-15	1	Unknown	-99		0	0	0	1	10	10	9				0	0	0	0							0	0	0	0							0	0	0	0								0
Rassi 2002	Study Arm	1
Rassi2007			2006-09-30	1	Brazil	-16.587596, 75380-000	South America	0	0	0	1	35	35	27				0	0	0	0							0	0	0	0							0	0	0	0								0
Rassi2007	Study Arm	1
Rassi2007	Study Arm	2
Ribeiro 2010			2010-07-21	4	Brazil	-15.801474, -47.935146	South America	0	0	0	1	10	10	10	Brazil	-15.801474, -47.935146	South America	0	0	0	1	20	20	20	Brazil	-15.801474, -47.935146	South America	0	0	0	1	7	7	7	Brazil	-15.801474, -47.935146	South America	0	0	0	1	4	4	4	-1				0
Ribeiro 2010	Study Arm	1
Robello 2019			2019-02-26	1	Bolivia	-19.039728, -65.255734	Central America	0	0	0	1	55	20	20				0	0	0	0							0	0	0	0							0	0	0	0								0
Robello 2019	Study Arm	1
Robello 2019	Study Arm	2
Ruiz Lancheros 2018			2018-11-04	1	Argentina	-34.594218, -58.411446	South America	0	0	0	1	60	30	30				0	0	0	0							0	0	0	0							0	0	0	0								0
Ruiz Lancheros 2018	Study Arm	1
Ruiz Lancheros 2018	Study Arm	2
Salvador2015			2015-11-08	1	Spain	41.428243, 2.141862	Southern Europe	0	1	0	0	53	53	52				0	0	0	0							0	0	0	0							0	0	0	0								0
Salvador2015	Study Arm	1
Sanchez 2016			2016-01-15	1	Argentina	27.4257° S, 59.0244° W	South America	1	0	0	0	78	34	28				0	0	0	0							0	0	0	0							0	0	0	0								0
Sanchez 2016	Study Arm	1
Sanchez Negrette2008			2007-05-12	1	Argentina	-99	South America	0	0	0	1	18	18	18				0	0	0	0							0	0	0	0							0	0	0	0								0
Sanchez Negrette2008	Study Arm	1
Sartor2017			2017-02-13	1	Argentina	-26.047462, -59.941576	South America	1	0	0	0	78	78	58				0	0	0	0							0	0	0	0							0	0	0	0								0
Sartor2017	Study Arm	1
Sartori 2007			2007-07-02	1	Brazil	-23.554579, -46.670267	South America	0	1	0	0	53	53	45				0	0	0	0							0	0	0	0							0	0	0	0								0
Sartori 2007	Study Arm	1
Schijman2003			2003-08-13	1	Argentina	-34.594059, -58.411489	South America	0	1	0	0	152	40	40				0	0	0	0							0	0	0	0							0	0	0	0								0
Schijman2003	Study Arm	1
Silveira2000			2000-04-15	1	Brazil	-14.499197, -46.137704	South America	0	0	0	1	12	12	12				0	0	0	0							0	0	0	0							0	0	0	0								0
Silveira2000	Study Arm	1
Silveira2000	Study Arm	2
Simon 2019			2019-08-05	1	Spain	37.932677, -1.162508	Southern Europe	0	0	0	1	342	173	12				0	0	0	0							0	0	0	0							0	0	0	0								0
Simon 2019	Study Arm	1
Solari1998			1998-01-15	2	Unknown	-99		0	0	0	1	28	28	28	Unknown	-99		0	0	0	1	270	0	0				0	0	0	0							0	0	0	0								0
Solari1998	Study Arm	1
Solari2001			2001-09-15	1	Chile	-32.311383, -71.075653	South America	0	1	0	0	66	66	56				0	0	0	0							0	0	0	0							0	0	0	0								0
Solari2001	Study Arm	1
SosaEstani1998			1998-01-15	1	Argentina	-24.782023, -65.422740	South America	1	0	1	0	106	106	88				0	0	0	0							0	0	0	0							0	0	0	0								0
SosaEstani1998	Study Arm	1
SosaEstani1998	Study Arm	2
Sosa Estani 2004			2003-05-23	3	Argentina	-34.658690, -58.724085	South America	0	1	0	0	83	83	83	Argentina	-34.658690, -58.724085	South America	0	0	0	1	85	85	85	Argentina	-34.658690, -58.724085	South America	0	1	0	0	81	81	81				0	0	0	0								0
Sosa Estani 2004	Study Arm	1
Sosa Estani 2004	Study Arm	2
Sosa Estani 2004	Study Arm	3
Sosa Estani 2004	Study Arm	4
Soverow 2019			2019-01-19	1	United States	34.325992, -118.446160	Northern America	0	0	0	1	89	89	89				0	0	0	0							0	0	0	0							0	0	0	0								0
Soverow 2019	Study Arm	1
Soverow 2019	Study Arm	2
Soverow 2019	Study Arm	3
Soy2015; CINEBENZ			2015-05-30	1	Spain	41.388664, 2.151119	Southern Europe	0	0	0	1	51	51	49				0	0	0	0							0	0	0	0							0	0	0	0								0
Soy2015; CINEBENZ	Study Arm	1
Sperandio da Silva 2017			2017-06-22	1	Bolivia	18.1089° S, 64.9087° W, 18.3228° S, 64.6796° W, 18.2052° S, 65.1815° W,	South America	1	1	0	0	2075	2075	1864				0	0	0	0							0	0	0	0							0	0	0	0								0
Sperandio da Silva 2017	Study Arm	1
Streiger2004			2004-08-05	1	Argentina	31.6107° S, 60.6973° W	South America	0	1	0	0	95	95	63				0	0	0	0							0	0	0	0							0	0	0	0								0
Streiger2004	Study Arm	1
Streiger2004	Study Arm	2
Streiger2004	Study Arm	3
Suarez 2005			2005-01-15	1	Bolivia	-17.397147, -66.162844	South America	0	0	0	1	60	60	60				0	0	0	0							0	0	0	0							0	0	0	0								0
Suarez 2005	Study Arm	1
Tornheim2013			2013-09-19	1	Bolivia	-17.547099, -65.845171	South America	1	0	0	0	162	162	162				0	0	0	0							0	0	0	0							0	0	0	0								0
Tornheim2013	Study Arm	1
Torrico2017			2017-01-15	1	Bolivia	17.4140° S, 66.1653° W;21.5178° S, 64.7296° W	South America	0	1	0	0	231	231	229				0	0	0	0							0	0	0	0							0	0	0	0								0
Torrico2017	Study Arm	1
Torrico2017	Study Arm	2
Torrico2017	Study Arm	3
Torrico2017	Study Arm	4
Torrico2017	Study Arm	5
Valente 2009			2008-12-31	4	Brazil	S 0041149, W 0513846.1	South America	0	0	0	1	8	8	8	Brazil	S 0041149, W 0513846.1	South America	0	0	0	1	6	6	6	Brazil	S 0041149, W 0513846.1	South America	0	0	0	1	7	7	7	Brazil	S 0041149, W 0513846.1	South America	0	0	0	1	5	0	0	-1				0
Valente 2009	Study Arm	1
Valente 2009	Study Arm	2
Vallejo2016			2016-09-09	1	Spain	40.487722, -3.694568	Southern Europe	0	0	0	1	14	14	11				0	0	0	0							0	0	0	0							0	0	0	0								0
Vallejo2016	Study Arm	1
Vallejo2016	Study Arm	2
Velasquez 2019			2019-09-25	1	Bolivia	17°30'24.1"S 63°10'01.7"W, -17.6028239,-63.1401007, 17°21'27.3"S 63°24'12.6"W, 17°46'43.5"S 63°11'38.3"W	South America	0	0	0	1	103	103	73				0	0	0	0							0	0	0	0							0	0	0	0								0
Velasquez 2019	Study Arm	1
Venegas 1997			1997-05-15	2	Chile	-26.001412, -70.438364	South America	0	0	0	1	10	10	10	Chile	-26.001412, -70.438364	South America	0	0	0	1	10	10	10				0	0	0	0							0	0	0	0								0
Venegas 1997	Study Arm	1
Vera de Bilbao2004			2005-01-18	1	Paraguay	-23.017435, -58.612264	South America	0	0	0	1	20	20	20				0	0	0	0							0	0	0	0							0	0	0	0								0
Vera de Bilbao2004	Study Arm	1
Viotti2006			2006-05-16	1	Argentina	-34.571697, -58.554519	South America	0	0	0	1	566	566	455				0	0	0	0							0	0	0	0							0	0	0	0								0
Viotti2006	Study Arm	1
Viotti2006	Study Arm	2
Viotti2011			2011-06-09	1	Argentina	-34.668330, -58.721932	South America	0	0	0	1	142	142	142				0	0	0	0							0	0	0	0							0	0	0	0								0
Viotti2011	Study Arm	1
Viotti2011	Study Arm	2
Wendling 2011			2011-05-17	1	Brazil	-19.924103, -43.928008	South America	0	0	0	1	44	44	44				0	0	0	0							0	0	0	0							0	0	0	0								0
Wendling 2011	Study Arm	1
Wendling 2011	Study Arm	2
Yun2009			2009-07-07	4	Honduras	15.3, -87.1	Central America	1	0	0	0	231	231	229	Guatemala	14.6, -89.3	Central America	1	0	0	0	124	124	-99	Bolivia	-21.5, -64.7	South America	1	0	0	0	1409	1409	-99	Bolivia	-19.0, -65.2	South America	0	0	1	0	1040	1040	-99					0
Yun2009	Study Arm	1
Zulantay 1998			1997-11-28	2	Chile	-26.506195, -69.748348	South America	0	0	0	1	45	45	45	Chile	-26.506195, -69.748348	South America	0	0	0	1	45	45	45				0	0	0	0							0	0	0	0								0
Zulantay 1998	Study Arm	1
Zulantay 1998	Study Arm	2
Zulantay 1998	Study Arm	3
[truncated: 84 more columns]

## Sheet: lat_long_15_11_2020
Tag	st_study_title	LAT	LONG
1	Abramson 2013	-33.5774	-70.5814
3	Aldasoro 2015	41.3895	2.15228
4	Altcheh 2003	-34.5941	-58.4115
5	Altcheh 2003	-34.5941	-58.4115
6	Altcheh 2003	-34.5941	-58.4115
7	Altcheh 2003	-34.5941	-58.4115
8	Altcheh 2005	-34.5941	-58.4115
9	Altcheh 2011	-34.5942	-58.4114
10	Altcheh2014	-34.5941	-58.4114
11	Altclas2005	-34.6179	-58.4359
12	Altclas2005	-34.5331	-58.5331
13	Altclas2005	-34.5717	-58.4518
14	Alvarez2016	-34.5717	-58.5546
15	Alvarez2016	-34.6143	-58.3688
16	Andrade 2013	-3.74916	-38.5517
17	Andrade 2016	-3.74938	-38.5517
18	Apt1998	-33.4489	-70.6693
19	Apt1998	-30.5402	-70.812
20	Apt1998	-32.504	-71.0022
21	Bahamonde 2002	-22.4455	-68.918
22	Bahamonde 2002	-22.4455	-68.918
23	Barbosa 2016	-22.8422	-43.2377
24	Barbosa 2016	-22.8422	-43.2377
25	Barbosa 2016	-22.8422	-43.2377
26	Barbosa 2016	-22.8422	-43.2377
27	Bertocchi 2013	-34.5718	-58.5545
28	Bertocchi 2013	-34.5718	-58.5545
29	Bertocchi 2013	-34.5718	-58.5545
30	Bertocchi 2013	-34.5718	-58.5545
31	Bianchi2015	5.7589	-71.5724
32	Chippaux2013	-17.8146	-63.1561
33	Chippaux2013	-17.8146	-63.1561
34	Coronado2006	-35.6751	-71.543
35	Correia 2017	-3.7418	-38.5387
36	Cutrullis2011	-34.5941	-58.4114
37	Da Silva Marques 2003	-29.7013	-53.814
38	Das Neves Pinto2009	-1.4557	-48.4902
39	de Castro2006	-16.6781	-49.2679
40	Fernandes2009	-30.0346	-51.2177
41	Fernandez-Villegas 2011	41.3895	2.1523
42	Fernandez-Villegas 2011	37.9328	-1.16206
46	Fernandez-Villegas2016	37.9325	-1.16212
47	Fernandez2016	-34.6144	-58.3688
48	Flevaud 2015	-18.2585	-64.8941
49	Flores-Chavez2006	-17.4193	-66.1459
50	Forsyth2016	34.3264	-118.446
51	Francisco-Gonzalez 2017	40.4171	-3.7037
52	Fumado 2014	41.3843	2.10213
53	Garcia-Bournissen2015	-34.5942	-58.4114
54	Garcia-Bournissen2015	-34.5942	-58.4114
55	Gorgolas 2013	40.4393	-3.71838
56	Jackson2010	46.1936	6.14902
57	Lacunza2006	-24.7821	-65.4232
58	Lacunza 2015	-24.728	-65.4093
59	Laucella2009	-34.5717	-58.5545
60	Laucella2009	-34.5717	-58.5545
61	Martinez-Perez2016	40.4877	-3.69457
63	Molina2014; CHAGASAZOL	41.4054	2.13638
64	Molina2015	41.4279	2.14187
65	MonjeRumi2013	-36.6313	-64.2611
66	MonjeRumi2013	-34.642	-60.4713
67	Moreira 2015b	-10.0526	-53.9141
68	Morillo2015; BENEFIT trial	-21.1658	-47.846
69	Morillo2015; BENEFIT trial	-20.4261	-49.978
70	Morillo2015; BENEFIT trial	-13.0011	-38.5091
71	Morillo2015; BENEFIT trial	-22.8791	-43.2435
72	Morillo2015; BENEFIT trial	-23.2508	-47.8522
73	Morillo2015; BENEFIT trial	-8.04893	-34.8873
74	Morillo2015; BENEFIT trial	-16.6737	-49.2454
75	Morillo2015; BENEFIT trial	-23.5845	-46.6518
76	Morillo2015; BENEFIT trial	-22.8422	-43.2377
77	Morillo2015; BENEFIT trial	-19.924	-43.9294
78	Morillo2015; BENEFIT trial	-12.97	-38.5031
79	Morillo2015; BENEFIT trial	-22.9202	-47.1198
80	Morillo2015; BENEFIT trial	-20.8283	-49.3975
81	Morillo2015; BENEFIT trial	-19.7546	-47.9312
82	Morillo2015; BENEFIT trial	-23.554	-46.6674
83	Morillo2015; BENEFIT trial	-25.4238	-49.2621
84	Morillo2015; BENEFIT trial	-31.7653	-52.3467
85	Morillo2015; BENEFIT trial	-12.8873	-38.42
86	Morillo2015; BENEFIT trial	-31.5351	-68.5386
87	Morillo2015; BENEFIT trial	-24.7915	-65.3992
88	Morillo2015; BENEFIT trial	-34.6141	-58.3688
89	Morillo2015; BENEFIT trial	-34.5526	-58.4489
90	Morillo2015; BENEFIT trial	-32.9385	-60.6652
91	Morillo2015; BENEFIT trial	-34.5811	-58.4069
92	Morillo2015; BENEFIT trial	-34.6969	-58.5775
93	Morillo2015; BENEFIT trial	-34.6299	-58.5752
94	Morillo2015; BENEFIT trial	-28.4679	-62.8394
95	Morillo2015; BENEFIT trial	-31.7404	-60.5233
96	Morillo2015; BENEFIT trial	-34.6378	-58.3936
97	Morillo2015; BENEFIT trial	-34.3433	-58.7905
98	Morillo2015; BENEFIT trial	-28.4709	-65.7771
99	Morillo2015; BENEFIT trial	-34.6226	-58.9488
100	Morillo2015; BENEFIT trial	-27.7903	-64.259
101	Morillo2015; BENEFIT trial	6.5548	-73.1341
102	Morillo2015; BENEFIT trial	4.64736	-74.0974
103	Morillo2015; BENEFIT trial	4.74184	-74.0346
104	Morillo2015; BENEFIT trial	4.69841	-74.0732
105	Morillo2015; BENEFIT trial	4.63565	-74.0623
106	Morillo2015; BENEFIT trial	-21.4476	-65.7166
107	Morillo2015; BENEFIT trial	13.7006	-89.206
108	Morillo2017_2; STOP-CHAGAS	-27.4715	-58.8343
109	Morillo2017_2; STOP-CHAGAS	-34.6144	-58.3688
110	Morillo2017_2; STOP-CHAGAS	-24.7918	-65.3992
111	Morillo2017_2; STOP-CHAGAS	-32.9529	-60.656
112	Morillo2017_2; STOP-CHAGAS	-33.442	-70.6834
113	Morillo2017_2; STOP-CHAGAS	41.3901	2.15329
114	Morillo2017_2; STOP-CHAGAS	41.4279	2.14187
115	Morillo2017_2; STOP-CHAGAS	7.07273	-73.1102
116	Morillo2017_2; STOP-CHAGAS	4.7417	-74.0347
117	Morillo2017_2; STOP-CHAGAS	4.6274	-74.0689
118	Morillo2017_2; STOP-CHAGAS	14.6032	-90.5153
119	Morillo2017_2; STOP-CHAGAS	14.6032	-90.5596
120	Morillo2017_2; STOP-CHAGAS	14.6037	-90.5193
121	Morillo2017_2; STOP-CHAGAS	19.2905	-99.154
122	Munoz 2006	41.3851	2.1734
123	Munoz2013	-31.8041	-71.0022
124	Murcia2016	37.9327	-1.1621
125	Murcia2017	37.9327	-1.1621
126	Murcia2017	37.9327	-1.1621
127	Murcia2017	37.9327	-1.1621
128	Niborski2016	-28.4606	-62.8344
129	Oliviera 2010	-19.7549	-47.9312
130	Perez-Ayala2011	40.4878	-3.69455
131	Perez-Mazliah2013	-34.8913	-58.0073
132	Perez-Mazliah2013	-34.8913	-58.0073
133	Perez-Mazliah2013	-34.8913	-58.0073
134	Perez-Mazliah2013	-34.8913	-58.0073
135	Pinazo 2010	41.3915	2.15259
136	Pinazo 2013	41.3897	2.15231
137	Pinazo2016	41.3887	2.151
138	Pinazo2016	41.3887	2.151
139	Pontes 2010	-3.7418	-38.5387
140	Pupulin 2003	-23.4045	-51.9407
141	Rassi1999	-16.6869	-49.2648
142	Rassi2007	-16.6629	-49.2809
143	Ribeiro 2010	-15.8015	-47.9351
144	Ribeiro 2010	-15.8015	-47.9351
145	Ribeiro 2010	-15.8015	-47.9351
146	Ribeiro 2010	-15.8015	-47.9351
147	Salvador2015	41.4282	2.14186
148	Sanchez 2016	-27.4257	-59.0244
149	Sanchez Negrette2008	-24.7281	-65.4098
150	Sartor2017	-26.0475	-59.9416
151	Sartori 2007	-23.5546	-46.6703
152	Schijman2003	-34.5941	-58.4115
153	Silveira2000	-14.4992	-46.1377
154	Solari2001	-32.3114	-71.0757
155	SosaEstani1998	-24.782	-65.4227
156	Sosa Estani 2004	-34.6587	-58.7241
157	Sosa Estani 2004	-34.6587	-58.7241
158	Sosa Estani 2004	-34.6587	-58.7241
159	Soy2015; CINEBENZ	41.3887	2.15112
160	Sperandio da Silva 2017	-18.1089	-64.9087
161	Sperandio da Silva 2017	-18.3228	-64.6796
162	Sperandio da Silva 2017	-18.2052	-65.1815
163	Streiger2004	-31.6107	-60.6973
164	Suarez 2005	-17.3971	-66.1628
165	Tornheim2013	-17.5471	-65.8452
166	Torrico2017	-17.3939	-66.1475
167	Torrico2017	-21.5462	-64.723
168	Valente 2009	-0.115838	-51.2863
169	Valente 2009	-0.115838	-51.2863
170	Valente 2009	-0.115838	-51.2863
171	Valente 2009	-0.115838	-51.2863
172	Vallejo2016	40.4877	-3.69457
173	Venegas 1997	-26.0014	-70.4384
174	Venegas 1997	-26.0014	-70.4384
175	Vera de Bilbao2004	-23.0174	-58.6123
176	Viotti2006	-34.5717	-58.5545
177	Viotti2011	-34.6683	-58.7219
178	Wendling 2011	-19.9241	-43.928
179	Yun2009	15.2588	-87.2457
180	Yun2009	14.6926	-89.3507
181	Yun2009	-21.5268	-64.1734
182	Yun2009	-19.0402	-65.2577
183	Zulantay 1998	-26.5062	-69.7483
184	Zulantay 1998	-26.5062	-69.7483
New	Albareda 2015
New	Albareda 2018	-34.6144	-58.3687
New	Albareda 2018	-34.6498	-58.5636
New	Aldasoro 2018	41.3895	2.15235
New	Balouz 2017	-34.5943	-58.4114
New	Balouz 2017	-34.5943	-58.4114
New	Balouz 2017	-34.5943	-58.4114
New	Crespillo-AndÃºjar 2018	40.4172	-3.70397
New	Egui 2019	37.9327	-1.16252
New	Egui 2019	37.1885	-3.60999
New	Llaguno 2019	-19.7548	-47.9312
New	Mateus 2017	4.64161	-74.0951
New	Mateus 2017	4.62828	-74.064
New	Mateus 2017	37.9325	-1.16208
New	Meira 2006
New	Momper 2019	-26.896	-65.4142
New	Momper 2019	-26.896	-65.4142
New	Moroni 2019	-34.5943	-58.4114
New	Moroni 2019	-34.5943	-58.4114
New	Munoz 2019	-31.3753	-71.0777
New	Ortiz 2019	-3.03167	-59.9632
New	Perez-Anton 2018	37.9325	-1.16206
New	Rassi 2000
New	Rassi 2002
New	Robello 2019	-19.0397	-65.2557
New	Ruiz Lancheros 2018	-34.5942	-58.4114
New	Simon 2019	37.9327	-1.16251
New	Solari1998
New	Soverow 2019	34.326	-118.446
New	Velasquez 2019	-17.5067	-63.1672
New	Velasquez 2019	-17.6028	-63.1401
New	Velasquez 2019	-17.3576	-63.4036
New	Velasquez 2019	-17.7787	-63.1939
New	Gray 2018	36.7783	-119.418
New	Gray 2018	36.7783	-74.006
New	Gray 2018	38.9072	-77.0369
New	Gray 2018	27.6648	-81.5158
New	Gray 2018	40.0583	-74.4057
New	Gray 2018	31.9686	-99.9018
New	Gray 2018	37.4316	-78.6569
New	Gray 2018	34.0489	-111.094
New	Gray 2018	39.0458	-76.6413
New	Gray 2018	42.4072	-71.3824
New	Gray 2018	46.7296	-94.6859
New	Gray 2018	35.7596	-79.0193
New	Gray 2018	39.321	-111.094
New	Gray 2018	43.7844	-88.7879

## Sheet: Parasitological outcome measure
Study	Were.parasitaemia.related.outcomes.assessed.at.any.time.of.follow.up.during.the.study.	How.was.the.primary.parasitaemia.response.endpoint.expressed.
de Castro2006	Yes	Change in parasitemia profile, as measured by sequential blood cultures (hemocultures), in treated and untreated Chagas patients.
Albareda 2018	Yes	Change in T-cells response to T. cruzi antigens following treatment
Vallejo2016	Yes	The objective was to compare changes in immune parameters and T. cruzi- specific immune responses as surrogate markers of response to therapy.
Laucella2009	Yes	The changes in T. cruzi-specific T cell and antibody responses, as well as in clinical status, measured over a 3-5-year follow-up period.
Llaguno 2019	Yes	negative hemoculture results for T. cruzi
Valente 2009	Yes	negative parasitology test for T. cruzi
Apt1998	Yes	Criteria for parasitologic cure after treatment were negative results for xenodiagnosis and/or CoML maintained throughout the four-year follow up.
Vera de Bilbao2004	Yes	Negativisation of parasitolgical and xenodiagnostic results
Rassi1999	Yes	Negative or positive Xenodiagnosis after treatment.
Chippaux2013	Yes	absence of parasitaemia at 1 month and 2 months and the decrease in antibody titres suggested that these children were no longer infected with T. cruzi.
Fernandez2016	Yes	Detection of T. cruzi DNA as a marker of treatment failure.
Perez-Anton 2018	Yes	Negative parasitemia by PCR
Pinazo 2010	Yes	RT-PCR negative for T. cruzi 6 months after treatment
Torrico2017	Yes	primary efficacy endpoint as parasitological response at the end of treatment, determined by serial negative qualitative standardised PCR: three negative PCR results, from three samples of 10 mL collected over 7 days at the end of treatment
Gorgolas 2013	Yes	Negative PCR response
Cardoso 2018	Yes	Two replicate TC-PCR assays were performed and results interpreted as positive if both were positive. If only one replicate result was positive, it was considered as inconclusive, and another aliquot of this sample was processed in four replicates. The results were considered positive if at least two of the four additional replicates were positive
Munoz 2019	Yes	seroconversion, negativization of cPCR
Murcia2016	Yes	sustained negative PCR result after follow-up for 7 yrs
Velasquez 2019	Yes	T. cruzi Reactive to BNZ (cPCR(-) qPCR(-)) was defined as DNA absence on cPCR and qPCR in more than 2 sampling points during a 6-12 months period. Non-reactive (cPCR(+) T. cruzi qPCR(+)) was defined as the presence of DNA on cPCR and/or qPCR(+) at any sampling point during a 6-12 months period. Ambiguous (cPCR(-) qPCR(+)) was defined as positive qPCR in 2 sampling points during a 6-12 months peri…
Flevaud 2015	Yes	A positive or negative PCR at baseline (BL) among serology positive patients.
Garcia-Bournissen2015	Yes	Treatment response in lactating mothers and the babies with congenital infection was evaluated by T. cruzi specific real-time PCR performed at diagnosis and the end of treatment.
Simon 2019	Yes	Congenital T. cruzi infection was confirmed either: a) when hemoculture and/or microhematocrit were positive at any age or serology remained positive at 12 months of age (conventional criteria); or b) when children had 2 positive PCR results in two specimens collected at different time points (new criteria).
Morillo2017_2; STOP-CHAGAS	Yes	The primary efficacy outcome was the proportion of subjects with persistent negative RT-PCR by day 180 in all treatment groups
Sanchez Negrette2008	Yes	Negative antibody level post treatment.
Venegas 1997	Yes	Lytic activity of sera ( negative sera for lytic antibodies)
Schijman2003	Yes	Patients were monitored by conventional serology and PCR. The criterion of cure was the negativation of IgG anti-T. cruzi antibodies.
Perez-Ayala2011	Yes	Treatment was considered successful when a disappearance of antibodies using serological tests was observed. Patients with persisting antibodies following treatment were considered to have an as yet undetermined response to treatment (due to the short duration of follow-up in some patients).
Altcheh 2011	Yes	decrease or disappearance of specific T cruzi antibodies and a negative parasitological test (T cruzi-specific polymerase chain reaction and a microhematocrit test).
Rassi2007	Yes	Negative parasitemia by XD or negative seroconversion for T. Cruzi
Suarez 2005	Yes	Negative seroconversion
Da Silva Marques 2003	Yes	The primary endpoint for efficacy was the negative seroconversion measured by indirect hemagglutination, indirect immunofluorescence, and ELISA.
Das Neves Pinto2009	Yes	Infection cure is defined when three sequential serologic tests, using two different methods, give negative results.
MonjeRumi2013	Yes	Seroconversion and detection of T. cruzi DNA by PCR. Negativization by two serological tests at the end of a follow-up period was the criterion for cure.
Altcheh 2003	Yes	negativization of the conventional serology in two successive samples.
Altcheh 2005	Yes	Cure criteria was conventional serology negativization.
Murcia2017	Yes	Patients were considered cured when 2 consecutive serological tests were negative.
Ruiz Lancheros 2018	Yes	Children were considered cured when at least 2 serological tests were negative, as recommended by the World Health Organization (WHO).
Bianchi2015	Yes	Two different serological tests (ELISA and IFAT) and two parasitological tests (blood culture and real-time PCR) were used to assess therapeutic response. Evidence of therapeutic response was defined as serological negativization by two serological tests (ELISA and IFAT).
Fumado 2014	Yes	Serological negativization in post-treatment controls was considered a cure criterion.
Bertocchi 2013	Yes	seronegative conversion of two tests or three previously positive reactions in two series of successive measurements were considered a criterion of parasitological cure
Yun2009	Yes	Seroconversion from positive to negative for T. cruzi infection.
Perez-Mazliah2013	Yes	Negative seroconversion and changes in total and T. cruzi-specific T and B cell responses indicative of a positive response to therapy.
Viotti2011	Yes	Seronegative conversion and decreases in titers specific for T. cruzi were measured by conventional serologic assays and a new multiplex serologic assay.
Gray 2018	Yes	Chaga's disease reactivation. we defined laboratory evidence of CDR as either at least two sequential positive PCR test results with decreasing Ct values (indicating an increased presence of parasite DNA) or the identification of trypomastigotes on microscopic examination of whole blood or buffy coat.
Munoz2013	Yes	number of cases with positive parasitemia(T. cruzi) assessed by kDNA PCR and Sat DNA qPCR assays, using Blood or XD samples after treatment with NF.
Solari1998	Yes	Negativization of PCR or XD
Streiger2004	Yes	negative seroconversion and/or Xenodiagnosis
Zulantay 1998	Yes	Reversion of xenodiagnosis, and negativisation of serology
Rassi 2002	Yes	Negativisation of serology and xenodiagnosis
Silveira2000	Yes	Therapeutic success was determined after the negativization of parasitological (PCR, XD) and serological tests after treatment
Bahamonde 2002	Yes	Negativization of serology and xenodiagnostics
Sanchez 2016	Yes	Negative seroconversion and/or PCR positivity
Molina2014; CHAGASAZOL	Yes	Consistently negative results for T. cruzi DNA on rt-PCR assays over the entire follow-up period. Secondary endpoint: serologic conversion from positive to negative by the end of the follow-up period.
Abramson 2013	Yes	Negativization of serology and PCR following treatment
Balouz 2017	Yes	Chemotherapy was considered successful in every T. cruzi-infected patient, based on a steady decrease in conventional serology values during the follow-up period and, in most cases (24/26 from group 1 and 5/12 from group 2), based also on PCR negativization.
Francisco-Gonzalez 2017	Yes	negativized serology - 2 negative PCR results - 1 negative PCR and 1 negative serology
Sartor2017	Yes	Therapeutic response (i.e., treatment failure) was primarily evaluated through detection of T. cruzi DNA by kPCR and qPCR in the subset of patients who completed the full treatment course and had over 80% of medication adherence. Conventional serodiagnosis was performed as well.
Jackson2010	Yes	Changes in conventional and rapid serological diagnostic tests three years after nifurtimox treatment and detection of circulating T. cruzi by conventional and real-time PCR.
Sartori 2007	Yes	The T. cruzi parasitaemias were classified as 'very high' when parasites were detected by the microscopical examination of blood, 'high' when >20% of the triatomine nymphs fed on the patient's blood were found parasite-positive, and 'low' when 20% of the triatomine nymphs fed on the patient's blood were found parasite positive or when only blood culture gave a positive result.
Pinazo2016	Yes	Early normalisation of hypercoagulability biomakers after antiparasitic treatment.
Flores-Chavez2006	Yes	The outcome of treatment was evaluated by parasitologic (xenodiagnosis and PCR-hybridization studies) and serologic (conventional and antibodies to shed acute-phase antigen [SAPA]) tests.
Morillo2015; BENEFIT trial	Yes	The response to treatment based on PCR assay overall and according to geographic region corresponding to the common prevalent T. cruzi discrete typing units (i.e., genetic subtypes): T. cruzi I in Colombia and El Salvador, T. cruzi II in Brazil, and T. cruzi V and VI in both Argentina and Bolivia.
Moroni 2019	Yes	Treatment response was evaluated by T.cruzi specific real-time Polymerase Chain Reaction (PCR) performed at diagnosis and at the end of treatment.
Lacunza2006	Yes	The efficacy of etiologic treatment in young adults infected by T. cruzi was determined by PCR and conventional serology (IHA, ELISA).
Altcheh2014	Yes	Treatment response was evaluated by T.cruzi specific qPCR at the end of treatment.
Wendling 2011	Yes	Results from flow cytometric analysis were expressed as percentage of fluorescent positive parasites for both FC-ALTA IgG and FC-AFEA-IgG. Data from IIF, IHA ELISA and PaGIA were expressed as percentage of positivity
Altclas2005	Yes	The effectiveness of treatment was determined by abrogation of parasitemia, being negative for Strout method, and/or regression of tissue lesions.
Cutrullis2011	Yes	Blood Levels of Anti-M2R AAbs and circulating levels of IFN-ðœ¸ at the end of follow-up compared to that at the start of treatment.
Rassi 2000	Yes	Changes in levels of antibodies detected in serology test, or negative seroconversion or Negative xenodiagnosis results
Andrade 2013	Yes	Semi-quantitative analyses of the anti-Trypanosoma cruzi immunoglobulin G (IgG) in the serum samples were performed using an enzyme immunoassay (BiomÃ©rieux, Brazil). The results were expressed in optical density (OD) units (minus blank). In the serological follow-up, the titer was considered to be: unchanged when the OD from the last collected sample increased or decreased by less than 1.5-fold …
Alvarez2016	Yes	The comparison of quantitative PCR findings prior to and one week after the end of treatment.
SosaEstani1998	Yes	Significant decrease in titres of antibodies against T. cruzi measured by indirect hemagglutination, indirect immunofluorescence, and ELISA.
Fernandez-Villegas 2011	Yes	Drop in the reactivity of sera from chagasic patients during different clinical phases of the disease against a series of immunodominant antigens, known as KMP11, PFR2, HSP70 and Tgp63.
Martinez-Perez2016	Yes	Temporal variation of DTUs and persistence after parasitological treatment were investigated. During follow-up DTU distribution and associated ELISA and IFAT titres were determined.
Niborski2016	Yes	level of antibodies against three antigens, namely B13, 1F8 and JL7,
Fernandez-Villegas2016	Yes	Evaluation of the levels of reactivity to the immunodominant repetitive epitope FGQAAAGDKPSL (3973 peptide) in chronic chagasic patients before and 9 and 24 months after benznidazole treatment. Additionally, the levels of IL-6 and C-reactive protein were measured in serum samples from patients with cardiomyopathy.
Egui 2019	Yes	reactivity of sera from 66 adults with chronic indeterminate Chagas disease (IND) for a set of four Trypanosoma cruzi antigens (KMP11, PFR2, HSP70 and 3973d31 ) was analyzed before and after benznidazole treatment. The results showed that the reactivity against these antigens decreased at 9, 24 and 48 months after treatment.
Viotti2006	Yes	The primary outcome was disease progression, defined as a change to a more advanced Kuschnir group or death. Secondary outcomes included new abnormalities on electrocardiography and serologic reactivity.
Andrade 2016	Yes	Regarding the serological evolution by ELISA, the patients were classified as: unchanged, when the optical density of the last sample collected increased or decreased <1.5 times in relation to the baseline sample (before treatment); when the optical density increased â‰¥ 1.5 times to the initial analysis; and regressive, when the optical density was reduced â‰¥ 1.5 times at the first analysis, ac…
Lacunza 2015	Yes	Seroconversion of serology and PCR tests
Oliviera 2010	Yes	Change in PCR and blood culture results before and after treatment
Solari2001	Yes	Evaluation of treatment efficacy by conventional serology, xenodiagnosis and PCR.
Coronado2006	Yes	Unknown
Fernandes2009	Yes	Unknown
Meira 2006	Yes	Unknown

## Sheet: ChagasDiseaseStudyLa_DATA_LABEL
Study Title or Short Hand Reference	Repeat Instrument	Repeat Instance	Trial Registry ID	Primary Publication Citation	Publication type	Publication date	Corresponding Author(s) information	Corresponding Author(s) contact	Number of other associated publications for this study	Citation of associated publication 1	Citation of associated publication 2	Citation of associated publication 3	Citation of associated publication 4	Citation of associated publication 5	Citation of associated publication 6	Citation of associated publication 7	Have any data sets related to this study been shared/submitted to IDDO?	What are the IDDO Study ID(s) assigned to the associated dataset?	Details of datasets received	Number of study cohorts	Reason for division of study cohorts (choice=Several countries)	Reason for division of study cohorts (choice=Different participant groups)	Reason for division of study cohorts (choice=Different protocols per group)	Description of study cohort division	Cohort 1 - Country	Cohort 1 - Site location	Cohort 1 - GPS coordinates	Cohort 1 - Region	Cohort 1 - Income	Cohort 1 - Site category (choice=School)	Cohort 1 - Site category (choice=Hospital/health-centre)	Cohort 1 - Site category (choice=Other)	Cohort 1 - Site category (choice=Unknown)	Cohort 1 - Setting (choice=Rural)	Cohort 1 - Setting (choice=Urban)	Cohort 1 - Setting (choice=Semi-urban)	Cohort 1 - Setting (choice=Unknown)	Cohort 1 - Endemicity	Cohort 1 - Total number of study participants	Cohort 1 - Number of Chagas patients included at study site	Cohort 1 - Number of Chagas patients followed-up	Cohort 1 - Calculations required	Cohort 2 - Country	Cohort 2 - Site location	Cohort 2 - GPS coordinates	Cohort 2 - Region	Cohort 2 - Income	Cohort 2 - Site category (choice=School)	Cohort 2 - Site category (choice=Hospital/health-centre)
Abramson 2013			-99	Abramson, R.; Figueroa, P. Therapeutic experience in a Chagas disease center. Revista Medica de Chile 2013;141(11):1427-1433	Full text publication	2013-11-15	Dr. Raúl Abramson Dr. Sótero del Río	Dr. Raúl Abramson Departamento de Cardiología. Complejo Asistencial Dr. Sótero del Río, Concha y Toro 3459, Puente Alto, Chile. E-mail: rabr514@gmail.com	0								Unknown			1	Unchecked	Unchecked	Unchecked		Chile	Dr. Sótero del Río Welfare Complex of the South East Metropolitan Health Service	-33.577409, -70.581430	South America	High	Unchecked	Checked	Unchecked	Unchecked	Unchecked	Unchecked	Unchecked	Checked	Endemic	202	172	103	202 minus 30 didnt receive treatment and 91 plus 12						Unchecked	Unchecked
Abramson 2013	Study Arm	1
Albareda 2015			-9	Albareda, M. C.; De Rissio, A. M.; Fernandez, M.; Serjan, A.; Colley, G.; Alvarez, M. G.; Fichera, L.; Viotti, R.; Tarleton, R. L.; Laucella, S. A. Evaluation of trypanosoma cruzi-specific humoral to T cell responses after therapy with benznidazole in children in the early chronic phase of Chagasdisease. American Journal of Tropical Medicine and Hygiene 2015;93(4 Supplement):556	Conference abstract	2015-01-15	Maria C. Albareda Instituto Nacional de Parasitologia Dr M Fatala Chaben, Buenos Aires,Argentina	Unknown	0								Unknown			1	Unchecked	Unchecked	Unchecked		Unknown	Unknown	-9			Unchecked	Unchecked	Unchecked	Checked	Unchecked	Unchecked	Unchecked	Checked		21	21	21	-1						Unchecked	Unchecked
Albareda 2015	Study Arm	1
Albareda 2018			-99	Albareda, M. C., et al. (2018). "Distinct treatment outcomes of antiparasitic therapy in trypanosoma cruzi-infected children is associated with early changes in Cytokines, Chemokines, and T-Cell Phenotypes." Frontiers in Immunology 9:1958. doi: 10.3389/fimmu.2018.01958	Full text publication	2018-09-13	Susana Laucella Instituto Nacional de Parasitología Dr. M. Fatala Chaben, Buenos Aires, Argentina. Hospital Interzonal General de Agudos Eva Perón, Buenos Aires, Argentina	slaucella@yahoo.com	1	https://www.frontiersin.org/articles/10.3389/fimmu. 2018.01958/full#supplementary-material							Unknown			1	Unchecked	Unchecked	Unchecked		Argentina	Instituto Nacional de Parasitología Dr. Mario Fatala Chaben (Buenos Aires, Argentina); Hospital Eva Perón (Buenos Aires, Argentina)	-34.614397, -58.368696; -34.649819, -58.563601	South America	Upper middle	Checked	Checked	Unchecked	Unchecked	Checked	Checked	Unchecked	Unchecked	Endemic	87	52	52	-1						Unchecked	Unchecked
Albareda 2018	Study Arm	1
Albareda 2018	Study Arm	2
Aldasoro 2015			-99	Aldasoro, E.; Pinazo, M. J.; Oliveira, I.; Munoz, J.; Posada, E.; Requena-Mendez, A.; Serret, N.; Gascon, J. Arthritis and benznidazole: More closely related than we thought. Antimicrobial Agents and Chemotherapy 2015;59(1):727-729	Full text publication	2011-11-10	E Aldasoro or J Gascon ISGlobal, Barcelona Centre for International Health Research (CRESIB), Hospital Clinic, University of Barcelona, Barcelona, Spain.	E. Aldasoro, edel.aldasoro@cresib.cat, or J. Gascon, jgascon@clinic.ub.es.	0								Unknown			1	Unchecked	Unchecked	Unchecked		Spain	Tropical Medicine Unit in the Hospital Clinic of Barcelona.	41.389544, 2.152284	Southern Europe	High	Unchecked	Checked	Unchecked	Unchecked	Unchecked	Checked	Unchecked	Unchecked	Non-endemic	179	179	179	-1						Unchecked	Unchecked
Aldasoro 2015	Study Arm	1
Aldasoro 2018			(EUDRACT 2011-002900-34 and 2012-002645-38,NCT01755403; NCT01755377	Aldasoro, E., et al. (2018). "What to expect and when: Benznidazole toxicity in chronic Chagas' disease treatment." Journal of Antimicrobial Chemotherapy 73(4): 1060-1067.	Full text publication	2018-01-07	E. Aldasoro ISGlobal, Barcelona Institute for Global Health, Carrer Rosello ́ 132, 4-2, 08036 Barcelona, Spain.	Tel: 0034932274135; E-mail: edel.aldasoro@isglobal.org	0								Unknown			1	Unchecked	Unchecked	Unchecked		Spain	International Health Department of the Hospital Clinic of Barcelona	41.389471, 2.152347	Southern Europe	High	Unchecked	Checked	Unchecked	Unchecked	Unchecked	Unchecked	Unchecked	Checked	Non-endemic	99	99	97	-1						Unchecked	Unchecked
Aldasoro 2018	Study Arm	1
Altcheh 2003			-99	Altcheh, J., Corral, R., Biancardi, M.A., Freilij, H., 2003. ANTIBODIES ANTI-F2 / 3 AS A HEALING MARKER IN CHILDREN WITH CONGENITAL INFECTION BY TRYPANOSOMA CRUZ. MEDICINA (Buenos Aires) 63: 37-40	Full text publication	2002-11-17	Dr. Jaime Altcheh, Laboratorio de Parasitología y Chagas, Hospital de Niños R. Gutiérrez, Gallo 1330, 1425, Buenos Aires, Argentina.	jaltcheh@intramed.net.ar	0								Unknown			4	Unchecked	Checked	Unchecked	21 patients with congenital T. cruzi infection.Patients were divided into 2 groups: A) Age <8 months at diagnosis, B) Age >9 months at diagnosis. Control groups included 20 uninfected children born to mothers with Chagas disease and 20 children with other tissue parasitosis (toxoplasmosis, malaria, toxocariasis, leishmaniasis).	Argentina	Laboratory of Parasitology and Chagas of the Children's Hospital Ricardo Gutiérrez	-34.594104, -58.411511	South America	High	Unchecked	Checked	Unchecked	Unchecked	Unchecked	Unchecked	Unchecked	Checked	Endemic	8	8	8	-1	Argentina	Laboratory of Parasitology and Chagas of the Children's Hospital Ricardo Gutiérrez	-34.594104, -58.411511	South America	High	Unchecked	Checked
Altcheh 2003	Study Arm	1
Altcheh 2005			-99	Altcheh, J., Biancardi, M., Lapena, A., Ballering, G., & Freilij, H. (2005). Congenital Chagas disease: experience in the Hospital de Ninos, Ricardo Gutierrez, Buenos Aires, Argentina. Revista da Sociedade Brasileira de Medicina Tropical, 38 Suppl 2, 41-45.	Full text publication	2005-01-15	Hector Freilij, Servicio de Parasitologia y Enfermedad de chagas, Hospital de Ninos R Guitierrez, Gallo 1330 (1425), Buenos Aires, Argentina.	freilij@uolsinectis.com.ar	0								Unknown			1	Unchecked	Unchecked	Unchecked		Argentina	Hospital de Ninos Ricardo Guitierrez, Bueno aires, Argentina.	-34.594086, -58.411457	South America	High	Unchecked	Checked	Unchecked	Unchecked	Unchecked	Checked	Unchecked	Unchecked	Endemic	168	168	86	-1						Unchecked	Unchecked
Altcheh 2005	Study Arm	1
Altcheh 2011			-99	Altcheh, J.; Moscatelli, G.; Moroni, S.; Garcia-Bournissen, F.; Freilij, H. Adverse events after the use of benznidazole in infants and children with Chagas disease. Pediatrics 2011;127(1):e212-e218	Full text publication	2011-01-15	Jamie Altcheh, Servicio de Parasitología y Enfermedad de Chagas, Hospital de Niños R. Gutierrez, Gallo 1330, Buenos Aires 1425, Argentina.	E-mail: jaltcheh@gmail.com	0								No			1	Unchecked	Unchecked	Unchecked		Argentina	Parasitology and Chagas Service at the Children's Hospital "Ricardo Gutierrez" of Buenos Aires	-34.594241, -58.411436	South America	High	Unchecked	Checked	Unchecked	Unchecked	Unchecked	Checked	Unchecked	Unchecked	Endemic	107	107	91	-1						Unchecked	Unchecked
Altcheh 2011	Study Arm	1
Altcheh2014			NCT00699387	Altcheh, J., Moscatelli, G., Mastrantonio, G., Moroni, S., Giglio, N., Marson, M., Ballering, G., Bisio, M., Koren, G. and Garcia-Bournissen, F. (2014). Population Pharmacokinetic Study of Benznidazole in Pediatric Chagas Disease Suggests Efficacy despite Lower Plasma Concentrations than in Adults. PLoS Neglected Tropical Diseases, 8(5), p.e2907. doi: 10.1371/journal.pntd.0002907	Full text publication	2014-05-22	Servicio de Parasitologia y Chagas, Hospital de Ninos Ricardo Gutierrez, Ciudad de Buenos Aires, Argentina	facugb@hotmail.com	3	additional online information: S1: trial protocol S2: STROBE checklist S3: VPC final model, by age group (adults and children)	Marson, M., Altcheh, J., Moscatelli, G., Moroni, S., Garcia-Bournissen, F. and Mastrantonio, G. (2015). Identification of N-benzylacetamide as a major component of human plasmatic metabolic profiling of benznidazole. European Journal of Drug Metabolism and Pharmacokinetics, 40(2), pp.209-217. doi: 10.1007/s13318-014-0195-8	Altcheh, J.; Moscatelli, G.; Moroni, S.; Giglio, N.; Koren, G.; Freilij, H.; Garcia-Bournissen, F. Population pharmacokinetics study of benznidazole in children with Chagas disease. Journal of Population Therapeutics and Clinical Pharmacology 2010;17(1):e225-e226					Unknown			1	Unchecked	Unchecked	Unchecked		Argentina	Parasitology and Chagas Service, Buenos Aires Children's Hospital ''R Gutierrez'', Argentina.	-34.594090, -58.411441	South America	High	Unchecked	Checked	Unchecked	Unchecked	Unchecked	Checked	Unchecked	Unchecked	Endemic	40	40	39	-1						Unchecked	Unchecked
Altcheh2014	Study Arm	1
Altclas2005			-9	Altclas, J., Sinagra, A., Dictar, M., Luna, C., Veron, M., De Rissio, A., Garcia, M., Salgueira, C. and Riarte, A. (2005). Chagas disease in bone marrow transplantation: an approach to preemptive therapy. Bone Marrow Transplantation, 36(2), pp.123-129. doi:10.1038/sj.bmt.1705006	Full text publication	2005-05-23	Dr A Riarte, Clinica, Pathology and Treatment, Instituto Nacional de Parasitologia Dr M Fatala Chaben, Av. Paseo Colon 568, Buenos Aires (1063), Argentina	ariarte@yahoo.com	0								Unknown			1	Unchecked	Unchecked	Unchecked		Argentina	Four health centres in Buenos Aires, Argentina: ICTEM Sanatorio Antartida, Clinica Privada Independencia, Instituto Alexander Flemming and Hospital Britanico.	(-34.617874, -58.435927),(-34.533126, -58.533126), (-34.571681, -58.451841)	South America	High	Unchecked	Checked	Unchecked	Unchecked	Unchecked	Checked	Unchecked	Unchecked	Endemic	1328	25	25	-1						Unchecked	Unchecked
Altclas2005	Study Arm	1
Altclas2005	Study Arm	2
Alvarez2016			-99	Alvarez, M., Hernandez, Y., Bertocchi, G., Fernandez, M., Lococo, B., Ramirez, J., Cura, C., Albizu, C., Schijman, A., Abril, M., Sosa-Estani, S. and Viotti, R. (2016). New Scheme of Intermittent Benznidazole Administration in Patients Chronically Infected with Trypanosoma cruzi: a Pilot Short-Term Follow-Up Study with Adult Patients. Antimicrobial Agents and Chemotherapy, 60(2), pp.833-837. doi:…	Full text publication	2015-11-23	Rodolfo Viotti, Hospital Interzonal General de Agudos Eva Peron, San Martin, Buenos Aires, Argentina	rviotti@arnet.com.ar	0								Unknown			1	Unchecked	Unchecked	Unchecked		Argentina	Eleven patients were treated at the Hospital Interzonal General de Agudos Eva Peron, San Martin, Buenos Aires, Argentina, 9 patients were treated at the National Institute of Parasitology Dr. Mario Fatala Chaben, Buenos Aires, Argentina.	-34.571741, -58.554551; -34.614339, -58.368804	South America	Upper middle	Unchecked	Checked	Unchecked	Unchecked	Unchecked	Checked	Unchecked	Unchecked	Endemic	20	20	20	-1						Unchecked	Unchecked
Alvarez2016	Study Arm	1
Andrade 2013			-99	Andrade, M. C., Oliveira M.F., Nagao-Dias, A. T., Coelho, I. C., Candido Dda, S., Freitas, E. C., . . . Bezerra, F. S. (2013). Clinical and serological evolution in chronic Chagas disease patients in a 4-year pharmacotherapy follow-up: a preliminary study. Revista da Sociedade Brasileira de Medicina Tropical, 46(6), 776-778. Retrieved from http://www.scielo.br/pdf/rsbmt/v46n6/0037-8682-rsbmt-00-0…	Full text publication	2013-01-20	Dr. Fernando Schemelzer Moraes Bezerra. Depto Análises Clínicas e Toxicológicas/FFOE/UFC. R. Capitão Francisco Pedro 1210, 60430-370 Fortaleza,CE, Brasil.	bezerra@ufc.br	0								Unknown			1	Unchecked	Unchecked	Unchecked		Brazil	State of Ceará, Brazil. cardiology outpatient clinic at the Hospital Universitário Walter Cantídio (HUWC), Ceará, Brazil, and in the Chagas Disease Research Laboratory.	(-3.749159, -38.551733)	South America	Upper middle	Unchecked	Checked	Unchecked	Unchecked	Unchecked	Checked	Unchecked	Unchecked	Endemic	13	13	13	-1						Unchecked	Unchecked
Andrade 2013	Study Arm	1
Andrade 2016			-99	Andrade, M. C., Rocha, E. A., Costa, A. C. d., Lima, D. d. A., Silva Filho, J. D. d., Bezerra, F. S. d. M., . . . Oliveira, M. d. F. (2016). Evolução eletrocardiográfica e sorológica de pacientes com doença de Chagas crônica acompanhados por seis anos após o tratamento com benzonidazol. RELAMPA, Rev. Lat.-Am. Marcapasso Arritm, 29(4), f:141-l:149.	Full text publication	2016-12-15	Eduardo Arrais Rocha	Eduardo Arrais Rocha. Av. Padre Antonio Tomás, 3.535 - ap. 1.301 - Fortaleza, CE, Brasil - CEP 60192-120 E-mail: eduardoa@cardiol.br	0								Unknown			1	Unchecked	Unchecked	Unchecked		Brazil	Walter Cantídio University Hospital, Brazil	-3.749375, -38.551740	South America	Upper middle	Unchecked	Checked	Unchecked	Unchecked	Unchecked	Unchecked	Unchecked	Checked	Endemic	30	30	30	-1						Unchecked	Unchecked
Andrade 2016	Study Arm	1
Apt1998			-99	Apt, W., Perez, C., Rodriguez, J., Zulantay, I., Juri, D., Miranda, C., Aguilera, X., Arribada, A., Cortes, P. and Sanchez, G. (1998). Treatment of chronic Chagas' disease with itraconazole and allopurinol. The American Journal of Tropical Medicine and Hygiene, 59(1), pp.133-138. doi: 10.4269/ajtmh.1998.59.133	Full text publication	1998-07-15	Departments of Parasitology, Biochemistry, and Public Health, Faculty of Medicine, University of Chile, Santiago, Chile;	wapt@med.uchile.cl	5	Apt, W., Arribada, A., Zulantay, I., Sanchez, G., Vargas, S. and Rodriguez, J. (2003). Itraconazole or allopurinol in the treatment of chronic American trypanosomiasis: the regression and prevention of electrocardiographic abnormalities during 9 years of follow-up. Annals of Tropical Medicine & Parasitology, 97(1), pp.23-29. doi: 10.1179/000349803125002751	Apt, W., Arribada, A., Zulantay, I., Solari, A., S�nchez, G., Mundaca, K., Coronado, X., Rodr�guez, J., Gil, L. and Osuna, A. (2005). Itraconazole or allopurinol in the treatment of chronic American trypanosomiasis: the results of clinical and parasitological examinations 11 years post-treatment. Annals of Tropical Medicine & Parasitology, 99(8), pp.733-741. doi:10.1179/136485905X75403	Apt, W., Arribada, A., Zulantay, I., Rodriguez, J., Saavedra, M. and Munoz, A. (2013). Treatment of Chagas' disease with itraconazole: electrocardiographic and parasitological conditions after 20 years of follow-up. Journal of Antimicrobial Chemotherapy, 68(9), pp.2164-2169. doi:10.1093/jac/dkt135	Zulantay, A. I.; Arribada, C. A.; Honores, P. P.; Sanchez, P. G.; Solari, I. A.; Ortiz, Z. S.; Osuna, C. A.; Rodriguez, T. J.; Apt, B. W. No association between persistence of the parasite and electrocardiographic evolution in treated patients with Chagas disease Revista Medica de Chile 2005;133(10):1153-1160	Zulantay, I., Honores, P., Solari, A., Apt, W., Ortiz, S., Osuna, A., Rojas, A., López, B., Sánchez, G., 2004. Use of polymerase chain reaction (PCR) and hybridization assays to detect Trypanosoma cruzi in chronic chagasic patients treated with itraconazole or allopurinol. Diagn. Microbiol. Infect. Dis. 48, 253-257. https://doi.org/10.1016/j.diagmicrobio.2003.10.011			Unknown			1	Unchecked	Unchecked	Unchecked		Chile	All the patients lived in three of the 12 administrative regions into which Chile is split: Metropolitana, Valparaiso (V) or Coquimbo (IV). Of the total of 404 patients, 96 patients (23.8%) were from the hypoendemic metropolitan region of Santiago (33 degrees 55'S, 69 degrees 46'W), 168 patients (41.6%) were from the hyperendemic IV region (29 degrees 02'S, 69 degrees 49'W), and 140 (34.6%) were …	(33 degrees 55'S, 69 degrees 46'W), (29 degrees 02'S, 69 degrees 49'W), (32 degrees 02'S, 70 degrees 00'W)	South America	High	Unchecked	Checked	Unchecked	Unchecked	Checked	Checked	Unchecked	Unchecked	Endemic	404	404	404	-99						Unchecked	Unchecked
Apt1998	Study Arm	1
Apt1998	Study Arm	2
Apt1998	Study Arm	3
Bahamonde 2002			-99	Bahamonde, Mar�a In�s; Baeza M, Marcela; Chambel, Carmen; Ram�rez, Carlos; Goycolea, Mario. Prevalencia de la infecci�n transplacentaria por Trypanosoma cruzi en el Hospital de Calama, II Regi�n - Chile. Rev. patol. trop 2002;31(1):87-95	Full text publication	2002-01-15	Myriam Lorca	Myriam Lorca. Las Palmeras 299 Int Quinta Normal Casilla 33052 Correo 33, Santiago.- . Chil e. E-ma il : clorca@machi .med .uchile.cl	0								Unknown			2	Unchecked	Checked	Unchecked	The first participant group was obtained by testing newborn cord blood for T cruzi at a matergnity hospital. The second group were identified through an epidemiological study where houses identified by a case index were visited.	Chile	Hospital Carlos Cisternas de Calamas	-22.445482, -68.918032	South America	High	Unchecked	Checked	Unchecked	Unchecked	Unchecked	Unchecked	Unchecked	Checked	Endemic	5	5	5	-1	Chile	Not reported	-22.445482, -68.918032	South America	High	Unchecked	Unchecked
Bahamonde 2002	Study Arm	1
Balouz 2017			-99	Balouz V, (2017). The trypomastigote small surface antigen from Trypanosoma cruzi improves treatment evaluation and diagnosis in pediatric Chagas disease. J Clin Microbiol 55:3444 -3453. https:// doi.org/10.1128/JCM.01317-17.	Full text publication	2017-10-04	Carlos A. Buscaglia Instituto de Investigaciones Biotecnológicas-Instituto Tecnológico de Chascomús (IIB-INTECh), Universidad Nacional de San Martín (UNSAM) and Consejo Nacional de Investigaciones Científicas y Técnicas (CONICET), Buenos Aires, Argentina.	cbuscaglia89@gmail.com.	1	Supplemental material for this article may be found at https://doi.org/10.1128/JCM .01317-17.							Unknown			3	Unchecked	Checked	Unchecked	Participants were separated into groups by age, and diagnosis of T.Cruzi. Group 1 - T. cruzi infected children Group 2 - T.cruzi infected babies Group 3 - infants born to T.cruzi infected mothers, with negative parasitological results.	Argentina	Servicio de Parasitología-Chagas, Hospital de Niños Dr. Ricardo Gutierrez	-34.594262, -58.411430	South America	Upper middle	Unchecked	Checked	Unchecked	Unchecked	Unchecked	Checked	Unchecked	Unchecked	Endemic	26	26	26	-1	Argentina	Servicio de Parasitología-Chagas, Hospital de Niños Dr. Ricardo Gutierrez	-34.594262, -58.411430	South America	Upper middle	Unchecked	Checked
Balouz 2017	Study Arm	1
Balouz 2017	Study Arm	2
Balouz 2017	Study Arm	3
Balouz 2017	Study Arm	4
Barbosa 2016			-99	Barbosa, J.L., Thiers, C.A., Pereira, B. de B., Frazon, C.M.R., Budni, P., Filho, D.W., Pedrosa, R.C., 2016. Impact of the Use of Benznidazole Followed by Antioxidant Supplementation in the Prevalence of Ventricular Arrhythmias in Patients With Chronic Chagas Disease: Pilot Study. Am. J. Ther. 10.	Full text publication	2016-12-15	Roberto Coury Pedrosa, Universidade Federal do Rio de Janeiro, Rua Rodolpho Paulo Rocco, 255, Cidade Universitária - Ilha do Fundão, Rio de Janeiro, Brazil 21941-913	coury@hucff.ufrj.br	0								Unknown			4	Unchecked	Checked	Unchecked	group IA (normal electrocardiogram and echocardiogram: no heart involvement), group IB (normal electrocardiogram and abnormal echocardiogram:mild heart involvement), group II (abnormal electrocardiogram, without congestive heart failure: moderate heart involvement), and group III (abnormal electrocardiogram and echocardiogram with conges tive heart failure: severe heart involvement).	Brazil	Service of Cardiology, University Hospital Clementino Fraga Filho, Rio de Janeiro, Brazil	-22.842243, -43.237656	South America	Upper middle	Unchecked	Checked	Unchecked	Unchecked	Unchecked	Unchecked	Unchecked	Checked	Endemic	13	13	13	-1	Brazil	Service of Cardiology, University Hospital Clementino Fraga Filho, Rio de Janeiro, Brazil	-22.842243, -43.237656	South America	Upper middle	Unchecked	Checked
Barbosa 2016	Study Arm	1
Bertocchi 2013			-99	Bertocchi, G. L.; Vigliano, C. A.; Lococo, B. G.; Petti, M. A.; Viottib, R. J. Clinical characteristics and outcome of 107 adult patients with chronic Chagas disease and parasitological cure criteria. Transactions of the Royal Society of Tropical Medicine and Hygiene 2013;107(6):372-376	Full text publication	2013-04-23	Graciella L. Bertocchi, Departamento de Cardiologia, Hospital Eva Peron, San Martin, Buenos Aires, Argentina.	Tel: +54 11 47010876; E-mail: gbertocchi@intramed.net	0								Unknown			4	Unchecked	Checked	Checked	Subjects were assigned to one of the four groups of the modified clinical hemodynamic staging (Kuschnir):16 Group 0, positive serology, normal ECG, x-ray and ECHO; Group I, positive serology, abnormal ECG and normal x-ray and ECHO; Group II, positive serology, abnormal ECG and x-ray showing increased cardiothoracic ratio (CTR) or increased left ventricular diastolic diameter and global systolic d…	Argentina	Cardiology Service of Eva Peron Hospital, San Martin, Buenos Aires, Argentina	-34.571763, -58.554540	South America	High	Unchecked	Checked	Unchecked	Unchecked	Unchecked	Unchecked	Unchecked	Checked	Endemic	66	66	66	-1	Argentina	Cardiology Service of Eva Peron Hospital, San Martin, Buenos Aires, Argentina	-34.571763, -58.554540	South America	High	Unchecked	Checked
Bertocchi 2013	Study Arm	1
Bertocchi 2013	Study Arm	2
Bianchi2015			-99	Bianchi, F., Cucunuba, Z., Guhl, F., Gonzalez, N., Freilij, H., Nicholls, R., Ramirez, J., Montilla, M., Florez, A., Rosas, F., Saavedra, V. and Silva, N. (2015). Follow-up of an Asymptomatic Chagas Disease Population of Children after Treatment with Nifurtimox (Lampit) in a Sylvatic Endemic Transmission Area of Colombia. PLOS Neglected Tropical Diseases, 9(2), p.e0003465. doi: 10.1371/journal.pn…	Full text publication	2015-02-27	Felipe Guhl, Centro de Investigaciones en Microbiologia y Parasitologia Tropical, Universidad de los Andes, Bogota D.C., Colombia.	fguhl@uniandes.edu.co	4	supporting information file (online available https://doi.org/10.1371/journal.pntd.0003465.s001)	supporting information file (online available https://doi.org/10.1371/journal.pntd.0003465.s002)	supporting information file (online available https://doi.org/10.1371/journal.pntd.0003465.s003)	supporting information file (online available https://doi.org/10.1371/journal.pntd.0003465.s004)				Unknown			1	Unchecked	Unchecked	Unchecked		Columbia	The trial was conducted in the department of Casanare, Colombia. Patients lived in the municipalities of Nunchia, Yopal, and Mani.	5.7589° N, 71.5724° W	South America	Upper middle	Checked	Unchecked	Unchecked	Unchecked	Unchecked	Checked	Unchecked	Unchecked	Endemic	62	62	58	-99						Unchecked	Unchecked
Bianchi2015	Study Arm	1
Cardoso 2018			NCT02646943	Cardoso, C.S., Ribeiro, A.L.P., Oliveira, C.D.L., Oliveira, L.C., Ferreira, A.M., Bierrenbach, A.L., Silva, J.L.P., Colosimo, E.A., Ferreira, J.E., Lee, T.H. and Busch, M.P., 2018. Beneficial effects of benznidazole in Chagas disease: NIH SaMi-Trop cohort study. PLoS neglected tropical diseases, 12(11), p.e0006814.	Full text publication	2018-11-01	Clareci Silva Cardoso São João School of Medicine, Federal University of del-Rei, DivinoÂ polis, Brazil	clarecicardoso@yahoo.com.br	3	Cardoso, C.S., Sabino, E.C., Oliveira, C.D.L., Oliveira, L.C., Ferreira, A.M., Silva, J.L.P., Antunes, A.P. and Ribeiro, A.L.P., 2016. PM201 Benznidazole Treatment is Associated With Lower Bnp Levels in Chagas Cardiomyopathy Patients. Global Heart, 2(11), p.e104.	Cardoso, C.S., Sabino, E.C., Oliveira, C.D.L., Oliveira, L.C., Ferreira, A.M., Bierrenbach, A.L., Silva, J.L.P., Colosimo, E.A., Cunha-Neto, E. and Ribeiro, A.L.P., 2017. Benznidazole treatment is associated with Trypanosoma cruzi blood PCR negativity and less cardiac lesions in Chagas disease: NIH SaMitrop Study. In European Heart Journal. OXFORD UNIV PRESS.	Zrein, M., Granjon, E., Gueyffier, L., Caillaudeau, J., Liehl, P., Pottel, H., Cardoso, C.S., Oliveira, C.D.L., de Oliveira, L.C., Lee, T.H. and Ferreira, A.M., 2018. A novel antibody surrogate biomarker to monitor parasite persistence in Trypanosoma cruzi-infected patients. PLoS neglected tropical diseases, 12(2), p.e0006226.					Unknown			1	Unchecked	Unchecked	Unchecked		Brazil	São Paulo-Minas Gerais Tropical Medicine Research Center (SaMi-Trop)	-23.555135, -46.671805	South America	Upper middle	Unchecked	Unchecked	Checked	Unchecked	Unchecked	Unchecked	Unchecked	Checked	Endemic	1959	1813	1813	-1						Unchecked	Unchecked
Cardoso 2018	Study Arm	1
Cardoso 2018	Study Arm	2
Chippaux2013			-99	Chippaux, J.P., Salas-Clavijo, A.N., Postigo, J.R., Schneider, D., Santalla, J.A. and Brutus, L. (2013). Evaluation of compliance to congenital Chagas disease treatment: results of a randomised trial in Bolivia. Transactions of the Royal Society of Tropical Medicine and Hygiene, 107(1), pp.1-7. doi: 10.1093/trstmh/trs004	Full text publication	2012-09-22	Jean-Philippe Chippaux, Institut de recherche pour le developpement (IRD), 08 BP 841, Cotonou, Benin.	jean-philippe.chippaux@ird.fr	2	Chippaux, J., Clavijo, A., Santalla, J., Postigo, J., Schneider, D. and Brutus, L. (2010). Antibody drop in newborns congenitally infected byTrypanosoma cruzitreated with benznidazole. Tropical Medicine & International Health. doi:10.1111/j.1365-3156.2009.02431.x	Chippaux, J., Clavijo, A., Postigo, J., Santalla, J., Schneider, D. and Brutus, L. (2011). Optimization of congenital chagas disease treatment with benznidazole. American Journal of Tropical Medicine and Hygiene, 85(6 SUPPL. 1), 258-259.						Unknown			2	Unchecked	Checked	Unchecked	Serological screening was carried out in pregnant women, and parasites were sought in the blood of newborns from seropositive mothers. Infected infants were randomly assigned to two treatment groups.	Bolivia	The clinical trial was carried out in Santa Cruz de la Sierra (800 000 inhabitants), located in the eastern lowlands of Bolivia. Three maternity units were selected: the Percy Boland reference municipal maternity unit; the maternity unit of the national social security fund; and the maternity unit of the French Hospital that opened in 2007.	17.8146° S, 63.1561° W	South America	Lower middle	Unchecked	Checked	Unchecked	Unchecked	Unchecked	Checked	Unchecked	Unchecked	Endemic	124	124	120	-1	Bolivia	The clinical trial was carried out in Santa Cruz de la Sierra (800 000 inhabitants), located in the eastern lowlands of Bolivia. Three maternity units were selected: the Percy Boland reference municipal maternity unit; the maternity unit of the national social security fund; and the maternity unit of the French Hospital that opened in 2007.	17.8146° S, 63.1561° W	South America	Lower middle	Unchecked	Checked
Chippaux2013	Study Arm	1
Chippaux2013	Study Arm	2
Coronado2006			-99	Coronado. X., Zulantay, I., Rozas. M., Apt. W., Sanchez. G., Rodriguez. J., Ortiz. S. and Solari. A. (2006). Dissimilar distribution of Trypanosoma cruzi clones in humans after chemotherapy with allopurinol and itraconazole. Journal of Antimicrobial Chemotherapy, 58(1), pp.216-219. doi:10.1093/jac/dkl192	Full text publication	2006-05-22	Aldo Solari, Programa de Biologia Celular y Molecular, Instituto de Ciencias Biomedicas, Facultad de Medicina, Universidad de Chile, Independencia 1027, Codigo postal 70086, Santiago 7, Chile	asolari@med.uchile.cl	0								Unknown			1	Unchecked	Unchecked	Unchecked		Chile	Chile (no details given)	35.6751° S, 71.5430° W	South America	High	Unchecked	Checked	Unchecked	Unchecked	Checked	Unchecked	Unchecked	Unchecked	Endemic	57	57	57	-1						Unchecked	Unchecked
Coronado2006	Study Arm	1
Coronado2006	Study Arm	2
Coronado2006	Study Arm	3
Correia 2017			-99	Correia. J. P. R., Costa. A. C. D.; Rocha. E. A., Quidute. A. R. P.; Candido. D. D. S.; Ponciano. A. M. S.; Fonteles. M. M. F.; Oliveira. M. F. Pharmacotherapeutic follow-up of patients with Chagas disease using benznidazole: drug-related problems and pharmaceutical interventions. Revista da Sociedade Brasileira de Medicina Tropical 2017;50(3):334-340	Full text publication	2017-02-07	Alanna Carla da Costa. [1]Laboratório de Pesquisa em Doença de Chagas, Departamento de Análises Clínicas, Universidade Federal do Ceará, Fortaleza, CE, Brasil. [2]. Programa de Pós-Graduação Stricto Sensu em Ciências Farmacêuticas, Universidade Federal do Ceará, Fortaleza, CE, Brasil	alannacarla.costa@gmail.com	0								Unknown			1	Unchecked	Unchecked	Unchecked		Brazil	Chagas Disease Research Laboratory (LPDC) of the Federal University of Ceará, Fortaleza, Ceará, Brazil	3.7418° S, 38.5387° W	South America	Upper middle	Checked	Unchecked	Unchecked	Unchecked	Checked	Unchecked	Unchecked	Unchecked	Endemic	30	30	-99							Unchecked	Unchecked
Correia 2017	Study Arm	1
Crespillo-Andújar 2018			-99	Crespillo-Andújar C, Chamorro-Tojeiro S, Norman F, Monge-Maillo B, López-Vélez R, Pérez-Molina JA. Toxicity of nifurtimox as second-line treatment after benznidazole intolerance in patients with chronic Chagas disease: when available options fail. Clin Microbiol Infect. 2018 Dec;24(12):1344.e1-1344.e4. doi: 10.1016/j.cmi.2018.06.006. Epub 2018 Jun 12. PMID: 29906591.	Full text publication	2018-06-12	J. A. Perez-Molina	CSUR de Medicina Tropical, Servicio de Enfermedades Infecciosas, Hospital Universitario Ramon y Cajal, Carretera de Colmenar Km 9,1, Madrid 28030, Spain. E-mail address: jperezm@salud.madrid.org (J.A. Perez-Molina).	0								Unknown			1	Unchecked	Unchecked	Unchecked		Spain	referral centre in Spain	40.417207, -3.703975	Western Europe	High	Unchecked	Checked	Unchecked	Unchecked	Unchecked	Unchecked	Unchecked	Checked	Non-endemic	932	932	477	519-42=477						Unchecked	Unchecked
Crespillo-Andújar 2018	Study Arm	1
Crespillo-Andújar 2018	Study Arm	2
Crespillo-Andújar 2018	Study Arm	3
Crespillo-Andújar 2018	Study Arm	4
Cutrullis2011			-9	Cutrullis. R, A., Moscatelli.G,F., Moroni. S., Volta. B.J., Cardoni.R.L., Altcheh.J.M., Corral.R.S., Freilij.H.L., and Petray, P.B. (2011). Benznidazole Therapy Modulates Interferon-𝜸 and M2 Muscarinic Receptor Autoantibody Responses in Trypanosoma cruzi-Infected Children. PLoS ONE, 6(10), p.e27133. doi:10.1371/journal.pone.0027133	Full text publication	2011-10-31	Patricia B. Petray. Servicio de Parasitologia y Enfermedad de Chagas, Hospital de Ninos Ricardo Gutierrez, Buenos Aires, Argentina	ppetray@conicet.gov.ar	1	Cutrullis, R., Ballering, G., Altcheh, J., Moscatelli, G., Corral, R., Petray, P. and Freilij, H. (2007). Anti-M2 muscarinic receptor autoantibodies in Trypanosoma cruzi-infected pediatric patients treated with benznidazole. Revista de Patologia Tropical, 36(2), pp.141-148. doi: 10.5216/rpt.v36i2.1804							Unknown			1	Unchecked	Unchecked	Unchecked		Argentina	Parasitology and Chagas Service at Ricardo Gutierrez Children's Hospital, Buenos Aires, Argentina,	(-34.594147,-58.411419)	South America	High	Unchecked	Checked	Unchecked	Unchecked	Unchecked	Checked	Unchecked	Unchecked	Endemic	49	30	30	-1						Unchecked	Unchecked
Cutrullis2011	Study Arm	1
Cutrullis2011	Study Arm	2
Da Silva Marques 2003			-99	Marques, R.D., Marques, M.D., Dias, P. de M., n.d. Eficácia terapêutica do benzonidazol no tratamento de jovens na fase indeterminada da doença de Chagas 6.(2003). Moreira Jr Editora | RBM Revista Brasileira de Medicina	Full text publication	2003-12-15	Ricardo Diniz Marques, Programa de Controle da Doença de Chagas, Ambulatório de Cardiologia, Centro de Diagnósticos e Assistência Secundária, Secretaria Municipal da Saúde, Santa Maria. Rua Honório Magno, 115 Bairro Medianeira CEP 97070-450 - Santa Maria - RS	unknown	0								Unknown			1	Unchecked	Unchecked	Unchecked		Brazil	Department of Health of Santa Maria and Secretariat of Health of Santa Maria, central region of the State of Rio Grande Southern Brazil	-29.701271, -53.814038	South America	Upper middle	Unchecked	Unchecked	Checked	Unchecked	Unchecked	Checked	Unchecked	Unchecked	Endemic	48	48	46	-1						Unchecked	Unchecked
Da Silva Marques 2003	Study Arm	1
Das Neves Pinto2009			-9	Pinto .A.Y.N., Ferreira .A.G., Valente .V.C., Harada .G.S., Valente .S.A.S.,(2009)Urban outbreak of acute Chagas disease in Amazon region of Brazil: four-year follow-up after treatment with benznidazole. Rev Panam Salud Publica.25(1):77-83.	Full text publication	2008-02-05	Ana Yecê das Neves Pinto, Chagas Disease Laboratory, Evandro Chagas Institute, Department of Health Surveillance, Ministry of Health, Belém, Brazil.	ayece@iec.pa.gov.br	0								Unknown			1	Unchecked	Unchecked	Unchecked		Brazil	Belém, Brazil	1.4557° S, 48.4902° W	South America	Upper middle	Unchecked	Unchecked	Checked	Unchecked	Unchecked	Checked	Unchecked	Unchecked	Endemic	11	11	11	-1						Unchecked	Unchecked
Das Neves Pinto2009	Study Arm	1
de Castro2006			-99	de Castro, A., Luquetti, A., Rassi, A., Chiari, E. and da Cunha Galv�o, L. (2006). Detection of parasitemia profiles by blood culture after treatment of human chronic Trypanosoma cruzi infection. Parasitology Research, 99(4), pp.379-383. doi: 10.1007/s00436-006-0172-5	Full text publication	2006-03-29	A. O. Luquetti Laboratório de Chagas, Hospital das Clínicas da Universidade Federal de Goiás, Primeira Avenida s/n, 74605-020 Goiania, GO, Brazil	aluquetti@hotmail.com	1	Castro, A., Luquetti, A., Rassi, A., Rassi, G., Chiari, E., and Galvao, L. (2002). Blood culture and polymerase chain reaction for the diagnosis of the chronic phase of human infection with Trypanosoma cruzi. Parasitology Research, 88(10), pp.894-900. doi: 10.1007/s00436-002-0679-3							Unknown			1	Unchecked	Unchecked	Unchecked		Brazil	Hospital Sao Salvador, Goiania, Goias, Brazil.	-16.678071, -49.267885	South America	Lower middle	Unchecked	Checked	Unchecked	Unchecked	Checked	Unchecked	Unchecked	Unchecked	Endemic	60	60	40	20 patients were excluded because of non-completion of follow-up: 7 treated and 13 untreated Chagas patients.						Unchecked	Unchecked
de Castro2006	Study Arm	1
de Castro2006	Study Arm	2
Egui 2019			-99	Egui, A., Thomas, M.C., Fernández-Villegas, A., Pérez-Antón, E., Gómez, I., Carrilero, B., del Pozo, Á., Ceballos, M., Andrés-León, E., López-Ruz, M.Á., Gainza, E., Oquiñena, E., Segovia, M., López, M.C., 2019. A Parasite Biomarker Set for Evaluating Benznidazole Treatment Efficacy in Patients with Chronic Asymptomatic Trypanosoma cruzi Infection. Antimicrob Agents Chemother 63, e02436-18, /aac/6…	Full text publication	2019-07-29	Instituto de Parasitología y Biomedicina López Neyra, Consejo Superior de Investigaciones Científicas (IPBLN-CSIC). PTS Granada. Avda. del Conocimiento,17. 18016-Granada, Spain.	Tel.:+34958181661,+34958181662;Fax:+34958181632. E-mail: mclopez@ipb.csic.es (M.C. López) and mcthomas@ipb.csic.es (M.C. Thomas).	0								No			1	Unchecked	Unchecked	Unchecked		Spain	Hospital Virgen 581de la Arrixaca (Murcia, Spain) and Hospital Virgen de las Nieves (Granada).	(37.932742, -1.162521), (37.188546, -3.609987)	Western Europe	High	Unchecked	Unchecked	Unchecked	Checked	Unchecked	Unchecked	Unchecked	Checked	Non-endemic	66	66	66	-1						Unchecked	Unchecked
Egui 2019	Study Arm	1
Fernandes2009			-9	Fernandes, C.D., Tiecher, F.M., Balbinot, M.M., Liarte, D.B., Scholl, D., Steindel, M. and Romanha, A. (2009). Efficacy of benznidazol treatment for asymptomatic chagasic patients from state of Rio Grande do Sul evaluated during a three years follow-up. Mem�rias do Instituto Oswaldo Cruz, 104(1), pp.27-32. doi: 10.1590/S0074-02762009000100004	Full text publication	2009-01-11	A Romanha, Instituto de Pesquisa René Rachou-Fiocruz, Belo Horizonte, MG, Brasil.	romanha@cpqrr.fiocruz.br	0								Unknown			1	Unchecked	Unchecked	Unchecked		Brazil	state of Rio Grande do Sul, Brazil	30.0346° S, 51.2177° W	South America	Upper middle	Unchecked	Unchecked	Unchecked	Checked	Unchecked	Checked	Unchecked	Unchecked	Endemic	130	80	80	-1						Unchecked	Unchecked
Fernandes2009	Study Arm	1
Fernandes2009	Study Arm	2
Fernandez-Villegas 2011			-99	Fernández-Villegas, A., Pinazo, M.J., Marañón, C., Thomas, M.C., Posada, E., Carrilero, B., Segovia, M., Gascon, J., López, M.C., 2011. Short-term follow-up of chagasic patients after benznidazole treatment using multiple serological markers. BMC Infect. Dis. 11. https://doi.org/10.1186/1471-2334-11-206	Full text publication	2011-07-31	Manuel C López, Departamento de Biología Molecular. Instituto de Parasitología y Biomedicina López Neyra - Consejo Superior de Investigaciones Científicas (IPBLN-CSIC). Parque Tecnológico de Ciencias de la Salud - Avda. del Conocimiento s/n. 18100-Granada, Spain	mclopez@ipb.csic.es	0								Unknown			4	Unchecked	Checked	Unchecked	Serum samples from 46 adult Chagas disease patients and 22 control sera from healthy adult donors (HD). Sera were collected from 15 patients suffering autoimmune diseases from non-endemic areas: Systemic Lupus Erythematosus (SLE) (n = 6), celiac disease (n = 4) and rheumatoid arthritis (n = 5) 24 serum samples from patients suffering leprosy (n = 8), tuberculosis (n = 8) and malaria (n = 8) from …	Spain	Hospital Clínic in Barcelona and Hospital Virgen de la Arrixaca in Murcia (Spain).	(41.3895° N, 2.1523° E), (37.932780, -1.162060)	Southern Europe	High	Unchecked	Checked	Unchecked	Unchecked	Unchecked	Checked	Unchecked	Checked	Non-endemic	46	46	25	-1	Spain	Hospital Clínic in Barcelona and Hospital Virgen de la Arrixaca in Murcia (Spain).	(41.3895° N, 2.1523° E), (37.932780, -1.162060)	Southern Europe	High	Unchecked	Checked
Fernandez-Villegas 2011	Study Arm	1
Fernandez-Villegas2016			-99	Fernandez-Villegas, A., Thomas, M., Carrilero, B., Lasso, P., Egui, A., Murcia, L., Segovia, M., Alonso, C. and L�pez, M. (2016). A 12-mer repetitive antigenic epitope fromTrypanosoma cruziis a potential marker of therapeutic efficacy in chronic Chagas' disease. Journal of Antimicrobial Chemotherapy, 71(7), pp.2005-2009. doi:10.1093/jac/dkw090	Full text publication	2016-12-04	Manuel Carlos Lopez, Instituto de Parasitologia y Biomedicina Lopez Neyra, Consejo Superior de Investigaciones Cientificas (IPBLN-CSIC), PTS Granada, Avda. del Conocimiento S/N, 18100 Granada, Spain	mclopez@ipb.csic.es	1	Online supplementary data (patient details)							Unknown			1	Unchecked	Unchecked	Unchecked		Spain	Hospital Virgen de la Arrixaca (Murcia, Spain)	37.932531, -1.162119	Southern Europe	High	Unchecked	Checked	Unchecked	Unchecked	Unchecked	Checked	Unchecked	Unchecked	Non-endemic	85	85	85	-1						Unchecked	Unchecked
Fernandez-Villegas2016	Study Arm	1
Fernandez2016			-99	Fern�ndez, M., Marson, M., Ramirez, J., Mastrantonio, G., Schijman, A., Altcheh, J., Riarte, A. and Bournissen, F. (2016). Pharmacokinetic and pharmacodynamic responses in adult patients with Chagas disease treated with a new formulation of benznidazole. Mem�rias do Instituto Oswaldo Cruz, 111(3), pp.218-221. doi: 10.1590/0074-02760150401	Full text publication	2016-03-15	Marisa Liliana Fern�ndez, Instituto Nacional de Parasitolog�a Dr M Fatala Chab�n, Buenos Aires, Argentina	marisa.fernandez@gmail.com	0								Unknown			1	Unchecked	Unchecked	Unchecked		Argentina	Unknown	-99	South America	Upper middle	Unchecked	Unchecked	Unchecked	Checked	Unchecked	Unchecked	Unchecked	Checked	Endemic	6	6	6	-1						Unchecked	Unchecked
Fernandez2016	Study Arm	1
Flevaud 2015			NCT01678599	Flevaud, L.; Loza, L.; Enriquez, M.; Fernandez, F.; Torrico, F.; Garcia, L.; Perotti, C.; Palma, P. P.; Blum, B.; Fernandes, J.; Rode, J.; Alves, F. P.; Schijman, A. G.; Ribeiro, I. Optimisation of PCR sampling techniques for assessment of parasitological response in patients with chronic Chagas disease. Tropical Medicine and International Health 2015;20():327	Conference abstract	2015-01-15	I. Ribeiro, Drugs for Neglected Diseases Initiative, Geneva, Switzerland;	Unknown	1	Powerpoint presentation of study - https://www.dndi.org/wp-content/uploads/2015/09/Isabela_Riberio_PCR_DNDi_ECTMIH_2015.pdf							Unknown			1	Unchecked	Unchecked	Unchecked		Bolivia	16 communities involved in Narciso Campero district - Bolivia	-18.258479, -64.894095	South America	Lower middle	Unchecked	Unchecked	Unchecked	Checked	Unchecked	Unchecked	Unchecked	Checked	Endemic	220	220	111	-1						Unchecked	Unchecked
Flevaud 2015	Study Arm	1
Flores-Chavez2006			-99	Flores-Chavez M., Bosseno M., Bastrenta B., Alcazar Dalenz J., Hontebeyrie M., Revollo S., Breni�re S. (2006). Polymerase chain reaction detection and serologic follow-up after treatment with benznidazole in Bolivian children infected with a natural mixture of Trypanosoma cruzi I and II. Am J Trop Med Hyg. (75), pp.497-501. doi: 10.4269/ajtmh.2006.75.497	Full text publication	2005-11-30	Address correspondence to Simone Fr�d�rique Breni�re, Unite de Recherche 008 Pathog�nie des Trypanosomatid�s, Institut de Recherche pour le D�veloppement, 911 Avenue Agropolis, BP 5045, 34032 Montpellier Cedex 1, France.	breniere@mpl.ird.fr	0											1	Unchecked	Unchecked	Unchecked		Bolivia	Buenas Nuevas School and the Harry Williams Hospital in the Huayrakhasa sector of the Cochabamba city in Bolivia.	-17.419283, -66.145920	South America	Lower middle	Checked	Checked	Unchecked	Unchecked	Unchecked	Checked	Unchecked	Unchecked	Endemic	35	35	35	-1						Unchecked	Unchecked
Flores-Chavez2006	Study Arm	1
Forsyth2016			-99	Forsyth, C., Hernandez, S., Olmedo, W., Abuhamidah, A., Traina, M., Sanchez, D., Soverow, J. and Meymandi, S. (2016). Safety Profile of Nifurtimox for Treatment of Chagas Disease in the United States. Clinical Infectious Diseases, 63(8), pp.1056-1062. doi: 10.1093/cid/ciw477	Full text publication	2016-07-17	C. J. Forsyth, Center of Excellence for Chagas Disease, Olive View - UCLA Medical Center, 14445 Olive View Dr, Sylmar, CA 91342	cforsyth@dndi.org	0								Unknown			1	Unchecked	Unchecked	Unchecked		United States	Center of Excellence for Chagas Disease (CECD) at the Olive View-University of California, Los Angeles Medical Center	34.326373, -118.446103	Northern America	High	Unchecked	Checked	Unchecked	Unchecked	Unchecked	Checked	Unchecked	Unchecked	Non-endemic	53	53	53	-1						Unchecked	Unchecked
Forsyth2016	Study Arm	1
Francisco-Gonzalez 2017			-99	Francisco-Gonzalez, L.; Gastanaga-Holguera, T.; Jimenez Montero, B.; Daoud Perez, Z.; Illan Ramos, M.; Merino Amador, P.; Herraiz Martinez, M. A.; Ramos Amador, J. T. [Seroprevalence and vertical transmission of�Chagas�disease in a cohort of Latin-american pregnant women in a tertiary hospital in Madrid]. Anales de pediatria (Barcelona, Spain : 2003) 2017;():	Full text publication	2017-12-04	Laura Francisco-Gongalez	Laura.francisco.gonzalez@gmail.com	0								Unknown			1	Unchecked	Unchecked	Unchecked		Spain	Tertiary hopsital in Madrid	40.417078, -3.703705	Southern Europe	High	Unchecked	Checked	Unchecked	Unchecked	Unchecked	Unchecked	Unchecked	Checked	Endemic	40	40	35	-1						Unchecked	Unchecked
Francisco-Gonzalez 2017	Study Arm	1
Fumado 2014			-99	Fumado, V.; Juncosa, T.; Posada, E.; Fisa, R.; Gallego, M.; Gascon, J. Paediatric�chagas�in a non-endemic area. Enfermedades Infecciosas y Microbiologia Clinica Monografias 2014;32(5):293-296	Full text publication	2014-01-31	Teresa Juncosa	email: tjuncosa@hsjdbcn.org	0								Unknown			1	Unchecked	Unchecked	Unchecked		Spain	Imported Medicine of the Hospital Sant Joan de Deu in Barcelona	41.384264, 2.102131	Southern Europe	High	Unchecked	Checked	Unchecked	Unchecked	Unchecked	Unchecked	Unchecked	Checked	Endemic	22	22	22	-1						Unchecked	Unchecked
Fumado 2014	Study Arm	1
Garcia-Bournissen2015			NCT01547533	Garc�a-Bournissen, F., Moroni, S., Marson, M., Moscatelli, G., Mastrantonio, G., Bisio, M., Cornou, L., Ballering, G. and Altcheh, J. (2014). Limited infant exposure to benznidazole through breast milk during maternal treatment for Chagas disease. Archives of Disease in Childhood, 100(1), pp.90-94. doi: 10.1136/archdischild-2014-306358.	Full text publication	2014-10-09	Dr Facundo Garc�a-Bournissen, Parasitology and Chagas Service, Buenos Aires Children's Hospital 'Dr Ricardo Gutierrez', Gallo 1330, Buenos Aires 1425, Argentina	facugb@hotmail.com	0								Unknown			2	Unchecked	Checked	Unchecked	Lactating mothers with Chagas disease and their breastfed infants.	Argentina	Parasitology and Chagas Service at Buenos Aires Children's Hospital 'Ricardo Gutierrez'	-34.594227, -58.411425	South America	Upper middle	Unchecked	Checked	Unchecked	Unchecked	Unchecked	Checked	Unchecked	Unchecked	Endemic	12	12	10	-1	Argentina	Parasitology and Chagas Service at Buenos Aires Children's Hospital 'Ricardo Gutierrez'	-34.594227, -58.411425	South America	Upper middle	Unchecked	Checked
Garcia-Bournissen2015	Study Arm	1
Garcia-Bournissen2015	Study Arm	2
Gorgolas 2013			-99	Gorgolas, M.; Robles, I.; Cabello, A.; Perez-Tanoira, R.; Peremarch, C. P. J.; Fernandez-Roblas, R.; Williams, F.; Manuel Ramos Rincon, J. The use of steroids to prevent cutaneous reactions to benznidazole in patients with Chagas disease. Pathogens and Global Health 2013;107(3):157-160	Full text publication	2013-04-15	Miguel Gorgolas, Avda. Reyes Cato´ licos, 2, Infectious Diseases, Fundacion Jimenez Diaz, Universidad Autonoma de Madrid, Madrid 28040, Spain.	mgorgolas@me.com	0								Unknown			1	Unchecked	Unchecked	Unchecked		Spain	Division of Infectious Diseases at the Fundacion Jimenez Dıaz in Madrid (Spain).	40.439261, -3.718379	Southern Europe	High	Unchecked	Checked	Unchecked	Unchecked	Unchecked	Unchecked	Unchecked	Checked	Non-endemic	39	39	39	-1						Unchecked	Unchecked
Gorgolas 2013	Study Arm	1
Gorgolas 2013	Study Arm	2
Gray 2018			-99	Gray, E.B., La Hoz, R.M., Green, J.S., Vikram, H.R., Benedict, T., Rivera, H., Montgomery, S.P., 2018. Reactivation of Chagas disease among heart transplant recipients in the United States, 2012-2016. Transpl Infect Dis 20, e12996. https://doi.org/10.1111/tid.12996	Full text publication	2018-12-15	Correspondence Elizabeth B. Gray, Parasitic Diseases Branch, Centers for Disease Control and Prevention, Atlanta, GA.,	ebgray@cdc.gov.	0								No			1	Unchecked	Unchecked	Unchecked		United States	The transplants were performed at hospitals across the United States: California (n = 10), New York (n = 4), District of Columbia (n = 2), Florida (n = 2), New Jersey (n = 2), Texas (n = 2), Virginia (n = 2), Arizona (n = 1), Maryland (n = 1), Massachusetts (n = 1), Minnesota (n = 1), North Carolina (n = 1), Utah (n = 1), and Wisconsin (n = 1).	(36.7783° N, 119.4179° W,) (40.7128° N, 74.0060° W), (38.9072° N, 77.0369° W), (27.6648° N, 81.5158° W), (40.0583° N, 74.4057° W), (31.9686° N, 99.9018° W), (37.4316° N, 78.6569° W), (34.0489° N, 111.0937° W), (39.0458° N, 76.6413° W), (42.4072° N, 71.3824° W), (46.7296° N, 94.6859° W), (35.7596° N, 79.0193° W), (39.3210° N, 111.0937° W), (43.7844° N, 88.7879° W)	Northern America	High	Unchecked	Checked	Unchecked	Unchecked	Unchecked	Checked	Unchecked	Unchecked	Non-endemic	31	24	24	-1						Unchecked	Unchecked
Gray 2018	Study Arm	1
Jackson2010			-99	Jackson, Y., Alirol, E., Getaz, L., Wolff, H., Combescure, C. and Chappuis, F. (2010). Tolerance and Safety of Nifurtimox in Patients with Chronic Chagas Disease. Clinical Infectious Diseases, 51(10), pp.e69-e75., https://doi.org/10.1086/656917	Full text publication	2010-10-08	correspondence: Dr Yves Jackson, Div of Primary Care Medicine, Dept of Community Medicine and Primary Care, Geneva University Hospitals, Rue Gabrielle-Perret-Gentil 6, 1211 Geneva 14, Switzerland	yves.jackson@hcuge.ch	2	Jackson, Y., Chatelain, E., Mauris, A., Holst, M., Miao, Q., Chappuis, F. and Ndao, M. (2013). Serological and parasitological response in chronic Chagas patients 3 years after nifurtimox treatment. BMC Infectious Diseases, 13(1). doi: 10.1186/1471-2334-13-85	Santamaria, C., Chatelain, E., Jackson, Y., Miao, Q., Ward, B.J., Chappuis, F., Ndao, M., 2014. Serum biomarkers predictive of cure in Chagas disease patients after nifurtimox treatment. BMC Infect. Dis. 14, 302. https://doi.org/10.1186/1471-2334-14-302						Unknown			1	Unchecked	Unchecked	Unchecked		Switzerland	Geneva University Hospitals, Geneva, Switzerland	46.193627, 6.149020	Western Europe	High	Unchecked	Checked	Unchecked	Unchecked	Unchecked	Unchecked	Unchecked	Checked	Non-endemic	81	81	73	3 year follow-up was available for 37 patients (Jackson2013)						Unchecked	Unchecked
Jackson2010	Study Arm	1
Lacunza2006			-99	Lacunza C., Negrete O., Mora M., Uncos A., Segura M., Del Castillo N., Garayzabal M., Basombr�o M. (2006). Use of the Polymerase Chain Reaction (PCR) for early evaluation of etiological treatment in young adults chronically infected with Trypanosoma cruzi. Revista de Patologia Tropical, 35(3), pp.227-232.	Full text publication	2006-12-26	Dr. Carlos D. Lacunza, Mitre 664 (4400) Salta, Argentina	diegolacunza@yahoo.com.ar	0								Unknown			1	Unchecked	Unchecked	Unchecked		Argentina	Salta city, Argentina	Salta Province, Argentina	South America	Upper middle	Unchecked	Checked	Unchecked	Unchecked	Unchecked	Checked	Unchecked	Unchecked	Endemic	23	23	19	18 patients started treatment (14 completed treatment) plus 5 untreated patients.						Unchecked	Unchecked
Lacunza2006	Study Arm	1
Lacunza2006	Study Arm	2
Lacunza 2015			-99	Lacunza, C.D; Negrette, O.L; Mora, M.C; Bustos, Maria Fernanda Garcia and Basombrio, M.A. UUse of the polymerase chain reaction (PCR) for the therapeutic control of chronic Trypanosoma cruzi infection. Rev. patol. trop 2015;44(1):21-32.doi:10.5216/rpt.v44i1.34815	Full text publication	2015-03-16	Not provided	Not provided	0								Unknown			1	Unchecked	Unchecked	Unchecked		Argentina	National University of Salta, Argentina	-24.728029, -65.409295	South America	High	Unchecked	Unchecked	Checked	Unchecked	Unchecked	Checked	Unchecked	Unchecked	Endemic	138	138	94	-1						Unchecked	Unchecked
Lacunza 2015	Study Arm	1
Lacunza 2015	Study Arm	2
Laucella2009			-99	Laucella, S., Mazliah, D., Bertocchi, G., Alvarez, M., Cooley, G., Viotti, R., Albareda, M., Lococo, B., Postan, M., Armenti, A. and Tarleton, R. (2009). Changes in Trypanosoma cruzi-Specific Immune Responses after Treatment: Surrogate Markers of Treatment Efficacy. Clinical Infectious Diseases, 49(11), pp.1675-1684. doi: 10.1086/648072	Full text publication	2009-10-30	Dr Rick L. Tarleton, Center for Tropical and Emerging Global Diseases, University of Georgia, 310 Coverdell Bldg, 500 D. W. Brooks Dr, Athens, GA 30602	Tarleton@cb.uga.edu	1	Alvarez, M., Bertocchi, G., Cooley, G., Albareda, M., Viotti, R., Perez-Mazliah, D., Lococo, B., Castro Eiro, M., Laucella, S. and Tarleton, R. (2016). Treatment Success in Trypanosoma cruzi Infection Is Predicted by Early Changes in Serially Monitored Parasite-Specific T and B Cell Responses. PLOS Neglected Tropical Diseases, 10(4), p.e0004657. doi: 10.1371/journal.pntd.0004657							Unknown			2	Unchecked	Unchecked	Checked	Chagas patients in Kuschnir group 0 were assigned randomly to the treated and untreated group; Kuschnir group 1 patients were all assigned to the treatment group on the basis of previous studies demonstrating clear evidence of the efficacy of treatment on progression of disease in this subject group.	Argentina	Chagas Disease Section of Hospital Interzonal General de Agudos 'Eva Per�n', Buenos Aires, Argentina.	-34.571715, -58.554540	South America	Upper middle	Unchecked	Checked	Unchecked	Unchecked	Unchecked	Unchecked	Unchecked	Checked	Endemic	67	67	67	-1	Argentina	Chagas Disease Section of Hospital Interzonal General de Agudos 'Eva Per�n', Buenos Aires, Argentina.	-34.571715, -58.554540	South America	Upper middle	Unchecked	Checked
Laucella2009	Study Arm	1
Laucella2009	Study Arm	2
Llaguno 2019			protocol no. 1030	Llaguno, M., et al. (2019). "T-Cell Immunophenotyping and Cytokine Production Analysis in Patients with Chagas Disease 4 Years after Benznidazole Treatment." Infection and Immunity 87:e00103-19. https://doi.org/10.1128/IAI.00103-19..	Full text publication	2019-07-23	Marcos Vinicius da Silva Department of Microbiology, Immunology and Parasitology, Federal University of Triângulo Mineiro, Uberaba, Minas Gerais, Brazil	marcosuftm@gmail.com.	0								Unknown			1	Unchecked	Unchecked	Unchecked		Brazil	Chagas disease Outpatient Service of Universidade Federal do Triângulo Mineiro (UFTM) Uberaba, Minas Gerais, Brazil	-19.754757, -47.931229	South America	Upper middle	Unchecked	Checked	Unchecked	Unchecked	Unchecked	Unchecked	Unchecked	Checked	Endemic	32	32	17	-1						Unchecked	Unchecked
Llaguno 2019	Study Arm	1
Martinez-Perez2016			-99	Martinez-Perez, A., Poveda, C., Ram�rez, J., Norman, F., Giron�s, N., Guhl, F., Monge-Maillo, B., Fresno, M. and L�pez-V�lez, R. (2016). Prevalence of Trypanosoma cruzi's Discrete Typing Units in a cohort of Latin American migrants in Spain. Acta Tropica, 157, pp.145-150. doi: 10.1016/j.actatropica.2016.01.032	Full text publication	2016-02-02	R. L�pez-V�lez, National Referral Centre for Tropical Diseases, Infectious Diseases Department, Ram�n y Cajal University Hospital, IRICYS, Ctra Colmenar, Km 9,100, 28034 Madrid, Spain.	rogelio.lopezvelez@salud.madrid.org	1	Martinez Perez, A., Poveda, C., Ramirez, J. D., Norman, F., Girones, N., Guhl, F., . . . Lopez-Velez, R. (2015). Clinical implications of Trypanosoma cruzi's discrete typing units in a cohort of Latin American migrants. Tropical Medicine and International Health, 20, 386. Retrieved from https://onlinelibrary.wiley.com/doi/pdf/10.1111/tmi.12574. doi:http://dx.doi.org/10.1111/tmi.12574							Unknown			1	Unchecked	Unchecked	Unchecked		Spain	Tropical Medicine Referral Centre of the Ramon y Cajal Hospital (Madrid, Spain)	40.487710, -3.694568	Southern Europe	High	Unchecked	Checked	Unchecked	Unchecked	Unchecked	Unchecked	Unchecked	Checked	Non-endemic	149	149	149	-1						Unchecked	Unchecked
Martinez-Perez2016	Study Arm	1
Mateus 2017			-99	Mateus, J., Pérez-Antón, E., Lasso, P., Egui, A., Roa, N., Carrilero, B., González, J.M., Thomas, M.C., Puerta, C.J., López, M.C., Cuéllar, A., 2017. Antiparasitic Treatment Induces an Improved CD8 + T Cell Response in Chronic Chagasic Patients. The Journal of Immunology 198, 3170-3180. https://doi.org/10.4049/jimmunol.1602095	Full text publication	2017-03-03	Dr. Adriana Cue ́llar; Dr. Manuel C. Lo ́pez. Grupo de Inmunolog ́ıa y Biolog ́ıa Celular, Departamento de Microbiolog ́ıa, Facultad de Ciencias, Pontificia Universidad Javeriana, Carrera 7 #43-82, Edificio 50 (Fe ́lix Restrepo) Oficina 608, 110231 Bogota D.C., Colombia (A.C) or Instituto de Parasitolog ́ıa y Biomedicina Lo ́pez Neyra, Consejo Superior de Investigaciones Cient ́ıf- icas, Avenida …	E-mail addresses: acuellar@javeriana.edu.co (A.C) or mclopez@ipb.csic.es (M.C.L.)	1	http://www.jimmunol.org/content/suppl/2017/03/03/jimmunol.1602095.DCSupplemental							Unknown			2	Checked	Unchecked	Checked	The first group included chagas patients from Columbia, the second included patients from Bolivia who were treated in Spain	Columbia	Instituto Nacional de Salud and at the Hospital Universitario San Ignacio in Bogota, Colombia.	4.641606, -74.095112; 4.628279, -74.064000	South America	Upper middle	Unchecked	Checked	Unchecked	Unchecked	Unchecked	Unchecked	Unchecked	Checked	Endemic	38	38	-99	-1	Spain	Hospital Virgen de la Arrixaca in Murcia, Spain.	37.932509, -1.162080	Southern Europe	High	Unchecked	Checked
Mateus 2017	Study Arm	1
Mateus 2017	Study Arm	2
Mateus 2017	Study Arm	3
Meira 2006			-99	Meira, W. S.; de Castro, A. M.; Gontijo, E. D.; Rassi, A.; Luquetti, A. O.; Machado-Coelhos, G. L.; Chiari, E.; Galvao, L. M. Evaluation of blood tests, complement-mediated lysis and polymerase chain reaction in the verification of therapeutic efficacy in Chagas disease. Revista da Sociedade Brasileira de Medicina Tropical 2006;39 Suppl 3():107-109	Full text publication	2006-01-15	Wendell S.F Meira, Disciplina de Parasitologia, Departmento de ciencias Biologicas, UFTM.	wendell@dcb.uftm.edu.br	1	Fundacao Nacional de Saude-FUNASA. Tratamento Etiologico da doenca de chagas-Brasilia.Coordenacao de controle de Doencas Transmitidas por vetores-Gerencia Tecnica de Doenca de Chagas, 2 edicao 32p, 1997.							Unknown			1	Unchecked	Unchecked	Unchecked		Unknown	Unknown	-99			Unchecked	Unchecked	Unchecked	Checked	Unchecked	Unchecked	Unchecked	Checked		40	40	40	-1						Unchecked	Unchecked
Meira 2006	Study Arm	1
Meira 2006	Study Arm	2
Molina2014; CHAGASAZOL			NCT01162967; EUDRACT 2009-017467-42	Molina, I., G�mez i Prat, J., Salvador, F., Trevi�o, B., Sulleiro, E., Serre, N., Pou, D., Roure, S., Cabezos, J., Valerio, L., Blanco-Grau, A., S�nchez-Montalv�, A., Vidal, X. and Pahissa, A. (2014). Randomized Trial of Posaconazole and Benznidazole for Chronic Chagas' Disease.�New England Journal of Medicine, 370(20), pp.1899-1908. doi: 10.1056/NEJMoa1313122	Full text publication	2014-05-15	Dr. Molina, Infectious Disease Department, Vall d'Hebron Teaching Hospital, PROSICS Barcelona, P� Vall d'Hebron 119-129, 08035 Barcelona, Spain	imolina@vhebron.net	2	Study protocol (Molina2014_protocol) was downloaded from NEJM.org.	Molina, I.; Prat, J. G. I.; Salvador, F.; Trevino, B.; Serre, N.; Sulleiro, E.; Pou, D.; Roure, S.; Cabezos, J.; Valerio, L.; Pahissa, A. Phase IIb clinical trial with posaconazol and benznidazol for chronic Chagas disease. Tropical Medicine and International Health 2013;18():60 2013						Unknown			1	Unchecked	Unchecked	Unchecked		Spain	Three centres participating in the International Health Program of the Catalan Institute of Health (PROSICS): Hospital Universitario Vall d'Hebron, Drassanes; Tropical Medicine and International Health Unit, Barcelon�s Nord i Maresme Tropical Medicine; and International Health Unit, Barcelona, Catalonia.	41.405437, 2.136379	Southern Europe	High	Unchecked	Checked	Unchecked	Unchecked	Unchecked	Unchecked	Unchecked	Checked	Non-endemic	78	78	62	Each treatment arm started with 26 participants. Patients with full follow-up: 17 + 25 + 20.						Unchecked	Unchecked
Molina2014; CHAGASAZOL	Study Arm	1
Molina2014; CHAGASAZOL	Study Arm	2
Molina2014; CHAGASAZOL	Study Arm	3
Molina2015			-99	Molina, I., Salvador, F., Sanchez-Montalva, A., Trevino, B., Serre, N., Sao Aviles, A. and Almirante, B. (2015). Toxic Profile of Benznidazole in Patients with Chronic Chagas Disease: Risk Factors and Comparison of the Product from Two Different Manufacturers. Antimicrobial Agents and Chemotherapy, 59(10), pp.6125-6131. doi:10.1128/AAC.04660-14	Full text publication	2015-07-20	Israel Molina, Infectious Disease Department, Vall d'Hebron Teaching Hospital, and International Health Program of the Catalan Institute of Health (PROSICS) Barcelona, Universitat Spain Autònoma de Barcelona, Barcelona,Spain.	molina@vhebron.net	0								Unknown			1	Unchecked	Unchecked	Unchecked		Spain	Infectious Diseases Department of the University Hospital Vall d'Hebron, a tertiary hospital, included in The International Health Program of Catalonian Health Institute, PROSICS Barcelona, Spain.	41.427912, 2.141873	Southern Europe	High	Unchecked	Checked	Unchecked	Unchecked	Unchecked	Checked	Unchecked	Unchecked	Non-endemic	472	472	472	-1						Unchecked	Unchecked
Molina2015	Study Arm	1
Molina2015	Study Arm	2
Momper 2019			-99	Momper JD, Hanan NJ, Rossi SS, Mirochnick MH, Cafferata ML, Lavenia A, Flores I, Gibbons L, Ciganda A, Sosa Estani S, Capparelli EV, Buekens P. Determination of Benznidazole in Human Dried Blood Spots by Liquid Chromatography-Mass Spectrometry to Monitor Adherence to Trypanosoma cruzi Infection Treatment in Infants and Children. Am J Trop Med Hyg. 2019 Jul;101(1):116-122. doi: 10.4269/ajtmh.18-08…	Full text publication	2019-07-15	Jeremiah D. Momper	Skaggs School of Pharmacy and Pharmaceutical Sciences, University of California, San Diego, 9500 Gilman Dr., MC 0657, La Jolla, CA 92093-0657. E-mail:jmomper@ucsd.edu	0								Unknown			2	Unchecked	Checked	Unchecked	The population consisted of infants and their siblings who were infected with T. cruzi and receiving BZ from their clinical care provider.	Argentina	Tucuman Province, Argentina	-26.896022, -65.414174	South America	Upper middle	Unchecked	Unchecked	Unchecked	Checked	Unchecked	Unchecked	Unchecked	Checked	Endemic	10	10	10	-1	Argentina	Tucuman Province, Argentina	-26.896022, -65.414174	South America	Upper middle	Unchecked	Unchecked
Momper 2019	Study Arm	1
MonjeRumi2013			-99	Monje Rumi, M., P�rez Brand�n, C., Gil, J., D'Amato, A., Ragone, P., Lauthier, J., Tomasini, N., Cimino, R., Orellana, V., Lacunza, C., Nasser, J., Basombr�o, M. and Diosque, P. (2013). Benznidazole treatment in chronic children infected with Trypanosoma cruzi: Serological and molecular follow-up of patients and identification of Discrete Typing Units. Acta Tropica, 128(1), pp.130-136. doi: 10.10…	Full text publication	2013-07-20	Corresponding author: M.M. Monje Rumi Avda. Bolivia 5150, Salta, Argentina. Tel.: +54 387 4255333; fax: +54 387 4255333.	mercedesmonjerumi@yahoo.com.ar	0											2	Unchecked	Unchecked	Checked	The study was carried out in Pampa Avila and Tres Estacas, two settlements situated in Chacabuco department, in the Chaco Province, Argentina. Blood samples from patients from Pampa vila were collected before treatment (2007) and two years after treatment (2009). In Tres Estacas, blood samples were taken before treatment (2004) and two and five years after treatment (2006 and 2009).	Argentina	Pampa Avila, a settlement in Chacabuco department, in the Chaco Province, Argentina.	-36.631250, -64.261130	South America	Upper middle	Unchecked	Unchecked	Unchecked	Checked	Checked	Unchecked	Unchecked	Unchecked	Endemic	25	25	23	-1	Argentina	Tres Estacas, a settlement in Chacabuco department, in the Chaco Province, Argentina.	-34.64201, -60.471279	South America	Upper middle	Unchecked	Unchecked
MonjeRumi2013	Study Arm	1
Moreira 2015b			-99	Moreira, C. H.; Carvalho, N. B.; Ferrufino, R. Q.; Guastini, C. M.; Lindoso, J. A. L.; Oliveira, L. C.; Manuli, E. R.; Souza, M.; Sabino, E. C. Benznidazole-related adverse drug reactions in Brazilian patients with chagas disease. American Journal of Tropical Medicine and Hygiene 2015;93(4 Supplement):336	Conference abstract	2015-01-15	Not available in abstract	Not available in abstract	0								Unknown			1	Unchecked	Unchecked	Unchecked		Brazil	Brazil, no further information provided	-10.052642, -53.914091	South America	Upper middle	Unchecked	Unchecked	Unchecked	Checked	Unchecked	Unchecked	Unchecked	Checked	Endemic	93	93	79	-1						Unchecked	Unchecked
Moreira 2015b	Study Arm	1
Morillo2015; BENEFIT trial			NCT00123916; ISRCTN13967269	Morillo, C.A., Marin-Neto, J.A., Avezum, A., Sosa-Estani, S., Rassi, A., Rosas, F., Villena, E., Quiroz, R., Bonilla, R., Britto, C., Guhl, F., Velazquez, E., Bonilla, L., Meeks, B., Rao-Melacini, P., Pogue, J., Mattos, A., Lazdins, J., Rassi, A., Connolly, S.J and Yusuf, S. (2015). Randomized Trial of Benznidazole for Chronic Chagas' Cardiomyopathy.New England Journal of Medicine, 373(14), pp.12…	Full text publication	2015-09-01	Dr. Morillo at the Population Health Research Institute, Hamilton Health Sciences and McMaster University, David Braley CVSRI Rm. 3C-120, Hamilton, ON L8L 2X2, Canada	morillo@hhsc.ca	6	Marin-Neto, J., Rassi, A., Morillo, C., Avezum, A., Connolly, S., Sosa-Estani, S., Rosas, F. and Yusuf, S. (2008). Rationale and design of a randomized placebo-controlled trial assessing the effects of etiologic treatment in Chagas' cardiomyopathy: The Benznidazole Evaluation For Interrupting Trypanosomiasis (BENEFIT).American Heart Journal, 156(1), pp.37-43. doi: 10.1016/j.ahj.2008.04.001	Marin-Neto, J., Rassi Jr, A., Avezum Jr, A., Mattos, A. and Rassi, A. (2009). The BENEFIT trial: testing the hypothesis that trypanocidal therapy is beneficial for patients with chronic Chagas heart disease.�Mem�rias do Instituto Oswaldo Cruz, 104(suppl 1), pp.319-324. Erratum in: Mem Inst Oswaldo Cruz. 2009 Sep;104(6):937. doi: 10.1590/S0074-02762009000900042	additional online information: Morillo2015_appendix and Morillo2015_protocol	Moreira, O., Ramirez, J., Velazquez, E., Melo, M., Lima-Ferreira, C., Guhl, F., Sosa-Estani, S., Marin-Neto, J., Morillo, C. and Britto, C. (2013) Towards the establishment of a consensus real-time qPCR to monitor Trypanosoma cruzi parasitemia in patients with chronic Chagas disease cardiomyopathy: A substudy from the BENEFIT trial. Acta Tropica 125(1), pp.23-31	Poveda, C., Fresno, M., Giron�s, N., Martins-Filho, O., Ram�rez, J., Santi-Rocca, J., Marin-Neto, J., Morillo, C., Rosas, F. and Guhl, F. (2014). Cytokine Profiling in Chagas Disease: Towards Understanding the Association with Infecting Trypanosoma cruzi Discrete Typing Units (A BENEFIT TRIAL Sub-Study). PLoS ONE, 9(3), p.e91154.	Schmidt, A., Dias Romano, M.M., Marin-Neto, J.A., Rao-Melacini, P., Rassi, A., Mattos, A., Avezum, Á., Villena, E., Sosa-Estani, S., Bonilla, R., Yusuf, S., Morillo, C.A., Maciel, B.C., 2019. Effects of Trypanocidal Treatment on Echocardiographic Parameters in Chagas Cardiomyopathy and Prognostic Value of Wall Motion Score Index: A BENEFIT Trial Echocardiographic Substudy. Journal of the American…		Unknown			5	Checked	Unchecked	Unchecked	The study was conducted in 49 centers in Argentina, Bolivia, Brazil, Colombia, and El Salvador.	Brazil	Ribeirao Preto Medical School-University of Sao Paulo, Santa Casa de de Votuporanga, Universidade Federal da Bahia, Evandro Chagas National Institute of Infectious Diseases (INI-FIOCRUZ), Cardio diagnosis, Instituto de Moléstias Cardiovasculares - IMC, Pronto Socorro De Cardiologia De Pernambuco (PROCAPE) Hosptial Oswaldo Cruz; Universidada De Pernambuco, Hospital das Clinicas, Federal University…	(-21.165801,-47.846050), (-20.426078, -49.978029), (-13.001087, -38.509089), (-22.879138, -43.243542), (-23.250808, -47.852242), (-8.048929, -34.887256), (-16.673680, -49.245441), (-23.584539, -46.651828), (-22.842169, -43.237693), (-19.923965, -43.929431), (-12.969968, -38.503135), (-22.920157, -47.119823), (-20.828250, -49.397463), (-19.754570, -47.931205), (-23.554040, -46.667395), (-25.423803…	South America	Upper middle	Checked	Checked	Unchecked	Unchecked	Unchecked	Unchecked	Unchecked	Checked	Endemic	1358	1358	1358	-1	Argentina	- Hospital Rawson, Centro de Chagas, San Juan - Prevencion Cardiovascular Hospital San Bernardo, Salta - Instituto Nacional de Parasitologia - Instituto de Cardiologia, -Hospital Provincial del Centenario, Cardiología, Rosario. -Hospital Juan A. Fernandez, Cdad. de Buenos Aires -HIGA Diego Paroissien, Pcia de Buenos Aires -Hospital Nacional Profesor Alejandro Posadas, Pcia de Buenos Aires: -Hospi…	31.5351° S, 68.5386° W, (-24.791502, -65.399179),(-34.614096, -58.368788), ( -34.552642, -58.448899), (-32.938488, -60.665181), ( -34.581112, -58.406919), (-34.696905, -58.577452), (-34.629907, -58.575159), (-28.467926, -62.839422), (-31.740394, -60.523295), (-34.637774, -58.393565), (-34.343330, -58.790538), (-28.470852, -65.777132), (-34.622645, -58.948766), (-27.790282, -64.259029)	South America	High	Unchecked	Checked
Morillo2015; BENEFIT trial	Study Arm	1
Morillo2015; BENEFIT trial	Study Arm	2
Morillo2017_2; STOP-CHAGAS			NCT01377480	Morillo, C.A., Waskin, H., Sosa-Estani, S., Bangher, M.C., Cuneo, C., Milesi, R., Mallagray, M., Apt, W., Beloscar, J., Gascon, J., Molina, I., Echeverria, L.E., Colombo, H., Perez-Molina, J.A., Wyss, F., Meeks, B., Bonilla, L.R., Gao, P., Wei, B., McCarthy, M., Yusuf, S., Morillo, C., Sosa-Estani, S., Waskin, H., Meeks, B., Yusuf, S., STOP-CHAGAS Investigators (2017). Benznidazole and Posaconazo…	Full text publication	2017-01-19	Dr. Carlos A. Morillo, Libin Cardiovascular Institute, University of Calgary, Population Health Research Institute-McMaster University, Foothills Medical Centre Room C8231403 29th Avenue NW, Calgary, Alberta T2N 2T9,Canada.;	carlos.morillo@ucalgary.ca; Carlos.Morillo@phri.ca	2	https://www.clinicaltrials.gov/ct2/show/NCT01377480?term=NCT01377480 (Trial Registration)	STOP-CHAGAS: Oral Posaconazole in the treatment of Asymptomatic Chronic Chagas Disease Supplementary Appendix and Protocol						Unknown			6	Checked	Unchecked	Unchecked	The STOP-CHAGAS trial was conducted in 19 centres from 5 countries in Latin America and Spain (8 in Argentina, 1 in Chile, 3 in Colombia, 3 in Guatemala, 1 in Mexico, and 3 in Spain).	Argentina	- Instituto de Cardiologia de Corrientes J.F. Cabral, Corrientes - Instituto Nacional de Parasitologia 'Dr. Mario Fatala Chaben' ANLIS Dr. Carlos G. Malbran, Buenos Aires - Prevención Cardiovascular, Hospital San Bernardo, Salta -CEDIR, Rosario, Santa Fe - Sanatorio Nuestra Señora Del Rosario S.A. Centro De Investigaciones Clínicas Jujuy, San Salvador De Jujuy - Hospital Provincial del Centenario…		South America	High	Unchecked	Checked	Checked	Unchecked	Unchecked	Unchecked	Unchecked	Checked	Endemic	93	93	93	-1	Chile	Laboratory of Basic Clinical Parasitology, Faculty of Medicine, University of Chile, Santiago		South America	High	Unchecked	Checked
Morillo2017_2; STOP-CHAGAS	Study Arm	1
Morillo2017_2; STOP-CHAGAS	Study Arm	2
Morillo2017_2; STOP-CHAGAS	Study Arm	3
Morillo2017_2; STOP-CHAGAS	Study Arm	4
Moroni 2019			NCT01744405	Moroni, S., Marson, M.E., Moscatelli, G., Mastrantonio, G., Bisio, M., Gonzalez, N., Ballering, G., Altcheh, J., García-Bournissen, F., 2019. Negligible exposure to nifurtimox through breast milk during maternal treatment for Chagas Disease. PLOS Neglected Tropical Diseases 13, e0007647. https://doi.org/10.1371/journal.pntd.0007647	Full text publication	2019-08-15	Samanta Moroni Parasitology and Chagas Service, Buenos Aires Children´s Hospital "Dr. Ricardo Gutierrez", Multidisciplinary Institute for Research in Pediatric Diseases (IMIPP), Buenos Aires Argentina.	samantamoroni@yahoo.com.ar	0								Unknown			2	Unchecked	Checked	Unchecked	Ten women and their 10 babies were enrolled in the study	Argentina	Parasitology and Chagas Service, Buenos Aires Children's Hospital "Ricardo Gutierrez"	-34.594263, -58.411435	South America	Upper middle	Unchecked	Checked	Unchecked	Unchecked	Unchecked	Unchecked	Unchecked	Checked	Endemic	10	10	10	-1	Argentina	Parasitology and Chagas Service, Buenos Aires Children's Hospital "Ricardo Gutierrez"	-34.594263, -58.411435	South America	Upper middle	Unchecked	Checked
Moroni 2019	Study Arm	1
Munoz 2006			-99	Munoz, J.; Avila, E.; Alonso, D.; Trevino, B.; Gomez, I. Prat J.; Sanz, G.; Gascon, J. Clinical characteristics of patients infected with Trypanosoma cruzi. Enfermedades Emergentes 2006;8(SUPPL. 1):42-44	Full text publication	2006-01-15	Jose Muñoz Secció Medicina Tropical Centre de Salut Internacional Hospital Clínic. Rosselló, 132, 2º-2º 08036 Barcelona	E-mail: jmunozg@clinic.ub.es	0								Unknown			1	Unchecked	Unchecked	Unchecked		Spain	city of Barcelona	41.3851° N, 2.1734° E	Southern Europe	High	Unchecked	Checked	Unchecked	Unchecked	Unchecked	Checked	Unchecked	Unchecked	Non-endemic	31	31	24	-1						Unchecked	Unchecked
Munoz 2006	Study Arm	1
Munoz2013			-99	Munoz, C., Zulantay, I., Apt, W., Ortiz, S., Schijman, A., Bisio, M., Ferrada, V., Herrera, C., Martinez, G. and Solari, A. (2013). Evaluation of Nifurtimox Treatment of Chronic Chagas Disease by Means of Several Parasitological Methods. Antimicrobial Agents and Chemotherapy, 57(9), pp.4518-4523. doi:10.1128/AAC.00227-13	Full text publication	2013-07-08	Solari Aldo, Laboratorio de Biología Molecular de Parásitos, Programa de Biología Celular y Molecular, Instituto de Ciencias Biomédicas, Facultad de Medicina,Chile Universidad de Chile, Santiago,	asolari@med.uchile.cl	0								Unknown			1	Unchecked	Unchecked	Unchecked		Chile	Choapa province, IV Región, Chile	29°02=S and 32°16=S	South America	High	Unchecked	Checked	Unchecked	Unchecked	Checked	Checked	Unchecked	Unchecked	Endemic	21	21	21	-1						Unchecked	Unchecked
Munoz2013	Study Arm	1
Munoz 2019			-99	Muñoz, Gabriela, Camilo Vergara, Gabriela Martínez, Werner Apt, and Inés Zulantay. "Quantification of immunoglobulin G against Trypanosoma cruzi in individuals with chronic Chagas disease treated with nifurtimox and evaluated in prolonged follow-up." The Korean journal of parasitology 57, no. 1 (2019): 39.	Full text publication	2019-02-26	Ines Zulantay	izulanta@med.uchile.cl	1	Vergara C,Muñoz G,Martınez G,Apt W, Zulantay I (2019) Detection of Trypanosoma cruzi by PCR in adults with chronic Chagas disease treated with nifurtimox. PLoS ONE 14(8): e0221100. https://doi.org/10.1371/journal. pone.0221100							Unknown			1	Unchecked	Unchecked	Unchecked		Chile	urban and rural areas of the Provinces Choapa and Limar ́ı, Coquimbo Region, Chile, an endemic area located between 29 ̊ 02' and 32 ̊ 16' South latitude	-31.375293, -71.077705	South America	High	Unchecked	Unchecked	Unchecked	Checked	Checked	Checked	Unchecked	Unchecked	Endemic	200	200	200	-1						Unchecked	Unchecked
Munoz 2019	Study Arm	1
Munoz 2019	Study Arm	2
Murcia2016			-9	Murcia, L., Carrilero, B., Ferrer, F., Roig, M., Franco, F. and Segovia, M. (2016). Success of benznidazole chemotherapy in chronic Trypanosoma cruzi-infected patients with a sustained negative PCR result. European Journal of Clinical Microbiology & Infectious Diseases, 35(11), pp.1819-1827. doi: 10.1007/s10096-016-2733-6	Full text publication	2016-04-08	L. Murcia, 1. Unidad Regional de Medicina Tropical, Servicio de Microbiología, Hospital Clínico Universitario Virgen de la Arrixaca, IMIB-Arrixaca, Carretera Madrid-Cartagena sn,30120- El Palmar, Murcia, Spain 2. Departamento de Genética y Microbiología, Universidad de Murcia, Murcia, Spain	lauramur@um.es	2	Murcia, L., Carrilero, B., Munoz, M., Iborra, M. and Segovia, M. (2010). Usefulness of PCR for monitoring benznidazole response in patients with chronic Chagas' disease: a prospective study in a non-disease-endemic country. Journal of Antimicrobial Chemotherapy, 65(8), pp.1759-1764. doi: 10.1093/jac/dkq201	Carrilero, B., Murcia, L., Martinez-Lage, L. and Segovia, M. (2011). Side effects of benznidazole treatment in a cohort of patients with Chagas disease in non-endemic country. Revista Espanola de Quimioterapia, 24(3), pp.123-126.						Unknown			1	Unchecked	Unchecked	Unchecked		Spain	Unit of Tropical Medicine (UTM) of the Virgen de la Arrixaca Hospital in Murcia (Spain)	37°55'57.6"N 1°09'43.4"W	Southern Europe	High	Unchecked	Checked	Unchecked	Unchecked	Unchecked	Unchecked	Unchecked	Checked	Non-endemic	455	455	455	-1						Unchecked	Unchecked
Murcia2016	Study Arm	1
Murcia2017			-99	Murcia, L., Simón, M., Carrilero, B., Roig, M., Segovia, M., 2017. Treatment of Infected Women of Childbearing Age Prevents Congenital Trypanosoma cruzi Infection by Eliminating the Parasitemia Detected by PCR. J. Infect. Dis. 215, 1452-1458. https://doi.org/10.1093/infdis/jix087	Full text publication	2017-02-14	M. Segovia, MD, PhD, Unidad Regional de Medicina Tropical, Servicio de Microbiología, Hospital Universitario Virgen de la Arrixaca, Carretera Madrid-Cartagena s/n, 30120-El Palmar Murcia, Spain	(msegovia@um.es).	1	Murcia, L., Carrilero, B., Munoz-Davila, M.J., Thomas, M.C., López, M.C., Segovia, M., 2013. Risk Factors and Primary Prevention of Congenital Chagas Disease in a Nonendemic Country. Clin. Infect. Dis. 56, 496-502. https://doi.org/10.1093/cid/cis910							Unknown			3	Unchecked	Checked	Unchecked	Pregnant women seropositive for chagas ,and their infants and seropositive non pregnant women.	Spain	Unit of Tropical Medicine of the Hospital Virgen de la Arrixaca in Murcia (Spain)	37.932658, -1.162098	South America	High	Unchecked	Checked	Unchecked	Unchecked	Unchecked	Unchecked	Unchecked	Checked	Non-endemic	144	144	144	-1	Spain	Unit of Tropical Medicine of the Hospital Virgen de la Arrixaca in Murcia (Spain)	37.932658, -1.162098	South America	High	Unchecked	Checked
Murcia2017	Study Arm	1
Murcia2017	Study Arm	2
Murcia2017	Study Arm	3
Niborski2016			-99	Niborski, L.L., Grippo, V., Lafón, S.O., Levitus, G., García-Bournissen, F., Ramirez, J.C., Burgos, J.M., Bisio, M., Juiz, N.A., Ayala, V., Coppede, M., Herrera, V., López, C., Contreras, A., Gómez, K.A., Elean, J.C., Mujica, H.D., Schijman, A.G., Levin, M.J. and Longhi, S.A (2016). Serological based monitoring of a cohort of patients with chronic Chagas disease treated with benznidazole in a hig…	Full text publication	2016-06-15	Silvia A Longhi and Mariano J Levin, Instituto de Investigaciones en Ingeniería Genética y Biología Molecular, Consejo Nacional de Investigaciones Científicas y Tecnológicas, Buenos Aires, Argentina. Crescencia López, 3Centro Asistencial Cáritas Diocesana, Añatuya, Santiago del Estero, Argentina	longhi@dna.uba.ar	0								Unknown			1	Unchecked	Unchecked	Unchecked		Argentina	Añatuya, a city in the Province of Santiago del Estero, Argentina	28.4606° S, 62.8344° W	South America	High	Unchecked	Checked	Unchecked	Unchecked	Checked	Checked	Unchecked	Unchecked	Endemic	270	270	104	-1						Unchecked	Unchecked
Niborski2016	Study Arm	1
Oliviera 2010			-99	Oliveira, L. F. A.; Silva, V. J. D.; Lages-Silva, E.; Molina, R. J.; Fuzissaki, J.; Niederhaur, S.; Prata, A.; Correia, D. Heart rate variability in chronic�Chagas�patients�before and after�treatmentwith�benznidazole. Autonomic Neuroscience: Basic and Clinical 2010;158(1-2):118-122	Full text publication	2010-05-14	Dalmo Correia	Infectious Disease Division, Internal Medicine Department, Federal University of the Triangulo Mineiro, PO Box: 118, Uberaba, Minas Gerais, Brazil. Tel.: +55 34 3318 5254; fax: +55 34 3318 5279. E-mail address: dalmo@mednet.com.br (D. Correia).	0								Unknown			1	Unchecked	Unchecked	Unchecked		Brazil	Recruitment site unknown Study was conducted at: Federal University of the Triângulo Mineiro, Uberara, Minas Gerais, Brazil	-19.754878, -47.931167	South America	Upper middle	Unchecked	Unchecked	Unchecked	Checked	Unchecked	Unchecked	Unchecked	Checked	Endemic	45	45	-99	-1						Unchecked	Unchecked
Oliviera 2010	Study Arm	1
Oliviera 2010	Study Arm	2
Ortiz 2019			-99	Ortiz, J.V., Pereira, B.V.M., Couceiro, K. do N., Silva e Silva, M.R.H. da, Doria, S.S., Silva, P.R.L. da, Lira, E. da F. de, Guerra, M. das G.V.B., Guerra, J.A. de O., Ferreira, J.M.B.B., 2018. Cardiac Evaluation in the Acute Phase of Chagas' Disease with Post-Treatment Evolution in Patients Attended in the State of Amazonas, Brazil. Arquivos Brasileiros de Cardiologia. https://doi.org/10.5935/a…	Full text publication	2018-10-05	Jessica Vanina Ortiz Av. Pedro Teixeira, 25. Postal Code 69040-000, Manaus, AM - Brazil	E-mail: ortiz.jvm@gmail.com	0								Unknown			1	Unchecked	Unchecked	Unchecked		Brazil	Francisca Mendes University Hospital	-3.031666, -59.963157	South America	Upper middle	Unchecked	Checked	Unchecked	Unchecked	Unchecked	Unchecked	Unchecked	Checked	Endemic	63	63	-99	-1						Unchecked	Unchecked
Ortiz 2019	Study Arm	1
Perez-Anton 2018			-99	Pérez-Antón, E., Egui, A., Thomas, M.C., Puerta, C.J., González, J.M., Cuéllar, A., Segovia, M., López, M.C., 2018. Impact of benznidazole treatment on the functional response of Trypanosoma cruzi antigen-specific CD4+CD8+ T cells in chronic Chagas disease patients. PLOS Neglected Tropical Diseases 12, e0006480. https://doi.org/10.1371/journal.pntd.0006480	Full text publication	2018-05-11	Manuel Carlos Lopez Instituto de ParasitologõÂa y Biomedicina LoÂpez-Neyra, Consejo Superior de Investigaciones CientõÂficas;Granada, Spain,	mclopez@ipb.csic.es	0								Unknown			2	Unchecked	Checked	Unchecked	G1: Thirty-eight chronic Chagas disease patients (20 asymptomatic and 18 symptomatic) G2: twelve healthy controls were enrolled in this study	Spain	Hospital Virgen de la Arrixaca, Murcia, Spain	37.932492, -1.162065	Southern Europe	High	Unchecked	Checked	Unchecked	Unchecked	Unchecked	Unchecked	Unchecked	Checked	Non-endemic	38	38	38	-1	Unknown	Unknown - site of recruitment of healthy controls is note reported	-99			Unchecked	Unchecked
Perez-Anton 2018	Study Arm	1
Perez-Anton 2018	Study Arm	2
Perez-Ayala2011			-99	Pérez-Ayala, A., Pérez-Molina, J.A., Norman, F., Navarro, M., Monge-Maillo, B., Díaz-Menéndez, M., Peris-García, J., Flores, M., Cañavate, C., López-Vélez, R., 2011. Chagas disease in Latin American migrants: a Spanish challenge. Clin. Microbiol. Infect. 17, 1108-1113. https://doi.org/10.1111/j.1469-0691.2010.03423.x	Full text publication	2010-11-13	A. Perez-Ayala, Infectious DiseasesDepartment, Tropical Medicine and Clinical Parasitology, Ramo´n y Cajal Hospital, Carretera de Colmenar km 9,1, Madrid 28034, Spain	anpayala@hotmail.com	2	Perez-Molina, J., Sojo-Dorado, J., Norman, F., Monge-Maillo, B., D�az-Men�ndez, M., Albajar-Vi�as, P. and L�pez-V�lez, R. (2013). Nifurtimox therapy for Chagas disease does not cause hypersensitivity reactions in patients with such previous adverse reactions during benznidazole treatment. Acta Tropica, 127(2), pp.101-104. doi: 10.1016/j.actatropica.2013.04.003	Perez-Ayala, A., Perez-Molina, J. A., Norman, F., Monge-Maillo, B., Faro, M. V., & Lopez-Velez, R. (2011). Gastro-intestinal Chagas disease in migrants to Spain: Prevalence and methods for early diagnosis. Annals of Tropical Medicine and Parasitology, 105(1), 25-29. Retrieved from https://www.ncbi.nlm.nih.gov/pmc/articles/PMC4089794/pdf/atm-105-01-025.pdf. doi:http://dx.doi.org/10.1179/136485910X…						Unknown			1	Unchecked	Unchecked	Unchecked		Spain	Tropical Medicine Unit (TMU), Infectious Diseases Department, of the Ramón y Cajal Hospital in Madrid, Spain	40.487820, -3.694546	Southern Europe	High	Unchecked	Checked	Unchecked	Unchecked	Unchecked	Checked	Unchecked	Unchecked	Non-endemic	357	357	104	-1						Unchecked	Unchecked
Perez-Ayala2011	Study Arm	1
Perez-Mazliah2013			-99	Perez-Mazliah, D.E, Alvarez, M.G., Cooley, G., Lococo, B.E., Bertocchi, G., Petti, M., Albareda, M.C, Armenti, A.H, Tarleton, R.L, Laucella, S.A. and Viotti, R. (2012). Sequential combined treatment with allopurinol and benznidazole in the chronic phase of Trypanosoma cruzi infection: a pilot study. Journal of Antimicrobial Chemotherapy, 68(2), pp.424-437. doi:10.1093/jac/dks390	Full text publication	2012-10-26	S. A. Laucella, Instituto Nacional de Parasitologia 'Dr. Mario Fatala Chaben', Av. Paseo Colon 568, Buenos Aires (1063), Argentina;	slaucella@yahoo.com	0								Unknown			4	Unchecked	Checked	Unchecked	Fifteen chronically infected subjects (mean age+SD 31+6 years, range 21-42 years)were given the opportunity to participate in this pilot study of a sequential combined treatment with allopurinol and benznidazole. Seventeen untreated subjects (mean age+SD 36+12 years, range 21-58 years), 9 patients receiving benznidazole alone (mean age+SD 42+8 years, range 30-55 years) and 9 uninfected controls (…	Argentina	Chagas' Disease Section of Hospital Interzonal General de Agudos 'Eva Pero´n' (Buenos Aires, Argentina)	-34.8913,-58.0073	South America	High	Unchecked	Checked	Unchecked	Unchecked	Unchecked	Checked	Unchecked	Unchecked	Endemic	15	15	-99	-1	Argentina	Chagas' Disease Section of Hospital Interzonal General de Agudos 'Eva Pero´n' (Buenos Aires, Argentina)	-34.8913,-58.0073	South America	High	Unchecked	Checked
Perez-Mazliah2013	Study Arm	1
Perez-Mazliah2013	Study Arm	2
Perez-Mazliah2013	Study Arm	3
Perez-Mazliah2013	Study Arm	4
Pinazo 2010			-99	Pinazo, M.-J., Munoz, J., Posada, E., Lopez-Chejade, P., Gallego, M., Ayala, E., del Cacho, E., Soy, D., Gascon, J., 2010. Tolerance of Benznidazole in Treatment of Chagas' Disease in Adults. Antimicrob. Agents Chemother. 54, 4896-4899. https://doi.org/10.1128/AAC.00537-10	Full text publication	2010-09-07	Gascon Joaquim, Tropical Diseases Section, Barcelona Centre for International Health Research (CRESIB), Hospital Clinic, Villarroel 170, 08036 Barcelona, Spain. Phone: 34932275400, ext. 2182. Fax: 34 932279853	mpinazo@clinic.ub.es.	0								Unknown			1	Unchecked	Unchecked	Unchecked		Spain	Center for International Health, in the Hospital Clinic, a university hospital in the center of Barcelona.	41.391452, 2.152593	Southern Europe	High	Unchecked	Checked	Unchecked	Unchecked	Unchecked	Unchecked	Unchecked	Checked	Non-endemic	105	105	89	-1						Unchecked	Unchecked
Pinazo 2010	Study Arm	1
Pinazo 2013			-99	Pinazo, M. J., Guerrero, L., Posada, E., Rodriguez, E., Soy, D., & Gascon, J. (2013). Benznidazole-related adverse drug reactions and their relationship to serum drug concentrations in patients with chronic chagas disease. Antimicrobial Agents and Chemotherapy, 57(1), 390-395. Retrieved from https://www.ncbi.nlm.nih.gov/pmc/articles/PMC3535922/pdf/zac390.pdf. doi:http://dx.doi.org/10.1128/AAC.014…	Full text publication	2012-10-13	María-Jesús Pinazo, Spain Barcelona Centre for International Health Research (CRESIB), Hospital Clínic-Universitat de Barcelona, Barcelona,	mariajesus.pinazo@cresib.cat.	1	Guerrero L, Pinazo MJ, Posada E, Gascon J, Ribas J, Soy D. 2011. A high-performance liquid chromatographic method for benznidazole quantitation in plasma of patients with Chagas disease. Clin. Chem. Lab.Med. 49:77- 82.							Unknown			1	Unchecked	Unchecked	Unchecked		Spain	Centre for International Health at Hospital Clínic, a university hospital, in Barcelona, Spain	41.389708, 2.152307	Southern Europe	High	Unchecked	Checked	Unchecked	Unchecked	Unchecked	Unchecked	Unchecked	Checked	Non-endemic	54	54	43	-1						Unchecked	Unchecked
Pinazo 2013	Study Arm	1
Pinazo2016			-99	Pinazo, M.J., Posada, EdJ., Izquierdo, L., Tassies, D., Marques, A.F., de Lazzari, E., Aldasoro, E., Muñoz, J., Abras, A., Tebar, S., Gallego, M., de Almeida, I.C, Reverter, J.C. and Gascon, J. (2016). Altered Hypercoagulability Factors in Patients with Chronic Chagas Disease: Potential Biomarkers of Therapeutic Response. PLOS Neglected Tropical Diseases, 10(1): e0004269. doi:10.1371/journal.pntd…	Full text publication	2016-01-04	Maria-Jesus Pinazo, ISGlobal, Barcelona Centre for International Health Research (CRESIB), Hospital Clínic- Universitat de Barcelona, Barcelona, Spain,	mariajesus.pinazo@isglobal.org	1	Pinazo MJ, Tassies D, Muñoz J, Fisa R, Posada E de J, Monteagudo J, et al. Hypercoagulability biomarkers in Trypanosoma cruzi-infected patients. Thromb Haemost 2011; 106(4): 617-623. doi: 10.1160/TH11-04-0251							Unknown			2	Unchecked	Checked	Unchecked	Ninety-nine individuals from Chagas disease-endemic areas were classified in two groups: G1, with T.cruzi infection (n = 56); G2, healthy individuals (n = 43).	Spain	Centre for International Health, Hospital Clínic in Barcelona, Spain.	41.3887° N, 2.1510° E	Southern Europe	High	Unchecked	Checked	Unchecked	Unchecked	Unchecked	Checked	Unchecked	Unchecked	Non-endemic	99	56	45	-1	Spain	Centre for International Health, Hospital Clínic in Barcelona, Spain.	41.3887° N, 2.1510° E	Southern Europe	High	Unchecked	Checked
Pinazo2016	Study Arm	1
Pontes 2010			-99	Pontes, V. M.O., Júnior, A.S.S., Cruz, F. M. Tavares., Coelho, H. L. L., Dias, A. T. N., Oliveira., Coelho, I. C. B. and Oliveira,M. F. Adverse reactions in Chagas disease patients treated with benznidazole, Revista da Sociedade Brasileira de Medicina Tropical 43(2):182-187.	Full text publication	2009-04-01	Profa Maria de Fátima Oliveira. Laboratório de pesquisa em doença de Chagas/Depto de Análises Clínicas e Toxicológicas/DACT/UFC. R. Capitão Francisco Pedro 1210, Rodolfo Teófilo, 60430-370 Fortaleza, CE.	fatimaufc@hotmail.com	0								Unknown			1	Unchecked	Unchecked	Unchecked		Brazil	Cardiology Outpatient Clinic of Walter Cantídio University Hospital, Federal University of Ceará.	3.7418° S, 38.5387° W	South America	Upper middle	Unchecked	Checked	Unchecked	Unchecked	Checked	Checked	Unchecked	Unchecked	Endemic	32	32	24	-1						Unchecked	Unchecked
Pontes 2010	Study Arm	1
Pupulin 2003			-99	Pupulin, A. R. T., Araújo, S. M., Gomes, M. L., Silva, S. V. d., & Carrashi, I. A. (2003). Acompanhamento domiciliar de pacientes chagásicos tratados etiologicamente. Rev. bras. anal. clin, 35(3), 159-161.	Full text publication	2003-08-30	Prof. Aurea Regina Telles Pupulin, Universidade Estadual de Maringa, DAC - Parasitologia Basica. Av. Colombo, 5790-87020.900- Maringa-PR	Unknown	0								Unknown			1	Unchecked	Unchecked	Unchecked		Brazil	Chagas Parasitology Basic Laboratory - Dac-UEM. Universidade Estadual de Maringá	-23.404479, -51.940668	South America	Upper middle	Unchecked	Checked	Unchecked	Unchecked	Unchecked	Unchecked	Unchecked	Checked	Endemic	51	51	-99	-1						Unchecked	Unchecked
Pupulin 2003	Study Arm	1
Rassi1999			-99	Rassi, A., Neto, V.A., Vicente; Ferraz de Siqueira, A., Filho, F.F., Amato, V.S and Junior.A.R.Protective effect of benznidazole against parasite reactivation in patients chronically infected by Trypanosoma cruzi and treated with corticosteroids because of associated conditions . Rev Soc Bras Med Trop 1999;32(5):475-82	Full text publication	1999-01-15	Anis Rassi, Departamento de Clínica Médica da Faculdade de Medicina da Universidade Federal de Goiás, Goiânia, GO. Av. A nº 333, Setor Oeste, 74110-020 Goiânia, GO, Brazil	Unknown	0								Unknown			1	Unchecked	Unchecked	Unchecked		Brazil	Hospital das Clínicas, Faculdade de Medicina of the Federal University of Goiás, of Tropical Diseases Anuar Auad or in the Hospital São Salvador, all based in Goiânia	16.6869° S, 49.2648° W	South America	Upper middle	Unchecked	Checked	Unchecked	Unchecked	Unchecked	Checked	Unchecked	Unchecked	Endemic	18	18	18	-1						Unchecked	Unchecked
Rassi1999	Study Arm	1
Rassi1999	Study Arm	2
Rassi 2000			-99	Rassi, A., Amato, N. V., Rassi, G. G., Filho, F.F., & Amato, V. S. (2000). An attempt of specific treatment by means of ticlopidine of patients with chronic phase of Chagas disease. Rev Soc Bras Med Trop, 33(2), 225-226. Retrieved from http://www.scielo.br/pdf/rsbmt/v33n2/v33n2a12.pdf.	Full text publication	2000-03-15	Dr. Anis Rassi. Av. A 333, Setor Oeste, 74110-020 Goiânia, GO, Brasil.	Fax: 55 62 281-8097.	0								Unknown			1	Unchecked	Unchecked	Unchecked		Unknown	Not reported	-99			Unchecked	Unchecked	Unchecked	Checked	Unchecked	Unchecked	Unchecked	Checked		12	12	12	-1						Unchecked	Unchecked
Rassi 2000	Study Arm	1
Rassi 2002			-99	Rassi, A., Neto, V.A., Ferraz de Siqueira, A., Filho, F.F., Amato, V. S., Rassi, G. G., & Rassi Junior, A. (2002). Treatment of chronic chaga's disease with an association of nifurtimox and corticoid . Rev Soc Bras Med Trop, 35(6), 547-550. Retrieved from http://www.scielo.br/pdf/rsbmt/v35n6/a01.pdf.	Full text publication	2002-11-15	Dr. Anis Rassi. Hospital São Salvador, Praça Vila Boa 333, 74110-020 Goiânia, GO.	Tel: 62 212-1044, Fax: 62 259-9839.	0								Unknown			1	Unchecked	Unchecked	Unchecked		Unknown	Unknown	-99			Unchecked	Unchecked	Unchecked	Checked	Unchecked	Unchecked	Unchecked	Checked		10	10	9	-1						Unchecked	Unchecked
Rassi 2002	Study Arm	1
Rassi2007			-99	Rassi, A., Luquetti, A.O., Rassi JR, A., Rassi, G.G., Rassi, S.G, Da Silva, I.G., Rassi, A.G. (2007). Short report: Specific treatment for Trypanosoma cruzi: Lack of efficacy of allopurinol in the human chronic phase of Chagas disease. American Journal Of Tropical Medicine And Hygiene, 76(1), pp.58-61.	Full text publication	2006-09-30	Anis Rassi, Laboratório de Pesquisa da Doença de Chagas, Faculdade de Medicina, Universidade Federal de Goiás, Caixa Postal 1.031, 74001-970 Goiânia, Brazil.	aluquetti@hotmail.com;	0								Unknown			1	Unchecked	Unchecked	Unchecked		Brazil	Hospital São Salvador	-16.587596, 75380-000	South America	Upper middle	Unchecked	Checked	Unchecked	Unchecked	Unchecked	Unchecked	Unchecked	Checked	Endemic	35	35	27	-1						Unchecked	Unchecked
Rassi2007	Study Arm	1
Rassi2007	Study Arm	2
Ribeiro 2010			-99	Ribeiro, C. M.; Budni, P.; Pedrosa, R. C.; Farias, M. S.; Parisotto, E. B.; Dalmarco, E. M.; Frode, T. S.; Oliveira-Silva, D.; Colepicolo, P.; Filho, D. W. Antioxidant therapy attenuates oxidative insult caused by benzonidazole in chronic Chagas' heart disease. International Journal of Cardiology 2010;145(1):27-33	Full text publication	2010-07-21	Danilo Wilhelm Filho, Departamento de Ecologia e Zoologia, Universidade Federal de Santa Catarina, Florianópolis, Brazil.	Tel.: +55 48 37216917; fax: +55 48 37215156. E-mail address: dawifi@ccb.ufsc.br (D.W. Filho).	2	Oliveira TB, Pedrosa RC, Wilhelm Filho D. Oxidative stress in chronic cardiopathy associated with Chagas' disease. Int J Cardiol 2007;116:357-63.	Maçao LB, Wilhelm Filho D, Pedrosa RC, et al. Antioxidant therapy attenuates oxidative stress in chronic cardiopathy associated with Chagas' disease. Int J Cardiol 2007;123:43-9						Unknown			4	Unchecked	Checked	Unchecked	Patients were grouped according to the clinical hemodynamic modified classification of Los Andes, which is based on electrocardiographic, echocardiographic (M-mode and two-dimensional echocardiogram with intracavitary Doppler), and physical examination findings.	Brazil	Hospital Universitário Clementino Fraga Filho - R. Prof. Rodolpho Paulo Rocco, 255 - Ilha do Fundão, Rio de Janeiro - RJ, 21941-913, Brazil	-15.801474, -47.935146	South America	Upper middle	Unchecked	Checked	Unchecked	Unchecked	Unchecked	Unchecked	Unchecked	Checked	Endemic	10	10	10	-1	Brazil	Hospital Universitário Clementino Fraga Filho - R. Prof. Rodolpho Paulo Rocco, 255 - Ilha do Fundão, Rio de Janeiro - RJ, 21941-913, Brazil	-15.801474, -47.935146	South America	Upper middle	Unchecked	Checked
Ribeiro 2010	Study Arm	1
Robello 2019			-99	Robello, C., Maldonado, D.P., Hevia, A., Hoashi, M., Frattaroli, P., Montacutti, V., Heguy, A., Dolgalev, I., Mojica, M., Iraola, G., Dominguez-Bello, M.G., 2019. The fecal, oral, and skin microbiota of children with Chagas disease treated with benznidazole. PLOS ONE 14, e0212593. https://doi.org/10.1371/journal.pone.0212593.	Full text publication	2019-02-26	Maria Domniguez-Bello; Carlos Robello. Institut Pasteur de Montevideo, Montevideo, Uruguay, Facultad de Medicina, Universidad de la Republica, Montevideo, Uruguay. Division of Translational Medicine, New York University School of Medicine, New York, NY, United States of America, Genome Technology Center, New York University Langone Medical Center, New York, NY, United States of America	mg.dominguez-bello@rutgers.edu (MGDB); robello@pasteur.edu.uy (CR)	0								Unknown			1	Unchecked	Unchecked	Unchecked		Bolivia	School in the Bolivian Qetchua town of Tarabuco, 63 Km SE of Sucre.	-19.039728, -65.255734	Central America	Lower middle	Checked	Unchecked	Unchecked	Unchecked	Unchecked	Unchecked	Unchecked	Checked	Endemic	55	20	20	-1						Unchecked	Unchecked
Robello 2019	Study Arm	1
Robello 2019	Study Arm	2
Ruiz Lancheros 2018			-99	Ruiz-Lancheros, E., Rasoolizadeh, A., Chatelain, E., Garcia-Bournissen, F., Moroni, S., Moscatelli, G., Altcheh, J., Ndao, M., 2018. Validation of Apolipoprotein A-1 and Fibronectin Fragments as Markers of Parasitological Cure for Congenital Chagas Disease in Children Treated With Benznidazole. Open Forum Infectious Diseases 5. https://doi.org/10.1093/ofid/ofy236	Full text publication	2018-11-04	Momar Ndao Research Institute of the McGill University Health Center, EM3-3244, 1001 Décarie Blvd, Montréal, QC, H4A 3J1, Canada	momar.ndao@ mcgill.ca.	1	Ruiz-Lancheros, E., et al. (2017). "Surrogate markers of cure for chagas disease in children treated with benznidazole disease." American Journal of Tropical Medicine and Hygiene 97 (5 Supplement 1): 385-386.							Unknown			1	Unchecked	Unchecked	Unchecked		Argentina	Hospital de Niños Ricardo Gutierrez, Buenos Aires, Argentina	-34.594218, -58.411446	South America	Upper middle	Unchecked	Checked	Unchecked	Unchecked	Unchecked	Unchecked	Unchecked	Checked	Endemic	60	30	30	-1						Unchecked	Unchecked
Ruiz Lancheros 2018	Study Arm	1
Ruiz Lancheros 2018	Study Arm	2
Salvador2015			-99	Salvador, F., S�nchez-Montalv�, A., Mart�nez-Gallo, M., Sala-Cunill, A., Vi�as, L., Garc�a-Prat, M., Aparicio, G., Sao Avil�s, A., Artaza, M., Ferrer, B. and Molina, I. (2015). Evaluation of Cytokine Profile and HLA Association in Benznidazole Related Cutaneous Reactions in Patients With Chagas Disease. Clinical Infectious Diseases, p.civ690. doi: 10.1093/cid/civ690	Full text publication	2015-11-08	Fernando Salvador, MD, Infectious Diseases Department, Vall d'Hebron University Hospital, P� Vall d'Hebron 119-129, 08035 Barcelona, Spain	fmsalvad@vhebron.net	2	Salvador2015_supplementary data	conference poster: Salvador, F., Sanchez-Montalva, A., Martinez-Gallo, M., Sala-Cunill, A., Vinas, L., Garcia-Prat, M., Aparicio, G., Sao Aviles, A., Artaza, M. and Molina, I. (2015). Evaluation of cytokine profile in benznidazole related cutaneous reaction, and potential association with specific HLA alleles and drug concentration in serum. Tropical Medicine and International Health, 20, pp.329-…						Unknown			1	Unchecked	Unchecked	Unchecked		Spain	Department of Infectious Diseases of the Vall d'Hebron University Hospital, a tertiary hospital included in the International Health Program of the Catalan Health Institute (PROSICS Barcelona, Spain).	41.428243, 2.141862	Southern Europe	High	Unchecked	Checked	Unchecked	Unchecked	Unchecked	Checked	Unchecked	Unchecked	Non-endemic	53	53	52	54 patients were included, two patients were withdrawn from the analysis: one patient was lost to follow-up before starting treatment, one patient stopped treatment after 10 days by its own decision and without presenting adverse events.						Unchecked	Unchecked
Salvador2015	Study Arm	1
Sanchez 2016			-99	Sanchez, A. G.; Alvarellos, E.; Kohout, I.; Rodriguez Schulz, D. G.; Cordeiro, E.; Caeiro, J. P.; Alvarellos, T. (2016) Detection of Trypanosoma cruzi and Treatment Monitoring by PCR from Dried Blood Spot Samples in Children. Revista de la Facultad de Ciencias Medicas (Cordoba, Argentina) 73(3):176-180.	Full text publication	2016-01-15	Ariel German Sánchez, Laboratorio de Biología Molecular e Histocompatibilidad. Hospital Privado Universitario de Córdoba. Córdoba. Argentina.	agsanchez78@outlook.com	0								Unknown			1	Unchecked	Unchecked	Unchecked		Argentina	rural school of a Toba community located in area number 60 of San Martin Department, Chaco province	27.4257° S, 59.0244° W	South America	High	Checked	Unchecked	Unchecked	Unchecked	Checked	Unchecked	Unchecked	Unchecked	Endemic	78	34	28	-1						Unchecked	Unchecked
Sanchez 2016	Study Arm	1
Sanchez Negrette2008			-99	Negrette, O.S, Sanchez ,V. F.J, Lacunza, C., Garcia B. M.F, Mora, M.C, Uncos, A.D and Basombrio, M.A (2007). Serological Evaluation of Specific-Antibody Levels in Patients Treated for Chronic Chagas' Disease. Clinical and Vaccine Immunology, 15(2), pp.297-302. doi: 10.1128/CVI.00106-07	Full text publication	2007-05-12	Olga Sanchez Negrette, Instituto de Patología Experimental, Facultad de Ciencias de la Salud, Universidad Nacional de Salta, calle Buenos Aires 177, 4400 Salta, Argentina. Phone and fax:54-387-4255333	olgasanette@yahoo.com.ar	1	Supplementary material is available at: http://cvi.asm.org/content/15/2/297/suppl/DC1							Unknown			1	Unchecked	Unchecked	Unchecked		Argentina	Unknown	-99	South America	High	Unchecked	Unchecked	Unchecked	Checked	Unchecked	Unchecked	Unchecked	Checked	Endemic	18	18	18	-1						Unchecked	Unchecked
Sanchez Negrette2008	Study Arm	1
Sartor2017			-99	Sartor, P., Colaianni, I., Cardinal, M., Bua, J., Freilij, H. and G�rtler, R. (2017). Improving access to Chagas disease diagnosis and etiologic treatment in remote rural communities of the Argentine Chaco through strengthened primary health care and broad social participation. PLOS Neglected Tropical Diseases, 11(2), p.e0005336. doi: 10.1371/journal.pntd.0005336	Full text publication	2017-02-13	Ricardo E. G�rtler, Universidad de Buenos Aires, Consejo Nacional de Investigaciones Cient�ficas y T�cnicas, Instituto de Ecolog�a, Gen�tica y Evoluci�n de Buenos Aires (IEGEBA), Facultad de Ciencias Exactas y Naturales, Buenos Aires, Argentina	gurtler@ege.fcen.uba.ar	1	supporting information: - S1 Table. Strengths, opportunities and threats identified in participatory workshops including community, health and research personnel. - S2 Table. Roles assumed by participants across the various phases of the intervention program. - S3 Table. Individual patient data including serodiagnosis, treatment, adverse reactions, and PCR outcomes. S1 Text. TREND statement check…							Unknown			1	Unchecked	Unchecked	Unchecked		Argentina	Pampa del Indio , Chaco, Argentina. The study area included 353 houses and a few public buildings grouped in 13 rural villages distributed over a 450 km2 section. The study area was inhabited by 1,187 people in 2007 (1,318 people as of 2012, including 565 up to 18 years of age), most of which lived on a subsistence economy.	-26.047462, -59.941576	South America	Upper middle	Checked	Checked	Unchecked	Unchecked	Checked	Unchecked	Unchecked	Unchecked	Endemic	78	78	58	78 eligible patients initiated treatment with benznidazole, 66 participants completed treatment, 58 patients provided at least 1 follow-up sample posttreatment.						Unchecked	Unchecked
Sartor2017	Study Arm	1
Sartori 2007			-99	Sartori, A.M.C., Ibrahim, K.Y., Nunes Westphalen, E.V., Braz, L.M.A., Oliveira, O.C., Gakiya, é, Lopes, M.H., Shikanai-Yasuda, M.A., 2007. Manifestations of Chagas disease (American trypanosomiasis) in patients with HIV/AIDS. Ann. Trop. Med. Parasitol. 101, 31-50. https://doi.org/10.1179/136485907X154629	Full text publication	2007-07-02	A. M. C. SARTOR, AIDS Clinic and Clinic of Infectious and Parasitic Diseases, Hospital das Clinicas, University of Sao Paulo School of Medicine, Rua Frei Caneca 557, Sao Paulo, SP, 01307 001, Brazil.	anasartori@gmail.com	6	Sartori, A. M. C., Lopes, M. H., Caramelli, B., Duarte, M. I. S., Pinto, P. L. S., Amato Neto, V. & Shikanai- Yasuda, M. A. (1995). Simultaneous occurrence of acute myocarditis and reactivated Chagas' disease in a patient with AIDS. Clinical Infectious Diseases, 21, 1297-1299.	Sartori, A. M. C., Lopes, M. H., Benvenuto, L. A., Caramelli, B., Di Pietro, A. O., Nunes, E. V., Ramirez, L. P. & Shikanai-Yasuda, M. A. (1998a). Reactivation of Chagas disease in a human immu nodeficiency virus-infected patient leading to severe heart disease with a late positive direct microscopic examination of the blood. American Journal of Tropical Medicine and Hygiene, 59, 784-786.	Sartori, A. M. C., Shikanai-Yasuda, M. A., Amato Neto, V. & Lopes, M. H. (1998b). Follow-up of 18 patients with human immunodeficiency virus infec tion and chronic Chagas disease, with reactivation of Chagas disease causing cardiac disease in three patients. Clinical Infectious Diseases, 26, 177-179.	Sartori, A. M. C., Sotto, M. N., Braz, L. M. A., Oliveira Jr, O. C., Patzina, R. A., Barone, A. A. & Shikanai-Yasuda,M.A. (1999). Reactivation of Chagas disease manifested by skin lesions in a patient with AIDS. Transactions of the Royal Society of Tropical Medicine and Hygiene, 93, 631-632.	Sartori, A. M. C., Caiaffa-Filho, H. H., Bezerra, R. C., Guilherme, C. S., Lopes, M. H. & Shikanai-Yasuda, M. A. (2002a). Exacerbation of HIV viral load simultaneous with asymptomatic reactivation of chronic Chagas' disease. American Journal of Tropical Medicine and Hygiene, 67, 521-523.	Sartori, A. M. C., Eluf Neto, J., Nunes, E. V., Braz, L. M. A., Caiaffa-Filho, H. H., Oliveira Jr, O. C., Amato Neto, V. & Shikanai-Yasuda, M. A. (2002b). Trypanosoma cruzi parasitemia in chronic Chagas disease: comparison between human immuno deficiency virus (HIV)-positive and HIV-negative patients. Journal of Infectious Diseases, 186, 872- 875.		Unknown			1	Unchecked	Unchecked	Unchecked		Brazil	AIDS Clinic and Clinic of Infectious and Parasitic Diseases of the Hospital das Clinicas, a large teaching hospital attached to School of Medicine of the University of Sao Paulo, in Sao Paulo, Brazil.	-23.554579, -46.670267	South America	Upper middle	Unchecked	Checked	Unchecked	Unchecked	Unchecked	Checked	Unchecked	Unchecked	Endemic	53	53	45	total number of study participants minus number of participants who died and/or were LTFU before 3 months						Unchecked	Unchecked
Sartori 2007	Study Arm	1
Schijman2003			-99	Schijman, A., Altcheh, J., Burgos, J., Biancardi, M., Bisio, M., Levin, M. and Freilij, H. (2003). Aetiological treatment of congenital Chagas' disease diagnosed and monitored by the polymerase chain reaction. Journal of Antimicrobial Chemotherapy, 52(3), pp.441-449. doi: 10.1093/jac/dkg338	Full text publication	2003-08-13	Alejandro G. Schijman, Vuelta de Obligado 2490, Second Floor, Buenos Aires, zip 1428, Argentina	schijman@dna.uba.ar	0								Unknown			1	Unchecked	Unchecked	Unchecked		Argentina	Parasitology Laboratory of Ricardo Guti�rrez Children's Hospital, a tertiary care paediatric referral centre for diagnosis of Chagas' disease without maternity service.	-34.594059, -58.411489	South America	Upper middle	Unchecked	Checked	Unchecked	Unchecked	Unchecked	Checked	Unchecked	Unchecked	Endemic	152	40	40	-1						Unchecked	Unchecked
Schijman2003	Study Arm	1
Silveira2000			-99	Silveira C.A.N., Castillo E., Castro C. (2000). Specific treatment evaluation for Trypanosoma cruzi in children in the evolution of the indeterminate phase. Revista da Sociedade Brasileira de Medicina Tropical 33(2):191-196. doi: 10.1590/S0037-86822000000200006	Full text publication	2000-04-15	Dr. Celeste A.N. Silveira. Nucleus of Tropical Medicine.	PO Box 4517, 70919-970 Brasília, DF.	1	Dissertation. Silveira, Can. Avaliação a longo prazo do tratamento específico da doença de chagas. PhD Thesis, Faculdade de Medicina, Universidade de Brasília, Distrito Federal 2000;():123pp							Unknown			1	Unchecked	Unchecked	Unchecked		Brazil	Mambaí, Goiás	-14.499197, -46.137704	South America	Upper middle	Unchecked	Unchecked	Unchecked	Checked	Unchecked	Unchecked	Unchecked	Checked	Endemic	12	12	12	-1						Unchecked	Unchecked
Silveira2000	Study Arm	1
Silveira2000	Study Arm	2
Simon 2019			-99	Simón, M., Gil-Gallardo, L.J., Asunción Iborra, M., Carrilero, B., López, M.C., Romay-Barja, M., Murcia, L., Carmen Thomas, M., Benito, A., Segovia, M., 2019. An observational longitudinal study to evaluate tools and strategies available for the diagnosis of Congenital Chagas Disease in a non-endemic country. Acta Tropica 199, 105127. https://doi.org/10.1016/j.actatropica.2019.105127	Full text publication	2019-08-05	Marina Simon. Unidad Regional de Medicina Tropical, Servicio de Microbiología, Hospital Universitario Virgen de la Arrixaca, Murcia, Spain	marina.simon@ffis.es	0								Unknown			1	Unchecked	Unchecked	Unchecked		Spain	Tropical Medicine Unit of Virgen de la Arrixaca Hospital in Murcia (Spain)	37.932677, -1.162508	Southern Europe	High	Unchecked	Checked	Unchecked	Unchecked	Unchecked	Unchecked	Unchecked	Checked	Non-endemic	342	173	12	-1						Unchecked	Unchecked
Simon 2019	Study Arm	1
Solari1998			-99	Solari, A., Contreras, M.C.C., Lorca, M., Garcia, A., Salinas, P., Ortiz, S., Soto A., Arancibia C. and Schenone H., (1998) Yielding of xenodiagnosis and PCR for the evaluation of specific chemotherapy of Chagas' disease in children]. Bol Chil Parasitol, 53, pp.27-29. PMID: 9830721	Full text publication	1998-01-15	Aldo Solari, Programa de Biologia celular y molecular instituto de ciencias biomedicas (ICBM). Facultad de Medicina, Universidad de Chile.	Unknown	-99								Unknown			2	Unchecked	Checked	Unchecked	Serologically positive and negative participants for Chagas disease.	Unknown	Unknown	-99			Unchecked	Unchecked	Unchecked	Checked	Unchecked	Unchecked	Unchecked	Checked		28	28	28	-1	Unknown	Unknown	-99			Unchecked	Unchecked
Solari1998	Study Arm	1
Solari2001			-99	Solari, A., Ort�z, S., Soto, A., Arancibia, C., Campillay, R., Contreras, M., Salinas, P., Rojas, A. and Schenone, H. (2001). Treatment of Trypanosoma cruzi-infected children with nifurtimox: a 3 year follow-up by PCR. Journal of Antimicrobial Chemotherapy, 48(4), pp.515-519. doi: 10.1093/jac/48.4.515	Full text publication	2001-09-15	A. Solari, Biomedical Sciences Institute, Faculty of Medicine, University of Chile, Castilla 70086, Santiago 7, Chile	asolari@machi.med.uchile.cl	0								Unknown			1	Unchecked	Unchecked	Unchecked		Chile	Chile region III, 27 degrees S, and V region and Metropolitan region, 33 degrees S.	-32.311383, -71.075653	South America	High	Unchecked	Checked	Checked	Unchecked	Unchecked	Checked	Unchecked	Unchecked	Endemic	66	66	56	The average number of samples studied was 56. some samples were lost during field work, particularly on the last period of follow-up						Unchecked	Unchecked
Solari2001	Study Arm	1
SosaEstani1998			-99	Sosa Estani, S., Porcel, B., Segura, E., Yampotis, C., Ruiz, A. and Velazquez, E. (1998). Efficacy of chemotherapy with benznidazole in children in the indeterminate phase of Chagas' disease.�The American Journal of Tropical Medicine and Hygiene, 59(4), pp.526-529. doi: 10.4269/ajtmh.1998.59.526	Full text publication	1998-01-15	Sergio Sosa Estani, Centro Nacional de Diagnostico e Investigacion de Endemo-Epidemias/Administracion Nacional de Laboratorios e Institutos de Salud (ANLIS) Dr. Carlos G. Malbran, Av. Paseo Colon 568, CP 1063, Buenos Aires, Argentina.	ssosa@msal.gov.ar	2	Sosa-Estani, S., Cura, E., Velazquez, E., Yampotis, C. and Segura, E. (2009). Etiological treatment of young women infected with Trypanosoma cruzi, and prevention of congenital transmission. Revista da Sociedade Brasileira de Medicina Tropical, 42(5), pp.484-487. doi: 10.1590/s0037-86822009000500002	Laucella, Segura, Riarte and Sosa, E. (1999). Soluble platelet selectin (sP-selectin) and soluble vascular cell adhesion molecule-1 (sVCAM-1) decrease during therapy with benznidazole in children with indeterminate form of Chagas' disease. Clinical and Experimental Immunology, 118(3), pp.423-427. doi: 10.1046/j.1365-2249.1999.01070.x						Unknown			1	Unchecked	Unchecked	Unchecked		Argentina	Province of Salta, Northwest Argentina	-24.782023, -65.422740	South America	Upper middle	Unchecked	Unchecked	Unchecked	Checked	Checked	Unchecked	Checked	Unchecked	Endemic	106	106	88	numbers from table 1 (n at 48 months, BZN plus placebo group)						Unchecked	Unchecked
SosaEstani1998	Study Arm	1
SosaEstani1998	Study Arm	2
Sosa Estani 2004			-99	Sosa-Estani, S., Armenti, A., Araujo, G., Viotti, R., Lococo, B., Ruiz Vera, B., Vigliano, C., de Rissio, A.M., Segura, E.L., 2004. [Treatment of Chagas disease with benznidazole and thioctic acid]. Medicina (Mex.) 64, 1-6.	Full text publication	2003-05-23	Dr. Sergio Sosa-Estani, CeNDIE, Av. Paseo Colón 568, 1063 Buenos Aires, Argentina.	ssosaestani@abaconet.com.ar	0								Unknown			3	Unchecked	Checked	Unchecked	The sample of incorporated patients was separated by each participating center in 3 age groups, considering the following intervals: 15-24; 25-34 and 35-44 years	Argentina	National Parasitology "Dr. Mario Fatala Chaben "de la Cdad. of Buenos Aires, of the Chagas Center of the Eva Perón Hospital and of 2 Primary Care Centers, depending on the latter, of the San Martín Party, Province of Buenos Aires.	-34.658690, -58.724085	South America	High	Unchecked	Checked	Unchecked	Unchecked	Unchecked	Checked	Unchecked	Unchecked	Endemic	83	83	83	-1	Argentina	National Parasitology "Dr. Mario Fatala Chaben "de la Cdad. of Buenos Aires, of the Chagas Center of the Eva Perón Hospital and of 2 Primary Care Centers, depending on the latter, of the San Martín Party, Province of Buenos Aires	-34.658690, -58.724085	South America	High	Unchecked	Checked
Sosa Estani 2004	Study Arm	1
Sosa Estani 2004	Study Arm	2
Sosa Estani 2004	Study Arm	3
Sosa Estani 2004	Study Arm	4
Soverow 2019			-99	Soverow, J., et al. (2019). "Progression of Baseline Electrocardiogram Abnormalities in Chagas Patients Undergoing Antitrypanosomal Treatment." Open Forum Infectious Diseases 6(2): ofz012.	Full text publication	2019-01-19	J. Soverow, MD, MPH Center of Excellence for Chagas Disease at Olive View-UCLA Medical Center, 14445 Olive View Dr., Sylmar, CA	(jsoverow@dhs.lacounty.gov).	0								Unknown			1	Unchecked	Unchecked	Unchecked		United States	Center of Excellence for Chagas Disease (CECD) at Olive View-UCLA Medical Center, Los Angeles	34.325992, -118.446160	Northern America	High	Unchecked	Checked	Unchecked	Unchecked	Unchecked	Unchecked	Unchecked	Checked	Non-endemic	89	89	89	-1						Unchecked	Unchecked
Soverow 2019	Study Arm	1
Soverow 2019	Study Arm	2
Soverow 2019	Study Arm	3
Soy2015; CINEBENZ			NCT01755403, Eudra-CT-2011-002900-34	Soy, D., Aldasoro, E., Guerrero, L., Posada, E., Serret, N., Mej�a, T., Urbina, J. and Gasc�n, J. (2015). Population Pharmacokinetics of Benznidazole in Adult Patients with Chagas Disease. Antimicrobial Agents and Chemotherapy, 59(6), pp.3342-3349. doi: 10.1128/AAC.05018-14.	Full text publication	2015-05-30	Pharmacy Service, Hospital Clinic Barcelona, Barcelona, Spaina; Institut de Investigaci� Biom�dica Agust� Pi i Sunyer (IDIBAPS), University of Barcelona, Barcelona, Spainb; CIBERES (CIBER de Enfermedades Respiratorias, 06/06/0028), Spainc�; International Health Service, D. Soy, Hospital Clinic Barcelona, Barcelona, Spaind; ISGlobal, Barcelona Center for International Health Research (CRESIB), Bar…	dsoy@clinic.ub.es.	0								Unknown			1	Unchecked	Unchecked	Unchecked		Spain	Tropical Medicine Unit in the Hospital Clinic of Barcelona	41.388664, 2.151119	Southern Europe	High	Unchecked	Checked	Unchecked	Unchecked	Unchecked	Unchecked	Unchecked	Checked	Non-endemic	51	51	49	-1						Unchecked	Unchecked
Soy2015; CINEBENZ	Study Arm	1
Sperandio da Silva 2017			-99	Sperandio da Silva, G.M., Felix Mediano, M.F., Hasslocher-Moreno, A.M., Holanda, M.T. de, Silvestre de Sousa, A., Sangenis, L.H.C., Brasil, P.E.A.A. do, Mejía, R.A., Fux, C.P., Cubides, J.-C., Saraiva, R.M., Brum-Soares, L.M., 2017. Benznidazole treatment safety: the Médecins Sans Frontières experience in a large cohort of Bolivian patients with Chagas' disease. J. Antimicrob. Chemother. 72, 2596…	Full text publication	2017-06-22	Gilberto Marcelo Sperandio da Silva, Evandro Chagas National Institute of Infectious Diseases (INI)-Oswaldo Cruz Foundation (Fiocruz), Manguinhos, Rio de Janeiro, Brazil;	gilbertomarcelo@gmail.com/gilberto.silva@ini.fiocruz.br	0								Unknown			1	Unchecked	Unchecked	Unchecked		Bolivia	Omereque Pasorapa Aiquile	18.1089° S, 64.9087° W, 18.3228° S, 64.6796° W, 18.2052° S, 65.1815° W,	South America	Lower middle	Unchecked	Unchecked	Unchecked	Checked	Checked	Checked	Unchecked	Unchecked	Endemic	2075	2075	1864	-1						Unchecked	Unchecked
Sperandio da Silva 2017	Study Arm	1
Streiger2004			-99	Streiger, M.L., del Barco, M.L., Fabbro, D.L., Arias, E.D., Amicone, N.A., 2004. [Longitudinal study and specific chemotherapy in children with chronic Chagas' disease, residing in a low endemicity area of Argentina]. Rev. Soc. Bras. Med. Trop. 37, 365-375. https://doi.org//S0037-86822004000500001	Full text publication	2004-08-05	Centro de Investigaciones sobre Endemias Nacionales, Facultad de Bioquímica y Ciencias Biológicas, Universidad Nacional del Litoral, Santa Fe, Argentina. Financiado por UNL para Proyectos CAI+D. araje El Pozo. Ciudad Universitaria, Casilla Postale 3000, Santa Fe, Argentina.	e-mail: streiger@fbcb.unl.edu.ar	0								Unknown			1	Unchecked	Unchecked	Unchecked		Argentina	Santa Fé	31.6107° S, 60.6973° W	South America	High	Checked	Unchecked	Checked	Unchecked	Unchecked	Checked	Unchecked	Unchecked	Endemic	95	95	63	-1						Unchecked	Unchecked
Streiger2004	Study Arm	1
Streiger2004	Study Arm	2
Streiger2004	Study Arm	3
Suarez 2005			-99	Suárez, E., Alonso-Vega, C., Torrico, F., 2005. tratamiento integral de la enfermedad de chagas congénito: la experienca boliviana. Rev. Soc. Bras. Med. Trop. 38, 3.	Full text publication	2005-01-15	Dr. Eduardo Suarez, Centro Universitario de Medicina Tropical, Facultad de Medecina, Universidad Mayor de San Simon (U.M.S.S.), Avenida Aniceto Arce 371, casilla 3023, Cochabamba, Bolivia.	esuarezba@yahoo.com	0								Unknown			1	Unchecked	Unchecked	Unchecked		Bolivia	Neonatology Service of Germán Urquidi Maternal and Child Hospital in the city of Cochabamba.	-17.397147, -66.162844	South America	Lower middle	Unchecked	Checked	Unchecked	Unchecked	Unchecked	Unchecked	Unchecked	Checked	Endemic	60	60	60	-1						Unchecked	Unchecked
Suarez 2005	Study Arm	1
Tornheim2013			-99	Tornheim, J., Lozano Beltran, D., Gilman, R., Castellon, M., Solano Mercado, M., Sullca, W., Torrico, F. and Bern, C. (2013). Improved Completion Rates and Characterization of Drug Reactions with an Intensive Chagas Disease Treatment Program in Rural Bolivia. PLoS Neglected Tropical Diseases, 7(9), p.e2407. doi:10.1371/journal.pntd.0002407	Full text publication	2013-09-19	Jeffrey A. Tornheim, Combined Internal Medicine/Pediatrics Residency Program, Yale School of Medicine, New Haven, Connecticut, United States of America	jeffrey.tornheim@yale.edu	0								Unknown			1	Unchecked	Unchecked	Unchecked		Bolivia	Hospital Dr. Manuel Ascencio Villarroel de Punata (Punata Hospital) is a rural government referral hospital with a catchment of circa 50,000 people, located some 45 minutes from Cochabamba, Bolivia's 3rd largest city.	-17.547099, -65.845171	South America	Lower middle	Unchecked	Checked	Unchecked	Unchecked	Checked	Unchecked	Unchecked	Unchecked	Endemic	162	162	162	-1						Unchecked	Unchecked
Tornheim2013	Study Arm	1
Torrico2017			NCT01489228	Torrico, F., Gascon, J., Ortiz, L., Alonso-Vega, C., Pinazo, M., Schijman, A., Almeida, I., Alves, F., Strub-Wourgaft, N., Ribeiro, I., Santina, G., Blum, B., Correia, E., Garcia-Bournisen, F., Vaillant, M., Morales, J., Pinto Rocha, J., Rojas Delgadillo, G., Magne Anzoleaga, H., Mendoza, N., Quechover, R., Caballero, M., Lozano Beltran, D., Zalabar, A., Rojas Panozo, L., Palacios Lopez, A., Torr…	Full text publication	2017-01-15	Dr Isabela Ribeiro, Drugs for Neglected Diseases initiative, 1202 Geneva, Switzerland	iribeiro@dndi.org	6	Torrico2017_supplementary material	Ramirez, J., Parrado, R., Villarroel, S., De La Barra, A., Rodriguez, M., Irazu, L., . . . Schijman, A. (2015). External quality control program for real-time PCR testing in a multi-centre, randomised controlled clinical trial in Chagas disease. Tropical Medicine and International Health, 20, 330-331. doi: 10.1111/tmi.12574	Ribeiro, I., Torrico, F., Gascon, J., Ortiz, L., Blum, B., Alves, F., Everson, M., Duncanson, F. and Garcia-Bounissen, F. (2015). Population pharmacokinetics of E1224, a prodrug of ravuconazole for the treatment of Chagas disease. Tropical Medicine and International Health, 20, pp.328. doi: 10.1111/tmi.12574	Torrico, F. Rationale and design of a proof-of-concept phase II clinical study of E1224, a new drug candidate for Chronic�Chagas�disease. Tropical Medicine and International Health 2011;16():21-22	Torrico, Faustino, Joaquim Gascon, Lourdes Ortiz, Cristina Alonso-Vega, María-Jesús Pinazo, Alejandro Schijman, Igor C. Almeida et al. "Treatment of adult chronic indeterminate Chagas disease with benznidazole and three E1224 dosing regimens: a proof-of-concept, randomised, placebo-controlled trial." The Lancet Infectious Diseases 18, no. 4 (2018): 419-430.	Parrado R, Ramirez JC, de la Barra A, Alonso-Vega C, Juiz N, Ortiz L, Illanes D, Torrico F, Gascon J, Alves F, Flevaud L, Garcia L, Schijman AG, Ribeiro I. 2019. Usefulness of serial blood sampling and PCR replicates for treatment monitoring of patients with chronic Chagas disease. Antimicrob Agents Chemother 63:e01191-18. https://doi.org/10.1128/AAC.01191-18.		Unknown			1	Unchecked	Unchecked	Unchecked		Bolivia	Two outpatient units in Bolivia (Cochabamba and Tarija).	17.4140° S, 66.1653° W;21.5178° S, 64.7296° W	South America	Lower middle	Unchecked	Checked	Unchecked	Unchecked	Unchecked	Checked	Unchecked	Unchecked	Endemic	231	231	229	-1						Unchecked	Unchecked
Torrico2017	Study Arm	1
Torrico2017	Study Arm	2
Torrico2017	Study Arm	3
Torrico2017	Study Arm	4
Torrico2017	Study Arm	5
Valente 2009			-99	Valente, S. A. d. S., da Costa Valente, V., das Neves Pinto, A. Y., de Jesus Barbosa Cesar, M., dos Santos, M. P., Miranda, C. O. S., .Fernandes, O. (2009). Analysis of an acute Chagas disease outbreak in the Brazilian Amazon: human cases, triatomines, reservoir mammals and parasites. Transactions of the Royal Society of Tropical Medicine and Hygiene, 103(3), 291-297.	Full text publication	2008-12-31	Rodovia BR 316, KM 7, S/N., CP 50, CEP 67.030-070 Ananindeua, Pará, Brazil.	Tel.: +55 913 214 2106. E-mail address: aldovalente@iec.pa.gov.br (S.A.d.S. Valente).	0								Unknown			4	Unchecked	Checked	Unchecked	The study included all the 26 inhabitants from the only four families living in the locality: A (eight members), B (six members), C (seven members) and D (five members).	Brazil	Rio Bispo, Mazagão municipality, Amapá State, Brazil	S 0041149, W 0513846.1	South America	Upper middle	Unchecked	Unchecked	Unchecked	Checked	Unchecked	Unchecked	Unchecked	Checked	Endemic	8	8	8	-1	Brazil	Rio Bispo, Mazagão municipality, Amapá State, Brazil	S 0041149, W 0513846.1	South America	Upper middle	Unchecked	Unchecked
Valente 2009	Study Arm	1
Valente 2009	Study Arm	2
Vallejo2016			Eudra-CT-2011-002022-41	Vallejo, A., Monge-Maillo, B., Guti�rrez, C., Norman, F., L�pez-V�lez, R. and P�rez-Molina, J. (2016). Changes in the immune response after treatment with benznidazole versus no treatment in patients with chronic indeterminate Chagas disease. Acta Tropica, 164, pp.117-124. doi: 10.1016/j.actatropica.2016.09.010	Full text publication	2016-09-09	Corresponding author: Alejandro Vallejo, Laboratory of Immunovirology. Infectious DiseasesDepartment, Hospital Universitario Ram�n y Cajal, Institute Ram�n y Cajal for HealthResearch (IRYCIS), Carretera de Colmenar Km 9,1, 28034 Madrid, Spain. Corresponding author: Jos� A. P�rez-Molina, Tropical Medicine CSUR. Infectious Diseases Depart-ment, Hospital Universitario Ram�n y Cajal, Institute Ram�n …	alejandro.vallejo@salud.madrid.org (A. Vallejo), jperezm@salud.madrid.org (J.A. P�rez-Molina).	1	Supplementary data: Vallejo2016_appendix							Unknown			1	Unchecked	Unchecked	Unchecked		Spain	Tropical Medicine Unit, Hospital Universitario Ram�n y Cajal, Madrid, Spain	40.487722, -3.694568	Southern Europe	High	Unchecked	Checked	Unchecked	Unchecked	Unchecked	Unchecked	Unchecked	Checked	Non-endemic	14	14	11	Supplementary Fig 1: 4 patients analysed in intervention group, 7 in untreated group.						Unchecked	Unchecked
Vallejo2016	Study Arm	1
Vallejo2016	Study Arm	2
Velasquez 2019			-99	Vásquez Velásquez, C., Russomando, G., Espínola, E.E., Sanchez, Z., Mochizuki, K., Roca, Y., Revollo, J., Guzman, A., Quiroga, B., Rios Morgan, S., Vargas Ortiz, R., Zambrana Ortega, A., Espinoza, E., Nishizawa, J.E., Kamel, M.G., Kikuchi, M., Mizukami, S., Na-Bangchang, K., Tien Huy, N., Hirayama, K., 2019. IL-17A, a possible biomarker for the evaluation of treatment response in Trypanosoma cruz…	Full text publication	2019-09-25	Kenji Hirayama, Department of Immunogenetics, Institute of Tropical Medicine (NEKKEN), School of Tropical Medicine and Global Health, Nagasaki University, Sakamoto, Nagasaki, Japan, Graduate School of Biomedical Sciences, Nagasaki University, Sakamoto, Nagasaki, Japan,	hiraken@nagasaki-u.ac.jp	0								Unknown			1	Unchecked	Unchecked	Unchecked		Bolivia	six regional health facilities: Warnes Municipal Hospital "Nuestra Señora del Rosario" (Warnes, Santa Cruz, Bolivia), Health care center Satelite Norte (Satelite Norte) in Warnes, Health care center "Villa de Cochabamba" in Montero (Montero), Portachuelo Hospital "San Jose Obrero" (Portachuelo), Health care center "18 de Marzo, Santa Cruz" (Santa Cruz), and Centro Nacional de Enfermedades Tropica…	17°30'24.1"S 63°10'01.7"W, -17.6028239,-63.1401007, 17°21'27.3"S 63°24'12.6"W, 17°46'43.5"S 63°11'38.3"W	South America	Lower middle	Unchecked	Checked	Unchecked	Unchecked	Unchecked	Unchecked	Unchecked	Checked	Endemic	103	103	73	-1						Unchecked	Unchecked
Velasquez 2019	Study Arm	1
Venegas 1997			-99	Venegas, J.; Zulantay, I.; Apt, W.; Solari, A.; Diaz, E.; Sanchez, G. Effect of itraconazole on lytic antibodies levels in chronic Chagas disease. Parasite (Paris, France) 1997;4(3):259-262.http://dx.doi.org/10.1051/parasite/1997043259	Full text publication	1997-05-15	Dr. Gittith Sánchez P, Departament of Bioche- mistry, North Campus, Faculty of Medicine, University of Chile, San- tiago-Chile, Independencia 1027 .	Fax : 56-2 (7355580).	0								Unknown			2	Unchecked	Checked	Unchecked	20 chronic chagasic persons from endemic areas of Chile were grouped according to the results of Xenodiagnosis performed before therapy. 10 of them showed positive XD (group A) and 10 of them negative XD (group B)	Chile	Distinct areas of Chile - not specified	-26.001412, -70.438364	South America	High	Unchecked	Unchecked	Unchecked	Checked	Unchecked	Unchecked	Unchecked	Checked	Endemic	10	10	10	-1	Chile	Distinct areas of Chile - not specified	-26.001412, -70.438364	South America	High	Unchecked	Unchecked
Venegas 1997	Study Arm	1
Vera de Bilbao2004			-99	Vera de Bilbao, N., Samudio, M., Schinini, A., Acosta, N., Lpez, E., Gonzlez, N., et al. (2004) Evaluacin a 24 meses post-tratamiento con benznidazol en nios de 6 a 12 aos infectados con Trypanosoma cruzi. Revista de Patologa Tropical, 33(3), pp.301-312.	Full text publication	2005-01-18	Ninfa Vera de Bilbao	nverabilbao@hotmail.com	0								Unknown			1	Unchecked	Unchecked	Unchecked		Paraguay	endemic prefect of Paraguay	-23.017435, -58.612264	South America	Upper middle	Unchecked	Unchecked	Unchecked	Checked	Unchecked	Unchecked	Unchecked	Checked	Endemic	20	20	20	-1						Unchecked	Unchecked
Vera de Bilbao2004	Study Arm	1
Viotti2006			-99	Viotti, R., Vigliano, C., Lococo, B., Bertocchi, G., Petti, M., Alvarez, M., Postan, M. and Armenti, A. (2006). Long-Term Cardiac Outcomes of Treating Chronic Chagas Disease with Benznidazole versus No Treatment.�Annals of Internal Medicine, 144(10), p.724. doi: 10.7326/0003-4819-144-10-200605160-00006	Full text publication	2006-05-16	Dr. Viotti: Jos� Hern�ndez 3440, Villa Ballester, Gral. San Mart�n, Buenos Aires ZC 1653, Argentina. Drs. Vigliano, Lococo, Bertocchi, Petti, Alvarez, and Armenti: Avenue Ricardo Balbin 900, San Mart�n, Buenos Aires ZC 1650, Argentina. Dr. Postan: Avenue Paseo Col�n 568, Buenos Aires ZC 1063, Argentina.	peron@millicom.com.ar	1	Viotti, R., Vigliano, C., Armenti, H. and Segura, E. (1994). Treatment of chronic Chagas' disease with benznidazole: Clinical and serologic evolution of patients with long-term follow-up. American Heart Journal, 127(1), pp.151-162. doi: 10.1016/0002-8703(94)90521-5							Unknown			1	Unchecked	Unchecked	Unchecked		Argentina	Chagas Disease Section at Hospital Eva Per�n, Buenos Aires	-34.571697, -58.554519	South America	Upper middle	Unchecked	Checked	Unchecked	Unchecked	Unchecked	Unchecked	Unchecked	Checked	Endemic	566	566	455	566 - 54 - 57 (lost to follow-up)						Unchecked	Unchecked
Viotti2006	Study Arm	1
Viotti2006	Study Arm	2
Viotti2011			-99	Viotti, R., Vigliano, C., �lvarez, M., Lococo, B., Petti, M., Bertocchi, G., Armenti, A., De Rissio, A., Cooley, G., Tarleton, R. and Laucella, S. (2011). Impact of Aetiological Treatment on Conventional and Multiplex Serology in Chronic Chagas Disease. PLoS Neglected Tropical Diseases, 5(9), p.e1314. doi: 10.1371/journal.pntd.0001314	Full text publication	2011-06-09	Rodolfo Viotti, Chagas Disease and Heart Failure Section, Cardiology Department, Hospital Eva Per�n, San Mart�n, Buenos Aires, Argentina	rviotti@arnet.com.ar	0								Unknown			1	Unchecked	Unchecked	Unchecked		Argentina	Health Care Section for Chagas disease at the Hospital Eva Per�n, Buenos Aires, Argentina	-34.668330, -58.721932	South America	Upper middle	Unchecked	Checked	Unchecked	Unchecked	Unchecked	Unchecked	Unchecked	Checked	Endemic	142	142	142	Minimum follow-up of 24 months is an inclusion criterion.						Unchecked	Unchecked
Viotti2011	Study Arm	1
Viotti2011	Study Arm	2
Wendling 2011			-99	Wendling, A.P.B., Vitelli-Avelar, D.M., Sathler-Avelar, R., Geiger, S.M., Teixeira-Carvalho, A., Gontijo, E.D., Elói-Santos, S.M., Martins-Filho, O.A., 2011. The use of IgG antibodies in conventional and non-conventional immunodiagnostic tests for early prognosis after treatment of Chagas disease. J. Immunol. Methods 370, 24-34. https://doi.org/10.1016/j.jim.2011.05.003	Full text publication	2011-05-17	Olindo Assis Martins-Filho, Laboratório de Biomarcadores de Diagnóstico e Monitoração, Centro de Pesquisas René Rachou, Avenida Augusto de Lima 1715, Barro Preto, Belo Horizonte, Minas Gerais 30.190-002, Brazil. Tel.+55 31 3349 7764; fax: +55 31 3295 3115.	oamfilho@cpqrr.fiocruz.br	0								Unknown			1	Unchecked	Unchecked	Unchecked		Brazil	Ambulatory of Chagas Disease at Hospital das Clínicas, Universidade Federal de Minas Gerais (UFMG), Belo Horizonte, Brazil	-19.924103, -43.928008	South America	Upper middle	Unchecked	Checked	Unchecked	Unchecked	Unchecked	Unchecked	Unchecked	Checked	Endemic	44	44	44	-1						Unchecked	Unchecked
Wendling 2011	Study Arm	1
Wendling 2011	Study Arm	2
Yun2009			-9	Yun, O., Lima, M., Ellman, T., Chambi, W., Castillo, S., Flevaud, L., Roddy, P., Parre�o, F., Albajar Vi�as, P. and Palma, P. (2009). Feasibility, Drug Safety, and Effectiveness of Etiological Treatment Programs for Chagas Disease in Honduras, Guatemala, and Bolivia: 10-Year Experience of M�decins Sans Fronti�res. PLoS Neglected Tropical Diseases, 3(7), p.e488. doi: 10.1371/journal.pntd.0000488	Full text publication	2009-07-07	M. Angeles Lima (and Josep Escriba), M�decins Sans Fronti�res, Operational Center Barcelona-Athens (OCBA), Barcelona, Spain	nines.lima@barcelona.msf.org Escriba: 22766jej@comb.cat	2	Escrib�, J., Ponce, E., Romero, A., Vi�as, P., Marchiol, A., Bassets, G., Palma, P., Lima, M., Z�niga, C. and Ponce, C. (2009). Treatment and seroconversion in a cohort of children suffering from recent chronic Chagas infection in Yoro, Honduras. Mem�rias do Instituto Oswaldo Cruz, 104(7), pp.986-991. doi: 10.1590/S0074-02762009000700008	Brum-Soares, L., Cubides, J. C., Burgos, I., Monroy, C., Castillo, L., Gonzalez, S., . . . Urrutia, P. P. P. (2016). High seroconversion rates in Trypanosoma cruzi chronic infection treated with benznidazole in people under 16 years in Guatemala. Revista da Sociedade Brasileira de Medicina Tropical, 49(6), 721-727. doi:http://dx.doi.org/10.1590/0037-8682-0415-2016						Unknown			4	Checked	Checked	Unchecked	Diagnosis, treatment, and follow-up of patients under 18 years of age seropositive for T. cruzi in rural Yoro, Honduras (1999-2002); Olopa, Guatemala (2003-2006); Entre Rios, Bolivia (2002-2006); and periurban Sucre, Bolivia (2005-2008). The age group included increased over time: Yoro under 12 years old; Olopa and Entre Rios under 15 years; and Sucre under 18 years.	Honduras	Five municipalities in the Yoro department, Honduras	15.3, -87.1	Central America	Lower middle	Checked	Checked	Checked	Unchecked	Checked	Unchecked	Unchecked	Unchecked	Endemic	231	231	229	Number of patients at 18 months follow-up as reported in Escriba2009.	Guatemala	Olopa, Guatemala	14.6, -89.3	Central America	Lower middle	Checked	Checked
Yun2009	Study Arm	1
Zulantay 1998			-99	Zulantay Alfaro, I., Apt Baruch, W., Rodríguez T, J., Venegas H, J., & Sánchez P, G. (1998). Evaluación serológica del tratamiento de la enfermedad de Chagas crónica con alopurinol e itraconazol. Rev Med Chil, 126(3), 265-270.	Full text publication	1997-11-28	Ines Zulantay	Unidad de Parasitologia, Gran Avenida 3100, Santiago, Chile. Fax 56-2-5562659	0								Unknown			2	Unchecked	Unchecked	Checked	Patients in the first group have a positive xenodiagnostic results, while those in the second have a negative xenodiagnosis result.	Chile	Further details not reported	-26.506195, -69.748348	South America	High	Unchecked	Unchecked	Unchecked	Checked	Unchecked	Unchecked	Unchecked	Checked	Endemic	45	45	45	-1	Chile	No further details reported	-26.506195, -69.748348	South America	High	Unchecked	Unchecked
Zulantay 1998	Study Arm	1
Zulantay 1998	Study Arm	2
Zulantay 1998	Study Arm	3
[truncated: 333 more columns]

## Sheet: GRADE assessment
Study Title or Short Hand Reference	year	time_period	Levels.of.quality.of.a.body.of.evidence.in.the.GRADE.approach
Abramson 2013	2013	post_2010	Low
Albareda 2015	2015	post_2010	Low
Albareda 2018	2018	post_2010	Low
Aldasoro 2015	2011	post_2010	Low
Aldasoro 2018	2018	post_2010	Low
Altcheh 2003	2002	2000_2009	Low
Altcheh 2005	2005	2000_2009	Low
Altcheh 2011	2011	post_2010	Low
Altcheh2014	2014	post_2010	Low
Altclas2005	2005	2000_2009	Low
Alvarez2016	2015	post_2010	Low
Andrade 2013	2013	post_2010	Low
Andrade 2016	2016	post_2010	Low
Apt1998	1998	pre_2000	High
Bahamonde 2002	2002	2000_2009	Low
Balouz 2017	2017	post_2010	Low
Barbosa 2016	2016	post_2010	Low
Bertocchi 2013	2013	post_2010	Low
Bianchi2015	2015	post_2010	Low
Cardoso 2018	2018	post_2010	Low
Chippaux2013	2012	post_2010	Moderate
Coronado2006	2006	2000_2009	Low
Correia 2017	2017	post_2010	Low
Crespillo-AndÃºjar 2018	2018	post_2010	Low
Cutrullis2011	2011	post_2010	Low
Da Silva Marques 2003	2003	2000_2009	Low
Das Neves Pinto2009	2008	2000_2009	Very Low
de Castro2006	2006	2000_2009	Low
Egui 2019	2019	post_2010	Low
Fernandes2009	2009	2000_2009	Low
Fernandez-Villegas 2011	2011	post_2010	Low
Fernandez-Villegas2016	2016	post_2010	Low
Fernandez2016	2016	post_2010	Very Low
Flevaud 2015	2015	post_2010	Low
Flores-Chavez2006	2005	2000_2009	Very Low
Forsyth2016	2016	post_2010	Low
Francisco-Gonzalez 2017	2017	post_2010	Low
Fumado 2014	2014	post_2010	Low
Garcia-Bournissen2015	2014	post_2010	Low
Gorgolas 2013	2013	post_2010	Low
Gray 2018	2018	post_2010	Very Low
Jackson2010	2010	post_2010	Low
Lacunza2006	2006	2000_2009	Very Low
Lacunza 2015	2015	post_2010	Low
Laucella2009	2009	2000_2009	Moderate
Llaguno 2019	2019	post_2010	Low
Martinez-Perez2016	2016	post_2010	Low
Mateus 2017	2017	post_2010	Low
Meira 2006	2006	2000_2009	Low
Molina2014; CHAGASAZOL	2014	post_2010	Low
Molina2015	2015	post_2010	Low
Momper 2019	2019	post_2010	Very low
MonjeRumi2013	2013	post_2010	Low
Moreira 2015b	2015	post_2010	Low
Morillo2015; BENEFIT trial	2015	post_2010	Moderate
Morillo2017_2; STOP-CHAGAS	2017	post_2010	Moderate
Moroni 2019	2019	post_2010	Very Low
Munoz 2006	2006	2000_2009	Low
Munoz2013	2013	post_2010	Low
Munoz 2019	2019	post_2010	Low
Murcia2016	2016	post_2010	Low
Murcia2017	2017	post_2010	Low
Niborski2016	2016	post_2010	Low
Oliviera 2010	2010	post_2010	Low
Ortiz 2019	2018	post_2010	Low
Perez-Anton 2018	2018	post_2010	Very Low
Perez-Ayala2011	2010	post_2010	Low
Perez-Mazliah2013	2012	post_2010	Very Low
Pinazo 2010	2010	post_2010	Low
Pinazo 2013	2012	post_2010	Low
Pinazo2016	2016	post_2010	Low
Pontes 2010	2009	2000_2009	Very Low
Pupulin 2003	2003	2000_2009	Low
Rassi1999	1999	pre_2000	Very Low
Rassi 2000	2000	2000_2009	Low
Rassi 2002	2002	2000_2009	Low
Rassi2007	2006	2000_2009	Very Low
Ribeiro 2010	2010	post_2010	Low
Robello 2019	2019	post_2010	Low
Ruiz Lancheros 2018	2018	post_2010	Low
Salvador2015	2015	post_2010	Low
Sanchez 2016	2016	post_2010	Low
Sanchez Negrette2008	2007	2000_2009	Very Low
Sartor2017	2017	post_2010	Low
Sartori 2007	2007	2000_2009	Low
Schijman2003	2003	2000_2009	Low
Silveira2000	2000	2000_2009	Low
Simon 2019	2019	post_2010	Low
Solari1998	1998	pre_2000	Very Low
Solari2001	2001	2000_2009	Low
SosaEstani1998	1998	pre_2000	Moderate
Sosa Estani 2004	2003	2000_2009	High
Soverow 2019	2019	post_2010	Low
Soy2015; CINEBENZ	2015	post_2010	Low
Sperandio da Silva 2017	2017	post_2010	Low
Streiger2004	2004	2000_2009	Low
Suarez 2005	2005	2000_2009	Low
Tornheim2013	2013	post_2010	Moderate
Torrico2017	2017	post_2010	High
Valente 2009	2008	2000_2009	Low
Vallejo2016	2016	post_2010	Low
Velasquez 2019	2019	post_2010	Low
Venegas 1997	1997	pre_2000	Low
Vera de Bilbao2004	2005	2000_2009	Low
Viotti2006	2006	2000_2009	Moderate
Viotti2011	2011	post_2010	Low
Wendling 2011	2011	post_2010	Low
Yun2009	2009	2000_2009	Low
Zulantay 1998	1997	pre_2000	Low
